# Supplementary material for: Interventions to improve early cancer diagnosis of symptomatic individuals: a scoping review
Source: PubMed Central journal article supplement — BMJ Open. 2021 Nov 9;11(11):e055488. doi: 10.1136/bmjopen-2021-055488 (PMC8578990; doi:10.1136/bmjopen-2021-055488), 2021-11-09
Supplement: bmjopen-2021-055488.draft_revisions.pdf [file bmjopen-2021-055488.draft_revisions.pdf]

# BMJ Open

BMJ Open is committed to open peer review. As part of this commitment we make the peer review history of every article we publish publicly available.

When an article is published we post the peer reviewers' comments and the authors' responses online. We also post the versions of the paper that were used during peer review. These are the versions that the peer review comments apply to.

The versions of the paper that follow are the versions that were submitted during the peer review process. They are not the versions of record or the final published versions. They should not be cited or distributed as the published version of this manuscript.

BMJ Open is an open access journal and the full, final, typeset and author-corrected version of record of the manuscript is available on our site with no access controls, subscription charges or pay-per-view fees (<http://bmjopen.bmj.com>).

If you have any questions on BMJ Open's open peer review process please email [info.bmjopen@bmj.com](mailto:info.bmjopen@bmj.com)

# BMJ Open

## Improving early cancer diagnosis following clinical presentation of symptomatic patients: A scoping review

|                               |                                                                                                                                                                                                                                                                                                                                                                                                                                                                                                                                                                                                                                                                                                                                                                                          |
|-------------------------------|------------------------------------------------------------------------------------------------------------------------------------------------------------------------------------------------------------------------------------------------------------------------------------------------------------------------------------------------------------------------------------------------------------------------------------------------------------------------------------------------------------------------------------------------------------------------------------------------------------------------------------------------------------------------------------------------------------------------------------------------------------------------------------------|
| Journal:                      | <i>BMJ Open</i>                                                                                                                                                                                                                                                                                                                                                                                                                                                                                                                                                                                                                                                                                                                                                                          |
| Manuscript ID                 | bmjopen-2021-055488                                                                                                                                                                                                                                                                                                                                                                                                                                                                                                                                                                                                                                                                                                                                                                      |
| Article Type:                 | Original research                                                                                                                                                                                                                                                                                                                                                                                                                                                                                                                                                                                                                                                                                                                                                                        |
| Date Submitted by the Author: | 13-Jul-2021                                                                                                                                                                                                                                                                                                                                                                                                                                                                                                                                                                                                                                                                                                                                                                              |
| Complete List of Authors:     | Okoli, George; University of Manitoba Max Rady College of Medicine<br>Lam, Otto; University of Manitoba Max Rady College of Medicine<br>Reddy, Viraj; University of Manitoba Max Rady College of Medicine<br>Copstein, Leslie; University of Manitoba Max Rady College of Medicine<br>Askin, Nicole; University of Manitoba<br>Prashad, Anubha; Canadian Partnership Against Cancer<br>Stiff, Jennifer; Canadian Partnership Against Cancer<br>Khare, Satya Rashi; Canadian Partnership Against Cancer<br>Leonard, Robyn; Canadian Partnership Against Cancer<br>Zarin, Wasifa; Unity Health Toronto<br>Tricco, Andrea; Li Ka Shing Knowledge Institute,<br>Abou-Setta, Ahmed; University of Manitoba Max Rady College of<br>Medicine; University of Manitoba, Community Health Sciences |
| Keywords:                     | ONCOLOGY, PREVENTIVE MEDICINE, PRIMARY CARE, PUBLIC HEALTH                                                                                                                                                                                                                                                                                                                                                                                                                                                                                                                                                                                                                                                                                                                               |
|                               |                                                                                                                                                                                                                                                                                                                                                                                                                                                                                                                                                                                                                                                                                                                                                                                          |

SCHOLARONE™  
Manuscripts

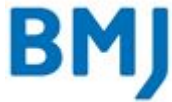

I, the Submitting Author has the right to grant and does grant on behalf of all authors of the Work (as defined in the below author licence), an exclusive licence and/or a non-exclusive licence for contributions from authors who are: i) UK Crown employees; ii) where BMJ has agreed a CC-BY licence shall apply, and/or iii) in accordance with the terms applicable for US Federal Government officers or employees acting as part of their official duties; on a worldwide, perpetual, irrevocable, royalty-free basis to BMJ Publishing Group Ltd ("BMJ") its licensees and where the relevant Journal is co-owned by BMJ to the co-owners of the Journal, to publish the Work in this journal and any other BMJ products and to exploit all rights, as set out in our [licence](#).

The Submitting Author accepts and understands that any supply made under these terms is made by BMJ to the Submitting Author unless you are acting as an employee on behalf of your employer or a postgraduate student of an affiliated institution which is paying any applicable article publishing charge ("APC") for Open Access articles. Where the Submitting Author wishes to make the Work available on an Open Access basis (and intends to pay the relevant APC), the terms of reuse of such Open Access shall be governed by a Creative Commons licence – details of these licences and which [Creative Commons](#) licence will apply to this Work are set out in our licence referred to above.

Other than as permitted in any relevant BMJ Author's Self Archiving Policies, I confirm this Work has not been accepted for publication elsewhere, is not being considered for publication elsewhere and does not duplicate material already published. I confirm all authors consent to publication of this Work and authorise the granting of this licence.

1  
2  
3 **1 Improving early cancer diagnosis following clinical presentation of symptomatic patients:**

4  
5 **2 A scoping review**

6  
7  
8  
9  
10  
11 4 George N Okoli (0000-0002-6437-930X), Otto LT Lam, Viraj K. Reddy, Leslie Copstein, Nicole

12  
13 5 Askin, Anubha Prashad, Jennifer Stiff, Satya Rashi Khare, Robyn Leonard, Wasifa Zarin,

14  
15 6 Andrea C Tricco (0000-0002-4114-8971), Ahmed M Abou-Setta (0000-0003-0153-9916)

16  
17  
18  
19 8 George N Okoli (senior researcher)<sup>1</sup>

20  
21 9 Otto LT Lam (systematic reviewer)<sup>1</sup>

22  
23  
24 10 Viraj K Reddy (systematic reviewer)<sup>1</sup>

25  
26 11 Leslie Copstein (systematic reviewer)<sup>1</sup>

27  
28 12 Nicole Askin (librarian)<sup>2</sup>

29  
30 13 Anubha Prashad (commissioner)<sup>3</sup>

31  
32 14 Jennifer Stiff (commissioner)<sup>3</sup>

33  
34 15 Satya Rashi Khare (commissioner)<sup>3</sup>

35  
36 16 Robyn Leonard (commissioner)<sup>3</sup>

37  
38 17 Wasifa Zarin (research manager)<sup>4</sup>

39  
40 18 Andrea C Tricco (associate professor)<sup>4,5,6</sup>

41  
42 19 Ahmed M Abou-Setta (assistant professor)<sup>1,7</sup>

43  
44  
45  
46  
47  
48  
49 21 <sup>1</sup>George and Fay Yee Centre for Healthcare Innovation, Max Rady College of Medicine, Rady

50  
51 22 Faculty of Health Sciences, University of Manitoba, Winnipeg, MB, Canada

52  
53  
54 23 <sup>2</sup>Neil John Maclean Health Sciences Library, University of Manitoba, Winnipeg, MB, Canada

1  
2  
3 24 <sup>3</sup>Canadian Partnership Against Cancer (the Partnership), Toronto, ON, Canada

4  
5 25 <sup>4</sup>Knowledge Translation Program, St. Michael's Hospital, Unity Health, Toronto, ON, Canada

6  
7 26 <sup>5</sup>Epidemiology Division and Institute for Health Policy, Management, and Evaluation, Dalla

8  
9 27 Lana School of Public Health, University of Toronto, Toronto, ON, Canada

10  
11 28 <sup>6</sup>Queen's Collaboration for Health Care Quality, Joanna Briggs Institute (JBI) Centre of

12  
13 29 Excellence at Queen's University, ON, Canada

14  
15 30 <sup>7</sup>Community Health Sciences, Max Rady College of Medicine, Rady Faculty of Health Sciences,

16  
17 31 University of Manitoba, Winnipeg, MB, Canada

18  
19 32

20  
21 33 **Correspondence to:** G N Okoli [George.Okoli@umanitoba.ca](mailto:George.Okoli@umanitoba.ca) George & Fay Yee Centre for

22  
23 34 Healthcare Innovation, 753 McDermot Avenue, Winnipeg, MB, R3Y 0T6, Canada

24  
25 35

26  
27 36 **Funding:** This study was funded in part by the Canadian Partnership Against Cancer (the

28  
29 37 Partnership) and the Canadian Institutes of Health Research (CIHR) under the Strategy for

30  
31 38 Patient Oriented-Research (SPOR) initiative, through the SPOR Evidence Alliance. Andrea

32  
33 39 Tricco is funded by a Tier 2 Canada Research Chair in Knowledge Synthesis.

34  
35 40

36  
37 41 **Competing interests declaration:** All authors declare that they have no conflicts of interest: no

38  
39 42 financial relationships with any organisations that might have an interest in the submitted work,

40  
41 43 and no relationships or activities that could appear to have influenced the submitted work.

42  
43 44

44  
45 45 **Patient consent:** Not applicable

46  
47 46

1  
2  
3 47 **Contributor and guarantor information:** Conceptualization (A Prashad, J Stiff, W Zarin, A  
4 Tricco); Methodology (GN Okoli, A Prashad, J Stiff, W Zarin, A Tricco & AM Abou-Setta);  
5 48  
6 Tricco); Methodology (GN Okoli, A Prashad, J Stiff, W Zarin, A Tricco & AM Abou-Setta);  
7  
8 49 Data acquisition (GN Okoli, OLT Lam, VK Reddy, L Copstein, N Askin, & AM Abou-Setta);  
9  
10 50 Formal analysis (GN Okoli); Draft manuscript (GN Okoli & AM Abou-Setta); Final manuscript  
11  
12 51 revisions (GN Okoli, OLT Lam, VK Reddy, L Copstein, N Askin, A Prashad, J Stiff, R Khare, R  
13  
14 52 Leonard, W Zarin, A Tricco & AM Abou-Setta); Guarantor (GN Okoli & AM Abou-Setta). The  
15  
16 53 corresponding author (the manuscript's guarantor) attests that all listed authors meet authorship  
17  
18 54 criteria and that no others meeting the criteria have been omitted.  
19  
20  
21  
22  
23

24 56 **Copyright/license for publication:** The Corresponding Author has the right to grant on behalf  
25  
26 57 of all authors and does grant on behalf of all authors, a worldwide licence to the Publishers and  
27  
28 58 its licensees in perpetuity, in all forms, formats and media (whether known now or created in the  
29  
30 59 future), to (i) publish, reproduce, distribute, display and store the Contribution, (ii) translate the  
31  
32 60 Contribution into other languages, create adaptations, reprints, include within collections and  
33  
34 61 create summaries, extracts and/or, abstracts of the Contribution, (iii) create any other derivative  
35  
36 62 work(s) based on the Contribution, (iv) to exploit all subsidiary rights in the Contribution, (v) the  
37  
38 63 inclusion of electronic links from the Contribution to third party material where-ever it may be  
39  
40 64 located, and, (vi) licence any third party to do any or all of the above.  
41  
42  
43  
44  
45

46  
47 66 **Transparency declaration:** The corresponding author affirms that the manuscript is an honest,  
48  
49 67 accurate, and transparent account of the study being reported; that no important aspects of the  
50  
51 68 study have been omitted; and that any discrepancies from the study as planned have been  
52  
53 69 explained.  
54  
55  
56  
57  
58  
59  
60

1  
2  
3 70 **Abstract**

4  
5 71 **Objectives:** To summarize the current evidence regarding interventions for accurate and timely  
6  
7 72 cancer diagnosis among symptomatic individuals.

8  
9  
10 73 **Design:** A scoping review following the Joanna Briggs Institute's (JBI's) methodological  
11  
12 74 framework for the conduct of scoping reviews and reported in accordance with the Preferred  
13  
14 75 Reporting Items for Systematic Reviews and Meta-analyses extension for scoping reviews  
15  
16 76 (PRISMA-ScR) checklist.

17  
18  
19  
20 77 **Data sources:** MEDLINE (Ovid), CINAHL (EBSCOhost) and PsycINFO (Ovid) bibliographic  
21  
22 78 databases, and websites of relevant organizations.

23  
24  
25 79 **Methods:** Published (peer reviewed) and unpublished literature in the English language were  
26  
27 80 searched for from January 2017 to January 2021. Study participants were individuals of any age  
28  
29 81 presenting at clinics with symptoms indicative of cancer. Interventions included practice  
30  
31 82 guidelines, care pathways or other initiatives focused on achieving pre-defined benchmarks or  
32  
33 83 targets for wait times, streamlined or rapid cancer diagnostic services, multidisciplinary teams,  
34  
35 84 and patient navigation strategies. Outcomes included accuracy and timeliness of cancer  
36  
37 85 diagnosis. We summarized findings graphically and descriptively.

38  
39  
40  
41  
42 86 **Results:** From 21,298 retrieved citations, 88 unique published (peer-reviewed) articles and 16  
43  
44 87 unique unpublished documents (grey literature on 18 study reports), met the eligibility for  
45  
46 88 inclusion. About half of the published literature and 83% of the unpublished literature were from  
47  
48 89 the United Kingdom. Most of the studies were on interventions in lung cancer patients. Rapid  
49  
50 90 referral pathways and technology for supporting and streamlining the cancer diagnosis process  
51  
52  
53 91 were the most studied interventions. Interventions were mostly complex and organization-

1  
2  
3 92 specific. Common themes among the effective interventions were multidisciplinary collaboration  
4  
5 93 and the use of a nurse navigator.  
6  
7

8 94 **Conclusions:** Multidisciplinary cooperation and involvement of a nurse navigator may be unique  
9  
10 95 features to consider when designing, delivering, and evaluating interventions focused on  
11  
12 96 improving accurate and timely cancer diagnosis among symptomatic individuals. Future research  
13  
14 97 should examine the effectiveness of the complex and organization-specific nature of the  
15  
16 98 interventions identified through this review.  
17  
18  
19

20 99  
21  
22 100 **Review protocol registration details:** Protocol submitted as an appendix.  
23  
24

25 101  
26  
27 102 **Keywords:** Early cancer diagnosis; Symptomatic patients; Interventions; Scoping review  
28  
29  
30  
31  
32  
33  
34  
35  
36  
37  
38  
39  
40  
41  
42  
43  
44  
45  
46  
47  
48  
49  
50  
51  
52  
53  
54  
55  
56  
57  
58  
59  
60



1  
2  
3 103 **Strengths and limitations of this study**  
4

- 5 104 • A knowledge synthesis librarian developed the search strategy for this review and this  
6  
7 was peer reviewed by an independent knowledge synthesis librarian using the PRESS  
8 105  
9 checklist.  
10 106  
11  
12 107 • The literature search was limited to evidence from the last 4 years and only evidence  
13  
14 from English-language publications and organizational websites.  
15 108  
16  
17 109 • This review did not summarize effectiveness of interventions across cancer patient types  
18  
19 and regions.  
20 110  
21  
22 111 • We adhered to known guidelines and standards in the conduct and reporting of the  
23  
24 review.  
25 112  
26  
27 113 • In line with the JBI's guidance for the conduct of scoping reviews, we did not attempt to  
28  
29 evaluate the quality of the included studies or provide an assessment of the quality of the  
30  
31 evidence.  
32

33 116

34  
35  
36 117

37  
38 118

39  
40 119

41  
42 120

43  
44  
45 121

46  
47 122

48  
49 123

50  
51 124

52  
53  
54 125  
55  
56  
57  
58  
59  
60

## 126 **Introduction**

127 Cancer is the second leading cause of death globally, with about 1 in 6 deaths attributable to the  
128 disease.<sup>1</sup> It was estimated in 2020 that over 19 million new cases and about 10 million deaths  
129 were attributable to cancer globally.<sup>2</sup> This rate is estimated to be over 28 million new cases by  
130 2040.<sup>2</sup> High human development index (HDI) countries such as Canada will likely experience  
131 the greatest increase in incidence in absolute cancer burden, with an estimated over 4 million  
132 new cases more in 2040 compared with 2020.<sup>2</sup> This is mostly due to the growth and aging of the  
133 population and increasing prevalence of cancer risk factors.<sup>2</sup> Estimates from Canada alone  
134 suggest that every day 617 people in Canada will be diagnosed with cancer, with about 228 also  
135 dying from the disease.<sup>3</sup>

136 Although cancer can occur at any age, the risk of the disease increases with age.  
137 Globally, cancer incidence rates vary, mostly because of differences in risk factors and early  
138 detection practices. Likewise, cancer death rates vary, partly because of differences in  
139 availability and effectiveness of cancer control strategies, such as early diagnosis and access to  
140 timely and effective treatment. With timely diagnosis and treatment initiation, significant  
141 improvements can be made in the lives of cancer patients. Moreover, many cancers have higher  
142 curative and survival rates if diagnosed early. This means that cancer burden could be reduced  
143 substantially through early detection and management of patients who present with symptoms.<sup>4</sup>

144 When not diagnosed following early symptomatic presentation, cancer diagnosis often  
145 occurs at more advanced stages of the disease, when treatment may be less effective and cancer  
146 prognosis will be poor. Early cancer diagnosis of symptomatic patients entails carefully planned,  
147 well-integrated, culturally safe and equitable clinical evaluation and diagnostic services.<sup>4</sup> These

1  
2  
3 148 services should be designed to reduce delays in and barriers to diagnosis to allow detection at  
4  
5 149 earlier stages of the disease and commence treatment in a timely manner.  
6

7  
8 150 There are various service-focused interventions to improve early cancer diagnosis of  
9  
10 151 symptomatic patients. Interventions such as centralized or coordinated diagnostic services,  
11  
12 152 multidisciplinary team development and support, patient navigational strategies and referral  
13  
14 153 pathways, service targets or benchmarks for wait times, and technology to support diagnosis  
15  
16 154 have been implemented with varying levels of success. Knowledge of the available interventions  
17  
18 155 and how they have been implemented is necessary to inform the development, implementation,  
19  
20 156 and evaluation of effective early cancer diagnosis initiatives.  
21  
22  
23  
24 157

## 158 **Methods**

159 This report is a summary of the study commissioned by the Canadian Partnership Against Cancer  
160 (the Partnership). The Partnership contributed to specifying the study objectives and questions,  
161 and in summarizing the evidence.

162 We undertook a scoping review following the Joanna Briggs Institute's (JBI's) guidance  
163 for the conduct of scoping reviews.<sup>5</sup> This framework includes defining and aligning the  
164 objective(s) and question(s) for the review, developing and aligning the inclusion criteria with  
165 the review objective(s) and question(s), and describing the planned approach to evidence  
166 searching. It also includes selecting, extracting, and charting of evidence; summarizing the  
167 evidence in relation to the objectives and questions; and consultation of information scientists,  
168 librarians, and/or experts throughout the process. **Appendix 1** is the work plan approved by the  
169 Partnership for the scoping review.

170 We summarized the current evidence regarding interventions focused on improving  
171 accurate and timely cancer diagnosis among symptomatic individuals, including practice  
172 guidelines, care pathways or targets for wait times, streamlined or rapid diagnostic services,  
173 multidisciplinary teams, and patient navigation strategies. We also summarized innovative  
174 interventions (for example, those with a technological component) and approaches to seamless  
175 (minimally disruptive) care of symptomatic individuals and identified performance metrics that  
176 can be used to measure improvements in the pre-diagnosis phase. Additionally, we summarized  
177 the key points of the patient trajectory from initial symptom presentation to cancer diagnosis.

178 We report our findings in accordance with the Preferred Reporting Items for Systematic  
179 Reviews and Meta-analyses extension for Scoping Reviews (PRISMA-ScR) checklist.<sup>6</sup>

180

### 181 *Search strategy*

182 A knowledge synthesis librarian designed a search strategy for MEDLINE (Ovid). This search  
183 strategy was peer-reviewed independently by another knowledge synthesis librarian using the  
184 Peer Review of Electronic Search Strategies (PRESS) checklist.<sup>7</sup> The revised search strategy was  
185 then adapted for Cumulative Index to Nursing and Allied Health Literature (CINAHL)  
186 (EBSCOhost) and PsycINFO (Ovid) bibliographic databases. The search strategy for each of the  
187 databases is presented in the appendices (**Appendix 2 - 4**). In addition to searching bibliographic  
188 databases, we searched websites of relevant organizations and professional bodies (**Appendix 5**)  
189 and hand-searched reference lists of potentially relevant publications.

### 191 *Study selection criteria and data extraction*

192 The review questions were: (1) are there practice guidelines, care pathways or other initiatives  
193 (example, benchmarks/ targets for wait times, streamlined or rapid diagnostic services,  
194 multidisciplinary teams, patient navigators and/or navigation) that have been found to enhance  
195 accurate and timely cancer diagnosis in symptomatic individuals?; (2) what are the leading  
196 interventions (e.g., technology-based) to seamless care (i.e., minimally disruptive care that is  
197 found to be more convenient/coordinated/timely/less stressful to the patients) in the cancer pre-  
198 diagnosis phase within Canada and abroad?; (3) what are the identified performance metrics that  
199 can be used to measure the suspicion to diagnosis phase; and where and how are these metrics  
200 used?; and (4) have specific considerations been applied to underserved populations including  
201 Indigenous, rural, and remote populations within the context of each of the questions above?

202 Published (peer-reviewed) and unpublished (grey literature) articles in the English  
203 language from January 2017 to January 2021 were included. The decision to include articles

1  
2  
3 204 from 2017 was because the Partnership had previously summarized prior evidence  
4  
5 205 (<https://bit.ly/3xlACsR>) and the present focus was on current interventions. Study participants  
6  
7  
8 206 were individuals of any age presenting at clinics with symptoms. Interventions included practice  
9  
10 207 guidelines, care pathways or other initiatives focused on achieving pre-defined benchmarks or  
11  
12 208 targets for wait times, streamlined or rapid diagnostic services, multidisciplinary teams, and  
13  
14  
15 209 patient navigation strategies. Outcomes included accuracy and timeliness of cancer diagnosis.

16  
17 210 All retrieved citations from the literature search were imported and managed in EndNote  
18  
19 211 (Version X9). One reviewer screened each citation for eligibility. Two reviewers independently  
20  
21 212 screened the full texts of relevant citations and reviewed the reference list of the included full-  
22  
23 213 text articles for potentially relevant citations. Disagreements between the reviewers were  
24  
25  
26 214 resolved through discussion or involvement of a third reviewer. The number of screened citations  
27  
28 215 and both the number and reason for exclusion of full-text articles were documented. Extraction  
29  
30 216 and charting of relevant data from the included articles was performed by one reviewer and  
31  
32  
33 217 another reviewer independently checked the data for errors. Disagreements between the  
34  
35 218 reviewers were resolved through discussion or involvement of a third reviewer.

36  
37  
38 219

### 40 220 ***Data synthesis and analysis***

41  
42 221 Characteristics of the included published articles are presented in a tabular form and descriptive  
43  
44 222 analysis is reported graphically and descriptively. Characteristics of the included unpublished  
45  
46 223 articles are reported descriptively only. Relevant findings from the review of both published and  
47  
48  
49 224 unpublished articles are summarized separately and descriptively, by review question, focusing  
50  
51 225 on the interventions related to each question. Interventions are grouped as centralized or  
52  
53  
54 226 coordinated diagnostic service; interventions to enhance diagnostic services; multidisciplinary

1  
2  
3 227 team; patient navigation; rapid referral pathway; remote or rural populations-focused;  
4  
5 228 standardized care pathway; support for primary care providers; target or benchmark; and  
6  
7  
8 229 technology to support the diagnostic process. These interventions are defined in **Appendix 6**.

9  
10 230 Effectiveness of an intervention was determined based on relevant study results.  
11

12 231  
13

14 232 ***Patient and public involvement***

15  
16  
17 233 Involvement of patients or the public in this study was based on the Strategy for Patient  
18

19 234 Oriented-Research (SPOR) initiative.  
20  
21  
22  
23  
24  
25  
26  
27  
28  
29  
30  
31  
32  
33  
34  
35  
36  
37  
38  
39  
40  
41  
42  
43  
44  
45  
46  
47  
48  
49  
50  
51  
52  
53  
54  
55  
56  
57  
58  
59  
60

## 235 **Results**

236 Out of a total of 21,298 retrieved citations, 88 unique published articles<sup>8-95</sup> and 16 unique  
237 unpublished (grey literature representing 18 different reports)<sup>96-111</sup> met the inclusion criteria. The  
238 article selection process is detailed below (**Figure 1**). Fifty-seven of the published articles were  
239 from Europe, 14 articles from North America, 9 articles from Oceania, 3 articles each from  
240 Africa and Asia, and one article each from the Middle East and South America. Almost half of  
241 these articles (n = 40) were from the United Kingdom (UK) alone. A geographic map of  
242 published articles is shown in **Figure 2**.

243 Of the 18 unpublished reports (16 articles), 83% were from the UK, 11% from Canada  
244 and 6% from the United States of America (USA). Forty percent (n = 35) of the published  
245 articles were for case-control studies, 29% (n = 26) for cross-sectional studies, 22% (n = 19) for  
246 before-and-after studies, 7% (n = 6) for randomized controlled studies, and 1% (n = 1) each for  
247 guideline development and mixed methods studies. In terms of the unpublished articles, 89% (n  
248 = 16) were before-and-after studies and the rest (n = 2) were cross-sectional studies. **Figure 3**  
249 shows the distribution of the cancer types reported by the published articles; approximately 30%  
250 (n = 26) reported on multiple cancer types, while the rest reported on specific cancer types, of  
251 which lung cancer was the most frequent (about 23% of the publications (n = 20)). Of the  
252 unpublished articles, half reported on lung cancer, 28% on multiple cancer types, 11% on breast  
253 cancer, and 5.5% each on brain and gastrointestinal cancers.

254 **Figure 4** shows the distribution of intervention types across the published articles. Nearly  
255 20% of the published articles were on rapid referral pathway interventions while less than 1%  
256 each were on multidisciplinary team, patient navigation, and remote/rural-focused interventions.  
257 Of the unpublished articles, half reported on rapid referral pathway interventions, 11% each



1  
2  
3 258 reported on standardized care pathway, target/ benchmark for wait times, and technology to  
4  
5 259 support the diagnosis process, and 5.5% each reported on centralized or coordinated diagnostic  
6  
7 260 service and interventions to enhance diagnostic services. Most of the published articles (94%; n  
8  
9 = 83) reported a performance metric used to measure an improvement in the suspicion to  
10  
11 261 diagnosis phase of cancer.  
12  
13 262

14  
15 263 Eighty-three percent (n = 73) of the articles reported either a practice guideline, care  
16  
17 264 pathway or an initiative such as benchmark/target for wait times, streamlined or rapid diagnostic  
18  
19 265 service, multidisciplinary team development, and a patient navigation strategy to enhance  
20  
21 266 accurate and timely cancer diagnosis. Thirty-one percent (n = 27) of the articles reported (not  
22  
23 267 explicitly) on a key point of care as patients navigate the health system, from initial suspicion to  
24  
25 268 diagnosis of cancer. Twenty-nine percent (n = 25) of the articles reported on a leading innovative  
26  
27 269 intervention or approach to seamless care in the pre-cancer diagnosis phase, while 4.5% (n = 4)  
28  
29 270 of the articles reported on some form of consideration for underserved populations. Some of the  
30  
31 271 articles reported on two or more of the above. Details of relevant characteristics of the published  
32  
33 272 articles are presented in **Table 1** (those reporting effective interventions) and **Appendix 7** (those  
34  
35 273 reporting ineffective interventions) and **Appendix 8** (those focused on remote/and rural  
36  
37 274 populations).  
38  
39  
40  
41  
42  
43

#### 44 276 **Initiatives to enhance accurate and timely cancer diagnosis**

45  
46 277 This review identified various initiatives to enhance accurate and timely cancer diagnosis. These  
47  
48 278 were often designed, developed, and implemented often with the involvement of primary care  
49  
50 279 providers (physicians and nurses), but not patients. These initiatives are grouped into related  
51  
52 280 interventions and the evidence regarding each intervention is discussed below.  
53  
54  
55

56 281

### 282 *Centralized or coordinated diagnostic services*

283 Nine published articles on centralized or coordinated diagnostic services for adult lung cancer (n  
284 = 5) and breast cancer (n = 4) patients were identified.<sup>18,21,30,31,42,52-54,91</sup> Five were from  
285 Canada,<sup>21,31,42,52,53</sup> and there was one each from Denmark,<sup>18</sup> New Zealand,<sup>91</sup> South Africa,<sup>54</sup> and  
286 the UK<sup>30</sup>. The focus and metrics for assessment of the effectiveness of these diagnostic services  
287 varied, but all were found to be effective. These include the rapid access to pulmonary  
288 investigation and diagnosis (RAPID) program in Wythenshawe Hospital, Manchester, UK with  
289 expedited (next working day) computed tomography (CT) and reporting in suspected lung cancer  
290 cases,<sup>30</sup> and the Thoracic Triage Panel in a tertiary care centre in St. John's, Newfoundland,  
291 Canada, a multidisciplinary centralized referral program, whose key components include a nurse  
292 navigator who coordinates patient care and act as the contact person for patients and clinicians  
293 involved in the program, weekly multidisciplinary (thoracic specialists) meetings, and regular  
294 communications with the primary care provider.<sup>21</sup> The diagnostic services also include the rapid  
295 investigation clinic in a tertiary health centre in Montreal, Canada established to coordinate and  
296 accelerate the workup of patients with suspected lung cancer,<sup>31</sup> the improved respiratory fast  
297 track clinic (RFTC) in Northland district of New Zealand that comprises reserved slots for CT  
298 for those referred with a suspicion of lung cancer, bronchoscopy slots and CT-guided biopsy,<sup>91</sup>  
299 and the Danish lung cancer package at the Center for Lung Cancer, Odense University Hospital,  
300 Odense, Denmark, a fast-track diagnostic pathway in the hospital setting.<sup>18</sup> Further, there was the  
301 rapid access breast clinic in British Columbia, Canada that provides close collaboration between  
302 clinicians and radiologists, facilitated by clinical pathways and nurse navigation,<sup>52,53</sup> the  
303 diagnostic assessment units in Ontario, Canada, focusing on diagnosis at a dedicated breast  
304 assessment unit,<sup>42</sup> and the breast clinic at a tertiary hospital in Western Cape Province of South

1  
2  
3 305 Africa, an open-access one-stop diagnostic breast clinic where women may present with a letter  
4  
5 306 from a primary level provider (nurse practitioner or doctor) and receive the same day clinical and  
6  
7 307 cytological evaluation with referral to the combined breast clinic if the breast cytology is positive  
8  
9  
10 308 for malignancy.<sup>54</sup>

11  
12 309 In addition to the above, one unpublished article was identified.<sup>111</sup> This was for the Breast  
13  
14 310 ACCESS Project in Ohio, USA, which scheduled patients for a surgical consult within 2 days  
15  
16 311 and a biopsy within 5 days after the surgical consult, with the aim of reducing wait times  
17  
18 312 between abnormal diagnostic mammogram findings to biopsy from 26 to 7 days (7-day ACCESS  
19  
20 313 goal).

21  
22 314

### 23 24 315 *Interventions to enhance diagnostic services*

25  
26 316 Twelve published articles on interventions to enhance diagnostic services were  
27  
28 317 identified.<sup>8,15,22,50,51,62,73,75,76,78,81,92</sup> These articles were focused on varied cancer types; four on  
29  
30 318 multiple cancers, two on lung cancer, two on skin cancer, and one each on breast,  
31  
32 319 gastrointestinal, haematological and prostate cancers. Four articles were from the UK,<sup>15,50,51,76</sup>  
33  
34 320 two articles each from Canada<sup>22,62</sup> and Sweden,<sup>8,78</sup> and one article each from Botswana,<sup>92</sup>  
35  
36 321 Columbia,<sup>73</sup> Indonesia,<sup>75</sup> and the USA.<sup>81</sup> The focus and metrics for assessment of the  
37  
38 322 effectiveness of the interventions varied across the publications, and while most were effective,  
39  
40 323 one intervention for lung cancer and one intervention for skin cancer in the UK<sup>51</sup> and Sweden<sup>8</sup>,  
41  
42 324 respectively, were ineffective. The effective interventions were reducing diagnosis through  
43  
44 325 emergency presentation by improving general practice referral in England, UK,<sup>50</sup> the guided  
45  
46 326 personal quality of life (QoL) feedback intervention during the Cancer Research UK's North  
47  
48 327 West regional summer roadshow in Manchester, UK, aimed at offering guided feedback about  
49  
50 328 personal QoL to adults with potential cancer symptoms, living in deprived communities to

1  
2  
3 329 promote help seeking in primary care among the communities,<sup>76</sup> the mandatory primary care  
4  
5 330 access to faecal immunochemical testing (FIT) in Nottingham, UK, integrated with the 2-week  
6  
7 331 wait pathway, aimed at improving gastrointestinal cancer diagnosis rather than relying on age  
8  
9 332 and symptoms alone,<sup>15</sup> the Stronach Regional Cancer Centre lung diagnostic assessment program  
10  
11 333 (DAP) at Southlake Regional Health Centre, Ontario, Canada, aimed at using learnings from a  
12  
13 334 Lean improvement event to provide coordinated, expedited care for all patients undergoing a  
14  
15 335 possible lung cancer diagnosis and to achieve/improve upon the provincial wait time target from  
16  
17 336 consultation to diagnosis for lung cancer patients,<sup>22</sup> the nurse practitioner-led lymphoma rapid  
18  
19 337 diagnosis clinic in a tertiary care cancer center (Princess Margaret Cancer Centre, part of  
20  
21 338 University Health Network) in Ontario, Canada, aimed at reducing wait times for a definitive  
22  
23 339 diagnosis of lymphoma,<sup>62</sup> the expedited one-stop prostate cancer diagnosis using advanced  
24  
25 340 imaging and biopsy techniques in a health institution (name not reported) in the USA, aimed at  
26  
27 341 expediting prostate cancer diagnosis.<sup>81</sup> There were also the Swedish Diagnostic Center at the  
28  
29 342 Central Hospital of Kristianstad, Sweden, introduced as a separate outpatient unit within the  
30  
31 343 Department of Internal Medicine to expedite diagnostics,<sup>78</sup> the Partners for Cancer Care and  
32  
33 344 Prevention action plan in Cali, Columbia, aimed at improving access to a coordinated program of  
34  
35 345 screening and early diagnosis of breast and cervical cancers in three health care centers that serve  
36  
37 346 subsidized populations,<sup>73</sup> the dermatology-led quality improvement initiatives in Gaborone,  
38  
39 347 Botswana, aimed at improving multispecialty care coordination,<sup>92</sup> and the culturally sensitive,  
40  
41 348 narrative self-help intervention named PERANTARA (PEngantar peRAwataN kesehaTAn  
42  
43 349 payudaRA [translated as introduction to breast health treatment]) across four hospitals in  
44  
45 350 Bandung, West Java, Indonesia, aimed at reducing time to diagnosis in women with breast  
46  
47 351 cancer symptoms.<sup>75</sup> In addition to the above, one unpublished article on the Accelerate,  
48  
49  
50  
51  
52  
53  
54  
55  
56  
57  
58  
59  
60

1  
2  
3 352 Coordinate, Evaluate (ACE) program in the UK was identified.<sup>98</sup> This program was an early  
4  
5 353 cancer diagnosis initiative and focused on testing innovations that either identify individuals at  
6  
7  
8 354 high risk of cancer earlier or streamline diagnostic pathways.  
9

10 355 The ineffective interventions were the standardized care diagnostic pathway at the  
11  
12 356 Department of Clinical Pathology, Akademiska University Hospital in Uppsala, Sweden  
13  
14 357 (introduced by the Swedish health authorities to eliminate unwanted delay in the diagnostics of  
15  
16  
17 358 melanoma)<sup>8</sup> and the 4-week national lung cancer symptom awareness campaign in Wales, UK,  
18  
19 359 aimed at increasing urgent suspected cancer referrals and clinical outcomes.<sup>51</sup>  
20

21  
22 360

### 23 24 361 *Multidisciplinary team*

25  
26 362 Three multidisciplinary team lung cancer approaches were identified from published articles:  
27  
28 363 from the USA<sup>66,83</sup> and Australia.<sup>48</sup> The focus and metrics for assessment of the effectiveness of  
29  
30 364 the approaches varied across the publications. One approach from the USA was found to be  
31  
32  
33 365 effective,<sup>66</sup> whereas the others were found to be ineffective. The effective approach was the lung  
34  
35 366 cancer strategist program, a thoracic surgeon-guided, multidisciplinary (disciplines not reported)  
36  
37 367 care program in hospitals in Massachusetts, USA, aimed at improving timeliness of lung cancer  
38  
39  
40 368 diagnosis and treatment.<sup>66</sup> The ineffective approaches were the pre-diagnosis multidisciplinary  
41  
42 369 tumour board (physicians from radiology, medical and radiation oncology, and  
43  
44 370 pulmonary medicine) discussions in a clinic in Cleveland, USA aimed at improving the  
45  
46  
47 371 timeliness of diagnostic evaluation in lung cancer,<sup>83</sup> and the Victorian lung cancer service  
48  
49 372 redesign project in Victoria, Australia, which involved multidisciplinary (patients, governance,  
50  
51 373 administration, clinicians and health information services) evaluation aimed at quality  
52  
53  
54 374 improvement collaborative on timeliness and management in lung cancer.<sup>48</sup> In addition, nine  
55  
56 375 unpublished articles from the UK were identified.<sup>97,99-101,104,106,107,110</sup> These included four articles  
57  
58  
59  
60

1  
2  
3 376 regarding a “straight to CT access” pathway, on community pharmacy direct referral to lung  
4  
5 377 cancer pathway, rapid colorectal diagnostic pathway, and optometrist direct referral to  
6  
7 378 neuroscience pathway. All but the chest x-ray pathway<sup>107</sup> were found to be effective.  
9

10 379

### 11 380 *Standardized care pathways*

12  
13  
14 381 Eleven published articles on standardized care pathways were identified.<sup>9,10,24,33,37,39,47,57,61,68,69</sup>  
15  
16 382 These articles were focused on varied cancer types (4 each for multiple cancers, and 1 each for  
17  
18 383 ear-nose-throat, urinary tract, and gastrointestinal cancers). Three articles were from  
19  
20 384 Denmark,<sup>24,37,39</sup> two from the UK,<sup>33,68</sup> and one each from Canada,<sup>57</sup> Norway,<sup>47</sup> Sweden,<sup>61</sup>  
21  
22 385 Spain,<sup>10</sup> and Saudi Arabia.<sup>9</sup> The publications were on adult patient populations with one also  
23  
24 386 involving paediatric patients. The focus and metrics for assessment of the effectiveness of the  
25  
26 387 pathways varied across the publications. The main effective pathways were the national  
27  
28 388 diagnostic cancer pathway in Norway, with recommended maximum limits for time spent in the  
29  
30 389 diagnostic process as well as mandatory reporting of the actual time intervals for all patients with  
31  
32 390 suspected lung cancer,<sup>47</sup> and the standardized triage process in the Southeastern Ontario, Canada,  
33  
34 391 which entailed a twice-weekly nurse–physician triage, preordered staging tests and scheduling  
35  
36 392 according to urgency, redirection and recommendations for inappropriate referrals, and new  
37  
38 393 small nodule clinic.<sup>57</sup> Other main effective pathways were the standardized diagnostic pathway  
39  
40 394 for suspected urothelial cancer initiated by primary healthcare providers and specialists in Skane  
41  
42 395 County, Sweden, and comprises CT urography, urinary cytology and cystoscopy,<sup>61</sup> the early  
43  
44 396 colonoscopy track (within 30 days from referral) in a tertiary referral hospital in Tenerife,  
45  
46 397 Spain,<sup>10</sup> and the fast-track cancer care pathway in Denmark (national), with maximum acceptable  
47  
48 398 time thresholds from referral to diagnosis and treatment.<sup>37</sup> In addition, two unpublished articles  
49  
50  
51  
52  
53  
54  
55  
56  
57  
58  
59  
60

1  
2  
3 399 from Canada<sup>109</sup> and the UK<sup>96</sup> focusing on breast and lung cancers, respectively, were identified.  
4  
5 400 These were the Alberta Health Services Diagnostic Assessment Pathway and the Somerset  
6  
7 401 Integrated Lung Cancer Pathway. While the Canadian pathway was found to be effective, the  
8  
9  
10 402 pathway from the United Kingdom was not effective.  
11  
12  
13

#### 14 404 ***Support for primary care providers***

15  
16  
17 405 There were four publications on support for primary care providers (PCP), all from the  
18  
19 406 UK.<sup>25,29,46,95</sup> Two were focused on multiple cancer types, and one each focused on  
20  
21 407 gastrointestinal and brain cancers. The publications were on adult patient populations with one  
22  
23 408 being also involving paediatric patients. The focus and metrics for assessment of the  
24  
25 409 effectiveness of the support packages (all educational and informational) varied across the  
26  
27  
28 410 publications. None of the support packages was found to be effective, with the identified  
29  
30 411 common theme being a lack of awareness of referral guidelines and associated knowledge by  
31  
32 412 GPs. These ineffective support packages were the use of the Kernick and NICE guidelines as  
33  
34 413 evidence-based support to assist primary care physicians in identifying patients most at risk of  
35  
36 414 having a brain tumour, but also on the fastest route to achieve diagnosis (example, direct access  
37  
38 415 imaging versus urgent secondary care referral) in Scotland, the UK,<sup>95</sup> the use of the national  
39  
40 416 cancer waiting times monitoring dataset for system performance assessment by primary care  
41  
42 417 physicians in England, the UK,<sup>25</sup> and the use of safety netting by primary care physicians in  
43  
44 418 Oxfordshire, UK to ensure that patients are monitored until their symptoms or signs are  
45  
46 419 explained, and to guard against delays in diagnosis.<sup>29</sup>  
47  
48  
49  
50  
51

52 420

#### 53 421 ***Target or benchmark for wait times***



1  
2  
3 422 There were eight published articles related to targets or benchmarks for wait  
4  
5 423 times.<sup>13,40,41,67,71,79,86,94</sup> Three of these articles were from the UK,<sup>67,71,79</sup> two articles from  
6  
7 424 Australia,<sup>40,86</sup> and one article each from China,<sup>41</sup> Sweden,<sup>94</sup> and New Zealand<sup>13</sup>. These  
8  
9 425 publications were focused on varied cancer types (2 each for multiple, lung and gastrointestinal  
10  
11 426 cancers, and 1 each for prostate and skin cancers), and were on adult patient populations, with  
12  
13 427 one publication involving paediatric patients. The focus and metrics for assessment of the  
14  
15 428 effectiveness of the target or benchmarks varied across the publications, and all but two  
16  
17 429 targets/benchmarks<sup>13,86</sup> were found to be effective. The effective targets or benchmarks were the  
18  
19 430 28-day faster diagnosis standard in the National Health Service England, UK, defined as the time  
20  
21 431 within which the patient is informed whether they do or do not have cancer,<sup>71</sup> the fast-track  
22  
23 432 diagnostic workup for men with suspected prostate cancer at the Urology Department at Orebro  
24  
25 433 University Hospital in Sweden, which entailed targeting the shortest possible waiting-time for a  
26  
27 434 diagnostic workup process,<sup>94</sup> and the optimal timeframes for referral and diagnosis of lung lesion  
28  
29 435 at Latrobe Regional Hospital in Victoria, Australia established by the National Cancer Expert  
30  
31 436 Reference Group as part of the optimal care pathway for people with lung cancer.<sup>40</sup> The  
32  
33 437 ineffective targets or benchmarks was the New Zealand Ministry of Health's "faster cancer  
34  
35 438 treatment" standards of service provision for melanoma patients, with a target of  
36  
37 439 histopathological diagnosis of melanoma reported within five working days in 80% of cases, and  
38  
39 440 all cases reported in 10 working days.<sup>13</sup> In addition, two unpublished articles from Canada<sup>103</sup> and  
40  
41 441 the UK<sup>105</sup> focusing on multiple cancers were identified, and these were the "2-week wait"  
42  
43 442 benchmark in the UK (already discussed under rapid referral pathways) and the Canadian Breast  
44  
45 443 Cancer Screening Network targets for diagnostic intervals:  $\geq 90\%$  of abnormal screens to be  
46  
47  
48  
49  
50  
51  
52  
53  
54  
55  
56  
57  
58  
59  
60



1  
2  
3 444 resolved within 5 weeks if no biopsy is required and  $\geq 90\%$  within 7 weeks if a tissue biopsy is  
4  
5 445 required.

6  
7  
8 446

9  
10 447 ***Innovative interventions to enhanced care in cancer pre-diagnosis phase***

11  
12 448 This review identified 17 published articles related to technological interventions for enhanced  
13  
14 449 care in the pre-diagnosis phase of cancer.<sup>14,19,20,27,35,36,49,55,56,60,63,64,77,80,85,87,89</sup> Ten of these articles  
15  
16 450 were from the UK,<sup>20,27,35,36,49,55,60,63,64,89</sup> two articles were from New Zealand,<sup>77,80</sup> and one article  
17  
18 451 each was from Denmark,<sup>87</sup> Netherlands,<sup>19</sup> Italy,<sup>14</sup> India,<sup>85</sup> and Spain.<sup>56</sup> These publications  
19  
20 452 focused on varied cancer types in adult patient populations, with two also involving paediatric  
21  
22 453 patients. The interventions had little patient input in their design, development, or  
23  
24 454 implementation. The focus and metrics for assessment of the effectiveness of the interventions  
25  
26 455 varied across the publications. The main identified interventions were the use of teledermatology  
27  
28 456 in skin cancer diagnosis. This involved the taking of images, including dermoscopy by GPs and  
29  
30 457 sending them for evaluation to specialized dermatologists.<sup>36,60,77,87</sup> The process is embedded in  
31  
32 458 an e-referral system developed in Auckland, New Zealand for suspected skin malignancy,<sup>80</sup> and  
33  
34 459 included teledermatology images triaged as confirmed, likely or suspected melanoma, the use of  
35  
36 460 a web-based referral tool for head and neck cancers at two different hospitals in Birmingham,  
37  
38 461 West Midlands, and Wexham, Berkshire, UK.<sup>49</sup> There was also the use of the Digitally  
39  
40 462 Assembled Referral Toolkit (DART) for 2-week referral, accessible via a cloud-based template,  
41  
42 463 which contained new referral forms native to GP clinical systems in the UK.<sup>27</sup> Additionally,  
43  
44 464 there was the use of an electronic straight-to-test pathway at a large tertiary referral hospital in  
45  
46 465 England, UK to remove hospital-based triage from suspected colorectal cancer pathways; this  
47  
48  
49  
50  
51  
52  
53  
54 466 allows GPs to book tests supported by a decision aid based on the NICE guidance, thus,

1  
2  
3 467 eliminating the need for a standard referral form or triage process.<sup>63</sup> Further, there was the use of  
4  
5 468 electronic clinical decision support for melanoma in four general practices in the Southeast of  
6  
7 469 England, UK, which involved the use of an electronic-based 7-point checklist to assess  
8  
9  
10 470 pigmented lesions,<sup>64</sup> the use of machine learning algorithms in Newcastle, UK to classify  
11  
12 471 patients referred on the 2-week wait pathway for suspected head and neck cancer into different  
13  
14 472 diagnostic groups, albeit very broad ones: cancer and non-cancer,<sup>55</sup> the use of nurse-led  
15  
16 473 assessments to evaluate certain groups of patients suspected to have bowel cancer in England,  
17  
18 474 the UK,<sup>20</sup> and the use of varied smartphone-based skin and oral self-monitoring and screening  
19  
20 475 applications, in England, UK<sup>89</sup> and in the India,<sup>85</sup> respectively. In addition, two unpublished  
21  
22 476 articles from the UK were identified.<sup>104,108</sup> These were for a cancer decision support tool  
23  
24 477 (computer-based programs integrated into a GP's usual patient management system) in  
25  
26 478 Gateshead, London, and a clinical web portal (CWP) electronic system in Manchester, England,  
27  
28 479 with the fundamental part of the CWP being that local clinicians had to take personal  
29  
30  
31 480 responsibility for data input.  
32  
33  
34  
35  
36  
37

### 38 482 *Performance metrics to measure improvements in suspicion to diagnosis phase*

39  
40 483 Varied performance metrics were identified by this review. The main metrics are summarized  
41  
42 484 according to intervention type (**Appendix 9**). While performance metrics appear to be mainly  
43  
44 485 intervention-dependent, time from presentation in primary care to diagnosis and from referral  
45  
46 486 from primary care to specialist consultation, appear to be the most consistent metrics used for  
47  
48 487 evaluation. Performance metrics to measure patients' experience mainly centered on patients'  
49  
50 488 satisfaction and quality of life.  
51  
52  
53  
54  
55  
56  
57  
58  
59  
60

1  
2  
3 490 *Specific considerations for underserved populations*

4  
5 491 Four published articles focused on issues related specifically to underserved populations, with all  
6  
7 492 focused on remote/rural populations.<sup>16,28,58,86</sup> These publications were from the UK,<sup>58</sup>  
8  
9 493 Australia,<sup>28,86</sup> and Mexico.<sup>16</sup> A fifth publication only used the patients' area of residence as part  
10  
11 494 of their model.<sup>93</sup> All of the publications were on multiple cancer types and adult populations,  
12  
13 495 although one included a paediatric population. The specific considerations for underserved  
14  
15 496 populations and the evidence regarding them included a publication from Scotland, the UK, a  
16  
17 497 national audit of cancer diagnosis in Scottish and English general practices, exploring and  
18  
19 498 comparing patient characteristics, diagnostic intervals, and routes to diagnosis,<sup>58</sup> the publication  
20  
21 499 from New South Wales, Australia on a study that examined geographic variations in time  
22  
23 500 intervals leading up to treatment for head and neck cancer, with assessment of differences based  
24  
25 501 on remoteness of residence (regional/remote or metropolitan) at two tertiary referral centres,<sup>86</sup> a  
26  
27 502 publication from Mexico City, Mexico on evaluation of a patient navigation program to reduce  
28  
29 503 referral time to cancer centers for underserved patients with a suspicion or diagnosis of cancer at  
30  
31 504 a public general hospital,<sup>16</sup> and a publication from Western Australia, a cluster-randomized  
32  
33 505 controlled trial of a complex intervention to reduce time to diagnosis in rural cancer patients with  
34  
35 506 the aim of measuring the effect of community-based symptom awareness and general practice-  
36  
37 507 based educational interventions on the time to diagnosis in rural patients presenting with breast,  
38  
39 508 prostate, colorectal or lung cancer.<sup>28</sup>

40  
41  
42  
43  
44  
45  
46  
47 509

## 510 **Discussion**

511 This scoping review of 88 published and 16 unpublished documents from January 2017 to  
512 January 2021 summarizes the evidence on current interventions focused on improving accurate  
513 and timely cancer diagnosis among symptomatic individuals. The identified articles were from  
514 varied study designs including case-control (most common), cross-sectional, before-and-after,  
515 and mixed methods studies, and randomized controlled trials. There was little evidence to  
516 suggest that patients were involved in the design, development, or implementation of  
517 interventions to enhanced care in cancer pre-diagnosis phase.

518 The evidence suggests that interventions focused on improving accurate and timely  
519 cancer diagnosis among symptomatic individuals are active topics of research. The UK appears  
520 to be championing this area of research, contributing about half of all identified published  
521 literature and 83% of the identified unpublished literature. Of the specific cancer patient types,  
522 lung cancer patients appear to be the most researched, ranking highest among the patient  
523 populations of published and unpublished literature. Of the studied interventions, rapid referral  
524 pathways and technology for supporting and streamlining the diagnosis process were the two  
525 most reported interventions. Overall, varied national and regional centralized or coordinated  
526 diagnostic services, interventions to enhance diagnostic services, multidisciplinary team  
527 approaches, patient navigation approaches, rapid referral pathways, standardized care pathways,  
528 support for primary care providers, target or benchmarks, technologies to support diagnosis  
529 process, and insights regarding variations between remote/rural and urban populations have been  
530 reported although there were no articles that focused specifically on Indigenous populations.  
531 Many of these intervention types could be adapted to suit different health systems and  
532 jurisdictions around the world.

1  
2  
3 533 The interventions mostly comprised multiple interventions/ changes to the healthcare  
4  
5 534 pathway. As such, the interventions examined varied widely across the studies. This was true  
6  
7  
8 535 even when applied to the same cancer patient populations and in the same jurisdictions/  
9  
10 536 countries, including those where an intervention was part of the standard care pathway. As such,  
11  
12 537 it is difficult, perhaps impossible, to identify one main approach alone that drives an  
13  
14 538 intervention. Methodological approaches also varied significantly with regard to outcome  
15  
16 539 assessment. A common theme among the effective centralized or coordinated diagnostic  
17  
18 540 services, interventions to enhance diagnostic services, patient navigation approaches, and  
19  
20 541 standardized care pathways is multidisciplinary collaboration and the involvement of a nurse  
21  
22 542 navigator.

23  
24  
25  
26 543 The implications of the findings from this scoping review are that it is difficult to  
27  
28 544 determine a specific intervention, or stand-alone approach to an intervention. It is also difficult to  
29  
30 545 assess the true effectiveness of many of the interventions, especially considering the differing  
31  
32 546 composite nature of the interventions, the fact that the evidence is mostly from observational  
33  
34 547 studies, and the range of outcome measures used to measure effectiveness. While many of the  
35  
36 548 interventions could be adapted to suit different health systems and jurisdictions, emphasis should  
37  
38 549 be on the context and the strengths and limitations of the individual health system, and a clear  
39  
40 550 evidence-based performance metric for appropriate evaluation of effectiveness of an intervention  
41  
42 551 ought to be determined a priority. Diagnosing cancer faster and more accurately at an earlier  
43  
44 552 stage is a key priority of the 2019-2029 Canadian Strategy for Cancer Control  
45  
46 553 ([www.partnershipagainstcancer.ca/cancer-strategy/](http://www.partnershipagainstcancer.ca/cancer-strategy/)). Over the next 5 years, the Canadian  
47  
48  
49  
50  
51 554 Partnership Against Cancer will leverage findings from this scoping review, as one of several  
52  
53  
54  
55  
56  
57  
58  
59  
60

1  
2  
3 555 inputs, and partner with Canadian jurisdictions to continue to test innovative models of care that  
4  
5 556 expedite cancer diagnosis, especially for Indigenous and underserved populations.  
6  
7

8 557

9  
10 558 **Limitations and merits**

11  
12 559 There are some limitations to this study. The literature search was developed by a knowledge  
13  
14 560 synthesis librarian and peer reviewed by an independent knowledge synthesis librarian using the  
15  
16 561 PRESS checklist, searching of appropriate databases and websites for literature, and adherence to  
17  
18 562 known guidelines and standards in the conduct and reporting of the review. Even so, the  
19  
20 563 literature search was limited to evidence from the last 4 years and only evidence from English-  
21  
22 564 language publications and organizational websites. As such, potentially eligible articles could  
23  
24 565 have been missed.  
25  
26

27  
28 566 The eligibility criteria for inclusion were not limited to only comparative studies. This  
29  
30 567 meant that the focus of some of the included studies was not specifically on the assessment of  
31  
32 568 effectiveness of an intervention, which was based solely on the reported outcome in the articles.  
33  
34 569 As such, an intervention that appeared effective in a study may be ineffective in another study  
35  
36 570 depending on the assessed outcome with no clear reason for this discrepancy. Furthermore, this  
37  
38 571 review did not assess effectiveness of interventions across cancer patient types and  
39  
40 572 jurisdictions/regions. This would have allowed assessment of any differences in intervention  
41  
42 573 effectiveness by patient type and study jurisdiction. Lastly, and in line with the JBI's guidance  
43  
44 574 for the conduct of scoping reviews, we did not attempt to evaluate the quality of the included  
45  
46 575 studies or provide an assessment of the quality of the evidence.  
47  
48  
49  
50

51 576

52  
53  
54 577 **Conclusions**

1  
2  
3 578 The evidence suggests that interventions focused on improving accurate and timely cancer  
4  
5 579 diagnosis among symptomatic individuals are active topics of research, particularly in lung  
6  
7 580 cancer patient populations, and that the UK is championing this area of research. While the  
8  
9 581 themes of the studied interventions are similar, the interventions differ in many ways within the  
10  
11 582 same intervention group. Multidisciplinary cooperation and involvement of a nurse navigator  
12  
13 583 appeared to be unique features of many of the effective interventions. Canadian and other  
14  
15 584 jurisdictions can leverage these lessons learned to develop and implement strategies adapted to  
16  
17 585 local health system needs to improve the cancer pre-diagnosis phase. Future research should  
18  
19 586 examine the effectiveness of the complex and organization-specific nature of the interventions  
20  
21 587 identified through this review.  
22  
23  
24  
25

26 588

28 589 **Data sharing statement:** All the data for this study are reported in the text and appendices. No  
29  
30 additional data available.  
31  
32

33 591

35 592 **Ethics approval:** Not applicable.  
36  
37

38 593

40 594 **Details of the role of the study sponsors:** The Canadian Partnership Against Cancer (the study  
41  
42 595 commissioner) contributed to specifying the study objectives and questions, and in summarizing  
43  
44 596 the evidence.  
45  
46

47 597

49 598 **Patient and public involvement:** Involvement of patients or the public in this study was based  
50  
51 599 on the Strategy for Patient Oriented-Research (SPOR) initiative.  
52  
53  
54  
55  
56  
57  
58  
59  
60

600 **References**

- 601 1. Mortality GBD, Causes of Death C. Global, regional, and national life expectancy, all-  
602 cause mortality, and cause-specific mortality for 249 causes of death, 1980-2015: a  
603 systematic analysis for the Global Burden of Disease Study 2015. *Lancet*.  
604 2016;388(10053):1459-1544.
- 605 2. Sung H, Ferlay J, Siegel RL, et al. Global cancer statistics 2020: GLOBOCAN estimates  
606 of incidence and mortality worldwide for 36 cancers in 185 countries. *CA Cancer J Clin*.  
607 2021.
- 608 3. The Canadian Cancer Society. Cancer statistics at a glance. The Canadian Cancer  
609 Society. <https://bit.ly/2OjxxOO>. Published 2021. Accessed March 04, 2021.
- 610 4. World Health Organization. Fact Sheets: Cancer. The World Health Organization.  
611 <https://bit.ly/3c0xaL4>. Published 2018. Accessed March 04, 2021.
- 612 5. Peters MDJ, Marnie C, Tricco AC, et al. Updated methodological guidance for the  
613 conduct of scoping reviews. *JBIM Evid Synth*. 2020;18(10):2119-2126.
- 614 6. Tricco AC, Lillie E, Zarin W, et al. PRISMA Extension for Scoping Reviews (PRISMA-  
615 ScR): Checklist and Explanation. *Ann Intern Med*. 2018;169(7):467-473.
- 616 7. McGowan J, Sampson M, Salzwedel DM, Cogo E, Foerster V, Lefebvre C. PRESS Peer  
617 Review of Electronic Search Strategies: 2015 Guideline Statement. *J Clin Epidemiol*.  
618 2016;75:40-46.
- 619 8. Agnarsdottir M, Paaren H, Vassilaki I. The impact of standardized care pathway on  
620 reporting time for invasive melanoma - results from one pathology department in  
621 Sweden. *Ups J Med Sci*. 2019;124:260-264.
- 622 9. Almuammar A. Primary health care factors associated with late presentation of cancer in  
623 Saudi Arabia. *Journal of Radiotherapy in Practice*. 2020;19:71-75.
- 624 10. Alonso-Abreu I, Alarcon-Fernandez O, Gimeno-Garcia AZ, et al. Early Colonoscopy  
625 Improves the Outcome of Patients With Symptomatic Colorectal Cancer. *Dis Colon*  
626 *Rectum*. 2017;60:837-844.
- 627 11. Antel K, Louw VJ, Maartens G, Oosthuizen J, Verburgh E. Diagnosing lymphoma in the  
628 shadow of an epidemic: lessons learned from the diagnostic challenges posed by the dual  
629 tuberculosis and HIV epidemics. *Leuk Lymphoma*. 2020:1-5.



- 1  
2  
3 630 12. Arhi CS, Burns EM, Bottle A, et al. Delays in referral from primary care worsen survival  
4 631 for patients with colorectal cancer: a retrospective cohort study. *Br J Gen Pract.*  
5 632 2020;70:e463-e471.
- 6  
7  
8 633 13. Brian T, Adams B, Jameson M. Cutaneous melanoma: an audit of management  
9 634 timeliness against New Zealand guidelines. *N Z Med J.* 2017;130:54-61.
- 10  
11  
12 635 14. Cazzaniga S, Castelli E, Di Landro A, et al. Mobile teledermatology for melanoma  
13 636 detection: Assessment of the validity in the framework of a population-based skin cancer  
14 637 awareness campaign in northern Italy. *J Am Acad Dermatol.* 2019;81:257-260.
- 15  
16  
17 638 15. Chapman C, Thomas C, Morling J, et al. Early clinical outcomes of a rapid colorectal  
18 639 cancer diagnosis pathway using faecal immunochemical testing in Nottingham.  
19 640 *Colorectal Dis.* 2020;22:679-688.
- 20  
21  
22 641 16. Chavarri-Guerra Y, Soto-Perez-de-Celis E, Ramos-Lopez W, et al. Patient Navigation to  
23 642 Enhance Access to Care for Underserved Patients with a Suspicion or Diagnosis of  
24 643 Cancer. *Oncologist.* 2019;24:1195-1200.
- 25  
26  
27 644 17. Chng M, Coulter IC, Surash S. Impact of the updated NICE referral pathway for patients  
28 645 with suspected brain cancer on a neuroscience service. *Br J Neurosurg.* 2020:1-5.
- 29  
30  
31 646 18. Christensen HM, Huniche L. Patient perspectives and experience on the diagnostic  
32 647 pathway of lung cancer: A qualitative study. *SAGE Open Med.*  
33 648 2020;8:2050312120918996.
- 34  
35  
36 649 19. Chung Y, van der Sande AAJ, de Roos KP, et al. Poor agreement between the automated  
37 650 risk assessment of a smartphone application for skin cancer detection and the rating by  
38 651 dermatologists. *J Eur Acad Dermatol Venereol.* 2020;34:274-278.
- 39  
40  
41 652 20. Cock K. Nurse-led service development for suspected bowel cancer. *Cancer Nursing*  
42 653 *Practice.* 2017;16:28-31.
- 43  
44  
45 654 21. Common JL, Mariathas HH, Parsons K, et al. Reducing Wait Time for Lung Cancer  
46 655 Diagnosis and Treatment: Impact of a Multidisciplinary, Centralized Referral Program.  
47 656 *Can Assoc Radiol J.* 2018;69:322-327.
- 48  
49  
50 657 22. Cotton C, Mahut C, Blyth J, et al. Using Lean to Improve Wait Time Performance in  
51 658 Diagnostic Assessment for Lung Cancer. *Healthc Q.* 2020;22:59-63.
- 52  
53  
54  
55  
56  
57  
58  
59  
60

- 1  
2  
3 659 23. Creak A. Prospective Cohort of Referrals to a Cancer of Unknown Primary Clinic,  
4 including Direct Access from Primary Care. *Clin Oncol (R Coll Radiol)*. 2020;32:e87-  
5 660 e92.  
6 661  
7  
8 662 24. Dahl TL, Vedsted P, Jensen H. The effect of standardised cancer pathways on Danish  
9 cancer patients' dissatisfaction with waiting time. *Dan Med J*. 2017;64.  
10 663  
11 664 25. Di Girolamo C, Walters S, Gildea C, Benitez Majano S, Racht B, Morris M. Can we  
12 assess Cancer Waiting Time targets with cancer survival? A population-based study of  
13 individually linked data from the National Cancer Waiting Times monitoring dataset in  
14 665 England, 2009-2013. *PLoS ONE*. 2018;13:e0201288.  
15 666  
16 667  
17 668 26. Drudge-Coates L, Khati V, Ballesteros R, et al. A nurse practitioner model for the  
18 assessment of suspected prostate cancer referrals is safe, cost and time efficient.  
19 669  
20 *Ecancermedalscience*. 2019;13:994.  
21 670  
22 671 27. Eastham R, Duffy S, Foster C, Beaumont A. DART: a new look at the 2-week wait  
23 suspected cancer referral process. *Br J Gen Pract*. 2017;67:560.  
24 672  
25 673 28. Emery JD, Gray V, Walter FM, et al. The Improving Rural Cancer Outcomes Trial: a  
26 cluster-randomised controlled trial of a complex intervention to reduce time to diagnosis  
27 674 in rural cancer patients in Western Australia. *Br J Cancer*. 2017;117:1459-1469.  
28 675  
29 676 29. Evans J, Ziebland S, MacArtney JI, Bankhead CR, Rose PW, Nicholson BD. GPs'  
30 understanding and practice of safety netting for potential cancer presentations: a  
31 677 qualitative study in primary care. *Br J Gen Pract*. 2018;68:e505-e511.  
32 678  
33 679 30. Evison M, Hewitt K, Lyons J, et al. Implementation and outcomes of the RAPID  
34 programme: Addressing the front end of the lung cancer pathway in Manchester. *Clin*  
35 680 *Med*. 2020;20:401-405.  
36 681  
37 682 31. Ezer N, Navasakulpong A, Schwartzman K, Ofiara L, Gonzalez AV. Impact of rapid  
38 investigation clinic on timeliness of lung cancer diagnosis and treatment. *BMC pulm*.  
39 683 2017;17:178.  
40 684  
41 685 32. Fallon M, Adil MT, Ahmed K, Whitelaw D, Rashid F, Jambulingam P. Impact of 'two-  
42 week wait' referral pathway on the diagnosis, treatment and survival in upper and lower  
43 686 gastrointestinal cancers. *Postgrad Med J*. 2019;95:470-475.  
44 687  
45 688 33. Gardner D, Nixon IJ. An analysis of waiting times in patients with thyroid cancer. *Surg*.  
46 689 2020;06:06.  
47  
48  
49  
50  
51  
52  
53  
54  
55  
56  
57  
58  
59  
60

- 1  
2  
3 690 34. Hennessy M, Ryan D, Clarke S, et al. Optimal Timing of CT Scanning in the Rapid  
4  
5 691 Access Lung Cancer Clinic. *Ir Med J*. 2020;113:121.  
6  
7 692 35. Hirst Y, Lim AWW. Acceptability of text messages for safety netting patients with low-  
8  
9 693 risk cancer symptoms: a qualitative study. *Br J Gen Pract*. 2018;68:e333-e341.  
10  
11 694 36. Hunt WTN, Ali L, Marder H, Sansom JE, de Berker DAR. A service evaluation between  
12  
13 695 2-week wait (2WW) skin cancer referrals via teledermatology and the standard face-to-  
14  
15 696 face pathway at a teaching hospital. *Clin Exp Dermatol*. 2020;45:473-476.  
16  
17 697 37. Iachina M, Jakobsen E, Fallesen AK, Green A. Transfer between hospitals as a predictor  
18  
19 698 of delay in diagnosis and treatment of patients with Non-Small Cell Lung Cancer - a  
20  
21 699 register based cohort-study. *BMC Health Serv Res*. 2017;17:267.  
22  
23 700 38. Jefferson L, Atkin K, Sheridan R, et al. Non-attendance at urgent referral appointments  
24  
25 701 for suspected cancer: a qualitative study to gain understanding from patients and GPs. *Br*  
26  
27 702 *J Gen Pract*. 2019;18:18.  
28  
29 703 39. Jensen H, Topping ML, Vedsted P. Prognostic consequences of implementing cancer  
30  
31 704 patient pathways in Denmark: a comparative cohort study of symptomatic cancer patients  
32  
33 705 in primary care. *BMC Cancer*. 2017;17:627.  
34  
35 706 40. Jeyakumar HS, Wright A. Improving regional lung cancer optimal care pathway  
36  
37 707 compliance through a rapid-access respiratory clinic. *Intern Med J*. 2020;50:805-810.  
38  
39 708 41. Jiang T, Ren S, Li X, Su C, Zhou C, O'Brien M. The changing diagnostic pathway for  
40  
41 709 lung cancer patients in Shanghai, China. *Eur J Cancer*. 2017;84:168-172.  
42  
43 710 42. Jiang L, Gilbert J, Langley H, Moineddin R, Groome PA. Is being diagnosed at a  
44  
45 711 dedicated breast assessment unit associated with a reduction in the time to diagnosis for  
46  
47 712 symptomatic breast cancer patients? *Eur J Cancer Care (Engl)*. 2018;27:e12864.  
48  
49 713 43. Jones JA, Catton J, Howard G, et al. Impact of straight to test pathways on time to  
50  
51 714 diagnosis in oesophageal and gastric cancer. *BMJ open qual*. 2018;7:e000328.  
52  
53 715 44. Joyce K, Zermanos T, Badrinath P. Factors associated with variation in emergency  
54  
55 716 diagnoses of cancer at general practice level in England. *J Public Health (Oxf)*.  
56  
57 717 2020;05:05.  
58  
59 718 45. Kassirian S, Dzioba A, Hamel S, et al. Delay in diagnosis of patients with head-and-neck  
60  
719 cancer in Canada: impact of patient and provider delay. *Current Oncology*.  
720  
2020;27:e467-e477.

- 1  
2  
3 721 46. Kidney E, Greenfield S, Berkman L, et al. Cancer suspicion in general practice, urgent  
4 722 referral, and time to diagnosis: a population-based GP survey nested within a feasibility  
5 723 study using information technology to flag-up patients with symptoms of colorectal  
6 724 cancer. *BJGP open*. 2017;1:bjgpopen17X101109.
- 7 725 47. Laerum D, Brustugun OT, Gallefoss F, Falk R, Strand T-E, Fjellbirkeland L. Reduced  
8 726 delays in diagnostic pathways for non-small cell lung cancer after local and National  
9 727 initiatives. *Cancer Treat Res Commun*. 2020;23:100168.
- 10 728 48. Largey G, Briggs P, Davies H, et al. The Victorian Lung Cancer Service Redesign  
11 729 Project: Impacts of a Quality Improvement collaborative on timeliness and management  
12 730 in lung cancer. *Intern Med J*. 2020;08:08.
- 13 731 49. Lau K, Wilkinson J, Moorthy R. A web-based prediction score for head and neck cancer  
14 732 referrals. *Clin Otolaryngol*. 2018;15:15.
- 15 733 50. Laudicella M, Walsh B, Burns E, Li Donni P, Smith PC. What is the impact of rerouting  
16 734 a cancer diagnosis from emergency presentation to GP referral on resource use and  
17 735 survival? Evidence from a population-based study. *BMC Cancer*. 2018;18:394.
- 18 736 51. McCutchan G, Smits S, Ironmonger L, et al. Evaluation of a national lung cancer  
19 737 symptom awareness campaign in Wales. *Br J Cancer*. 2020;122:491-497.
- 20 738 52. McKevitt EC, Dingee CK, Leung S-P, et al. Reduced Time to Breast Cancer Diagnosis  
21 739 with Coordination of Radiological and Clinical Care. *Cureus*. 2017;9:e1919.
- 22 740 53. McKevitt E, Dingee C, Warburton R, et al. Patient navigation reduces time to care for  
23 741 patients with breast symptoms and abnormal screening mammograms. *Am J Surg*.  
24 742 2018;215:805-811.
- 25 743 54. Moodley J, Cairncross L, Naiker T, Constant D. From symptom discovery to treatment -  
26 744 women's pathways to breast cancer care: a cross-sectional study. *BMC Cancer*.  
27 745 2018;18:312.
- 28 746 55. Moor JW, Paleri V, Edwards J. Patient classification of two-week wait referrals for  
29 747 suspected head and neck cancer: a machine learning approach. *J Laryngol Otol*. 2019;1-  
30 748 4.
- 31 749 56. Moreno-Ramirez D, Raya-Maldonado J, Morales-Conde M, et al. Increasing Frequency  
32 750 of Seborrheic Keratosis Diagnoses as a Favorable Consequence of Tele dermatology-

- 1  
2  
3 751 Based Skin Cancer Screening: A Cross-sectional Study of 34,553 Patients. *Am J Clin*  
4 752 *Dermatol.* 2017;18:681-685.
- 5  
6 753 57. Mullin MLL, Tran A, Golemiec B, et al. Improving Timeliness of Lung Cancer  
7 754 Diagnosis and Staging Investigations Through Implementation of Standardized Triage  
8 755 Pathways. *JCO Oncol Pract.* 2020;16:e1202-e1208.
- 9  
10 756 58. Murchie P, Adam R, McNair E, et al. Cancer diagnosis in Scottish primary care: Results  
11 757 from the National Cancer Diagnosis Audit. *Eur J Cancer Care (Engl).* 2020;29:e13234.
- 12  
13 758 59. Neal RD, Barham A, Bongard E, et al. Immediate chest X-ray for patients at risk of lung  
14 759 cancer presenting in primary care: randomised controlled feasibility trial. *Br J Cancer.*  
15 760 2017;116:293-302.
- 16  
17 761 60. Nicholson P, Macedo C, Fuller C, Thomas L. Patient satisfaction with a new skin cancer  
18 762 tele dermatology service. *Clin Exp Dermatol.* 2020;45:691-698.
- 19  
20 763 61. Nilbert M, Blackberg M, Ceberg J, Hagberg O, Stenhoff R, Liedberg F. Diagnostic  
21 764 pathway efficacy for urinary tract cancer: population-based outcome of standardized  
22 765 evaluation for macroscopic haematuria. *Scand J Urol.* 2018;52:237-243.
- 23  
24 766 62. Nixon S, Bezverbnaya K, Maganti M, et al. Evaluation of Lymphadenopathy and  
25 767 Suspected Lymphoma in a Lymphoma Rapid Diagnosis Clinic. *JCO Oncol Pract.*  
26 768 2020;16:e29-e36.
- 27  
28 769 63. Orchard P, Arvind N, Wint A, et al. Removing hospital-based triage from suspected  
29 770 colorectal cancer pathways: the impact and learning from a primary care-led electronic  
30 771 straight-to-test pathway. *BMJ Qual Saf.* 2020;11:11.
- 31  
32 772 64. Pannebakker MM, Mills K, Johnson M, Emery JD, Walter FM. Understanding  
33 773 implementation and usefulness of electronic clinical decision support (eCDS) for  
34 774 melanoma in English primary care: a qualitative investigation. *BJGP open.*  
35 775 2019;3:bjgpopen18X101635.
- 36  
37 776 65. Pearson C, Poirier V, Fitzgerald K, Rubin G, Hamilton W. Cross-sectional study using  
38 777 primary care and cancer registration data to investigate patients with cancer presenting  
39 778 with non-specific symptoms. *BMJ Open.* 2020;10:e033008.
- 40  
41 779 66. Phillips WW, Hofferberth SC, Armitage J, et al. PD01.19 Lung Cancer Strategist  
42 780 Program: a Novel Care Delivery Model to Improve Timeliness of Diagnosis and  
43 781 Treatment. *Journal of Thoracic Oncology.* 2019;14:S1140-S1140.

- 1  
2  
3 782 67. Piano M, Black G, Amelung D, Power E, Whitaker KL. Exploring public attitudes  
4 783 towards the new Faster Diagnosis Standard for cancer: a focus group study with the UK  
5 784 public. *Br J Gen Pract.* 2019;69:e413-e421.
- 6  
7  
8 785 68. Price S, Spencer A, Zhang X, et al. Trends in time to cancer diagnosis around the period  
9 786 of changing national guidance on referral of symptomatic patients: A serial cross-  
10 787 sectional study using UK electronic healthcare records from 2006-17. *Cancer epidemiol.*  
11 788 2020;69:101805.
- 12  
13  
14  
15 789 69. Rankin NM, York S, Stone E, et al. Pathways to Lung Cancer Diagnosis: A Qualitative  
16 790 Study of Patients and General Practitioners about Diagnostic and Pretreatment Intervals.  
17 791 *Ann Am Thorac Soc.* 2017;14:742-753.
- 18  
19  
20 792 70. Round T, Gildea C, Ashworth M, Moller H. Association between use of urgent suspected  
21 793 cancer referral and mortality and stage at diagnosis: a 5-year national cohort study. *Br J*  
22 794 *Gen Pract.* 2020;70:e389-e398.
- 23  
24  
25 795 71. Sagar A, Mai DVC, Divya GS, et al. A colorectal straight-to-test cancer pathway with  
26 796 GP-guided triage improves attainment of the 28-day diagnosis target and increases  
27 797 outpatient clinic capacity. *Colorectal Dis.* 2020;19:19.
- 28  
29  
30 798 72. Sandager M, Jensen H, Lipczak H, Sperling CD, Vedsted P. Cancer patients' experiences  
31 799 with urgent referrals to cancer patient pathways. *Eur J Cancer Care (Engl).*  
32 800 2019;28:e12927.
- 33  
34  
35 801 73. Sardi A, Orozco-Urdaneta M, Velez-Mejia C, et al. Overcoming Barriers in the  
36 802 Implementation of Programs for Breast and Cervical Cancers in Cali, Colombia: A Pilot  
37 803 Model. *J.* 2019;5:1-9.
- 38  
39  
40 804 74. Scott SE, Oakley R, Moller H, Warburton F. Tracking cancer occurrence in the 5 years  
41 805 after referral for suspected head and neck cancer. *Oral Oncol.* 2020;109:104955.
- 42  
43  
44 806 75. Setyowibowo H, Hunfeld JAM, Iskandarsyah A, et al. A self-help intervention for  
45 807 reducing time to diagnosis in Indonesian women with breast cancer symptoms.  
46 808 *Psychooncology.* 2020;29:696-702.
- 47  
48  
49 809 76. Skevington SM, Long H, Gartland N. Does quality of life feedback promote seeking help  
50 810 for undiagnosed cancer? *Qual Life Res.* 2020;29:1609-1619.
- 51  
52  
53  
54  
55  
56  
57  
58  
59  
60



- 1  
2  
3 811 77. Snoswell CL, Caffery LJ, Whitty JA, Soyer HP, Gordon LG. Cost-effectiveness of Skin  
4 812 Cancer Referral and Consultation Using Teledermoscopy in Australia. *JAMA Dermatol.*  
5 813 2018;154:694-700.  
6  
7  
8 814 78. Stenman E, Palmer K, Ryden S, et al. Diagnostic spectrum and time intervals in Sweden's  
9 815 first diagnostic center for patients with nonspecific symptoms of cancer. *Acta Oncol.*  
10 816 2019;58:296-305.  
11  
12  
13 817 79. Stevenson-Hornby V. A rapid-access diagnostic pathway in suspected pancreatic cancer.  
14 818 *Nursing Times.* 2018;114:13-11.  
15  
16  
17 819 80. Sunderland M, Teague R, Gale K, Rademaker M, Oakley A, Martin RCW. E-referrals  
18 820 and teledermatology grading for melanoma: a successful model of care. *Australas J*  
19 821 *Dermatol.* 2020;61:147-151.  
20  
21  
22 822 81. Tafuri A, Ashrafi AN, Palmer S, et al. One-Stop MRI and MRI/transrectal ultrasound  
23 823 fusion-guided biopsy: an expedited pathway for prostate cancer diagnosis. *World J Urol.*  
24 824 2020;38:949-956.  
25  
26  
27 825 82. Talwar C, McClune A, Kelly D, Lowe D, Rogers SN. Two-week rule: suspected head  
28 826 and neck cancer referrals from a general medical practice perspective. *Br J Oral*  
29 827 *Maxillofac Surg.* 2020;58:981-985.  
30  
31  
32 828 83. Thalanayar Muthukrishnan P, Ratnam M, Nguyen M-T, et al. Pre-diagnosis  
33 829 Multidisciplinary Tumor Board and Time to Staging in Lung Cancer: The Case Western  
34 830 MetroHealth Experience. *Cureus.* 2020;12:e6595.  
35  
36  
37  
38 831 84. Thanapal MR, Thin N, Alagaratnam S, et al. Straight-to-test colonoscopy: Has it  
39 832 improved the detection of colorectal cancer? A 7- year review. *Surg.* 2020;26:26.  
40  
41  
42 833 85. Uthoff RD, Song B, Sunny S, et al. Point-of-care, smartphone-based, dual-modality,  
43 834 dual-view, oral cancer screening device with neural network classification for low-  
44 835 resource communities. *PLoS ONE.* 2018;13:e0207493.  
45  
46  
47 836 86. Venchiarutti RL, Clark JR, Palme CE, et al. Influence of remoteness of residence on  
48 837 timeliness of diagnosis and treatment of oral cavity and oropharynx cancer: A  
49 838 retrospective cohort study. *J Med Imaging Radiat Oncol.* 2020;64:261-270.  
50  
51  
52 839 87. Vestergaard T, Prasad SC, Schuster A, et al. Introducing teledermoscopy of possible skin  
53 840 cancers in general practice in Southern Denmark. *Fam Pract.* 2020;37:513-518.  
54  
55  
56  
57  
58  
59  
60

- 1  
2  
3 841 88. Vijayakumar B, Shahidi M, Thakkar R, Prasad A. A novel 2-week wait lung cancer  
4 842 pathway starting with a telephone consultation, with patient satisfaction survey results.  
5 843 *Future Healthc J.* 2020;7:s15.  
6  
7 844 89. Walter FM, Pannebakker MM, Barclay ME, et al. Effect of a Skin Self-monitoring  
8 845 Smartphone Application on Time to Physician Consultation Among Patients With  
9 846 Possible Melanoma: A Phase 2 Randomized Clinical Trial. *JAMA netw.* 2020;3:e200001.  
10  
11 847 90. Whitley EM, Raich PC, Dudley DJ, et al. Relation of comorbidities and patient  
12 848 navigation with the time to diagnostic resolution after abnormal cancer screening.  
13 849 *Cancer.* 2017;123:312-318.  
14  
15 850 91. Williams S, Davies P, Johnson B, Iles S. A fast track clinic improves diagnosis and  
16 851 treatment times for those investigated for lung cancer in Northland District Health Board.  
17 852 *N Z Med J.* 2018;131:29-37.  
18  
19 853 92. Williams VL, Narasimhamurthy M, Rodriguez O, et al. Dermatology-Driven Quality  
20 854 Improvement Interventions to Decrease Diagnostic Delays for Kaposi Sarcoma in  
21 855 Botswana. *J.* 2019;5:1-7.  
22  
23 856 93. Yeşiler Fİ, Çimen F, Atikcan Ş. Factors affecting delay in diagnosis and treatment of  
24 857 lung cancer. *Journal of Surgery & Medicine (JOSAM).* 2020;4:720-724.  
25  
26 858 94. Zhu J, Chen R, Davidsson S, et al. Psychological and physiological impacts of a fast-  
27 859 track diagnostic workup for men with suspected prostate cancer: Preliminary report from  
28 860 a randomized clinical trial. *Cancer Commun (Lond).* 2020;40:239-242.  
29  
30 861 95. Zienius K, Chak-Lam I, Park J, et al. Direct access CT for suspicion of brain tumour: an  
31 862 analysis of referral pathways in a population-based patient group. *BMC Fam Pract.*  
32 863 2019;20:118.  
33  
34 864 96. ACE Programme. Somerset Integrated Lung Cancer Pathway. Phases One and Two Final  
35 865 Report Final Report. In: Group SCC, ed. UK: NHS; 2017:1-12.  
36  
37 866 97. Improving diagnostic pathways for patients with suspected colorectal cancer. In:  
38 867 Accelerate CEP, ed. UK: NHS England, Cancer Research UK and Macmillan Cancer  
39 868 Support; 2017:39.  
40  
41 869 98. Improving diagnostic pathways for patients with vague symptoms. In: Accelerate CEP,  
42 870 ed. UK2017:49.  
43  
44  
45  
46  
47  
48  
49  
50  
51  
52  
53  
54  
55  
56  
57  
58  
59  
60



- 1  
2  
3 871 99. Pharmacy training for early diagnosis of cancer. In: Accelerate CEP, ed. UK: NHS  
4 872 England, Cancer Research UK and Macmillan Cancer Support; 2017:27.  
5  
6 873 100. Streamlining the lung diagnostic pathway (A87). In: Trust CCCGwS, Sussex Healthcare  
7 874 NHS, eds. UK: NHS; 2017:14.  
8  
9 875 101. Streamlining the lung diagnostic pathway (A14). In: Trust H, Mid Sussex CCGwB,  
10 876 Sussex University H, eds. UK: NHS; 2017:27.  
11  
12 877 102. Multidisciplinary Diagnostic Centre (MDC) based pathways for patients with non-  
13 878 specific but concerning symptoms. Interim report. In: Accelerate CEP, ed. UK: NHS  
14 879 England, Cancer Research UK and Macmillan Cancer Support; 2018.  
15  
16 880 103. New Brunswick Cancer Network. Cancer System Performance 2019. In. New Brunswick,  
17 881 Canada: Government of New Brunswick; 2020:36.  
18  
19 882 104. Gill B. Improving diagnostic pathways for patients with suspected lung cancer. In:  
20 883 Accelerate CEP, ed. UK: NHS England, Cancer Research UK and Macmillan Cancer  
21 884 Support; 2017.  
22  
23 885 105. Hamilton M, Hodgson O, Dai D, McDonnell P. Waiting Times for Suspected and  
24 886 Diagnosed Cancer Patients. 2017-18 Annual Report. In: Nhs, ed. UK: NHS England;  
25 887 2018:21.  
26  
27 888 106. Robinson S, Fuller E. South Tees Optical Referral Project (STORP). A project summary.  
28 889 In: Accelerate CEP, ed. UK: NHS; 2017:14.  
29  
30 890 107. Robinson S, Fuller E. A Lung Health Service – Doncaster pharmacy direct referral for  
31 891 chest x-ray. A project summary. In: Accelerate CEP, ed. UK: NHS England, Cancer  
32 892 Research UK and Macmillan Cancer Support; 2017:12.  
33  
34 893 108. Robinson S, Poirier V, Watson S. Using Cancer Decision Support Tools to support the  
35 894 early diagnosis of cancer. In: Accelerate CEP, ed. UK: NHS; 2017:39.  
36  
37 895 109. Services AH. Cancer SCN Quarterly Update. July to September 2018. In. Canada:  
38 896 Alberta Health Services; 2018.  
39  
40 897 110. Stacey C, D S, M E, K S, A T. Implementing new models and standards for earlier and  
41 898 faster diagnosis of cancer. Paper presented at: Health and Care Innovation Expo2018;  
42 899 Manchester, UK.  
43  
44 900 111. Inzetta SL, Musarra LL. Breast Care ACCESS Project. *Oncology Issues*. 2018;33:34-45.  
45  
46  
47  
48  
49  
50  
51  
52  
53  
54  
55  
56 901

**Table 1:** Summary of the characteristics of the included published articles that reported data on effective interventions

| Intervention                                         | Article                        | Study country (Region)    | Study type (Study years)     | Cancer type (Population) [Sample size]    | Assessment metric                                    | Results                                                                                                                                                                                                                                                                              |
|------------------------------------------------------|--------------------------------|---------------------------|------------------------------|-------------------------------------------|------------------------------------------------------|--------------------------------------------------------------------------------------------------------------------------------------------------------------------------------------------------------------------------------------------------------------------------------------|
| <b>Centralized or coordinated diagnostic service</b> | Christensen 2020 <sup>18</sup> | Denmark (Odense)          | Cross-sectional (2016-2017)  | Lung (Adult) [20]                         | Patients' perspective, experiences, and expectations | Although patients experienced anxiety with the fast-track diagnostic pathway, they still wanted to move through with diagnosis as quickly as possible (Effective)                                                                                                                    |
|                                                      | Common 2018 <sup>21</sup>      | Canada (Newfoundland)     | Case-Control (2015-2016)     | Lung (Adult) [133]                        | Time from first abnormal image to biopsy             | There was a statistically significant decline in wait times for patients from 61.5 to 36.0 days ( $p < 0.0001$ ) (Effective)                                                                                                                                                         |
|                                                      | Evison 2020 <sup>30</sup>      | UK (Manchester)           | Before-and-After (2016-2019) | Lung (Adult) [1035]                       | Mean time from referral to CT                        | The median time from referral to CT was 3 days. Overall 56% and 90% of patients had completed a CT and consultation within 3 and 7 days of referral, respectively (0% and 24% prior to implementation) (Effective)                                                                   |
|                                                      | Ezer 2017 <sup>31</sup>        | Canada (Montreal)         | Case-Control (2010-2011)     | Lung (Adult) [327 (195 RIC; 132 non-RIC)] | Time from first contact with physician to diagnosis  | Time from first contact to pathological diagnosis was shorter (median (M) 26 days; IQR 14–42 days) vs. control patients (M 40 days; IQR 16–68 days) (Effective)                                                                                                                      |
|                                                      | Jiang 2018 <sup>42</sup>       | Canada (Ontario)          | Case-Control (2011)          | Breast (Adult) [4381]                     | Time to diagnosis                                    | The Canadian timeliness targets (time from patients' first referral or test to the cancer diagnosis) were achieved more often than for usual care (71.7% vs. 58.1%, respectively), with associated 10-day (95% CI: 7.8–11.9) reduction in the median diagnostic interval (Effective) |
|                                                      | McKevitt 2017 <sup>52</sup>    | Canada (British Columbia) | Case-Control (2009)          | Breast (NR) [373]                         | Diagnostic wait time                                 | Patients had a decreased time to surgical consultation (33 vs 86 days, $p < 0.0001$ ) for both malignant (36 vs 59 days, $p = 0.0007$ ) and benign diagnoses (31 vs 95 days, $p < 0.0001$ ) (Effective)                                                                              |

1  
2  
3  
4  
5  
6  
7  
8  
9  
10  
11  
12  
13  
14  
15  
16  
17  
18  
19  
20  
21  
22  
23  
24  
25  
26  
27  
28  
29  
30  
31  
32  
33  
34  
35  
36  
37  
38  
39  
40  
41  
42  
43  
44  
45  
46  
47

| <b>Intervention</b>                                 | <b>Article</b>                | <b>Study country (Region)</b>        | <b>Study type (Study years)</b> | <b>Cancer type (Population) [Sample size]</b>                       | <b>Assessment metric</b>                                            | <b>Results</b>                                                                                                                                                                                                                                                             |
|-----------------------------------------------------|-------------------------------|--------------------------------------|---------------------------------|---------------------------------------------------------------------|---------------------------------------------------------------------|----------------------------------------------------------------------------------------------------------------------------------------------------------------------------------------------------------------------------------------------------------------------------|
|                                                     | McKevitt 2018 <sup>53</sup>   | Canada (Vancouver)                   | Case-Control (2012)             | Breast (NR) [176 (40 RABC; 136 TS)]                                 | Time from presentation to surgical consultation                     | Time from presentation to surgeon evaluation was shorter in the RABC group for patients with breast symptoms (81 vs 35 days, p < .0001) (Effective)                                                                                                                        |
|                                                     | Moodley 2018 <sup>54</sup>    | South Africa (Western Cape province) | Cross-sectional (2015-2016)     | Breast (Adult) [201]                                                | Time between first health care provider visit and date of diagnosis | The median time between the first health care visit and a breast cancer diagnosis was 28 days (IQR 13–58 days). Women whose initial reaction was denial of the breast symptom had a significantly shorter diagnostic interval (11 days vs. 29 days, p = 0.010) (Effective) |
|                                                     | Williams 2018 <sup>91</sup>   | New Zealand (Northland district)     | Before-and-After (2015-2016)    | Lung (Adult) [212 (70 in phase 1, 46 in phase 2 and 71 in phase 3)] | Time from GP referral to first specialist appointment               | Time from GP referral to first specialist appointment improved significantly (p=0.005) (Effective)                                                                                                                                                                         |
| <b>Intervention</b>                                 | <b>Article</b>                | <b>Study country (Region)</b>        | <b>Study type (Study years)</b> | <b>Cancer type (Population) [Sample size]</b>                       | <b>Assessment metric</b>                                            | <b>Results</b>                                                                                                                                                                                                                                                             |
| <b>Interventions to enhance diagnostic services</b> | Chapman 2020 <sup>15</sup>    | UK (Nottingham)                      | Cross-sectional (2017-2018)     | Gastrointestinal (Adult) [1934]                                     | Colorectal cancer (CRC) detection rate after a FIT                  | The symptomatic pathway incorporating FIT was feasible and appeared more clinically effective than pathways based on age and symptoms alone, with FIT results identifying patients with a significantly higher risk of CRC (Effective)                                     |
|                                                     | Cotton 2020 <sup>22</sup>     | Canada (Ontario)                     | Before-and-After (2017-2018)    | Lung (NR) [NR]                                                      | Referral to diagnosis                                               | Monthly patient volumes increased by 65%, and wait time improved by 60% (Effective)                                                                                                                                                                                        |
|                                                     | Laudicella 2018 <sup>50</sup> | UK (England)                         | Case-Control (2006-2009)        | Multiple (Adult) [372353]                                           | Survival of patients                                                | Rerouting patients from emergency presentation to new referral resulted in better patient survival in all cancer cohorts (Effective)                                                                                                                                       |

| Intervention | Article                        | Study country (Region)        | Study type (Study years)     | Cancer type (Population) [Sample size] | Assessment metric                                                      | Results                                                                                                                                                                                                               |
|--------------|--------------------------------|-------------------------------|------------------------------|----------------------------------------|------------------------------------------------------------------------|-----------------------------------------------------------------------------------------------------------------------------------------------------------------------------------------------------------------------|
|              | Nixon 2020 <sup>62</sup>       | Canada (Ontario)              | Case-Control (2015-2017)     | Haematological (Adult) [126]           | Time from initial consultation to diagnosis of lymphoma                | Median time to lymphoma diagnosis was 16 days for patients assessed in the nurse practitioner-led lymphoma rapid diagnosis clinic and 28 days for historical controls (P<0.001) (Effective)                           |
|              | Sardi 2019 <sup>73</sup>       | Colombia (Cali)               | Before-and-After (2012-2016) | Multiple (NR) [114]                    | Time from initial consultation to biopsy                               | The average time from initial consult to biopsy decreased from 65 to 20 days and from biopsy to diagnosis from 33 to 4 days (Effective)                                                                               |
|              | Setyowibowo 2020 <sup>75</sup> | Indonesia (Bandung West Java) | RCT (2017)                   | Breast (Adult) [107]                   | Time between first visit to the hospital and a definitive diagnosis    | The intervention reduced the time to definitive diagnosis; mean difference = -13.26, 95% CI = -24.51 to -2.00, P=0.02) (Effective)                                                                                    |
|              | Skevington 2020 <sup>76</sup>  | UK (Manchester)               | RCT (2015-2016)              | Multiple (Adult) [107]                 | Quality of life                                                        | Psychological quality of life increased (Effective)                                                                                                                                                                   |
|              | Stenman 2019 <sup>78</sup>     | Sweden (Kristianstad)         | Cross-sectional (2015)       | Multiple (Adult) [290]                 | Total diagnostic interval                                              | Shorter diagnostic interval (time from referral decision in primary care to diagnosis). The median primary care interval was 21 days, and the median diagnostic interval was 11 days (Effective)                      |
|              | Tafari 2020 <sup>81</sup>      | USA (NR)                      | Case-Control (2016-2018)     | Prostate (Adult) [370]                 | Time from multiparametric Magnetic Resonance Imaging (mpMRI) to biopsy | One-Stop patients experienced shorter time from mpMRI to biopsy (0 vs 7 days; p< 0.01) (Effective)                                                                                                                    |
|              | Williams 2019 <sup>92</sup>    | Botswana (Gaborone)           | Before-and-After (2015-2017) | Skin (Adult) [218]                     | Diagnostic histology turnaround times                                  | Median turnaround in the post dermatology quality improvement interval was 11 days (IQR, 12-23 days) compared with 32 days in the pre-dermatology quality improvement interval (IQR, 24-56 days; P<0.001) (Effective) |

| Intervention                  | Article                            | Study country (Region)                       | Study type (Study years)     | Cancer type (Population) [Sample size] | Assessment metric                                                         | Results                                                                                                                                                                                          |                                                                                                                                                                                                            |
|-------------------------------|------------------------------------|----------------------------------------------|------------------------------|----------------------------------------|---------------------------------------------------------------------------|--------------------------------------------------------------------------------------------------------------------------------------------------------------------------------------------------|------------------------------------------------------------------------------------------------------------------------------------------------------------------------------------------------------------|
| <b>Multidisciplinary team</b> | Phillips 2019 <sup>66</sup>        | USA (NR)                                     | Case-Control (2014-2016)     | Lung (NR) [218]                        | Time to diagnosis                                                         | Compared to controls, patients with lung cancer in the Lung Cancer Strategist Program cohort had an expedited time from suspicious finding to diagnosis (34 vs 44 days, p=0.027) (Effective)     |                                                                                                                                                                                                            |
|                               | Chavarri-Guerra 2019 <sup>16</sup> | Mexico (Mexico City)                         | Before-and-After (2016-2017) | Multiple (Adult) [70]                  | Feasibility                                                               | 91% of patients successfully obtained appointments at cancer centers in <3 months (Effective)                                                                                                    |                                                                                                                                                                                                            |
|                               | Drudge-Coates 2019 <sup>26</sup>   | UK (London)                                  | Before-and-After (2012-2015) | Prostate (Adult) [60]                  | Waiting times from the GP referral to initial clinic assessment           | Compared with the previous physician-led service, waiting times for patient appointment fell by 52% over a 3-year study period (Effective)                                                       |                                                                                                                                                                                                            |
| <b>Patient navigation</b>     | Whitley 2017 <sup>90</sup>         | USA (Boston, Denver, San Antonio, and Tampa) | Case-Control (2007-2011)     | Multiple (Adult) [6349]                | Delays in diagnostic resolution based on Charlson Comorbidity Index score | Patient navigation reduced delays in diagnostic resolution, with the greatest benefits seen for those with a Charlson Comorbidity Index score ≥2 (Effective)                                     |                                                                                                                                                                                                            |
|                               | Intervention                       | Article                                      | Study country (Region)       | Study type (Study years)               | Cancer type (Population) [Sample size]                                    | Assessment metric                                                                                                                                                                                | Results                                                                                                                                                                                                    |
|                               | <b>Rapid referral pathway</b>      | Antel 2020 <sup>11</sup>                     | South Africa (Cape Town)     | Before-and-After (2017-2019)           | Haematological (Adult) [130]                                              | Diagnostic interval                                                                                                                                                                              | Compared with a historical cohort, the diagnostic interval (time from first health visit to diagnostic biopsy) for patients with lymphoma was significantly shorter, 13.5 vs 48 days (p=0.002) (Effective) |
| Arhi 2020 <sup>12</sup>       |                                    | UK (National)                                | Case-Control (2000-2013)     | Gastrointestinal (Adult) [7130]        | Hazard ratios of death                                                    | Patients referred between 2 weeks to 3 months, and after 3 months with red-flag symptoms demonstrated a significantly worse prognosis than patients who were referred within 2 weeks (Effective) |                                                                                                                                                                                                            |
| Chng 2020 <sup>17</sup>       |                                    | UK (Newcastle-upon-Tyne)                     | Case-Control (2015-2019)     | Brain (Adult) [101]                    | Tumour detection rate                                                     | With guideline adherence, the brain tumour detection rate was 3-fold higher (36.0% vs 11.5%, p=0.02) (Effective)                                                                                 |                                                                                                                                                                                                            |

| Intervention | Article                     | Study country (Region) | Study type (Study years)    | Cancer type (Population) [Sample size]                                               | Assessment metric                             | Results                                                                                                                                                                                                                                                         |
|--------------|-----------------------------|------------------------|-----------------------------|--------------------------------------------------------------------------------------|-----------------------------------------------|-----------------------------------------------------------------------------------------------------------------------------------------------------------------------------------------------------------------------------------------------------------------|
|              | Creak 2020 <sup>23</sup>    | UK (Brighton; Sussex)  | Cross-sectional (2015-2018) | Multiple (Adult) [258]                                                               | Time to diagnosis                             | Direct GP referrals were feasible and manageable within a tertiary clinic and resulted in high rates of cancer diagnoses and early contact with an oncologist and nurse specialist, cutting short the 'limbo' time of high anxiety before diagnosis (Effective) |
|              | Hennessy 2020 <sup>34</sup> | Ireland (Dublin)       | Case-Control (2012-2018)    | Lung (NR) [864]                                                                      | Time to diagnosis                             | Time to diagnosis was longer in those who had attended a post Rapid Access Lung Cancer Clinic CT (34.5 versus 21 days) (Effective)                                                                                                                              |
|              | Jones 2018 <sup>43</sup>    | UK (East Midlands)     | Case-Control (2013-2015)    | Gastrointestinal (NR) [1401 (340 STTP, 495 traditional pathway, 566 control trusts)] | Time from referral to diagnosis               | The pathway saved a mean of 7 days from referral to treatment (with a 95% CI of 3 to 11 days, p<0.008) and a mean of 16 days from referral to diagnosis, when compared with a traditional pathway (Effective)                                                   |
|              | Joyce 2020 <sup>44</sup>    | UK (National)          | Cross-sectional (2017-2018) | Multiple (Mixed age) [NR]                                                            | Proportion with emergency diagnosis of cancer | A lower proportion of emergency diagnosis of cancer was found with higher 2 weeks wait referral conversion rate (Effective)                                                                                                                                     |
|              | Pearson 2020 <sup>65</sup>  | UK (National)          | Case-Control (2014)         | Multiple (Mixed age) [12873]                                                         | Primary care interval                         | Compared with patients with a specific alarm symptom, patients with non-specific but concerning symptoms had higher odds of having longer primary care intervals (adjusted OR: 1.24 (1.11 to 1.36)) (Effective)                                                 |
|              | Round 2020 <sup>70</sup>    | UK (National)          | Case-Control (2011-2017)    | Multiple (Mixed age) [1469103]                                                       | Risk of death                                 | Cancer patients from the highest referring practices had a lower hazard of death (hazard ratio [HR] = 0.96; 95% confidence interval [CI] = 0.95 to 0.97) (Effective)                                                                                            |
|              | Sandager 2019 <sup>72</sup> | Denmark (National)     | Cross-sectional (2010)      | Multiple (Adult) [2256]                                                              | Patient experience                            | Overall, pathway referred patients were 21% more likely than non-pathway referred patients to report a                                                                                                                                                          |

| Intervention                     | Article                         | Study country (Region) | Study type (Study years)     | Cancer type (Population) [Sample size] | Assessment metric                                                                 | Results                                                                                                                                                                                                                                                                                      |
|----------------------------------|---------------------------------|------------------------|------------------------------|----------------------------------------|-----------------------------------------------------------------------------------|----------------------------------------------------------------------------------------------------------------------------------------------------------------------------------------------------------------------------------------------------------------------------------------------|
|                                  |                                 |                        |                              |                                        |                                                                                   | positive experience (PR = 1.21 [95% CI: 1.11–1.30]) (Effective)                                                                                                                                                                                                                              |
|                                  | Thanapal 2020 <sup>84</sup>     | UK (London)            | Before-and-After (2012-2018) | Gastrointestinal (Adult) [1648]        | Time to diagnosis                                                                 | Patients on the pathway took 25 days to obtain results as compared to 40 days in the standard pathway (Effective)                                                                                                                                                                            |
|                                  | Vijayakumar 2020 <sup>88</sup>  | UK (Buckinghamshire)   | Cross-sectional (2018)       | Lung (NR) [111]                        | Patient satisfaction                                                              | High satisfaction with the service, with scores above 93% in all parameters (Effective)                                                                                                                                                                                                      |
|                                  |                                 |                        |                              |                                        |                                                                                   |                                                                                                                                                                                                                                                                                              |
| Intervention                     | Article                         | Study country (Region) | Study type (Study years)     | Cancer type (Population) [Sample size] | Assessment metric                                                                 | Results                                                                                                                                                                                                                                                                                      |
| <b>Standardized care pathway</b> | Alonso-Abreu 2017 <sup>10</sup> | Spain (Tenerife)       | Case-Control (2008-2010)     | Gastrointestinal (Adult) [257]         | Survival rates                                                                    | Survival rates at 12 and 60 months after treatment were significantly higher in the early colonoscopy group compared with the standard schedule colonoscopy group (p < 0.001) (Effective)                                                                                                    |
|                                  | Dahl 2017 <sup>24</sup>         | Denmark (Countrywide)  | Before-and-After (2004-2010) | Multiple (Adult) [3292]                | Patient satisfaction for waiting time from referral to consultation at a hospital | Implementation of pathway was associated with a reduced level of patient-reported dissatisfaction with long waiting time from the time of referral to the first consultation at the hospital (Effective)                                                                                     |
|                                  | Laerum 2020 <sup>47</sup>       | Norway (Kristiansand)  | Before-and-After (2007-2016) | Lung (Adult) [780]                     | Referral interval                                                                 | The median referral interval among all patients was reduced by two days from baseline to the next time period when the local diagnostic algorithm was streamlined (Effective)                                                                                                                |
|                                  | Mullin 2020 <sup>57</sup>       | Canada (Ontario)       | Before-and-After (2018-2019) | Lung (NR) [833]                        | Time from referral to diagnosis                                                   | Time from referral to positron emission tomography decreased (from 38.5 to 15.7 days), time from referral to brain imaging decreased (from 33.4 to 13.1 days), and time from referral to diagnosis decreased (from 38.0 to 22.7 days), all demonstrating special-cause variation (Effective) |



| Intervention                              | Article                             | Study country (Region)      | Study type (Study years)     | Cancer type (Population) [Sample size] | Assessment metric                                                | Results                                                                                                                                                                                                         |
|-------------------------------------------|-------------------------------------|-----------------------------|------------------------------|----------------------------------------|------------------------------------------------------------------|-----------------------------------------------------------------------------------------------------------------------------------------------------------------------------------------------------------------|
|                                           | Nilbert 2018 <sup>61</sup>          | Sweden (Skane County)       | Case-Control (2015-2016)     | Urinary tract (Adult) [1871]           | Time from sign/symptom to diagnosis                              | The standardized care pathway shortened the diagnostic delay to a median of 25 days compared to 35 days for regular referral ( $p=0.01$ ) (Effective)                                                           |
|                                           | Rankin 2017 <sup>69</sup>           | Australia (New South Wales) | Cross-sectional (2014)       | Lung (Adult) [19]                      | Patient concerns urgency, advocacy, and referral                 | Patients and general practitioners expressed similar themes across the diagnostic and pretreatment intervals (Effective)                                                                                        |
| Intervention                              | Article                             | Study country (Region)      | Study type (Study years)     | Cancer type (Population) [Sample size] | Assessment metric                                                | Results                                                                                                                                                                                                         |
| <b>Target or benchmark for wait times</b> | Jeyakumar 2020 <sup>40</sup>        | Australia (Victoria)        | Case-Control (2018)          | Lung (Adult) [46]                      | Mean time from initial CT to tissue diagnosis                    | The Standard Care group met the target for treatment commencement in 33.3% of cases whereas the Rapid Access Clinic group achieved this in 77% (Effective)                                                      |
|                                           | Jiang 2017 <sup>41</sup>            | China (Shanghai)            | Case-Control (2011-2015)     | Lung (NR) [4000]                       | Time from initial respiratory consultation to treatment decision | Takes a median 4 workdays (range 3 to 6) for a new patient from initial respiratory consultation to treatment decision, whereas in many countries, 14 workdays are considered a reasonable timeline (Effective) |
|                                           | Sagar 2020 <sup>71</sup>            | UK (Milton, Somerset)       | Before-and-After (2019-2020) | Gastrointestinal (Mixed age) [1255]    | 28-day target attainment                                         | Attainment of the 28-day diagnosis target for all suspected colorectal cancer referrals improved following the establishment of a new pathway (88% vs. 82%, $P < 0.0001$ ) (Effective)                          |
|                                           | Stevenson-Hornby 2018 <sup>79</sup> | UK (Wigan)                  | Before-and-After (2017)      | Gastrointestinal (NR) [NR]             | Percentage diagnosed                                             | 55% of all referrals were found to have hepatobiliary-pancreatic cancer after pathway trial compared with 19% before (Effective)                                                                                |
|                                           | Zhu 2020 <sup>94</sup>              | Sweden (Orebro)             | RCT (2015-2018)              | Prostate (Adult) [204]                 | Self-reported symptoms of stress                                 | Significant changes in depression symptoms and self-rated sleep quality suggested a benefit of the fast-track workup intervention (Effective)                                                                   |



1  
2  
3  
4  
5  
6  
7  
8  
9  
10  
11  
12  
13  
14  
15  
16  
17  
18  
19  
20  
21  
22  
23  
24  
25  
26  
27  
28  
29  
30  
31  
32  
33  
34  
35  
36  
37  
38  
39  
40  
41  
42  
43  
44  
45  
46  
47

| Intervention                                   | Article                      | Study country (Region)   | Study type (Study years)          | Cancer type (Population) [Sample size]           | Assessment metric                                                         | Results                                                                                                                                                                                                                                                                                                                       |
|------------------------------------------------|------------------------------|--------------------------|-----------------------------------|--------------------------------------------------|---------------------------------------------------------------------------|-------------------------------------------------------------------------------------------------------------------------------------------------------------------------------------------------------------------------------------------------------------------------------------------------------------------------------|
|                                                | *Piano 2019 <sup>67</sup>    | UK (Guildford, Bradford) | Cross-sectional (NR)              | Multiple (Adult) [29]                            | Patient attitudes within the context of their recent referral experiences | Most patients had experienced swift referral. It was difficult for patients to understand how the new standard could affect upon the time that it takes to progress through the system. Responsibility for meeting the standard was also a concern as patients did not see their own behaviours as a form of Involvement (NA) |
| Intervention                                   | Article                      | Study country (Region)   | Study type (Study years)          | Cancer type (Population) [Sample size]           | Assessment metric                                                         | Results                                                                                                                                                                                                                                                                                                                       |
| <b>Technology to support diagnosis process</b> | Cazzaniga 2019 <sup>14</sup> | Italy (Bergamo)          | Case-Control (2017)               | Skin (Adult) [232]                               | Diagnostic accuracy                                                       | The diagnostic accuracy of the online assessment compared with direct clinical examination was significant (Effective)                                                                                                                                                                                                        |
|                                                | Cock 2017 <sup>20</sup>      | UK (NR)                  | Guideline development (2014-2016) | Gastrointestinal (Adult) [NR]                    | Patient satisfaction                                                      | Audits were being conducted to assess and compare patient satisfaction with face-to-face versus telephone assessments, although intervention was well-received (Effective)                                                                                                                                                    |
|                                                | Eastham 2017 <sup>27</sup>   | UK (Leeds)               | Before-and-After (2015-2016)      | Multiple (Adult) [NR]                            | Form completion rates and time spent processing forms                     | Form completion rates improved from a mean of 44% of forms at baseline (n = 210) to 99% post-intervention n = 236). Time spent processing forms also decreased from a mean of 96 seconds to 35 seconds post-introduction of the new system (Effective)                                                                        |
|                                                | Hirst 2018 <sup>35</sup>     | UK (London)              | Cross-sectional (2016)            | Multiple (Adult) [NR]                            | GP perspectives on txt-netting                                            | Text messages were perceived to be an acceptable potential strategy for safety netting patients with low-risk cancer symptoms (Effective)                                                                                                                                                                                     |
|                                                | Hunt 2020 <sup>36</sup>      | UK (England)             | Case-Control (2018)               | Skin (Adult) [150 (75 consecutive TD referrals)] | Time from referral to first appointment and diagnostic rates              | There was a 23% absolute and 37% relative increase in diagnostic completion rates in the mobile van                                                                                                                                                                                                                           |

| Intervention | Article                           | Study country (Region)               | Study type (Study years)     | Cancer type (Population) [Sample size]           | Assessment metric               | Results                                                                                                                                                                                                                                                                             |
|--------------|-----------------------------------|--------------------------------------|------------------------------|--------------------------------------------------|---------------------------------|-------------------------------------------------------------------------------------------------------------------------------------------------------------------------------------------------------------------------------------------------------------------------------------|
|              |                                   |                                      |                              | paired with 75 standard "Face to Face" controls] |                                 | compared with the central hospital facility (p=0.0001) (Effective)                                                                                                                                                                                                                  |
|              | Moor 2019 <sup>55</sup>           | UK (Newcastle-upon-Tyne; Birmingham) | Case-Control (2007-2010)     | Head and Neck (Mixed age) [4715]                 | Diagnostic accuracy             | Machine learning algorithms accurately and effectively classify patients referred with suspected head and neck cancer symptoms (Effective)                                                                                                                                          |
|              | Moreno-Ramirez 2017 <sup>56</sup> | Spain (Southern region)              | Case-Control (2004-2015)     | Skin (NR) [2009]                                 | Waiting times for referral      | Waiting times for referral for teledermatology network versus conventional letter referral system 12.31 (8.22–16.40) vs 88.62 (38.42–138.82) (Effective)                                                                                                                            |
|              | Nicholson 2020 <sup>60</sup>      | UK (London)                          | Cross-sectional (2018-2019)  | Skin (NR) [60]                                   | Patient satisfaction            | Over 80% (49) would recommend the service, and the majority felt confident with the teledermatology model. Overall, patients would be happy to complete electronic questionnaires and receive results electronically, with younger patients being more amenable to this (Effective) |
|              | Orchard 2020 <sup>63</sup>        | UK (Bristol)                         | Before-and-After (2014-2017) | Gastrointestinal (Mixed age) [11357]             | Time from referral to diagnosis | Time from referral to diagnosis reduced from 39 to 21 days and led to a dramatic improvement in patients starting treatment within 62 days (Effective)                                                                                                                              |
|              | Snoswell 2018 <sup>77</sup>       | New Zealand (Countrywide)            | Not clear (2012)             | Skin (Adult) [300]                               | Time to clinical resolution     | Mean time to clinical resolution was 9 days (range, 1-50 days) with teledermoscopy referral compared with 35 days (range, 0-138 days) with usual care alone (difference, 26 days; 95%credible interval 13-38 days) (Effective)                                                      |
|              | Sunderland 2020 <sup>80</sup>     | New Zealand (Auckland)               | Case-Control (2016)          | Skin (NR) [809]                                  | Efficacy of diagnostic tool     | A positive predictive value (PPV) of 38.1% and number needed to excise (NNE) of 2.6, with less than 10% of referrals triaged for teledermatology                                                                                                                                    |

1  
2  
3  
4  
5  
6  
7  
8  
9  
10  
11  
12  
13  
14  
15  
16  
17  
18  
19  
20  
21  
22  
23  
24  
25  
26  
27  
28  
29  
30  
31  
32  
33  
34  
35  
36  
37  
38  
39  
40  
41  
42  
43  
44  
45  
46  
47

| Intervention | Article                        | Study country (Region)     | Study type (Study years) | Cancer type (Population) [Sample size] | Assessment metric                                                | Results                                                                                                                           |
|--------------|--------------------------------|----------------------------|--------------------------|----------------------------------------|------------------------------------------------------------------|-----------------------------------------------------------------------------------------------------------------------------------|
|              |                                |                            |                          |                                        |                                                                  | confirmed as melanoma (24/264) (Effective)                                                                                        |
|              | Uthoff 2018 <sup>85</sup>      | India (Bangalore, Dimapur) | Case-Control (NR)        | Oral (Adult) [99]                      | Diagnostic accuracy                                              | Sensitivities, specificities, positive predictive values, and negative predictive values ranged from 81.25% to 94.94% (Effective) |
|              | Vestergaard 2020 <sup>87</sup> | Denmark (Southern Denmark) | Case-Control (2018)      | Skin (Adult) [519]                     | Percentage of lesions not requiring further in-person assessment | On evaluation by teledermoscopy, 31.5% of lesions did not need further in-person assessment (Effective)                           |

CRC = colorectal cancer; CT = computed tomography; FIT = faecal immunochemical testing; GP = general practitioner; NR = not reported; RABC = rapid access breast clinic; RCT = randomized controlled trial; RIC = rapid investigation clinic; STTP = straight to test pathway; TD = teledermatology; TS = traditional system; UK = United Kingdom; USA = United States of America; \* = effective but not applicable; IQR = interquartile range

1  
2  
3 **Figures**  
4  
5  
6

7 **Figure 1:** Modified PRISMA flow chart  
8  
9

10 **Figure 2:** Geographical mapping of the included published articles  
11  
12

13  
14 **Figure 3:** Summary of cancer types reported by the included published articles  
15  
16

17  
18 **Figure 4:** Summary of intervention types reported by the included published articles  
19  
20  
21  
22  
23  
24  
25  
26  
27  
28  
29  
30  
31  
32  
33  
34  
35  
36  
37  
38  
39  
40  
41  
42  
43  
44  
45  
46  
47  
48  
49  
50  
51  
52  
53  
54  
55  
56  
57  
58  
59  
60

1  
2  
3  
4  
5  
6  
7  
8  
9  
10  
11  
12  
13  
14  
15  
16  
17  
18  
19  
20  
21  
22  
23  
24  
25  
26  
27  
28  
29  
30  
31  
32  
33  
34  
35  
36  
37  
38  
39  
40  
41  
42  
43  
44  
45  
46  
47  
48  
49  
50  
51  
52  
53  
54  
55  
56  
57  
58  
59  
60

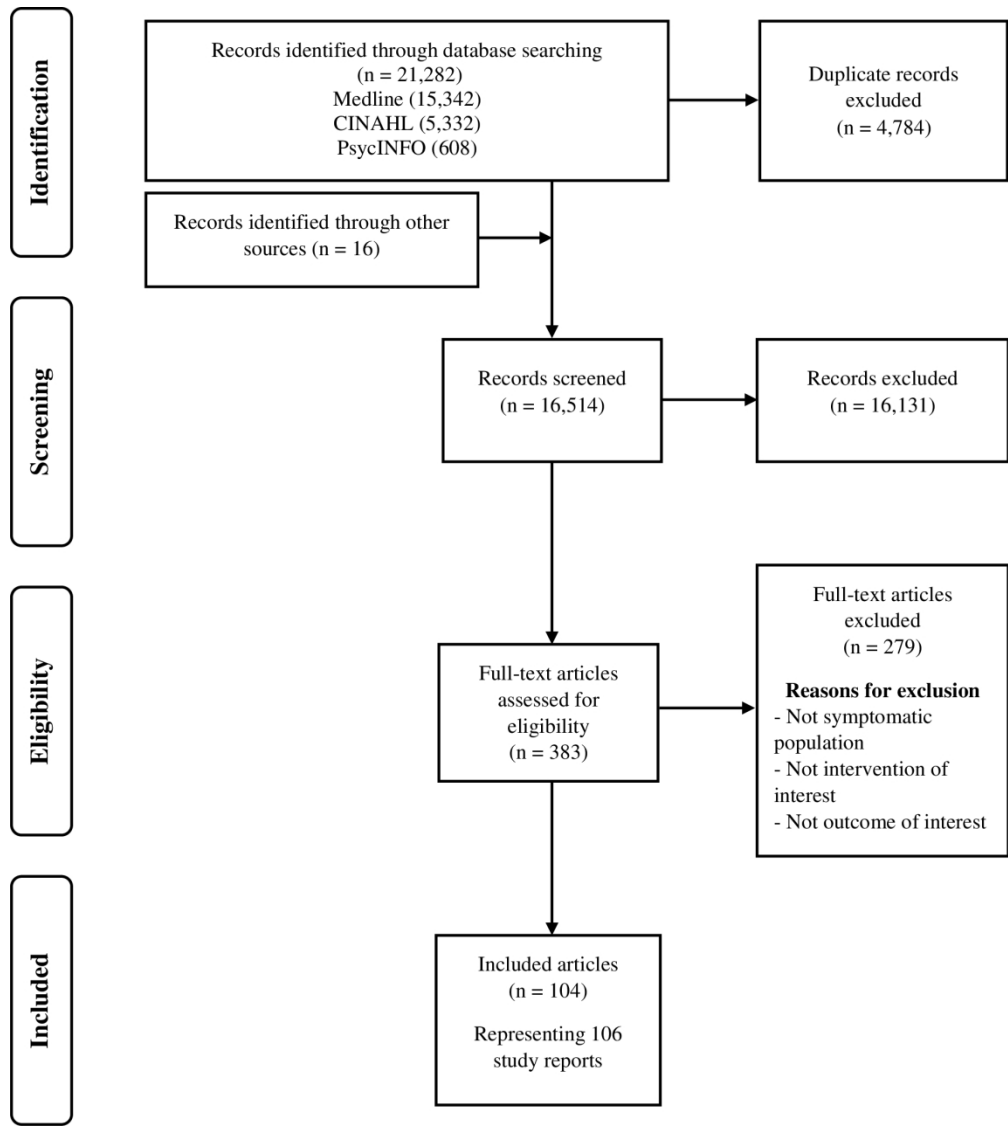

166x186mm (300 x 300 DPI)

1  
2  
3  
4  
5  
6  
7  
8  
9  
10  
11  
12  
13  
14  
15  
16  
17  
18  
19  
20  
21  
22  
23  
24  
25  
26  
27  
28  
29  
30  
31  
32  
33  
34  
35  
36  
37  
38  
39  
40  
41  
42  
43  
44  
45  
46  
47  
48  
49  
50  
51  
52  
53  
54  
55  
56  
57  
58  
59  
60

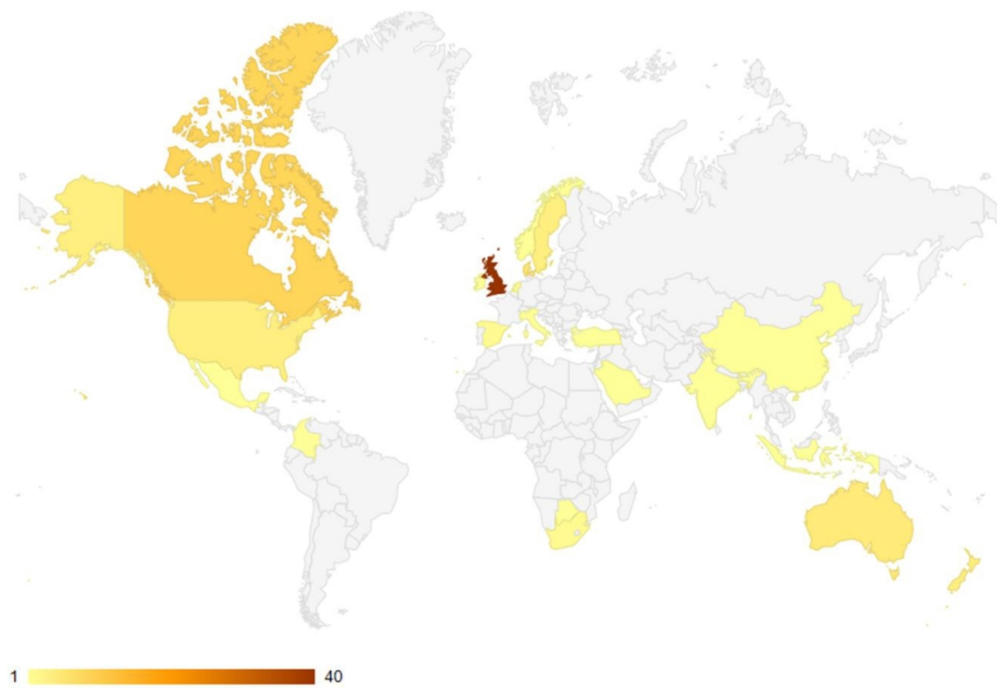

159x108mm (300 x 300 DPI)

1  
2  
3  
4  
5  
6  
7  
8  
9  
10  
11  
12  
13  
14  
15  
16  
17  
18  
19  
20  
21  
22  
23  
24  
25  
26  
27  
28  
29  
30  
31  
32  
33  
34  
35  
36  
37  
38  
39  
40  
41  
42  
43  
44  
45  
46  
47  
48  
49  
50  
51  
52  
53  
54  
55  
56  
57  
58  
59  
60

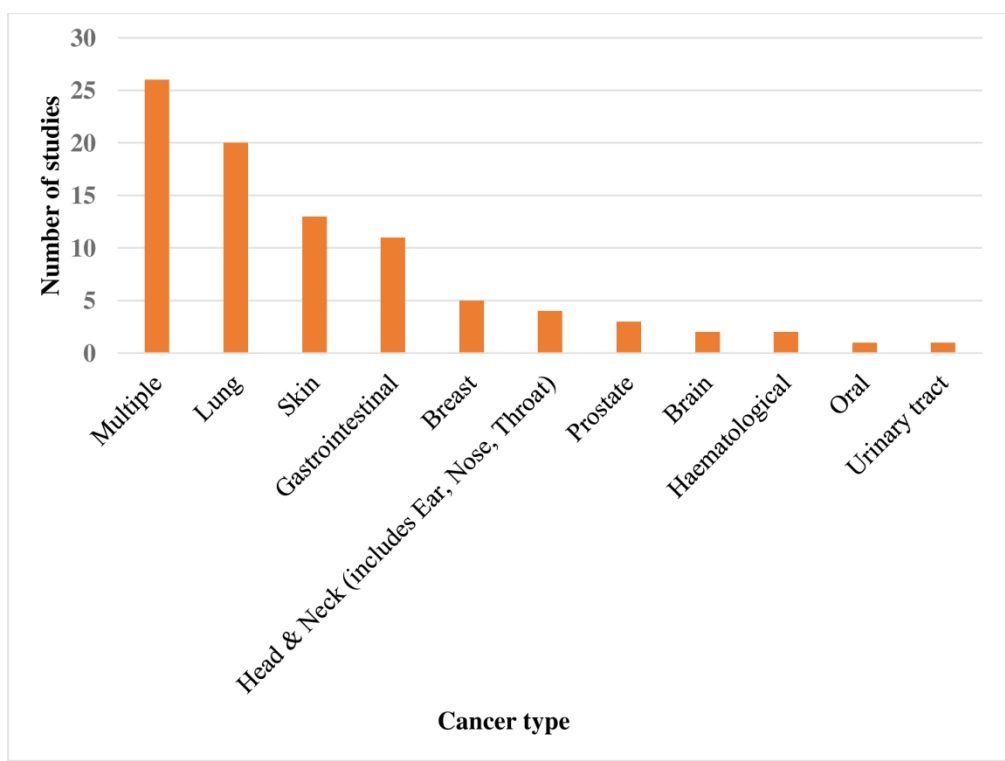

165x123mm (300 x 300 DPI)

1  
2  
3  
4  
5  
6  
7  
8  
9  
10  
11  
12  
13  
14  
15  
16  
17  
18  
19  
20  
21  
22  
23  
24  
25  
26  
27  
28  
29  
30  
31  
32  
33  
34  
35  
36  
37  
38  
39  
40  
41  
42  
43  
44  
45  
46  
47  
48  
49  
50  
51  
52  
53  
54  
55  
56  
57  
58  
59  
60

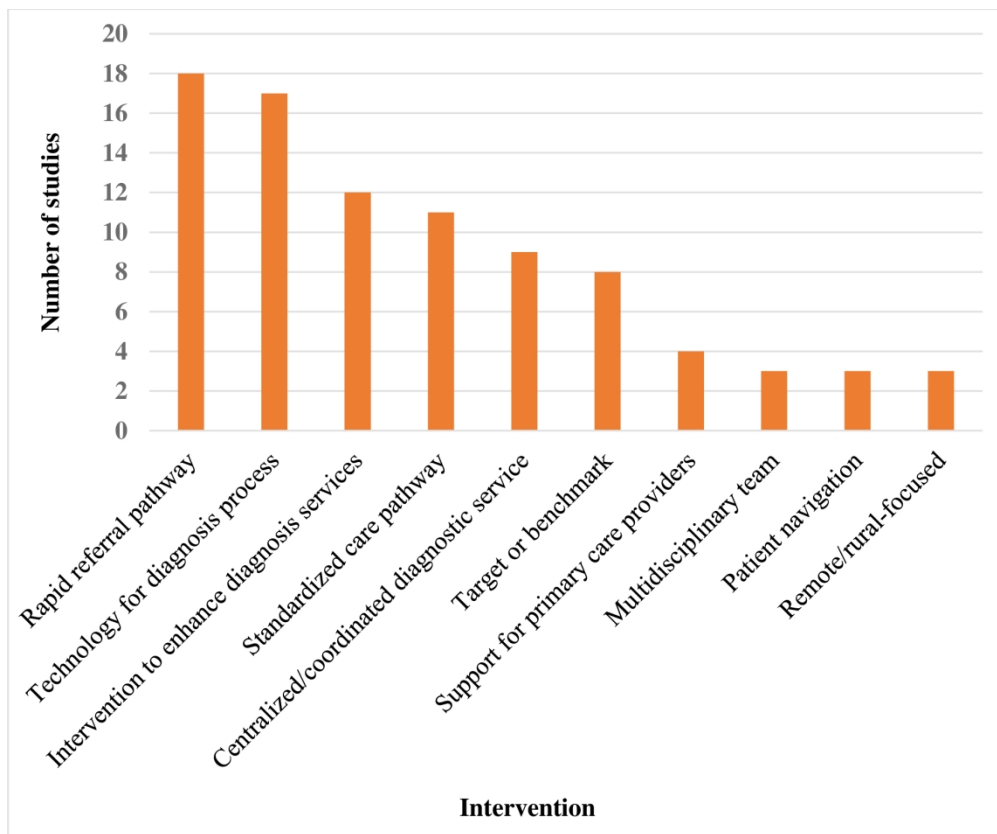

165x137mm (300 x 300 DPI)



## Appendices

### Appendix 1: Project work plan

#### About the Project Team

At the Knowledge Synthesis Team, George and Fay Yee Centre for Healthcare Innovation, we have an experienced team of methodologists, systematic reviewers, a medical librarian and biostatistician. Over the past 8 years we have supported numerous research teams and guideline developers by providing training, support and conducting evidence syntheses on their behalf. In addition, several of our team members hold academic positions with the University of Manitoba where they teach, supervise students, and advance the science and practice of knowledge synthesis.

#### Proposed Method

##### Methods

Using a team of experienced systematic reviews and methodologists, with expertise in research methodology, knowledge synthesis and implementation science, we will update the 2018 peer-reviewed and grey literature scan by conducting a rapid scoping review to include contemporary, national and international leading interventions for improving accurate and timely cancer diagnosis focusing on the symptomatic population and summarize efficacy, impact and sustainability of identified interventions. We will identify evidence to answer the following key questions:

KQ 1. Are there practice guidelines, care pathways or other initiatives (e.g., benchmarks/ targets for wait times, streamlined or rapid diagnostic services, multidisciplinary teams, patient navigators and/or navigation, etc.) that have been found to streamline and enhance accurate and timely diagnosis in symptomatic individuals?

- How were patients involved in the design, development and/ or implementation of these initiatives?
- How were providers (e.g., primary care providers) involved in the design, development and/or implementation of these initiatives?

KQ 2. What are the leading interventions for innovative and/or virtual approaches (e.g., technology-based) to seamless care (i.e., minimally disruptive care that is found to be more convenient/coordinated/timely/less stressful to the patients) in the pre-diagnosis phase within Canada and abroad?

- How have these interventions been applied, including identification of successes and lessons learned where possible?
- Were these interventions evaluated and if so, what were the findings?
- How were patients involved in the design, development and/ or implementation of these interventions?

KQ 3. What are the identified performance metrics that can be used to measure the suspicion to diagnosis phase; and where and how are these metrics used?

- Are there specific metrics used to measure the patient experience?
- What data is captured by decision-support systems and how does the data and clinical systems work together?
- Is there evidence on sustainability of the model?

KQ 4. What are the key points of care in a patient's experience (e.g., diagnostic tests, physician consultations, etc.) as they navigate the system from initial symptoms/ suspicion of cancer to diagnosis?

1  
2  
3  
4 KQ 5. Have specific considerations been applied to underserved populations including Indigenous,  
5 rural, and remote populations within the context of each of the questions above?  
6  
7

### 8 **Study eligibility criteria**

9 This review will focus on published and unpublished studies that answer the key questions since 2017.  
10 Our focus is on comparative studies that applied a protocol/guideline or a specific intervention or  
11 intervention plan. Having said that, we anticipate the need to review lower quality study designs (e.g.,  
12 retrospective, and uncontrolled studies). As such, there will be no restriction on the study design, but will  
13 be limited to English language publications for feasibility.  
14

### 15 **Search strategy and study selection**

16 A knowledge synthesis librarian has designed and executed a literature search strategy in MEDLINE  
17 (Ovid). The search strategy was peer-reviewed by a second librarian and adapted for other bibliographic  
18 databases: Cinahl (Ebsco) and Psycinfo (Ovid). Search strategies are presented in Appendix 1. All  
19 retrieved records were imported into EndNote for citation management.  
20 One reviewer will screen each identified citation for eligibility. Full texts of all relevant citations will be  
21 reviewed by two reviewers. All conflicts will be resolved by discussion and/ or a third reviewer, as  
22 needed. We will record the number of ineligible citations at the title/ abstract screening stage, and both  
23 the number and reason for ineligibility at the full-text articles.  
24

### 25 **Data extraction**

26 We will develop data extraction forms and pilot them on a small selection of studies. Extracted data will  
27 be stored and managed in MS Excel. One reviewer will independently extract data from included studies  
28 and another reviewer will independently check the extracted data for errors. Disagreements will be  
29 resolved by discussion between reviewers and/ or by involving a third reviewer, as needed.  
30

### 31 **Data analysis**

32 We will present specific characteristics of all included studies in a tabular form. The analysis of the  
33 extracted data will be descriptive. We will use appropriate risk of bias/ quality assessment tools based on  
34 the study designs identified in the search.  
35  
36

### 37 **Study dissemination**

38 We will submit reports from this study as a technical report to CPAC.  
39  
40

## 41 **Knowledge User Engagement Plan**

42 We will be providing a bi-weekly update to CPAC on the progression of the review. Specifically, we will  
43 engage during specific time points to review progress and next steps:  
44

- 45 - Protocol
- 46 - Level I Screening (Title/ Abstract screening phase)
- 47 - Level II Screening (Full-text screening phase)
- 48 - Data Extraction
- 49 - Data Analysis
- 50 - Report
- 51
- 52

## 53 **Declaration of Conflict of Interest**

54  
55  
56 None  
57

**Appendix 2: MEDLINE (Ovid) search strategy**

|     |                                                                                                                                                                                                                                                                                                                                                                                                                                                                                                                                                                                                                                                                                                                                                                               |         |
|-----|-------------------------------------------------------------------------------------------------------------------------------------------------------------------------------------------------------------------------------------------------------------------------------------------------------------------------------------------------------------------------------------------------------------------------------------------------------------------------------------------------------------------------------------------------------------------------------------------------------------------------------------------------------------------------------------------------------------------------------------------------------------------------------|---------|
| 1.  | "early detection of cancer"/                                                                                                                                                                                                                                                                                                                                                                                                                                                                                                                                                                                                                                                                                                                                                  | 26241   |
| 2.  | (cancer* or tumor* or neoplasm* or malignan* or metasta* or oncogen* or oncolog*).ti                                                                                                                                                                                                                                                                                                                                                                                                                                                                                                                                                                                                                                                                                          | 1795604 |
| 3.  | (carcinoma* or adenoma* or adenocarcinoma* or adeno-carcinoma* or blastoma* or carcinosarcoma* or carcino-sarcoma* or leukemia* or leukaemia* or lymphoma* or melanoma* or mesenchymoma* or mesothelioma* or sarcoma* or thymoma*).ti                                                                                                                                                                                                                                                                                                                                                                                                                                                                                                                                         | 844480  |
| 4.  | or/2-3                                                                                                                                                                                                                                                                                                                                                                                                                                                                                                                                                                                                                                                                                                                                                                        | 2477759 |
| 5.  | 1 or 4                                                                                                                                                                                                                                                                                                                                                                                                                                                                                                                                                                                                                                                                                                                                                                        | 2483642 |
| 6.  | early diagnosis/ or delayed diagnosis/                                                                                                                                                                                                                                                                                                                                                                                                                                                                                                                                                                                                                                                                                                                                        | 33272   |
| 7.  | (prediagnos* or pre-diagnos* or care path? or cancer path? or care pathway* or cancer pathway* or diagnos* phase* or diagnos* path? or referral path? or diagnos* pathway* or referral pathway* or diagnos* interval* or referral interval* or consult* interval* or "time-to-treat" or "time-to-treatment").ti,ab,kf.                                                                                                                                                                                                                                                                                                                                                                                                                                                        | 26471   |
| 8.  | ((early or earlier or prompt* or late or later or rapid or wait* or delay* or timel* or longtime or interval* or route*) adj3 (diagnos* or refer or referred or referral* or referring or consult*).ti,ab,kf.                                                                                                                                                                                                                                                                                                                                                                                                                                                                                                                                                                 | 214615  |
| 9.  | ((diagnos* or confirm* or refer* or consult* or investigat*) adj4 (timelapse* or time lapse* or time elapse* or fasttrack* or fast-track* or timeline* or time line*).ti,ab                                                                                                                                                                                                                                                                                                                                                                                                                                                                                                                                                                                                   | 1510    |
| 10. | delay*.ti                                                                                                                                                                                                                                                                                                                                                                                                                                                                                                                                                                                                                                                                                                                                                                     | 74391   |
| 11. | wait* time*.ti,ab.                                                                                                                                                                                                                                                                                                                                                                                                                                                                                                                                                                                                                                                                                                                                                            | 13384   |
| 12. | or/6-11                                                                                                                                                                                                                                                                                                                                                                                                                                                                                                                                                                                                                                                                                                                                                                       | 338665  |
| 13. | 4 and 12                                                                                                                                                                                                                                                                                                                                                                                                                                                                                                                                                                                                                                                                                                                                                                      | 58490   |
| 14. | diagnos*.ti,ab,kf                                                                                                                                                                                                                                                                                                                                                                                                                                                                                                                                                                                                                                                                                                                                                             | 2562935 |
| 15. | 13 and (1 or 14)                                                                                                                                                                                                                                                                                                                                                                                                                                                                                                                                                                                                                                                                                                                                                              | 48832   |
| 16. | (interprofessional* or inter-professional* or multidisciplin* or multi-disciplin* or navigator* or coordinator* or co-ordinator* or ((patient* or cancer* or care) adj2 (navigat* or coordinat* or co-ordinat* or journey* or continuum*)) or mobile or phone* or smartphone* or reminder* or tele* or information technolog* or communicat*).ti                                                                                                                                                                                                                                                                                                                                                                                                                              | 177088  |
| 17. | 16 and 5                                                                                                                                                                                                                                                                                                                                                                                                                                                                                                                                                                                                                                                                                                                                                                      | 10725   |
| 18. | 15 or 17                                                                                                                                                                                                                                                                                                                                                                                                                                                                                                                                                                                                                                                                                                                                                                      | 59240   |
| 19. | limit 18 to english language                                                                                                                                                                                                                                                                                                                                                                                                                                                                                                                                                                                                                                                                                                                                                  | 49045   |
| 20. | (exp animal experiment/ or exp animal model/ or exp transgenic animal/ or animal/ or chordata/ or vertebrate/ or tetrapod/ or amniote/ or exp amphibia/ or mammal/ or exp reptile/ or therian/ or placental mammals/ or exp marsupial/ or euarchontoglires/ or exp xenarthra/ or primate/ or exp scandentia/ or haplorhini/ or exp prosimian/ or simian/ or exp tarsiform/ or catarrhini/ or exp platyrrhini/ or ape/ or exp cercopithecidae/ or hominid/ or exp hylobatidae/ or exp chimpanzee/ or exp gorilla/ or (animal or animals or pisces or fish or fishes or catfish or catfishes or sheatfish or silurus or arius or heteropneustes or clarias or gariepinus or fathead minnow or fathead minnows or pimephales or promelas or cichlidae or trout or trouts or char | 4778446 |

1  
 2  
 3  
 4 or chars or salvelinus or salmo or oncorhynchus or guppy or guppies or millionfish or poecilia  
 5 or goldfish or goldfishes or carassius or auratus or mullet or mullets or mugil or curema or  
 6 shark or sharks or cod or cods or gadus or morhua or carp or carps or cyprinus or carpio or  
 7 killifish or eel or eels or anguilla or zander or sander or lucioperca or stizostedion or turbot or  
 8 turbot or psetta or flatfish or flatfishes or plaice or pleuronectes or platessa or tilapia or  
 9 tilapias or oreochromis or sarotherodon or common sole or dover sole or solea or zebrafish or  
 10 zebrafishes or danio or rerio or seabass or dicentrarchus or labrax or morone or lamprey or  
 11 lampreys or petromyzon or pumpkinseed or pumpkinseeds or lepomis or gibbosus or herring  
 12 or clupea or harengus or amphibia or amphibian or amphibians or anura or salientia or frog or  
 13 frogs or rana or toad or toads or bufo or xenopus or laevis or bombina or epidalea or calamita  
 14 or salamander or salamanders or newt or newts or triturus or reptilia or reptile or reptiles or  
 15 bearded dragon or pogona or vitticeps or iguana or iguanas or lizard or lizards or anguis  
 16 fragilis or turtle or turtles or snakes or snake or aves or bird or birds or quail or quails or  
 17 coturnix or bobwhite or colinus or virginianus or poultry or poultries or fowl or fowls or  
 18 chicken or chickens or gallus or zebra finch or taeniopygia or guttata or canary or canaries or  
 19 serinus or canaria or parakeet or parakeets or grasskeet or parrot or parrots or psittacine or  
 20 psittacines or shelduck or tadorna or goose or geese or branta or leucopsis or woodlark or  
 21 lullula or flycatcher or ficedula or hypoleuca or dove or doves or geopelia or cuneata or duck  
 22 or ducks or greylag or graylag or anser or harrier or circus pygargus or red knot or great knot  
 23 or calidris or canutus or godwit or limosa or lapponica or meleagris or gallopavo or jackdaw or  
 24 corvus or monedula or ruff or philomachus or pugnax or lapwing or peewit or plover or  
 25 vanellus or swan or cygnus or columbianus or bewickii or gull or chroicocephalus or  
 26 ridibundus or albifrons or great tit or parus or aythya or fuligula or streptopelia or risoria or  
 27 spoonbill or platalea or leucorodia or blackbird or turdus or merula or blue tit or cyanistes or  
 28 pigeon or pigeons or columba or pintail or anas or starling or sturnus or owl or athene noctua  
 29 or pochard or ferina or cockatiel or nymphius or hollandicus or skylark or alauda or tern or  
 30 sterna or teal or crecca or oystercatcher or haematopus or ostralegus or shrew or shrews or  
 31 sores or araneus or crocidura or russula or european mole or talpa or chiroptera or bat or bats  
 32 or eptesicus or serotinus or myotis or dasycneme or daubentonii or pipistrelle or pipistrellus or  
 33 cat or cats or felis or catus or feline or dog or dogs or canis or canine or canines or otter or  
 34 otters or lutra or badger or badgers or meles or fitchew or fitch or foumart or foulmart or  
 35 ferrets or ferret or polecat or polecats or mustela or putorius or weasel or weasels or fox or  
 36 foxes or vulpes or common seal or phoca or vitulina or grey seal or halichoerus or horse or  
 37 horses or equus or equine or equidae or donkey or donkeys or mule or mules or pig or pigs or  
 38 swine or swines or hog or hogs or boar or boars or porcine or piglet or piglets or sus or scrofa  
 39 or llama or llamas or lama or glama or deer or deers or cervus or elaphus or cow or cows or  
 40 bos taurus or bos indicus or bovine or bull or bulls or cattle or bison or bisons or sheep or  
 41 sheeps or ovis aries or ovine or lamb or lambs or mouflon or mouflons or goat or goats or  
 42 capra or caprine or chamois or rupicapra or leporidae or lagomorpha or lagomorph or rabbit or  
 43 rabbits or oryctolagus or cuniculus or laprine or hares or lepus or rodentia or rodent or rodents  
 44 or murinae or mouse or mice or mus or musculus or murine or woodmouse or apodemus or rat  
 45 or rats or rattus or norvegicus or guinea pig or guinea pigs or cavia or porcellus or hamster or  
 46 hamsters or mesocricetus or cricetus or cricetus or gerbil or gerbils or jird or jirds or  
 47 meriones or unguiculatus or jerboa or jerboas or jaculus or chinchilla or chinchillas or beaver  
 48 or beavers or castor fiber or castor canadensis or sciuridae or squirrel or squirrels or sciurus or  
 49 chipmunk or chipmunks or marmot or marmots or marmota or suslik or susliks or  
 50 spermophilus or cynomys or cottonrat or cottonrats or sigmodon or vole or voles or microtus  
 51 or myodes or glareolus or primate or primates or prosimian or prosimians or lemur or lemurs  
 52 or lemuridae or loris or bush baby or bush babies or bushbaby or bushbabies or galago or  
 53 galagos or anthropoidea or anthropoids or simian or simians or monkey or monkeys or  
 54  
 55  
 56  
 57  
 58  
 59  
 60

1  
2  
3  
4  
5  
6  
7  
8  
9  
10  
11  
12  
13  
14  
15  
16  
17  
18  
19  
20  
21  
22  
23  
24  
25  
26  
27  
28  
29  
30  
31  
32  
33  
34  
35  
36  
37  
38  
39  
40  
41  
42  
43  
44  
45  
46  
47  
48  
49  
50  
51  
52  
53  
54  
55  
56  
57  
58  
59  
60

|     |                                                                                                                                                                                                                                                                                                                                                                                                                                                                                                                                                                                                                                                                                                                                                                                                                                                                                                               |       |
|-----|---------------------------------------------------------------------------------------------------------------------------------------------------------------------------------------------------------------------------------------------------------------------------------------------------------------------------------------------------------------------------------------------------------------------------------------------------------------------------------------------------------------------------------------------------------------------------------------------------------------------------------------------------------------------------------------------------------------------------------------------------------------------------------------------------------------------------------------------------------------------------------------------------------------|-------|
|     | marmoset or marmosets or callithrix or cebuella or tamarin or tamarins or saguinus or leontopithecus or squirrel monkey or squirrel monkeys or saimiri or night monkey or night monkeys or owl monkey or owl monkeys or douroucoulis or aotus or spider monkey or spider monkeys or ateles or baboon or baboons or papio or rhesus monkey or macaque or macaca or mulatta or cynomolgus or fascicularis or green monkey or green monkeys or chlorocebus or vervet or vervets or pygerythrus or hominoidea or ape or apes or hylobatidae or gibbon or gibbons or siamang or siamangs or nomascus or symphalangus or hominidae or orangutan or orangutans or pongo or chimpanzee or chimpanzees or pan troglodytes or bonobo or bonobos or pan paniscus or gorilla or gorillas or troglodytes).ti,ab,kf.) not (human/ or (human\$ or man or men or woman or women or child or children or patient\$).ti,ab,kf.) |       |
| 21. | 19 not 20                                                                                                                                                                                                                                                                                                                                                                                                                                                                                                                                                                                                                                                                                                                                                                                                                                                                                                     | 48488 |
| 22. | limit 21 to yr="2017 -Current"                                                                                                                                                                                                                                                                                                                                                                                                                                                                                                                                                                                                                                                                                                                                                                                                                                                                                | 15342 |

**Appendix 3: CINAHL (EbscoHOST) search strategy**

|     |                                                                                                                                                                                                                                                                                                                                                                                                                                                                                                                                                                                                                                                                                                                                                                          |        |
|-----|--------------------------------------------------------------------------------------------------------------------------------------------------------------------------------------------------------------------------------------------------------------------------------------------------------------------------------------------------------------------------------------------------------------------------------------------------------------------------------------------------------------------------------------------------------------------------------------------------------------------------------------------------------------------------------------------------------------------------------------------------------------------------|--------|
| 1.  | (MH "early detection of cancer")                                                                                                                                                                                                                                                                                                                                                                                                                                                                                                                                                                                                                                                                                                                                         | 9365   |
| 2.  | TI (cancer* OR tumo#r* OR neoplasm* OR malignan* OR metasta* OR oncogen* OR oncolog*)                                                                                                                                                                                                                                                                                                                                                                                                                                                                                                                                                                                                                                                                                    | 382286 |
| 3.  | TI (carcinoma* OR adenoma* OR adenocarcinoma* OR blastoma* OR carcinosarcoma* OR leukemia* OR leukaemia* OR lymphoma* OR melanoma* OR mesenchymoma* OR mesothelioma* OR sarcoma* OR thymoma*)                                                                                                                                                                                                                                                                                                                                                                                                                                                                                                                                                                            | 110746 |
| 4.  | S2 OR S3                                                                                                                                                                                                                                                                                                                                                                                                                                                                                                                                                                                                                                                                                                                                                                 | 469442 |
| 5.  | S1 OR S4                                                                                                                                                                                                                                                                                                                                                                                                                                                                                                                                                                                                                                                                                                                                                                 | 471736 |
| 6.  | (MH "early diagnosis") OR (MH "diagnosis, delayed")                                                                                                                                                                                                                                                                                                                                                                                                                                                                                                                                                                                                                                                                                                                      | 14703  |
| 7.  | ( TI (prediagnos* OR "pre-diagnosis" OR (care N1 path#) OR (cancer N1 path#) OR (care N1 pathway*) OR (cancer N1 pathway*) OR (diagnos* N1 phase*) OR (diagnos* N1 path#) OR (referral N1 path#) OR (diagnos* N1 pathway*) OR (referral N1 pathway*) OR (diagnos* N1 interval*) OR (referral N1 interval*) OR (consult* N1 interval*) OR "time-to-treat" OR "time-to-treatment") ) OR ( AB (prediagnos* OR "pre-diagnosis" OR (care N1 path#) OR (cancer N1 path#) OR (care N1 pathway*) OR (cancer N1 pathway*) OR (diagnos* N1 phase*) OR (diagnos* N1 path#) OR (referral N1 path#) OR (diagnos* N1 pathway*) OR (referral N1 pathway*) OR (diagnos* N1 interval*) OR (referral N1 interval*) OR (consult* N1 interval*) OR "time-to-treat" OR "time-to-treatment") ) | 11308  |
| 8.  | (TI ((early OR earlier OR prompt* OR late OR later OR rapid OR wait* OR delay* OR timel* OR longtime OR interval* OR route*) N3 (diagnos* OR refer OR referred OR referral* OR referring OR consult*)) OR (AB ((early OR earlier OR prompt* OR late OR later OR rapid OR wait* OR delay* OR timel* OR longtime OR interval* OR route*) N3 (diagnos* OR refer OR referred OR referral* OR referring OR consult*)))                                                                                                                                                                                                                                                                                                                                                        | 47662  |
| 9.  | (TI ((diagnos* OR confirm* OR refer* OR consult* OR investigat*) N4 (timelapse* OR (time N1 lapse*) OR (time N1 elapse*) OR fasttrack* OR (fast N1 track*) OR timeline* OR (time N1 line*))) OR (AB ((diagnos* OR confirm* OR refer* OR consult* OR investigat*) N4 (timelapse* OR (time N1 lapse*) OR (time N1 elapse*) OR fasttrack* OR (fast N1 track*) OR timeline* OR (time N1 line*))))                                                                                                                                                                                                                                                                                                                                                                            | 582    |
| 10. | TI delay*                                                                                                                                                                                                                                                                                                                                                                                                                                                                                                                                                                                                                                                                                                                                                                | 17790  |
| 11. | (TI (wait* N1 time*)) OR (AB (wait* N1 time*))                                                                                                                                                                                                                                                                                                                                                                                                                                                                                                                                                                                                                                                                                                                           | 6047   |
| 12. | S6 OR S7 OR S8 OR S9 OR S10 OR S11                                                                                                                                                                                                                                                                                                                                                                                                                                                                                                                                                                                                                                                                                                                                       | 88476  |
| 13. | S4 AND S12                                                                                                                                                                                                                                                                                                                                                                                                                                                                                                                                                                                                                                                                                                                                                               | 13005  |
| 14. | (TI diagnos*) OR (AB diagnos*)                                                                                                                                                                                                                                                                                                                                                                                                                                                                                                                                                                                                                                                                                                                                           | 526863 |
| 15. | S13 AND (S1 OR S14)                                                                                                                                                                                                                                                                                                                                                                                                                                                                                                                                                                                                                                                                                                                                                      | 9687   |
| 16. | TI (interprofessional* OR (inter N1 professional*) OR multidisciplin* OR (multi N1 disciplin*) OR navigator* OR coordinator* OR ordinator* OR ((patient* OR cancer* OR care) N2 (navigat* OR coordinat* OR ordinat* OR journey* OR continuum*)) OR mobile OR phone* OR smartphone* OR reminder* OR tele* OR (information N1 technolog*) OR communicat*)                                                                                                                                                                                                                                                                                                                                                                                                                  | 94165  |
| 17. | S16 AND S5                                                                                                                                                                                                                                                                                                                                                                                                                                                                                                                                                                                                                                                                                                                                                               | 5442   |
| 18. | S15 OR S17                                                                                                                                                                                                                                                                                                                                                                                                                                                                                                                                                                                                                                                                                                                                                               | 14982  |
| 19. | S18 Limiters - English Language                                                                                                                                                                                                                                                                                                                                                                                                                                                                                                                                                                                                                                                                                                                                          | 14767  |
| 20. | ((MH "animals+") OR (MH invertebrates+) OR (MH birds+) OR (MH fish) OR (MH "frogs and toads") OR (MH "animals, genetically modified") OR (MH reptiles+) OR (MH mammals) OR (MH bats) OR (MH camels) OR (MH cats) OR (MH cattle) OR (MH dogs) OR (MH dolphins) OR (MH goats) OR (MH horses) OR (MH rabbits) OR (MH rodents+) OR (MH                                                                                                                                                                                                                                                                                                                                                                                                                                       | 216053 |



1  
 2  
 3  
 4 sheep) OR (MH swine) OR (MH primates) OR (animal OR animals OR pisces OR fish OR  
 5 fishes OR catfish OR catfishes OR sheatfish OR silurus OR arius OR heteropneustes OR  
 6 clarias OR gariepinus OR "fathead minnow" OR "fathead minnows" OR pimephales OR  
 7 promelas OR cichlidae OR trout OR trouts OR char OR chars OR salvelinus OR salmo OR  
 8 oncorhynchus OR guppy OR guppies OR millionfish OR poecilia OR goldfish OR goldfishes  
 9 OR carassius OR auratus OR mullet OR mullets OR mugil OR curema OR shark OR sharks  
 10 OR cod OR cods OR gadus OR morhua OR carp OR carps OR cyprinus OR carpio OR  
 11 killifish OR eel OR eels OR anguilla OR zander OR sander OR lucioperca OR stizostedion  
 12 OR turbot OR turbots OR psetta OR flatfish OR flatfishes OR plaice OR pleuronectes OR  
 13 platessa OR tilapia OR tilapias OR oreochromis OR sarotherodon OR "common sole" OR  
 14 "dover sole" OR solea OR zebrafish OR zebrafishes OR danio OR rerio OR seabass OR  
 15 dicentrarchus OR labrax OR morone OR lamprey OR lampreys OR petromyzon OR  
 16 pumpkinseed OR pumpkinseeds OR lepomis OR gibbosus OR herring OR clupea OR  
 17 harengus OR amphibia OR amphibian OR amphibians OR anura OR salientia OR frog OR  
 18 frogs OR rana OR toad OR toads OR bufo OR xenopus OR laevis OR bombina OR epidalea  
 19 OR calamita OR salamander OR salamanders OR newt OR newts OR triturus OR reptilia OR  
 20 reptile OR reptiles OR "bearded dragon" OR pogona OR vitticeps OR iguana OR iguanas OR  
 21 lizard OR lizards OR "anguis fragilis" OR turtle OR turtles OR snakes OR snake OR aves OR  
 22 bird OR birds OR quail OR quails OR coturnix OR bobwhite OR colinus OR virginianus OR  
 23 poultry OR poultries OR fowl OR fowls OR chicken OR chickens OR gallus OR "zebra  
 24 finch" OR taeniopygia OR guttata OR canary OR canaries OR serinus OR canaria OR  
 25 parakeet OR parakeets OR grasskeet OR parrot OR parrots OR psittacine OR psittacines OR  
 26 shelduck OR tadorna OR goose OR geese OR branta OR leucopsis OR woodlark OR lullula  
 27 OR flycatcher OR ficedula OR hypoleuca OR dove OR doves OR geopelia OR cuneata OR  
 28 duck OR ducks OR greylag OR graylag OR anser OR harrier OR circus pygargus OR red knot  
 29 OR "great knot" OR calidris OR canutus OR godwit OR limosa OR lapponica OR meleagris  
 30 OR gallopavo OR jackdaw OR corvus OR monedula OR ruff OR philomachus OR pugnax  
 31 OR lapwing OR peewit OR plover OR vanellus OR swan OR cygnus OR columbianus OR  
 32 bewickii OR gull OR chroicocephalus OR ridibundus OR albifrons OR "great tit" OR parus  
 33 OR aythya OR fuligula OR streptopelia OR risoria OR spoonbill OR platalea OR leucorodia  
 34 OR blackbird OR turdus OR merula OR blue tit OR cyanistes OR pigeon OR pigeons OR  
 35 columba OR pintail OR anas OR starling OR sturnus OR owl OR "athene noctua" OR  
 36 pochard OR ferina OR cockatiel OR nymphicus OR hollandicus OR skylark OR alauda OR  
 37 tern OR sterna OR teal OR crecca OR oystercatcher OR haematopus OR ostralegus OR shrew  
 38 OR shrews OR sorex OR araneus OR crocidura OR russula OR "european mole" OR talpa  
 39 OR chiroptera OR bat OR bats OR eptesicus OR serotinus OR myotis OR dasycneme OR  
 40 daubentonii OR pipistrelle OR pipistrellus OR cat OR cats OR felis OR catus OR feline OR  
 41 dog OR dogs OR canis OR canine OR canines OR otter OR otters OR lutra OR badger OR  
 42 badgers OR meles OR fitchew OR fitch OR foumart OR foulmart OR ferrets OR ferret OR  
 43 polecat OR polecats OR mustela OR putorius OR weasel OR weasels OR fox OR foxes OR  
 44 vulpes OR "common seal" OR phoca OR vitulina OR grey seal OR halichoerus OR horse OR  
 45 horses OR equus OR equine OR equidae OR donkey OR donkeys OR mule OR mules OR pig  
 46 OR pigs OR swine OR swines OR hog OR hogs OR boar OR boars OR porcine OR piglet OR  
 47 piglets OR sus OR scrofa OR llama OR llamas OR lama OR glama OR deer OR deers OR  
 48 cervus OR elaphus OR cow OR cows OR "bos taurus" OR "bos indicus" OR bovine OR bull  
 49 OR bulls OR cattle OR bison OR bisons OR sheep OR sheeps OR "ovis aries" OR ovine OR  
 50 lamb OR lambs OR mouflon OR mouflons OR goat OR goats OR capra OR caprine OR  
 51 chamois OR rupicapra OR leporidae OR lagomorpha OR lagomorph OR rabbit OR rabbits  
 52 OR oryctolagus OR cuniculus OR laprine OR hares OR lepus OR rodentia OR rodent OR  
 53 rodents OR murinae OR mouse OR mice OR mus OR musculus OR murine OR woodmouse  
 54  
 55  
 56  
 57  
 58  
 59  
 60

|     |                                                                                                                                                                                                                                                                                                                                                                                                                                                                                                                                                                                                                                                                                                                                                                                                                                                                                                                                                                                                                                                                                                                                                                                                                                                                                                                                                                                                                                                                                                                                                                                                                                                                                                                                                                                               |       |
|-----|-----------------------------------------------------------------------------------------------------------------------------------------------------------------------------------------------------------------------------------------------------------------------------------------------------------------------------------------------------------------------------------------------------------------------------------------------------------------------------------------------------------------------------------------------------------------------------------------------------------------------------------------------------------------------------------------------------------------------------------------------------------------------------------------------------------------------------------------------------------------------------------------------------------------------------------------------------------------------------------------------------------------------------------------------------------------------------------------------------------------------------------------------------------------------------------------------------------------------------------------------------------------------------------------------------------------------------------------------------------------------------------------------------------------------------------------------------------------------------------------------------------------------------------------------------------------------------------------------------------------------------------------------------------------------------------------------------------------------------------------------------------------------------------------------|-------|
|     | <p>OR apodemus OR rat OR rats OR rattus OR norvegicus OR "guinea pig" OR "guinea pigs" OR cavia OR porcellus OR hamster OR hamsters OR mesocricetus OR cricetus OR gerbil OR gerbils OR jird OR jirds OR meriones OR unguiculatus OR jerboa OR jerboas OR jaculus OR chinchilla OR chinchillas OR beaver OR beavers OR "castor fiber" OR "castor canadensis" OR sciuridae OR squirrel OR squirrels OR sciurus OR chipmunk OR chipmunks OR marmot OR marmots OR marmota OR suslik OR susliks OR spermophilus OR cynomys OR cottonrat OR cottonrats OR sigmodon OR vole OR voles OR microtus OR myodes OR glareolus OR primate OR primates OR prosimian OR prosimians OR lemur OR lemurs OR lemuridae OR loris OR "bush baby" OR "bush babies" OR bushbaby OR bushbabies OR galago OR galagos OR anthropoidea OR anthropoids OR simian OR simians OR monkey OR monkeys OR marmoset OR marmosets OR callithrix OR cebuella OR tamarin OR tamarins OR saguinus OR leontopithecus OR squirrel monkey OR squirrel monkeys OR saimiri OR "night monkey" OR "night monkeys" OR "owl monkey" OR "owl monkeys" OR douroucoulis OR aotus OR "spider monkey" OR "spider monkeys" OR ateles OR baboon OR baboons OR papio OR "rhesus monkey" OR macaque OR macaca OR mulatta OR cynomolgus OR fascicularis OR "green monkey" OR "green monkeys" OR chlorocebus OR vervet OR vervets OR pygerythrus OR hominoidea OR ape OR apes OR hylobatidae OR gibbon OR gibbons OR siamang OR siamangs OR nomascus OR symphalangus OR hominidae OR orangutan OR orangutans OR pongo OR chimpanzee OR chimpanzees OR "pan troglodytes" OR bonobo OR bonobos OR "pan paniscus" OR gorilla OR gorillas OR troglodytes)) NOT ((MH human) OR (human# OR man OR men OR woman OR women OR child OR children OR patient#))</p> |       |
| 21. | S19 NOT S20                                                                                                                                                                                                                                                                                                                                                                                                                                                                                                                                                                                                                                                                                                                                                                                                                                                                                                                                                                                                                                                                                                                                                                                                                                                                                                                                                                                                                                                                                                                                                                                                                                                                                                                                                                                   | 14678 |
| 22. | S21 Limiters - Published Date: 20170101-20201231                                                                                                                                                                                                                                                                                                                                                                                                                                                                                                                                                                                                                                                                                                                                                                                                                                                                                                                                                                                                                                                                                                                                                                                                                                                                                                                                                                                                                                                                                                                                                                                                                                                                                                                                              | 5333  |



#### Appendix 4: Psycinfo (Ovid) search strategy

|     |                                                                                                                                                                                                                                                                                                                                                                                                                                                                                                                                                                                                                                                                                                                                                                                                                                                                                                                                                                                                                                                                                                                                                                                                                                                                                                                                                                                                                                                                                                                                                                                                                                                                                   |        |
|-----|-----------------------------------------------------------------------------------------------------------------------------------------------------------------------------------------------------------------------------------------------------------------------------------------------------------------------------------------------------------------------------------------------------------------------------------------------------------------------------------------------------------------------------------------------------------------------------------------------------------------------------------------------------------------------------------------------------------------------------------------------------------------------------------------------------------------------------------------------------------------------------------------------------------------------------------------------------------------------------------------------------------------------------------------------------------------------------------------------------------------------------------------------------------------------------------------------------------------------------------------------------------------------------------------------------------------------------------------------------------------------------------------------------------------------------------------------------------------------------------------------------------------------------------------------------------------------------------------------------------------------------------------------------------------------------------|--------|
| 1.  | cancer screening/                                                                                                                                                                                                                                                                                                                                                                                                                                                                                                                                                                                                                                                                                                                                                                                                                                                                                                                                                                                                                                                                                                                                                                                                                                                                                                                                                                                                                                                                                                                                                                                                                                                                 | 4776   |
| 2.  | (cancer* or tumor* or neoplasm* or malignan* or metasta* or oncogen* or oncolog*).ti                                                                                                                                                                                                                                                                                                                                                                                                                                                                                                                                                                                                                                                                                                                                                                                                                                                                                                                                                                                                                                                                                                                                                                                                                                                                                                                                                                                                                                                                                                                                                                                              | 44464  |
| 3.  | (carcinoma* or adenoma* or adenocarcinoma* or adeno-carcinoma* or blastoma* or carcinosarcoma* or carcino-sarcoma* or leukemia* or leukaemia* or lymphoma* or melanoma* or mesenchymoma* or mesothelioma* or sarcoma* or thymoma*).ti                                                                                                                                                                                                                                                                                                                                                                                                                                                                                                                                                                                                                                                                                                                                                                                                                                                                                                                                                                                                                                                                                                                                                                                                                                                                                                                                                                                                                                             | 2705   |
| 4.  | or/2-3                                                                                                                                                                                                                                                                                                                                                                                                                                                                                                                                                                                                                                                                                                                                                                                                                                                                                                                                                                                                                                                                                                                                                                                                                                                                                                                                                                                                                                                                                                                                                                                                                                                                            | 46737  |
| 5.  | 1 or 4                                                                                                                                                                                                                                                                                                                                                                                                                                                                                                                                                                                                                                                                                                                                                                                                                                                                                                                                                                                                                                                                                                                                                                                                                                                                                                                                                                                                                                                                                                                                                                                                                                                                            | 47903  |
| 6.  | (prediagnos* or pre-diagnos* or care path? or cancer path? or care pathway* or cancer pathway* or diagnos* phase* or diagnos* path? or referral path? or diagnos* pathway* or referral pathway* or diagnos* interval* or referral interval* or consult* interval* or "time-to-treat" or "time-to-treatment").ti,ab,id.                                                                                                                                                                                                                                                                                                                                                                                                                                                                                                                                                                                                                                                                                                                                                                                                                                                                                                                                                                                                                                                                                                                                                                                                                                                                                                                                                            | 3896   |
| 7.  | ((early or earlier or prompt* or late or later or rapid or wait* or delay* or timel* or longtime or interval* or route*) adj3 (diagnos* or refer or referred or referral* or referring or consult*).ti,ab,id.                                                                                                                                                                                                                                                                                                                                                                                                                                                                                                                                                                                                                                                                                                                                                                                                                                                                                                                                                                                                                                                                                                                                                                                                                                                                                                                                                                                                                                                                     | 13853  |
| 8.  | ((diagnos* or confirm* or refer* or consult* or investigat*) adj4 (timelapse* or time lapse* or time elapse* or fasttrack* or fast-track* or timeline* or time line*).ti,ab                                                                                                                                                                                                                                                                                                                                                                                                                                                                                                                                                                                                                                                                                                                                                                                                                                                                                                                                                                                                                                                                                                                                                                                                                                                                                                                                                                                                                                                                                                       | 168    |
| 9.  | delay*.ti                                                                                                                                                                                                                                                                                                                                                                                                                                                                                                                                                                                                                                                                                                                                                                                                                                                                                                                                                                                                                                                                                                                                                                                                                                                                                                                                                                                                                                                                                                                                                                                                                                                                         | 14212  |
| 10. | wait* time*.ti,ab.                                                                                                                                                                                                                                                                                                                                                                                                                                                                                                                                                                                                                                                                                                                                                                                                                                                                                                                                                                                                                                                                                                                                                                                                                                                                                                                                                                                                                                                                                                                                                                                                                                                                | 1957   |
| 11. | or/6-10                                                                                                                                                                                                                                                                                                                                                                                                                                                                                                                                                                                                                                                                                                                                                                                                                                                                                                                                                                                                                                                                                                                                                                                                                                                                                                                                                                                                                                                                                                                                                                                                                                                                           | 33241  |
| 12. | 4 and 11                                                                                                                                                                                                                                                                                                                                                                                                                                                                                                                                                                                                                                                                                                                                                                                                                                                                                                                                                                                                                                                                                                                                                                                                                                                                                                                                                                                                                                                                                                                                                                                                                                                                          | 1613   |
| 13. | diagnos*.ti,ab,id                                                                                                                                                                                                                                                                                                                                                                                                                                                                                                                                                                                                                                                                                                                                                                                                                                                                                                                                                                                                                                                                                                                                                                                                                                                                                                                                                                                                                                                                                                                                                                                                                                                                 | 324967 |
| 14. | 12 and (1 or 13)                                                                                                                                                                                                                                                                                                                                                                                                                                                                                                                                                                                                                                                                                                                                                                                                                                                                                                                                                                                                                                                                                                                                                                                                                                                                                                                                                                                                                                                                                                                                                                                                                                                                  | 1345   |
| 15. | (interprofessional* or inter-professional* or multidisciplin* or multi-disciplin* or navigator* or coordinator* or co-ordinator* or ((patient* or cancer* or care) adj2 (navigat* or coordinat* or co-ordinat* or journey* or continuum*)) or mobile or phone* or smartphone* or reminder* or tele* or information technolog* or communicat*).ti                                                                                                                                                                                                                                                                                                                                                                                                                                                                                                                                                                                                                                                                                                                                                                                                                                                                                                                                                                                                                                                                                                                                                                                                                                                                                                                                  | 81166  |
| 16. | 15 and 5                                                                                                                                                                                                                                                                                                                                                                                                                                                                                                                                                                                                                                                                                                                                                                                                                                                                                                                                                                                                                                                                                                                                                                                                                                                                                                                                                                                                                                                                                                                                                                                                                                                                          | 1650   |
| 17. | 14 or 16                                                                                                                                                                                                                                                                                                                                                                                                                                                                                                                                                                                                                                                                                                                                                                                                                                                                                                                                                                                                                                                                                                                                                                                                                                                                                                                                                                                                                                                                                                                                                                                                                                                                          | 2949   |
| 18. | limit 17 to english language                                                                                                                                                                                                                                                                                                                                                                                                                                                                                                                                                                                                                                                                                                                                                                                                                                                                                                                                                                                                                                                                                                                                                                                                                                                                                                                                                                                                                                                                                                                                                                                                                                                      | 2756   |
| 19. | (exp animal research/ or animal models/ or exp animals/ or ("20").po or (animal or animals or pisces or fish or fishes or catfish or catfishes or sheatfish or silurus or arius or heteropneustes or clarias or garipepinus or fathead minnow or fathead minnows or pimephales or promelas or cichlidae or trout or trouts or char or chars or salvelinus or salmo or oncorhynchus or guppy or guppies or millionfish or poecilia or goldfish or goldfishes or carassius or auratus or mullet or mullets or mugil or curema or shark or sharks or cod or cods or gadus or morhua or carp or carps or cyprinus or carpio or killifish or eel or eels or anguilla or zander or sander or lucioperca or stizostedion or turbot or turbots or psetta or flatfish or flatfishes or plaice or pleuronectes or platessa or tilapia or tilapias or oreochromis or sarotherodon or common sole or dover sole or solea or zebrafish or zebrafishes or danio or rerio or seabass or dicentrarchus or labrax or morone or lamprey or lampreys or petromyzon or pumpkinseed or pumpkinseeds or lepomis or gibbosus or herring or clupea or harengus or amphibia or amphibian or amphibians or anura or salientia or frog or frogs or rana or toad or toads or bufo or xenopus or laevis or bombina or epidalea or calamita or salamander or salamanders or newt or newts or triturus or reptilia or reptile or reptiles or bearded dragon or pogona or vitticeps or iguana or iguanas or lizard or lizards or anguis fragilis or turtle or turtles or snakes or snake or aves or bird or birds or quail or quails or coturnix or bobwhite or colinus or virginianus or poultry or poultries or | 339315 |

|     |                                                                                                                                                                                                                                                                                                                                                                                                                                                                                                                                                                                                                                                                                                                                                                                                                                                                                                                                                                                                                                                                                                                                                                                                                                                                                                                                                                                                                                                                                                                                                                                                                                                                                                                                                                                                                                                                                                                                                                                                                                                                                                                                                                                                                                                                                                                                                                                                                                                                                                                                                                                                                                                                                                                                                                                                                                                                                                                                                                                                                                                                                                                                                                                                                                                                                                                                                                                                                                                                                                                                                                                                                                                                                                                                                                                                                                                                                                                                                                                                                                                                                                                                                                                                                                                                                                                                                                                                                      |      |
|-----|----------------------------------------------------------------------------------------------------------------------------------------------------------------------------------------------------------------------------------------------------------------------------------------------------------------------------------------------------------------------------------------------------------------------------------------------------------------------------------------------------------------------------------------------------------------------------------------------------------------------------------------------------------------------------------------------------------------------------------------------------------------------------------------------------------------------------------------------------------------------------------------------------------------------------------------------------------------------------------------------------------------------------------------------------------------------------------------------------------------------------------------------------------------------------------------------------------------------------------------------------------------------------------------------------------------------------------------------------------------------------------------------------------------------------------------------------------------------------------------------------------------------------------------------------------------------------------------------------------------------------------------------------------------------------------------------------------------------------------------------------------------------------------------------------------------------------------------------------------------------------------------------------------------------------------------------------------------------------------------------------------------------------------------------------------------------------------------------------------------------------------------------------------------------------------------------------------------------------------------------------------------------------------------------------------------------------------------------------------------------------------------------------------------------------------------------------------------------------------------------------------------------------------------------------------------------------------------------------------------------------------------------------------------------------------------------------------------------------------------------------------------------------------------------------------------------------------------------------------------------------------------------------------------------------------------------------------------------------------------------------------------------------------------------------------------------------------------------------------------------------------------------------------------------------------------------------------------------------------------------------------------------------------------------------------------------------------------------------------------------------------------------------------------------------------------------------------------------------------------------------------------------------------------------------------------------------------------------------------------------------------------------------------------------------------------------------------------------------------------------------------------------------------------------------------------------------------------------------------------------------------------------------------------------------------------------------------------------------------------------------------------------------------------------------------------------------------------------------------------------------------------------------------------------------------------------------------------------------------------------------------------------------------------------------------------------------------------------------------------------------------------------------------------------|------|
|     | <p>fowl or fowls or chicken or chickens or gallus or zebra finch or taeniopygia or guttata or canary or canaries or serinus or canaria or parakeet or parakeets or grasskeet or parrot or parrots or psittacine or psittacines or shelduck or tadorna or goose or geese or branta or leucopsis or woodlark or lullula or flycatcher or ficedula or hypoleuca or dove or doves or geopelia or cuneata or duck or ducks or greylag or graylag or anser or harrier or circus pygargus or red knot or great knot or calidris or canutus or godwit or limosa or lapponica or meleagris or gallopavo or jackdaw or corvus or monedula or ruff or philomachus or pugnax or lapwing or peewit or plover or vanellus or swan or cygnus or columbianus or bewickii or gull or chroicocephalus or ridibundus or albifrons or great tit or parus or aythya or fuligula or streptopelia or risoria or spoonbill or platalea or leucorodia or blackbird or turdus or merula or blue tit or cyanistes or pigeon or pigeons or columba or pintail or anas or starling or sturnus or owl or athene noctua or pochard or ferina or cockatiel or nymphicus or hollandicus or skylark or alauda or tern or sterna or teal or crecca or oystercatcher or haematopus or ostralegus or shrew or shrews or sorex or araneus or crocidura or russula or european mole or talpa or chiroptera or bat or bats or eptesicus or serotinus or myotis or dasyncneme or daubentonii or pipistrelle or pipistrellus or cat or cats or felis or catus or feline or dog or dogs or canis or canine or canines or otter or otters or lutra or badger or badgers or meles or fitchew or fitch or fountmart or foulmart or ferrets or ferret or polecat or polecats or mustela or putorius or weasel or weasels or fox or foxes or vulpes or common seal or phoca or vitulina or grey seal or halichoerus or horse or horses or equus or equine or equidae or donkey or donkeys or mule or mules or pig or pigs or swine or swines or hog or hogs or boar or boars or porcine or piglet or piglets or sus or scrofa or llama or llamas or lama or glama or deer or deers or cervus or elaphus or cow or cows or bos taurus or bos indicus or bovine or bull or bulls or cattle or bison or bisons or sheep or sheeps or ovis aries or ovine or lamb or lambs or mouflon or mouflons or goat or goats or capra or caprine or chamois or rupicapra or leporidae or lagomorpha or lagomorph or rabbit or rabbits or oryctolagus or cuniculus or laprine or hares or lepus or rodentia or rodent or rodents or murinae or mouse or mice or mus or musculus or murine or woodmouse or apodemus or rat or rats or rattus or norvegicus or guinea pig or guinea pigs or cavia or porcellus or hamster or hamsters or mesocricetus or cricetus or gerbil or gerbils or jird or jirds or meriones or unguiculatus or jerboa or jerboas or jaculus or chinchilla or chinchillas or beaver or beavers or castor fiber or castor canadensis or sciuridae or squirrel or squirrels or sciurus or chipmunk or chipmunks or marmot or marmots or marmota or suslik or susliks or spermophilus or cynomys or cottonrat or cottonrats or sigmodon or vole or voles or microtus or myodes or glareolus or primate or primates or prosimian or prosimians or lemur or lemurs or lemuridae or loris or bush baby or bush babies or bushbaby or bushbabies or galago or galagos or anthropoidea or anthropoids or simian or simians or monkey or monkeys or marmoset or marmosets or callithrix or cebuella or tamarin or tamarins or saguinus or leontopithecus or squirrel monkey or squirrel monkeys or saimiri or night monkey or night monkeys or owl monkey or owl monkeys or douroucoulis or aotus or spider monkey or spider monkeys or ateles or baboon or baboons or papio or rhesus monkey or macaque or macaca or mulatta or cynomolgus or fascicularis or green monkey or green monkeys or chlorocebus or vervet or vervets or pygerythrus or hominoidea or ape or apes or hylobatidae or gibbon or gibbons or siamang or siamangs or nomascus or symphalangus or hominidae or orangutan or orangutans or pongo or chimpanzee or chimpanzees or pan troglodytes or bonobo or bonobos or pan paniscus or gorilla or gorillas or troglodytes).ti,ab,id.) not ("10").po or (human\$ or man or men or woman or women or child or children or patient\$).ti,ab,id.)</p> |      |
| 20. | 18 not 19                                                                                                                                                                                                                                                                                                                                                                                                                                                                                                                                                                                                                                                                                                                                                                                                                                                                                                                                                                                                                                                                                                                                                                                                                                                                                                                                                                                                                                                                                                                                                                                                                                                                                                                                                                                                                                                                                                                                                                                                                                                                                                                                                                                                                                                                                                                                                                                                                                                                                                                                                                                                                                                                                                                                                                                                                                                                                                                                                                                                                                                                                                                                                                                                                                                                                                                                                                                                                                                                                                                                                                                                                                                                                                                                                                                                                                                                                                                                                                                                                                                                                                                                                                                                                                                                                                                                                                                                            | 2754 |
| 21. | limit 20 to yr="2017 -Current"                                                                                                                                                                                                                                                                                                                                                                                                                                                                                                                                                                                                                                                                                                                                                                                                                                                                                                                                                                                                                                                                                                                                                                                                                                                                                                                                                                                                                                                                                                                                                                                                                                                                                                                                                                                                                                                                                                                                                                                                                                                                                                                                                                                                                                                                                                                                                                                                                                                                                                                                                                                                                                                                                                                                                                                                                                                                                                                                                                                                                                                                                                                                                                                                                                                                                                                                                                                                                                                                                                                                                                                                                                                                                                                                                                                                                                                                                                                                                                                                                                                                                                                                                                                                                                                                                                                                                                                       | 608  |

## Appendix 5: Websites of relevant organizations and professional bodies searched for literature

**Canada**

- Alberta Cancer Foundation
- BC Cancer Foundation
- BC Cancer Agency
- Cancer Care Manitoba
- Cancer Care Nova Scotia
- Cancer Care Ontario
- CancerControl Alberta
- Canada Health Infoway
- Canadian Association of Nurses in Oncology
- Canadian Association of Psychosocial Oncology
- Canadian Cancer Society
- Canadian Foundation for Healthcare Improvement
- Canadian Foundation for Innovation
- Canadian Institutes of Health Research
- Cancer and Primary Care Research
- Cancer Quality Council of Ontario
- Cancerview.ca
- CanIMPACT
- College of Family Physicians of Canada
- International Network
- New Brunswick Cancer Network
- Ontario Institute for Cancer Research
- Quebec Health and Social Services (Direction québécoise de cancérologie, Ministère de la Santé et des Services sociaux)
- Royal College of Physicians and Surgeons of Canada
- Saskatchewan Cancer Agency
- Trillium Health Partners

**International**

- Association of Community Cancer Centres – USA
- Centers for Disease Control and Prevention – USA
- Commission on Cancer of the American College of Surgeons – USA
- Institute of Medicine – USA
- National Cancer Institute – USA
- National Comprehensive Cancer Network – USA
- Cancer Research UK (including the Accelerate, Coordinate, Evaluate Programme) – UK
- Kings Fund – UK
- National Health Service (NHS) – UK
- National Institute for Health and Care Excellence (NICE) – UK
- Northern Cancer Network – New Zealand
- Cancer Australia – Australia
- Sax Institute – Australia
- Denmark (Ministry of Health)
- Sweden (Ministry of Health)
- European Organization for Research and Treatment of Cancer – Europe
- European Society for Medical Oncology – Europe
- European Partnership Action Against Cancer – Europe
- World Health Organization – International

**Appendix 6: Definition for interventions related to the review questions**

- 1  
2  
3  
4  
5 • *Centralized or coordinated diagnostic service*: Brings together various tests/procedures and care  
6 providers needed to determine a definitive diagnosis at one location.  
7
- 8  
9 • *Interventions in diagnostic services*: An initiative that aims to improve diagnostic services within  
10 a jurisdiction.  
11
- 12  
13 • *Multidisciplinary team*: Working with multiple departments, such as diagnostic imaging,  
14 pathology, medical oncology, and research.  
15
- 16  
17 • *Patient navigation*: A dedicated role to help facilitate the navigation for patients across the  
18 cancer journey – helps the patient through testing, appointments, health literacy, etc.  
19
- 20  
21 • *Rapid referral pathway*: Provides urgent access to specialists and/or diagnostic services for  
22 patients.  
23
- 24  
25 • *Remote or rural populations*: This refers to populations that may live in non-urban areas. They  
26 often do not have access to the same services as those who reside in more urban areas.  
27
- 28  
29 • *Standardized care pathway*: Sets expectations for cancer care based on evidence and shares  
30 information about how to provide and what care to provide at each point of diagnosis, treatment,  
31 and survivorship. Initiative is often integrated into the current health system.  
32
- 33  
34 • *Support for primary care providers*: Initiative focusing on educating and supporting primary care  
35 providers on care pathways and how to care for individuals presenting with potential or  
36 confirmed cancer symptoms.  
37
- 38  
39 • *Target or benchmark*: A figure used as a goal by jurisdictions to measure progress towards the  
40 desired outcome of an initiative.  
41
- 42  
43 • *Technology to support diagnosis process*: Technological innovations to enhance efficiency of  
44 initiatives.  
45  
46  
47  
48  
49  
50  
51  
52  
53  
54

**Appendix 7:** Summary of the characteristics of the included published articles that reported data on ineffective interventions

| <b>Interventions</b>                                | <b>Article</b>                | <b>Study country (Region)</b> | <b>Study type (Study years)</b> | <b>Cancer type (Population) [Sample size]</b>                | <b>Assessment metric</b>                                    | <b>Result</b>                                                                                                                                                                                                                                             |
|-----------------------------------------------------|-------------------------------|-------------------------------|---------------------------------|--------------------------------------------------------------|-------------------------------------------------------------|-----------------------------------------------------------------------------------------------------------------------------------------------------------------------------------------------------------------------------------------------------------|
| <b>Interventions to enhance diagnostic services</b> | Agnarsdottir 2019             | Sweden (Uppsala)              | Cross-sectional (2016-2018)     | Skin (Adult) [286]                                           | Reporting time                                              | The reporting time increased from 18 to 31 days for the non-priority cases and from 15 to 25 days for all cases with invasive melanomas (Ineffective)                                                                                                     |
|                                                     | McCutchan 2020                | UK (Wales)                    | Before-and-After (2016)         | Lung (Mixed age) [1011 (pre-campaign); 1013 (post-campaign)] | Urgent suspected referrals to specialist                    | There was no statistically significant change in urgent suspected cancer referrals (p = 0.82) in routes to diagnosis (Ineffective)                                                                                                                        |
| <b>Multidisciplinary team</b>                       | Largey 2020                   | Australia (Victoria)          | Before-and-After (2016-2017)    | Lung (Adult) [429]                                           | Time interval from referral to first specialist appointment | Referral to first specialist appointment interval was reduced in the post intervention period from median (IQR) 6 (0-15) to 4 (1-10) days, with no significant trend (p=0.962) (Ineffective)                                                              |
|                                                     | Thalanayar Muthukrishnan 2020 | USA (Cleveland)               | Case-Control (2015-2017)        | Lung (NR) [161]                                              | Time interval from suspicion to diagnosis                   | The mean time intervals for imaging to staging (with standard deviations) were 65 days in controls (SD=42.67) and 75 days (SD=58.27) in tumor board cases (p=0.39) (Ineffective)                                                                          |
| <b>Interventions</b>                                | <b>Article</b>                | <b>Study country (Region)</b> | <b>Study type (Study years)</b> | <b>Cancer type (Population) [Sample size]</b>                | <b>Assessment metric</b>                                    | <b>Result</b>                                                                                                                                                                                                                                             |
| <b>Rapid referral pathway</b>                       | Fallon 2019                   | UK (Luton)                    | Case-Control (2015-2017)        | Gastrointestinal (Adult) [509 (148 UGI; 361 LGI)]            | Stage of malignancy at time of presentation                 | Two weeks wait referral did not achieve an earlier diagnosis compared with non-2 week wait routes of referral in upper gastrointestinal ( $\chi^2(3)=2.6$ , p=0.458) and lower gastrointestinal ( $\chi^2(3)=0.884$ , p=0.829) malignancies (Ineffective) |
|                                                     | Jefferson 2019                | UK                            | Cross-sectional (2016-2018)     | Multiple (Adult) [24]                                        | Factors affecting patients' non-                            | The following were identified: system flaws; GP difficulties with booking                                                                                                                                                                                 |

|                                  |                |                               |                                 |                                               |                                                                        |                                                                                                                                                                                                                                                                                                              |
|----------------------------------|----------------|-------------------------------|---------------------------------|-----------------------------------------------|------------------------------------------------------------------------|--------------------------------------------------------------------------------------------------------------------------------------------------------------------------------------------------------------------------------------------------------------------------------------------------------------|
|                                  |                | (A Northern English city)     |                                 |                                               | attendance following referral                                          | appointments; patient difficulties with navigating the appointment system, patients leading ‘difficult lives’; and patients’ expectations of the referral, informed by their beliefs, circumstances, priorities, and the perceived prognosis (Ineffective)                                                   |
|                                  | Kassirian 2020 | Canada (London, Ontario)      | Cross-sectional (2017-2018)     | Ear, Nose and Throat (Adult) [102]            | Time from presentation to appointment at the multi-disciplinary clinic | The average time for patients to have their first appointment was 15.1 months, consisting of 3.9 months for patients to see a health care provider for the first time since symptom onset and 10.7 months from first appointment to being seen at the clinic – representing significant delays (Ineffective) |
|                                  | Neal 2017      | UK (Wales; Yorkshire)         | RCT (2012-2015)                 | Lung (Adult) [255]                            | Anxiety and depression scores                                          | There was no evidence of a difference in post-randomisation anxiety scores between trial arms (median (IQR): 6 (3–8) in control vs 5 (3–9) in intervention, $z=0.32$ ; $P=0.75$ ) (Ineffective)                                                                                                              |
|                                  | Scott 2020     | UK (Countrywide)              | Case-Control (2009-2011)        | Multiple (Mixed age) [10314]                  | Cancer occurrence 5 years after negative diagnosis                     | 4.0% for those referred via pathway and 2.1% for those routinely referred (Ineffective)                                                                                                                                                                                                                      |
|                                  | Talwar 2020    | UK (Merseyside)               | Cross-sectional (2017-2019)     | Head and Neck (NR) [113]                      | Time from referral to being seen in hospital                           | The time taken from referral to being seen in hospital was a median (IQR) of 10 (6–13) days (range 1–28 days) with 11/110 (10%) exceeding 14 days (Ineffective)                                                                                                                                              |
| <b>Interventions</b>             | <b>Article</b> | <b>Study country (Region)</b> | <b>Study type (Study years)</b> | <b>Cancer type (Population) [Sample size]</b> | <b>Assessment metric</b>                                               | <b>Result</b>                                                                                                                                                                                                                                                                                                |
| <b>Standardized care pathway</b> | Almuammar 2019 | Saudi Arabia (Countrywide)    | Cross-sectional (2010-2012)     | Multiple (Adult) [20]                         | Patient satisfaction with GP in the pathway                            | Patients felt that GPs did not listen to them, and were likely to undermine the role of GPs as active practitioners in healthcare provision (Ineffective)                                                                                                                                                    |
|                                  | Gardner 2020   | UK (Edinburgh)                | Case-Control (2016-2018)        | Ear, Nose and Throat                          | Time from referral to diagnosis                                        | Patients referred by GP on the ‘urgent suspicion of cancer’ pathway were seen more quickly than those referred                                                                                                                                                                                               |



|                                           |                  |                               |                                 |                                                  |                                                                                 |                                                                                                                                                                                                                                |
|-------------------------------------------|------------------|-------------------------------|---------------------------------|--------------------------------------------------|---------------------------------------------------------------------------------|--------------------------------------------------------------------------------------------------------------------------------------------------------------------------------------------------------------------------------|
|                                           |                  |                               |                                 | (Mixed age)<br>[62]                              |                                                                                 | routinely were. However, these differences were not significant (Ineffective)                                                                                                                                                  |
|                                           | Iachina 2017     | Denmark (Countrywide)         | Case-Control (2008-2012)        | Lung (Adult) [11273]                             | Time from referral to end of primary investigation                              | Time from referral to the end of primary investigation did not significantly change (1.00 (0.93;1.08)) (Ineffective)                                                                                                           |
|                                           | Jensen 2017      | Denmark (Countrywide)         | Case-Control (2004-2010)        | Multiple (Adult) [7725]                          | Mortality                                                                       | When comparing pathway-referred patients against non-pathway-referred patients, non-significant lower excess mortality was observed among the pathway referred (excess hazard ratios = 0.86 (95% CI: 0.73;1.01)) (Ineffective) |
|                                           | Price 2020       | UK (National)                 | Cross-sectional (2006-2017)     | Multiple (Adult) [83935]                         | Diagnostic interval                                                             | Median New-NICE values were consistently longer (99, 40–212 in 2006 vs 103, 42–236 days in 2017) than Old-NICE values across all cancers (Ineffective)                                                                         |
| <b>Interventions</b>                      | <b>Article</b>   | <b>Study country (Region)</b> | <b>Study type (Study years)</b> | <b>Cancer type (Population) [Sample size]</b>    | <b>Assessment metric</b>                                                        | <b>Result</b>                                                                                                                                                                                                                  |
| <b>Support for primary care providers</b> | Evans 2018       | UK (Oxfordshire)              | Cross-sectional (2016-2017)     | Multiple (Adult) [NR]                            | GP perspectives on safety netting                                               | GPs revealed uncertainty about which aspects of clinical practice were considered safety netting (Ineffective)                                                                                                                 |
|                                           | Kidney 2017      | UK (Urban West Midlands)      | Cross-sectional (2014)          | Gastrointestinal (Adult) [NR]                    | Barriers for referral                                                           | A desire to avoid over-referral, lack of knowledge of guidelines, and the use of individually derived decision rules for further investigation or referral of symptoms (Ineffective)                                           |
|                                           | Zienius 2019     | UK (Scotland)                 | Cross-sectional (2010-2015)     | Brain (Adult) [2938]                             | Predictive value of referral guidelines for imaging where a tumour is suspected | With symptom-based referral guidelines, primary care doctors can identify patients with a 3% positive predictive value (Ineffective)                                                                                           |
|                                           | Di Girolamo 2018 | UK (England)                  | Cross-sectional (2009-2013)     | Multiple (Mixed age) [360643 (CRC) 164890, lung] | 1-year survival of patients                                                     | For 31-day and 62-day targets survival was worse for those for whom the targets were and were not met (Ineffective)                                                                                                            |

|                                                |                            |                                    |                                 |                                               |                                                       |                                                                                                                                                                                                                        |
|------------------------------------------------|----------------------------|------------------------------------|---------------------------------|-----------------------------------------------|-------------------------------------------------------|------------------------------------------------------------------------------------------------------------------------------------------------------------------------------------------------------------------------|
|                                                | 171208, ovarian<br>24545)] |                                    |                                 |                                               |                                                       |                                                                                                                                                                                                                        |
| <b>Target or benchmark for wait times</b>      | Brian 2017                 | New Zealand (Hamilton)             | Before-and-After (2016)         | Skin (Adult) [143]                            | Time to diagnosis                                     | Compliance with recommended time intervals was poor for patients referred with skin lesions suspicious for melanoma; from referral to diagnostic skin biopsy, compliance was 17.6% (Ineffective)                       |
|                                                | Venchairutti 2016          | Australia (New South Wales)        | Case-Control (2008-2013)        | Multiple (Adult) [224]                        | Time from symptom onset to diagnosis                  | Regional/remote patients had a longer interval from symptom onset to diagnosis (median 5.4 months [IQR 9.2 months]) compared with metropolitan patients (median 2.1 months [IQR 4.3 months]) (P = 0.002) (Ineffective) |
| <b>Interventions</b>                           | <b>Article</b>             | <b>Study country (Region)</b>      | <b>Study type (Study years)</b> | <b>Cancer type (Population) [Sample size]</b> | <b>Assessment metric</b>                              | <b>Result</b>                                                                                                                                                                                                          |
| <b>Technology to support diagnosis process</b> | Chung 2020                 | Netherlands (Amsterdam; Rotterdam) | Cross-sectional (2017)          | Skin (Adult) [125]                            | Risk assessment performance                           | The inter-observer agreement between the ratings of the automated risk assessment and the dermatologist was poor (Ineffective)                                                                                         |
|                                                | Lau 2018                   | UK (West Midlands and Berkshire)   | Case-Control (2009-2013)        | Multiple (Adult) [1005]                       | False-negative rate                                   | A sensitivity of 31% and specificity of 92% (Ineffective)                                                                                                                                                              |
|                                                | Pannebakker 2019           | UK (NR)                            | Cross-sectional (2016-2017)     | Skin (Adult) [14]                             | Patient perspectives on implementation and usefulness | No patients were aware that the electronic clinical decision support had been used during their consultation (Ineffective)                                                                                             |
|                                                | Walter 2020                | UK (Eastern England)               | RCT (2016-2017)                 | Skin (Adult) [238]                            | Time between first noticing a change and consultation | There were no statistically significant differences between trial groups on any of the secondary outcome measures (Ineffective)                                                                                        |

CRC = colorectal cancer; GP = general practitioner; LGI = upper gastrointestinal; NICE = National Institute for Health and Care Excellence; NR = not reported; RCT = randomized controlled trial; UGI = upper gastrointestinal; UK = United Kingdom; USA = United States of America; IQR = interquartile range



**Appendix 8:** Summary of the characteristics of the included published articles that reported data on remote or rural populations

| Article              | Study country (Region)        | Study type (Study years)     | Cancer type (Population) [Sample size] | Assessment metric                                   | Result                                                                                                                                                                                                    |
|----------------------|-------------------------------|------------------------------|----------------------------------------|-----------------------------------------------------|-----------------------------------------------------------------------------------------------------------------------------------------------------------------------------------------------------------|
| Chavarri-Guerra 2019 | Mexico (Mexico City)          | Before-and-After (2016-2017) | Multiple (Adult) [70]                  | Feasibility of patient navigation                   | All patients were from an under-served population. 91% of patients successfully obtained appointments at cancer centers in <3 months.                                                                     |
| Emery 2017           | Australia (Western Australia) | RCT (2011-2013)              | Multiple (Adult) [1358]                | Time to diagnosis                                   | All patients were from a rural population. There were no significant differences on the time to diagnosis with and without intervention.                                                                  |
| Murchie 2020         | UK (Scotland; England)        | Cross-sectional (2017)       | Multiple (Mixed age) [1314]            | Time from presentation in primary care to diagnosis | The median primary care interval was 5 days (IQR 0-23 days) and median diagnostic interval was 30 days (IQR 13-68). Diagnostic intervals were longer in the most remote patients.                         |
| Venchairutti 2016    | Australia (New South Wales)   | Case-Control (2008-2013)     | Multiple (Adult) [224]                 | Time from symptom onset to diagnosis                | Regional/remote patients had a longer interval from symptom onset to diagnosis (median 5.4 months [IQR 9.2 months]) compared with metropolitan patients (median 2.1 months [IQR 4.3 months]) (P = 0.002). |
| Yeşiler 2020         | Turkey (Ankara)               | Cross-sectional (2010-2011)  | Lung (Adult) [122]                     | Delay in diagnosis times                            | No significant difference in the mean duration from symptom onset to pathological diagnosis. No significant differences were identified based on patient residence.                                       |

UK = United Kingdom; IQR = interquartile range

**Appendix 9:** Summary of performance metrics to measure improvements in suspicion to diagnosis phase

| <b>Intervention Type</b>                      | <b>Performance Metric</b>                                                                                                                                                                                                                                                                                                                                                                                                                                                                                                                                                               |
|-----------------------------------------------|-----------------------------------------------------------------------------------------------------------------------------------------------------------------------------------------------------------------------------------------------------------------------------------------------------------------------------------------------------------------------------------------------------------------------------------------------------------------------------------------------------------------------------------------------------------------------------------------|
| Centralized or coordinated diagnostic service | <ul style="list-style-type: none"> <li>• Time from presentation in primary care to diagnosis</li> <li>• Time from referral from primary care to specialist consultation</li> <li>• Time from first abnormal image to biopsy</li> </ul>                                                                                                                                                                                                                                                                                                                                                  |
| Interventions to enhance diagnostic services  | <ul style="list-style-type: none"> <li>• Time from referral from primary care to specialist consultation</li> <li>• Time from initial specialist consultation to diagnosis</li> <li>• Time from initial specialist consultation to biopsy</li> <li>• Time from first abnormal image to biopsy</li> <li>• Time from presentation in primary care to biopsy</li> <li>• Total diagnostic interval</li> <li>• Turnaround time for diagnosis following histology</li> <li>• Number of urgent referrals to specialist</li> <li>• Cancer detection rate</li> <li>• Patient survival</li> </ul> |
| Multidisciplinary team                        | <ul style="list-style-type: none"> <li>• Time from referral from primary care to specialist consultation</li> <li>• Time from first abnormal image to diagnosis</li> </ul>                                                                                                                                                                                                                                                                                                                                                                                                              |
| Patient navigation                            | <ul style="list-style-type: none"> <li>• Waiting times from the point of referral from primary care to initial specialist assessment</li> <li>• Feasibility of program/process</li> <li>• Delays in diagnostic resolutions</li> </ul>                                                                                                                                                                                                                                                                                                                                                   |

## Summary of findings

- This scoping review explores contemporary interventions focused on improving accurate and timely cancer diagnosis among symptomatic individuals.
- It included 88 unique published (peer-reviewed) articles and 16 unique unpublished articles (grey literature; representing 18 different reports).
- The United Kingdom appears to be championing this area of research, contributing about half of all identified published literature and 83% of the identified unpublished literature.
- Rapid referral pathways and technology for supporting and streamlining the diagnosis process were the most commonly studied interventions.
- Most of the interventions were in lung cancer patients.
- There was scant reporting on interventions for underserved/Indigenous populations.
- Performance metrics utilized in studies were mainly intervention-dependent; however, time from presentation to diagnosis and from referral to specialist consultation were most consistent metrics across the majority of interventions, with performance metrics to measure patients' experience mainly centered on patient-reported satisfaction and quality of life.
- A common theme among the effective interventions (based on author-reported outcomes) involved multidisciplinary cooperation and a nurse navigator, with interventions generally complex and organization-specific.
- None of the support packages for primary care providers (all educational and informational) was found to be effective; the identified common theme across the publications was a lack of awareness of referral guidelines and associated knowledge by general practitioners notwithstanding this information being provided.

1  
2  
3  
4  
5  
6  
7  
8  
9  
10  
11  
12  
13  
14  
15  
16  
17  
18  
19  
20  
21  
22  
23  
24  
25  
26  
27  
28  
29  
30  
31  
32  
33  
34  
35  
36  
37  
38  
39  
40  
41  
42  
43  
44  
45  
46  
47  
48  
49  
50  
51  
52  
53  
54  
55  
56  
57  
58  
59  
60

For peer review only

## Preferred Reporting Items for Systematic reviews and Meta-Analyses extension for Scoping Reviews (PRISMA-ScR) Checklist

| SECTION                                               | ITEM | PRISMA-ScR CHECKLIST ITEM                                                                                                                                                                                                                                                                                  | REPORTED ON PAGE # |
|-------------------------------------------------------|------|------------------------------------------------------------------------------------------------------------------------------------------------------------------------------------------------------------------------------------------------------------------------------------------------------------|--------------------|
| <b>TITLE</b>                                          |      |                                                                                                                                                                                                                                                                                                            |                    |
| Title                                                 | 1    | Identify the report as a scoping review.                                                                                                                                                                                                                                                                   | 1                  |
| <b>ABSTRACT</b>                                       |      |                                                                                                                                                                                                                                                                                                            |                    |
| Structured summary                                    | 2    | Provide a structured summary that includes (as applicable): background, objectives, eligibility criteria, sources of evidence, charting methods, results, and conclusions that relate to the review questions and objectives.                                                                              | 4-5                |
| <b>INTRODUCTION</b>                                   |      |                                                                                                                                                                                                                                                                                                            |                    |
| Rationale                                             | 3    | Describe the rationale for the review in the context of what is already known. Explain why the review questions/objectives lend themselves to a scoping review approach.                                                                                                                                   | 7-8                |
| Objectives                                            | 4    | Provide an explicit statement of the questions and objectives being addressed with reference to their key elements (e.g., population or participants, concepts, and context) or other relevant key elements used to conceptualize the review questions and/or objectives.                                  | 8-9                |
| <b>METHODS</b>                                        |      |                                                                                                                                                                                                                                                                                                            |                    |
| Protocol and registration                             | 5    | Indicate whether a review protocol exists; state if and where it can be accessed (e.g., a Web address); and if available, provide registration information, including the registration number.                                                                                                             | 9                  |
| Eligibility criteria                                  | 6    | Specify characteristics of the sources of evidence used as eligibility criteria (e.g., years considered, language, and publication status), and provide a rationale.                                                                                                                                       | 10-11              |
| Information sources*                                  | 7    | Describe all information sources in the search (e.g., databases with dates of coverage and contact with authors to identify additional sources), as well as the date the most recent search was executed.                                                                                                  | 10                 |
| Search                                                | 8    | Present the full electronic search strategy for at least 1 database, including any limits used, such that it could be repeated.                                                                                                                                                                            | Appendix 2 - 4     |
| Selection of sources of evidence†                     | 9    | State the process for selecting sources of evidence (i.e., screening and eligibility) included in the scoping review.                                                                                                                                                                                      | 10-11              |
| Data charting process‡                                | 10   | Describe the methods of charting data from the included sources of evidence (e.g., calibrated forms or forms that have been tested by the team before their use, and whether data charting was done independently or in duplicate) and any processes for obtaining and confirming data from investigators. | 11-12              |
| Data items                                            | 11   | List and define all variables for which data were sought and any assumptions and simplifications made.                                                                                                                                                                                                     | Appendix 6         |
| Critical appraisal of individual sources of evidence§ | 12   | If done, provide a rationale for conducting a critical appraisal of included sources of evidence; describe the methods used and how this information was used in any data synthesis (if appropriate).                                                                                                      | Not applicable     |

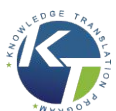

| SECTION                                       | ITEM | PRISMA-ScR CHECKLIST ITEM                                                                                                                                                                       | REPORTED ON PAGE # |
|-----------------------------------------------|------|-------------------------------------------------------------------------------------------------------------------------------------------------------------------------------------------------|--------------------|
| Synthesis of results                          | 13   | Describe the methods of handling and summarizing the data that were charted.                                                                                                                    | 11-12              |
| <b>RESULTS</b>                                |      |                                                                                                                                                                                                 |                    |
| Selection of sources of evidence              | 14   | Give numbers of sources of evidence screened, assessed for eligibility, and included in the review, with reasons for exclusions at each stage, ideally using a flow diagram.                    | Figure 1           |
| Characteristics of sources of evidence        | 15   | For each source of evidence, present characteristics for which data were charted and provide the citations.                                                                                     | Table 1            |
| Critical appraisal within sources of evidence | 16   | If done, present data on critical appraisal of included sources of evidence (see item 12).                                                                                                      | Not applicable     |
| Results of individual sources of evidence     | 17   | For each included source of evidence, present the relevant data that were charted that relate to the review questions and objectives.                                                           | 14-24              |
| Synthesis of results                          | 18   | Summarize and/or present the charting results as they relate to the review questions and objectives.                                                                                            | 13-24              |
| <b>DISCUSSION</b>                             |      |                                                                                                                                                                                                 |                    |
| Summary of evidence                           | 19   | Summarize the main results (including an overview of concepts, themes, and types of evidence available), link to the review questions and objectives, and consider the relevance to key groups. | 25-27              |
| Limitations                                   | 20   | Discuss the limitations of the scoping review process.                                                                                                                                          | 27                 |
| Conclusions                                   | 21   | Provide a general interpretation of the results with respect to the review questions and objectives, as well as potential implications and/or next steps.                                       | 28                 |
| <b>FUNDING</b>                                |      |                                                                                                                                                                                                 |                    |
| Funding                                       | 22   | Describe sources of funding for the included sources of evidence, as well as sources of funding for the scoping review. Describe the role of the funders of the scoping review.                 | 2                  |

JBI = Joanna Briggs Institute; PRISMA-ScR = Preferred Reporting Items for Systematic reviews and Meta-Analyses extension for Scoping Reviews.

\* Where *sources of evidence* (see second footnote) are compiled from, such as bibliographic databases, social media platforms, and Web sites.

† A more inclusive/heterogeneous term used to account for the different types of evidence or data sources (e.g., quantitative and/or qualitative research, expert opinion, and policy documents) that may be eligible in a scoping review as opposed to only studies. This is not to be confused with *information sources* (see first footnote).

‡ The frameworks by Arksey and O'Malley (6) and Levac and colleagues (7) and the JBI guidance (4, 5) refer to the process of data extraction in a scoping review as data charting.

§ The process of systematically examining research evidence to assess its validity, results, and relevance before using it to inform a decision. This term is used for items 12 and 19 instead of "risk of bias" (which is more applicable to systematic reviews of interventions) to include and acknowledge the various sources of evidence that may be used in a scoping review (e.g., quantitative and/or qualitative research, expert opinion, and policy document).

From: Tricco AC, Lillie E, Zarin W, O'Brien KK, Colquhoun H, Levac D, et al. PRISMA Extension for Scoping Reviews (PRISMA-ScR): Checklist and Explanation. *Ann Intern Med.* 2018;169:467–473. doi: 10.7326/M18-0850.

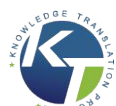

St. Michael's

Inspired Care.  
Inspiring Science.

For peer review only - <http://bmjopen.bmj.com/site/about/guidelines.xhtml>

# BMJ Open

## Interventions to improve early cancer diagnosis of symptomatic patients: A scoping review

|                                 |                                                                                                                                                                                                                                                                                                                                                                                                                                                                                                                                                                                                                                                                                                                                                                                          |
|---------------------------------|------------------------------------------------------------------------------------------------------------------------------------------------------------------------------------------------------------------------------------------------------------------------------------------------------------------------------------------------------------------------------------------------------------------------------------------------------------------------------------------------------------------------------------------------------------------------------------------------------------------------------------------------------------------------------------------------------------------------------------------------------------------------------------------|
| Journal:                        | <i>BMJ Open</i>                                                                                                                                                                                                                                                                                                                                                                                                                                                                                                                                                                                                                                                                                                                                                                          |
| Manuscript ID                   | bmjopen-2021-055488.R1                                                                                                                                                                                                                                                                                                                                                                                                                                                                                                                                                                                                                                                                                                                                                                   |
| Article Type:                   | Original research                                                                                                                                                                                                                                                                                                                                                                                                                                                                                                                                                                                                                                                                                                                                                                        |
| Date Submitted by the Author:   | 24-Sep-2021                                                                                                                                                                                                                                                                                                                                                                                                                                                                                                                                                                                                                                                                                                                                                                              |
| Complete List of Authors:       | Okoli, George; University of Manitoba Max Rady College of Medicine<br>Lam, Otto; University of Manitoba Max Rady College of Medicine<br>Reddy, Viraj; University of Manitoba Max Rady College of Medicine<br>Copstein, Leslie; University of Manitoba Max Rady College of Medicine<br>Askin, Nicole; University of Manitoba<br>Prashad, Anubha; Canadian Partnership Against Cancer<br>Stiff, Jennifer; Canadian Partnership Against Cancer<br>Khare, Satya Rashi; Canadian Partnership Against Cancer<br>Leonard, Robyn; Canadian Partnership Against Cancer<br>Zarin, Wasifa; Unity Health Toronto<br>Tricco, Andrea; Li Ka Shing Knowledge Institute,<br>Abou-Setta, Ahmed; University of Manitoba Max Rady College of<br>Medicine; University of Manitoba, Community Health Sciences |
| <b>Primary Subject Heading</b>: | Oncology                                                                                                                                                                                                                                                                                                                                                                                                                                                                                                                                                                                                                                                                                                                                                                                 |
| Secondary Subject Heading:      | Evidence based practice, Health services research, Patient-centred medicine, Public health                                                                                                                                                                                                                                                                                                                                                                                                                                                                                                                                                                                                                                                                                               |
| Keywords:                       | ONCOLOGY, PREVENTIVE MEDICINE, PRIMARY CARE, PUBLIC HEALTH                                                                                                                                                                                                                                                                                                                                                                                                                                                                                                                                                                                                                                                                                                                               |
|                                 |                                                                                                                                                                                                                                                                                                                                                                                                                                                                                                                                                                                                                                                                                                                                                                                          |

SCHOLARONE™  
Manuscripts



I, the Submitting Author has the right to grant and does grant on behalf of all authors of the Work (as defined in the below author licence), an exclusive licence and/or a non-exclusive licence for contributions from authors who are: i) UK Crown employees; ii) where BMJ has agreed a CC-BY licence shall apply, and/or iii) in accordance with the terms applicable for US Federal Government officers or employees acting as part of their official duties; on a worldwide, perpetual, irrevocable, royalty-free basis to BMJ Publishing Group Ltd ("BMJ") its licensees and where the relevant Journal is co-owned by BMJ to the co-owners of the Journal, to publish the Work in this journal and any other BMJ products and to exploit all rights, as set out in our [licence](#).

The Submitting Author accepts and understands that any supply made under these terms is made by BMJ to the Submitting Author unless you are acting as an employee on behalf of your employer or a postgraduate student of an affiliated institution which is paying any applicable article publishing charge ("APC") for Open Access articles. Where the Submitting Author wishes to make the Work available on an Open Access basis (and intends to pay the relevant APC), the terms of reuse of such Open Access shall be governed by a Creative Commons licence – details of these licences and which [Creative Commons](#) licence will apply to this Work are set out in our licence referred to above.

Other than as permitted in any relevant BMJ Author's Self Archiving Policies, I confirm this Work has not been accepted for publication elsewhere, is not being considered for publication elsewhere and does not duplicate material already published. I confirm all authors consent to publication of this Work and authorise the granting of this licence.



1  
2  
3 **1 Interventions to improve early cancer diagnosis of symptomatic patients: A scoping review**  
4  
5  
6  
7

8 3 George N Okoli (0000-0002-6437-930X), Otto LT Lam, Viraj K. Reddy, Leslie Copstein, Nicole  
9

10 4 Askin, Anubha Prashad, Jennifer Stiff, Satya Rashi Khare, Robyn Leonard, Wasifa Zarin,  
11

12 5 Andrea C Tricco (0000-0002-4114-8971), Ahmed M Abou-Setta (0000-0003-0153-9916)  
13  
14  
15  
16

17 7 George N Okoli (senior researcher)<sup>1</sup>  
18

19 8 Otto LT Lam (systematic reviewer)<sup>1</sup>  
20

21 9 Viraj K Reddy (systematic reviewer)<sup>1</sup>  
22

23 10 Leslie Copstein (systematic reviewer)<sup>1</sup>  
24  
25

26 11 Nicole Askin (librarian)<sup>2</sup>  
27

28 12 Anubha Prashad (commissioner)<sup>3</sup>  
29

30 13 Jennifer Stiff (commissioner)<sup>3</sup>  
31

32 14 Satya Rashi Khare (commissioner)<sup>3</sup>  
33  
34

35 15 Robyn Leonard (commissioner)<sup>3</sup>  
36

37 16 Wasifa Zarin (research manager)<sup>4</sup>  
38

39 17 Andrea C Tricco (associate professor)<sup>4,5,6</sup>  
40

41 18 Ahmed M Abou-Setta (assistant professor)<sup>1,7</sup>  
42  
43  
44  
45  
46

47 20 <sup>1</sup>George and Fay Yee Centre for Healthcare Innovation, Max Rady College of Medicine, Rady  
48

49 21 Faculty of Health Sciences, University of Manitoba, Winnipeg, MB, Canada  
50

51 22 <sup>2</sup>Neil John Maclean Health Sciences Library, University of Manitoba, Winnipeg, MB, Canada  
52

53 23 <sup>3</sup>Canadian Partnership Against Cancer (the Partnership), Toronto, ON, Canada  
54  
55  
56  
57  
58  
59  
60

1  
2  
3 24 <sup>4</sup>Knowledge Translation Program, St. Michael's Hospital, Unity Health, Toronto, ON, Canada

4  
5 25 <sup>5</sup>Epidemiology Division and Institute for Health Policy, Management, and Evaluation, Dalla

6  
7  
8 26 Lana School of Public Health, University of Toronto, Toronto, ON, Canada

9  
10 27 <sup>6</sup>Queen's Collaboration for Health Care Quality, Joanna Briggs Institute (JBI) Centre of

11  
12 28 Excellence at Queen's University, ON, Canada

13  
14  
15 29 <sup>7</sup>Community Health Sciences, Max Rady College of Medicine, Rady Faculty of Health Sciences,

16  
17 30 University of Manitoba, Winnipeg, MB, Canada

18  
19 31

20  
21 32 **Correspondence to:** GN Okoli [George.Okoli@umanitoba.ca](mailto:George.Okoli@umanitoba.ca) George & Fay Yee Centre for

22  
23 33 Healthcare Innovation, 753 McDermot Avenue, Winnipeg, MB, R3Y 0T6, Canada

24  
25  
26 34

27  
28 35 **Funding:** This study was funded in part by the Canadian Partnership Against Cancer (the

29  
30 36 Partnership) and the Canadian Institutes of Health Research (CIHR) under the Strategy for

31  
32 37 Patient Oriented-Research (SPOR) initiative, through the SPOR Evidence Alliance. Andrea

33  
34 38 Tricco is funded by a Tier 2 Canada Research Chair in Knowledge Synthesis.

35  
36  
37 39

38  
39 40 **Competing interests declaration:** All authors declare that they have no conflicts of interest: no

40  
41 41 financial relationships with any organisations that might have an interest in the submitted work,

42  
43 42 and no relationships or activities that could appear to have influenced the submitted work.

44  
45  
46 43

47  
48 44 **Patient consent:** Not applicable

49  
50  
51 45

1  
2  
3 46 **Contributor and guarantor information:** Conceptualization (A Prashad, J Stiff, W Zarin, A  
4 Tricco); Methodology (GN Okoli, A Prashad, J Stiff, W Zarin, A Tricco & AM Abou-Setta);  
5 47 Tricco); Methodology (GN Okoli, A Prashad, J Stiff, W Zarin, A Tricco & AM Abou-Setta);  
6 48 Data acquisition (GN Okoli, OLT Lam, VK Reddy, L Copstein, N Askin, & AM Abou-Setta);  
7  
8 49 Formal analysis (GN Okoli); Draft manuscript (GN Okoli & AM Abou-Setta); Final manuscript  
9  
10 50 revisions (GN Okoli, OLT Lam, VK Reddy, L Copstein, N Askin, A Prashad, J Stiff, R Khare, R  
11  
12 51 Leonard, W Zarin, A Tricco & AM Abou-Setta); Guarantor (GN Okoli & AM Abou-Setta). The  
13  
14 52 corresponding author (the manuscript's guarantor) attests that all listed authors meet authorship  
15  
16 53 criteria and that no others meeting the criteria have been omitted.  
17  
18  
19  
20  
21  
22  
23

24 55 **Copyright/license for publication:** The Corresponding Author has the right to grant on behalf  
25  
26 56 of all authors and does grant on behalf of all authors, a worldwide licence to the Publishers and  
27  
28 57 its licensees in perpetuity, in all forms, formats and media (whether known now or created in the  
29  
30 58 future), to (i) publish, reproduce, distribute, display and store the Contribution, (ii) translate the  
31  
32 59 Contribution into other languages, create adaptations, reprints, include within collections and  
33  
34 60 create summaries, extracts and/or, abstracts of the Contribution, (iii) create any other derivative  
35  
36 61 work(s) based on the Contribution, (iv) to exploit all subsidiary rights in the Contribution, (v) the  
37  
38 62 inclusion of electronic links from the Contribution to third party material where-ever it may be  
39  
40 63 located, and, (vi) licence any third party to do any or all of the above.  
41  
42  
43  
44  
45  
46

47 65 **Transparency declaration:** The corresponding author affirms that the manuscript is an honest,  
48  
49 66 accurate, and transparent account of the study being reported; that no important aspects of the  
50  
51 67 study have been omitted; and that any discrepancies from the study as planned have been  
52  
53 68 explained.  
54  
55  
56  
57  
58  
59  
60

1  
2  
3 69 **Abstract**

4  
5 70 **Objectives:** To summarize the current evidence regarding interventions for accurate and timely  
6  
7 71 cancer diagnosis among symptomatic individuals.  
8  
9

10 72 **Design:** A scoping review following the Joanna Briggs Institute's methodological framework for  
11  
12 73 the conduct of scoping reviews and reported in accordance with the Preferred Reporting Items  
13  
14 74 for Systematic Reviews and Meta-analyses extension for scoping reviews (PRISMA-ScR)  
15  
16 75 checklist.  
17  
18  
19

20 76 **Data sources:** MEDLINE (Ovid), CINAHL (EBSCOhost) and PsycINFO (Ovid) bibliographic  
21  
22 77 databases, and websites of relevant organizations. Published and unpublished literature (grey  
23  
24 78 literature) of any study type in the English language were searched for from January 2017 to  
25  
26 79 January 2021.  
27  
28  
29

30 80 **Eligibility and criteria:** Study participants were individuals of any age presenting at clinics with  
31  
32 81 symptoms indicative of cancer. Interventions included practice guidelines, care pathways or  
33  
34 82 other initiatives focused on achieving pre-defined benchmarks or targets for wait times,  
35  
36 83 streamlined or rapid cancer diagnostic services, multidisciplinary teams, and patient navigation  
37  
38 84 strategies. Outcomes included accuracy and timeliness of cancer diagnosis.  
39  
40  
41

42 85 **Data extraction and synthesis:** We summarized findings graphically and descriptively.  
43  
44

45 86 **Results:** From 21,298 retrieved citations, 88 unique published articles and 16 unique unpublished  
46  
47 87 documents (on 18 study reports), met the eligibility for inclusion. About half of the published  
48  
49 88 literature and 83% of the unpublished literature were from the United Kingdom. Most of the  
50  
51 89 studies were on interventions in lung cancer patients. Rapid referral pathways and technology for  
52  
53 90 supporting and streamlining the cancer diagnosis process were the most studied interventions.  
54  
55  
56  
57  
58  
59

1  
2  
3 91 Interventions were mostly complex and organization-specific. Common themes among the  
4  
5 92 studies that concluded intervention was effective were multidisciplinary collaboration and the  
6  
7  
8 93 use of a nurse navigator.  
9

10  
11 94 **Conclusions:** Multidisciplinary cooperation and involvement of a nurse navigator may be unique  
12  
13 95 features to consider when designing, delivering, and evaluating interventions focused on  
14  
15 96 improving accurate and timely cancer diagnosis among symptomatic individuals. Future research  
16  
17 97 should examine the effectiveness of the interventions identified through this review.  
18  
19

20 98  
21  
22 99 **Keywords:** Early cancer diagnosis; Symptomatic patients; Interventions; Scoping review  
23  
24  
25  
26  
27  
28  
29  
30  
31  
32  
33  
34  
35  
36  
37  
38  
39  
40  
41  
42  
43  
44  
45  
46  
47  
48  
49  
50  
51  
52  
53  
54  
55  
56  
57  
58  
59  
60

### 100 **Strengths and limitations of this study**

- 101 • A knowledge synthesis librarian developed the search strategy for this review and this  
102 was peer reviewed by an independent knowledge synthesis librarian using the PRESS  
103 checklist.
- 104 • The literature search was limited to evidence from the last 4 years and only evidence  
105 from English-language publications and organizational websites.
- 106 • This review did not summarize effectiveness of interventions across cancer patient types  
107 and regions.
- 108 • We adhered to known guidelines and standards in the conduct and reporting of the  
109 review.
- 110 • In line with the JBI's guidance for the conduct of scoping reviews, we did not attempt to  
111 evaluate the quality of the included studies or provide an assessment of the quality of the  
112 evidence.

113

114

115

116

117

118

119

120

121

122

## 123 **Introduction**

124 Cancer is the second leading cause of death globally, with about 1 in 6 deaths attributable to the  
125 disease.<sup>1</sup> It was estimated in 2020 that over 19 million new cases and about 10 million deaths  
126 were attributable to cancer globally.<sup>2</sup> This rate is estimated to be over 28 million new cases by  
127 2040.<sup>2</sup> High Human Development Index (HDI) countries such as Canada will likely experience  
128 the greatest increase in incidence in absolute cancer burden, with an estimated over 4 million  
129 new cases more in 2040 compared with 2020.<sup>2</sup> This is mostly due to the growth and aging of the  
130 population and increasing prevalence of cancer risk factors.<sup>2</sup> Estimates from Canada alone  
131 suggest that every day 617 people in Canada will be diagnosed with cancer, with about 228 also  
132 dying from the disease.<sup>3</sup>

133         Although cancer can occur at any age, the risk of the disease increases with age.<sup>4</sup>  
134 Globally, cancer incidence rates vary, mostly because of differences in risk factors and early  
135 detection practices. Likewise, cancer death rates vary, partly because of differences in  
136 availability and effectiveness of cancer control strategies, such as early diagnosis and access to  
137 timely and effective treatment.<sup>2</sup> With timely diagnosis and treatment initiation, significant  
138 improvements can be made in the lives of cancer patients. Moreover, many cancers have higher  
139 curative and survival rates if diagnosed early. This means that cancer burden could be reduced  
140 substantially through early detection and management of patients who present with symptoms.<sup>5</sup>

141         When not diagnosed following early symptomatic presentation, cancer diagnosis often  
142 occurs at more advanced stages of the disease, when treatment may be less effective and cancer  
143 prognosis will be poor. Early cancer diagnosis of symptomatic patients entails carefully planned,  
144 well-integrated, culturally safe and equitable clinical evaluation and diagnostic services.<sup>5</sup> These

1  
2  
3 145 services should be designed to reduce delays in and barriers to diagnosis to allow detection at  
4  
5 146 earlier stages of the disease and commence treatment in a timely manner.  
6

7  
8 147 Various service-focused interventions to improve early cancer diagnosis of symptomatic  
9  
10 148 patients have been implemented in various jurisdictions with varying levels of success.

11  
12 149 Knowledge of the available interventions, strategies used to implement them, and how successful  
13  
14  
15 150 they might have been is necessary to inform the development, implementation, and evaluation of  
16  
17 151 effective early cancer diagnosis initiatives.  
18

19 152  
20  
21  
22  
23  
24  
25  
26  
27  
28  
29  
30  
31  
32  
33  
34  
35  
36  
37  
38  
39  
40  
41  
42  
43  
44  
45  
46  
47  
48  
49  
50  
51  
52  
53  
54  
55  
56  
57  
58  
59  
60



## 153 **Methods**

154 This report is a summary of the study commissioned by the Canadian Partnership Against Cancer  
155 (the Partnership). The Partnership contributed to specifying the study objectives and questions,  
156 and in summarizing the evidence.

157 We undertook a scoping review following the Joanna Briggs Institute's (JBI's) guidance  
158 for the conduct of scoping reviews.<sup>6</sup> This framework includes defining and aligning the  
159 objective(s) and question(s) for the review, developing and aligning the inclusion criteria with  
160 the review objective(s) and question(s), and describing the planned approach to evidence  
161 searching. It also includes selecting, extracting, and charting of evidence; summarizing the  
162 evidence in relation to the objectives and questions; and consultation of information scientists,  
163 librarians, and/or experts throughout the process. **Appendix 1** is the work plan approved by the  
164 Partnership for the scoping review.

165 We summarized the current evidence regarding interventions focused on improving  
166 accurate and timely cancer diagnosis among symptomatic individuals, including practice  
167 guidelines, care pathways or targets for wait times, streamlined or rapid diagnostic services,  
168 multidisciplinary teams, and patient navigation strategies. We also summarized innovative  
169 interventions (for example, those with a technological component) and approaches to seamless  
170 (minimally disruptive) care of symptomatic individuals and identified performance metrics that  
171 can be used to measure improvements in the pre-diagnosis phase. Additionally, we summarized  
172 the key points of the patient trajectory from initial symptom presentation to cancer diagnosis.

173 We report our findings in accordance with the Preferred Reporting Items for Systematic  
174 Reviews and Meta-analyses extension for Scoping Reviews (PRISMA-ScR) checklist.<sup>7</sup>

175

1  
2  
3 176 ***Search strategy***  
4

5 177 A knowledge synthesis librarian (NA) designed a search strategy for MEDLINE (Ovid). This  
6  
7 178 search strategy was peer-reviewed independently by another knowledge synthesis librarian using  
8  
9  
10 179 the Peer Review of Electronic Search Strategies (PRESS) checklist.<sup>8</sup> The revised search strategy  
11  
12 180 was then adapted for Cumulative Index to Nursing and Allied Health Literature (CINAHL)  
13  
14 181 (EBSCOhost) and PsycINFO (Ovid) bibliographic databases. The search strategy for each of the  
15  
16 182 databases is presented in the appendices (**Appendix 2 - 4**). In addition to searching bibliographic  
17  
18 183 databases, we searched websites of relevant organizations and professional bodies (**Appendix 5**)  
19  
20 184 and hand-searched reference lists of potentially relevant publications.  
21  
22  
23  
24 185

25  
26 186 ***Study selection criteria and data extraction***  
27

28 187 We sought to summarize practice guidelines, care pathways and initiatives such as  
29  
30 188 benchmarks/targets for wait times, streamlined or rapid diagnostic services, multidisciplinary  
31  
32 189 teams, and patient navigation strategies that have been found to enhance accurate and timely  
33  
34 190 cancer diagnosis in symptomatic individuals. We also sought to summarize the leading  
35  
36 191 interventions to seamless care in the cancer pre-diagnosis phase, performance metrics that can be  
37  
38 192 used to measure the suspicion to diagnosis phase and how these metrics have been used. Further,  
39  
40 193 we sought for specific considerations for underserved populations in studies, including  
41  
42 194 considerations for Indigenous, rural, and remote populations.  
43  
44  
45

46  
47 195 Published (peer-reviewed) and unpublished (grey literature) articles in the English  
48  
49 196 language from January 2017 to January 2021 were included. The decision to include articles  
50  
51 197 from 2017 was because the Partnership had previously summarized prior evidence, not included  
52  
53 198 in this current report.<sup>9</sup> Study participants were individuals of any age presenting in any clinical  
54  
55  
56  
57  
58  
59  
60

1  
2  
3 199 settings with symptoms. Interventions included practice guidelines, care pathways or other  
4  
5 200 initiatives focused on achieving pre-defined benchmarks or targets for wait times, streamlined or  
6  
7 201 rapid diagnostic services, multidisciplinary teams, and patient navigation strategies. Outcomes  
8  
9 202 included accuracy and timeliness of cancer diagnosis.

10  
11  
12 203 All retrieved citations from the literature search were imported and managed in EndNote  
13  
14 204 (Version X9). One reviewer (GNO or OLTL or VKR or LC) screened each citation for  
15  
16 205 eligibility. Two reviewers (GNO, OLTL, VKR, and LC in pairs) independently screened the full  
17  
18 206 texts of relevant citations and reviewed the reference list of the included full-text articles for  
19  
20 207 potentially relevant citations. Disagreements between the reviewers were resolved through  
21  
22 208 discussion or involvement of a third reviewer (AMAS). The number of screened citations and  
23  
24 209 both the number and reason for exclusion of full-text articles were documented. One reviewer  
25  
26 210 (GNO or OLTL or VKR or LC) performed data extraction and charting, and another reviewer  
27  
28 211 (GNO or OLTL or VKR or LC) independently checked the extracted and charted data for errors.  
29  
30 212 Disagreements between the reviewers were resolved through discussion or involvement of a third  
31  
32 213 reviewer (AMAS).

### 33 34 35 214 36 37 38 39 40 215 ***Data synthesis and analysis***

41  
42 216 Characteristics of the included published articles are presented in a tabular form and descriptive  
43  
44 217 analysis is reported graphically and descriptively. Characteristics of the included unpublished  
45  
46 218 articles are reported descriptively only. Relevant findings from the review of both published and  
47  
48 219 unpublished articles are summarized separately and descriptively, by review question, focusing  
49  
50 220 on the interventions related to each question. Interventions are grouped as centralized or  
51  
52 221 coordinated diagnostic service; interventions to enhance diagnostic services; multidisciplinary  
53  
54  
55  
56  
57  
58  
59  
60

1  
2  
3 222 team; patient navigation; rapid referral pathway; remote or rural populations-focused;  
4  
5 223 standardized care pathway; support for primary care providers; target or benchmark; and  
6  
7  
8 224 technology to support the diagnostic process. These interventions are defined in **Appendix 6**.  
9  
10 225 Effectiveness of an intervention was author-defined.  
11

12 226

13  
14  
15 227 ***Patient and public involvement***

16  
17 228 There was no active engagement of patients and/or members of the public.  
18  
19  
20  
21  
22  
23  
24  
25  
26  
27  
28  
29  
30  
31  
32  
33  
34  
35  
36  
37  
38  
39  
40  
41  
42  
43  
44  
45  
46  
47  
48  
49  
50  
51  
52  
53  
54  
55  
56  
57  
58  
59  
60

## 229 Results

230 Out of a total of 21,298 retrieved citations, 88 unique published articles<sup>10-97</sup> and 16 unique  
231 unpublished (grey literature representing 18 different reports)<sup>98-113</sup> met the inclusion criteria. The  
232 article selection process is detailed below (**Figure 1**). Fifty-seven of the published articles were  
233 from Europe, 14 articles from North America, 9 articles from Oceania, 3 articles each from  
234 Africa and Asia, and one article each from the Middle East and South America. Almost half of  
235 these articles (n = 40) were from the United Kingdom (UK) alone. A geographic map of  
236 published articles is shown in **Figure 2**.

237 Of the 18 unpublished reports (16 articles), 83% were from the UK, 11% from Canada  
238 and 6% from the United States of America (USA). Forty percent (n = 35) of the published  
239 articles were for case-control studies, 29% (n = 26) for cross-sectional studies, 22% (n = 19) for  
240 before-and-after studies, 7% (n = 6) for randomized controlled studies, and 1% (n = 1) each for  
241 guideline development and mixed methods studies. In terms of the unpublished articles, 89% (n  
242 = 16) were before-and-after studies and the rest (n = 2) were cross-sectional studies. **Figure 3**  
243 shows the distribution of the cancer types reported by the published articles; approximately 30%  
244 (n = 26) reported on multiple cancer types, while the rest reported on specific cancer types, of  
245 which lung cancer was the most frequent (about 23% of the publications (n = 20)). Of the  
246 unpublished articles, half reported on lung cancer, 28% on multiple cancer types, 11% on breast  
247 cancer, and 5.5% each on brain and gastrointestinal cancers.

248 **Figure 4** shows the distribution of intervention types across the published articles. Nearly  
249 20% of the published articles were on rapid referral pathway interventions while less than 1%  
250 each were on multidisciplinary team, patient navigation, and remote/rural-focused interventions.  
251 Of the unpublished articles, half reported on rapid referral pathway interventions, 11% each

1  
2  
3 252 reported on standardized care pathway, target/ benchmark for wait times, and technology to  
4  
5 253 support the diagnosis process, and 5.5% each reported on centralized or coordinated diagnostic  
6  
7 254 service and interventions to enhance diagnostic services. Most of the published articles (94%; n  
8  
9 = 83) reported a performance metric used to measure an improvement in the suspicion to  
10  
11 255 diagnosis phase of cancer.  
12  
13 256

14  
15 257 Eighty-three percent (n = 73) of the articles reported either a practice guideline, care  
16  
17 258 pathway or an initiative such as benchmark/target for wait times, streamlined or rapid diagnostic  
18  
19 259 service, multidisciplinary team development, and a patient navigation strategy to enhance  
20  
21 260 accurate and timely cancer diagnosis. Thirty-one percent (n = 27) of the articles reported (not  
22  
23 261 explicitly) on a key point of care as patients navigate the health system, from initial suspicion to  
24  
25 262 diagnosis of cancer. Twenty-nine percent (n = 25) of the articles reported on a leading innovative  
26  
27 263 intervention or approach to seamless care in the pre-cancer diagnosis phase, while 4.5% (n = 4)  
28  
29 264 of the articles reported on some form of consideration for underserved populations. Some of the  
30  
31 265 articles reported on two or more of the above. Details of relevant characteristics of the published  
32  
33 266 articles are presented in **Table 1** (those reporting effective interventions) and **Appendix 7** (those  
34  
35 267 reporting ineffective interventions) and **Appendix 8** (those focused on remote/and rural  
36  
37 268 populations).  
38  
39  
40  
41  
42  
43

#### 44 270 **Initiatives to enhance accurate and timely cancer diagnosis**

45  
46 271 This review identified various initiatives to enhance accurate and timely cancer diagnosis. These  
47  
48 272 were often designed, developed, and implemented often with the involvement of primary care  
49  
50 273 providers (physicians and nurses), but not patients. These initiatives are grouped into related  
51  
52 274 interventions and the evidence regarding each intervention is discussed below.  
53  
54  
55

56 275

1  
2  
3 276 ***Centralized or coordinated diagnostic services***  
4

5 277 Nine published articles on centralized or coordinated diagnostic services for adult lung cancer (n  
6 = 5) and breast cancer (n = 4) patients were identified.<sup>20,23,32,33,44,54-56,93</sup> Five were from  
7  
8 278 Canada,<sup>23,33,44,54,55</sup> and there was one each from Denmark,<sup>20</sup> New Zealand,<sup>93</sup> South Africa,<sup>56</sup> and  
9  
10 279 the UK<sup>32</sup>. The focus and metrics for assessment of the effectiveness of these diagnostic services  
11  
12 280 varied, but all were found to be effective. These include the rapid access to pulmonary  
13  
14 281 investigation and diagnosis (RAPID) program in Wythenshawe Hospital, Manchester, UK with  
15  
16 282 expedited (next working day) computed tomography (CT) and reporting in suspected lung cancer  
17  
18 283 cases,<sup>32</sup> and the Thoracic Triage Panel in a tertiary care centre in St. John's, Newfoundland,  
19  
20 284 Canada, a multidisciplinary centralized referral program, whose key components include a nurse  
21  
22 285 navigator who coordinates patient care and act as the contact person for patients and clinicians  
23  
24 286 involved in the program, weekly multidisciplinary (thoracic specialists) meetings, and regular  
25  
26 287 communications with the primary care provider.<sup>23</sup> The diagnostic services also include the rapid  
27  
28 288 investigation clinic in a tertiary health centre in Montreal, Canada established to coordinate and  
29  
30 289 accelerate the workup of patients with suspected lung cancer,<sup>33</sup> the improved respiratory fast  
31  
32 290 track clinic (RFTC) in Northland district of New Zealand that comprises reserved slots for CT  
33  
34 291 for those referred with a suspicion of lung cancer, bronchoscopy slots and CT-guided biopsy,<sup>93</sup>  
35  
36 292 and the Danish lung cancer package at the Center for Lung Cancer, Odense University Hospital,  
37  
38 293 Odense, Denmark, a fast-track diagnostic pathway in the hospital setting.<sup>20</sup> Further, there was the  
39  
40 294 rapid access breast clinic in British Columbia, Canada that provides close collaboration between  
41  
42 295 clinicians and radiologists, facilitated by clinical pathways and nurse navigation,<sup>54,55</sup> the  
43  
44 296 diagnostic assessment units in Ontario, Canada, focusing on diagnosis at a dedicated breast  
45  
46 297 assessment unit,<sup>44</sup> and the breast clinic at a tertiary hospital in Western Cape Province of South  
47  
48  
49  
50  
51  
52  
53  
54  
55  
56  
57  
58  
59  
60

1  
2  
3 299 Africa, an open-access one-stop diagnostic breast clinic where women may present with a letter  
4  
5 300 from a primary level provider (nurse practitioner or doctor) and receive the same day clinical and  
6  
7 301 cytological evaluation with referral to the combined breast clinic if the breast cytology is positive  
8  
9  
10 302 for malignancy.<sup>56</sup>

11  
12 303 In addition to the above, one unpublished article was identified.<sup>113</sup> This was for the Breast  
13  
14 304 ACCESS Project in Ohio, USA, which scheduled patients for a surgical consult within 2 days  
15  
16 305 and a biopsy within 5 days after the surgical consult, with the aim of reducing wait times  
17  
18 306 between abnormal diagnostic mammogram findings to biopsy from 26 to 7 days (7-day ACCESS  
19  
20 307 goal).

21  
22 308

### 23 24 309 *Interventions to enhance diagnostic services*

25  
26 310 Twelve published articles on interventions to enhance diagnostic services were  
27  
28 311 identified.<sup>10,17,24,52,53,64,75,77,78,80,83,94</sup> These articles were focused on varied cancer types; four on  
29  
30 312 multiple cancers, two on lung cancer, two on skin cancer, and one each on breast,  
31  
32 313 gastrointestinal, haematological and prostate cancers. Four articles were from the UK,<sup>17,52,53,78</sup>  
33  
34 314 two articles each from Canada<sup>24,64</sup> and Sweden,<sup>10,80</sup> and one article each from Botswana,<sup>94</sup>  
35  
36 315 Columbia,<sup>75</sup> Indonesia,<sup>77</sup> and the USA.<sup>83</sup> The focus and metrics for assessment of the  
37  
38 316 effectiveness of the interventions varied across the publications, and while most were effective,  
39  
40 317 one intervention for lung cancer and one intervention for skin cancer in the UK<sup>53</sup> and Sweden<sup>10</sup>,  
41  
42 318 respectively, were ineffective. The effective interventions were reducing diagnosis through  
43  
44 319 emergency presentation by improving general practice referral in England, UK,<sup>52</sup> the guided  
45  
46 320 personal quality of life (QoL) feedback intervention during the Cancer Research UK's North  
47  
48 321 West regional summer roadshow in Manchester, UK, aimed at offering guided feedback about  
49  
50 322 personal QoL to adults with potential cancer symptoms, living in deprived communities to



1  
2  
3 323 promote help seeking in primary care among the communities,<sup>78</sup> the mandatory primary care  
4  
5 324 access to faecal immunochemical testing (FIT) in Nottingham, UK, integrated with the 2-week  
6  
7 325 wait pathway, aimed at improving gastrointestinal cancer diagnosis rather than relying on age  
8  
9  
10 326 and symptoms alone,<sup>17</sup> the Stronach Regional Cancer Centre lung diagnostic assessment program  
11  
12 327 (DAP) at Southlake Regional Health Centre, Ontario, Canada, aimed at using learnings from a  
13  
14 328 Lean improvement event to provide coordinated, expedited care for all patients undergoing a  
15  
16 329 possible lung cancer diagnosis and to achieve/improve upon the provincial wait time target from  
17  
18 330 consultation to diagnosis for lung cancer patients,<sup>24</sup> the nurse practitioner-led lymphoma rapid  
19  
20 331 diagnosis clinic in a tertiary care cancer center (Princess Margaret Cancer Centre, part of  
21  
22 332 University Health Network) in Ontario, Canada, aimed at reducing wait times for a definitive  
23  
24 333 diagnosis of lymphoma,<sup>64</sup> the expedited one-stop prostate cancer diagnosis using advanced  
25  
26 334 imaging and biopsy techniques in a health institution (name not reported) in the USA, aimed at  
27  
28 335 expediting prostate cancer diagnosis.<sup>83</sup> There were also the Swedish Diagnostic Center at the  
29  
30 336 Central Hospital of Kristianstad, Sweden, introduced as a separate outpatient unit within the  
31  
32 337 Department of Internal Medicine to expedite diagnostics,<sup>80</sup> the Partners for Cancer Care and  
33  
34 338 Prevention action plan in Cali, Columbia, aimed at improving access to a coordinated program of  
35  
36 339 screening and early diagnosis of breast and cervical cancers in three health care centers that serve  
37  
38 340 subsidized populations,<sup>75</sup> the dermatology-led quality improvement initiatives in Gaborone,  
39  
40 341 Botswana, aimed at improving multispecialty care coordination,<sup>94</sup> and the culturally sensitive,  
41  
42 342 narrative self-help intervention named PERANTARA (PEngantar peRAwataN kesehaTAn  
43  
44 343 payudaRA [translated as introduction to breast health treatment]) across four hospitals in  
45  
46 344 Bandung, West Java, Indonesia, aimed at reducing time to diagnosis in women with breast  
47  
48 345 cancer symptoms.<sup>77</sup> In addition to the above, one unpublished article on the Accelerate,  
49  
50  
51  
52  
53  
54  
55  
56  
57  
58  
59  
60

1  
2  
3 346 Coordinate, Evaluate (ACE) program in the UK was identified.<sup>100</sup> This program was an early  
4  
5 347 cancer diagnosis initiative and focused on testing innovations that either identify individuals at  
6  
7  
8 348 high risk of cancer earlier or streamline diagnostic pathways.

9  
10 349 The ineffective interventions were the standardized care diagnostic pathway at the  
11  
12 350 Department of Clinical Pathology, Akademiska University Hospital in Uppsala, Sweden  
13  
14 351 (introduced by the Swedish health authorities to eliminate unwanted delay in the diagnostics of  
15  
16 352 melanoma)<sup>10</sup> and the 4-week national lung cancer symptom awareness campaign in Wales, UK,  
17  
18  
19 353 aimed at increasing urgent suspected cancer referrals and clinical outcomes.<sup>53</sup>  
20

21  
22 354

### 23 355 *Multidisciplinary team*

24  
25  
26 356 Three multidisciplinary team lung cancer approaches were identified from published articles:  
27  
28 357 from the USA<sup>68,85</sup> and Australia.<sup>50</sup> The focus and metrics for assessment of the effectiveness of  
29  
30 358 the approaches varied across the publications. One approach from the USA was found to be  
31  
32 359 effective,<sup>68</sup> whereas the others were found to be ineffective. The effective approach was the lung  
33  
34 360 cancer strategist program, a thoracic surgeon-guided, multidisciplinary (disciplines not reported)  
35  
36 361 care program in hospitals in Massachusetts, USA, aimed at improving timeliness of lung cancer  
37  
38 362 diagnosis and treatment.<sup>68</sup> The ineffective approaches were the pre-diagnosis multidisciplinary  
39  
40 363 tumour board (physicians from radiology, medical and radiation oncology, and  
41  
42 364 pulmonary medicine) discussions in a clinic in Cleveland, USA aimed at improving the  
43  
44 365 timeliness of diagnostic evaluation in lung cancer,<sup>85</sup> and the Victorian lung cancer service  
45  
46 366 redesign project in Victoria, Australia, which involved multidisciplinary (patients, governance,  
47  
48 367 administration, clinicians and health information services) evaluation aimed at quality  
49  
50 368 improvement collaborative on timeliness and management in lung cancer.<sup>50</sup> In addition, nine  
51  
52 369 unpublished articles from the UK were identified.<sup>99,101-103,106,108,109,112</sup> These included four  
53  
54  
55  
56  
57  
58  
59  
60

1  
2  
3 370 articles regarding a “straight to CT access” pathway, on community pharmacy direct referral to  
4  
5 371 lung cancer pathway, rapid colorectal diagnostic pathway, and optometrist direct referral to  
6  
7 372 neuroscience pathway. All but the chest x-ray pathway<sup>109</sup> were found to be effective.  
8  
9

10 373

### 11 374 *Standardized care pathways*

12  
13  
14 375 Eleven published articles on standardized care pathways were identified.<sup>11,12,26,35,39,41,49,59,63,70,71</sup>

15  
16 376 These articles were focused on varied cancer types (4 each for multiple cancers, and 1 each for  
17  
18 377 ear-nose-throat, urinary tract, and gastrointestinal cancers). Three articles were from

19  
20  
21 378 Denmark,<sup>26,39,41</sup> two from the UK,<sup>35,70</sup> and one each from Canada,<sup>59</sup> Norway,<sup>49</sup> Sweden,<sup>63</sup>

22  
23 379 Spain,<sup>12</sup> and Saudi Arabia.<sup>11</sup> The publications were on adult patient populations with one also

24  
25 380 involving paediatric patients. The focus and metrics for assessment of the effectiveness of the

26  
27 381 pathways varied across the publications. The main effective pathways were the national

28  
29 382 diagnostic cancer pathway in Norway, with recommended maximum limits for time spent in the

30  
31 383 diagnostic process as well as mandatory reporting of the actual time intervals for all patients with

32  
33 384 suspected lung cancer,<sup>49</sup> and the standardized triage process in the Southeastern Ontario, Canada,

34  
35 385 which entailed a twice-weekly nurse–physician triage, preordered staging tests and scheduling

36  
37 386 according to urgency, redirection and recommendations for inappropriate referrals, and new

38  
39 387 small nodule clinic.<sup>59</sup> Other main effective pathways were the standardized diagnostic pathway

40  
41 388 for suspected urothelial cancer initiated by primary healthcare providers and specialists in Skane

42  
43 389 County, Sweden, and comprises CT urography, urinary cytology and cystoscopy,<sup>63</sup> the early

44  
45 390 colonoscopy track (within 30 days from referral) in a tertiary referral hospital in Tenerife,

46  
47 391 Spain,<sup>12</sup> and the fast-track cancer care pathway in Denmark (national), with maximum acceptable

48  
49 392 time thresholds from referral to diagnosis and treatment.<sup>39</sup> In addition, two unpublished articles

1  
2  
3 393 from Canada<sup>111</sup> and the UK<sup>98</sup> focusing on breast and lung cancers, respectively, were identified.  
4  
5 394 These were the Alberta Health Services Diagnostic Assessment Pathway and the Somerset  
6  
7 395 Integrated Lung Cancer Pathway. While the Canadian pathway was found to be effective, the  
8  
9  
10 396 pathway from the United Kingdom was not effective.  
11

12 397

### 14 398 ***Support for primary care providers***

16  
17 399 There were four publications on support for primary care providers (PCP), all from the  
18  
19 400 UK.<sup>27,31,48,97</sup> Two were focused on multiple cancer types, and one each focused on  
20  
21 401 gastrointestinal and brain cancers. The publications were on adult patient populations with one  
22  
23 402 being also involving paediatric patients. The focus and metrics for assessment of the  
24  
25 403 effectiveness of the support packages (all educational and informational) varied across the  
26  
27 404 publications. None of the support packages was found to be effective, with the identified  
28  
29  
30  
31 405 common theme being a lack of awareness of referral guidelines and associated knowledge by  
32  
33 406 GPs. These ineffective support packages were the use of the Kernick and NICE guidelines as  
34  
35 407 evidence-based support to assist primary care physicians in identifying patients most at risk of  
36  
37  
38 408 having a brain tumour, but also on the fastest route to achieve diagnosis (example, direct access  
39  
40 409 imaging versus urgent secondary care referral) in Scotland, the UK,<sup>97</sup> the use of the national  
41  
42 410 cancer waiting times monitoring dataset for system performance assessment by primary care  
43  
44 411 physicians in England, the UK,<sup>27</sup> and the use of safety netting by primary care physicians in  
45  
46  
47 412 Oxfordshire, UK to ensure that patients are monitored until their symptoms or signs are  
48  
49 413 explained, and to guard against delays in diagnosis.<sup>31</sup>  
50

51 414

### 53 415 ***Target or benchmark for wait times***

1  
2  
3 416 There were eight published articles related to targets or benchmarks for wait  
4  
5 417 times.<sup>15,42,43,69,73,81,88,96</sup> Three of these articles were from the UK,<sup>69,73,81</sup> two articles from  
6  
7 418 Australia,<sup>42,88</sup> and one article each from China,<sup>43</sup> Sweden,<sup>96</sup> and New Zealand<sup>15</sup>. These  
8  
9 419 publications were focused on varied cancer types (2 each for multiple, lung and gastrointestinal  
10  
11 420 cancers, and 1 each for prostate and skin cancers), and were on adult patient populations, with  
12  
13 421 one publication involving paediatric patients. The focus and metrics for assessment of the  
14  
15 422 effectiveness of the target or benchmarks varied across the publications, and all but two  
16  
17 423 targets/benchmarks<sup>15,88</sup> were found to be effective. The effective targets or benchmarks were the  
18  
19 424 28-day faster diagnosis standard in the National Health Service England, UK, defined as the time  
20  
21 425 within which the patient is informed whether they do or do not have cancer,<sup>73</sup> the fast-track  
22  
23 426 diagnostic workup for men with suspected prostate cancer at the Urology Department at Orebro  
24  
25 427 University Hospital in Sweden, which entailed targeting the shortest possible waiting-time for a  
26  
27 428 diagnostic workup process,<sup>96</sup> and the optimal timeframes for referral and diagnosis of lung lesion  
28  
29 429 at Latrobe Regional Hospital in Victoria, Australia established by the National Cancer Expert  
30  
31 430 Reference Group as part of the optimal care pathway for people with lung cancer.<sup>42</sup> The  
32  
33 431 ineffective targets or benchmarks was the New Zealand Ministry of Health's "faster cancer  
34  
35 432 treatment" standards of service provision for melanoma patients, with a target of  
36  
37 433 histopathological diagnosis of melanoma reported within five working days in 80% of cases, and  
38  
39 434 all cases reported in 10 working days.<sup>15</sup> In addition, two unpublished articles from Canada<sup>105</sup> and  
40  
41 435 the UK<sup>107</sup> focusing on multiple cancers were identified, and these were the "2-week wait"  
42  
43 436 benchmark in the UK (already discussed under rapid referral pathways) and the Canadian Breast  
44  
45 437 Cancer Screening Network targets for diagnostic intervals:  $\geq 90\%$  of abnormal screens to be  
46  
47  
48  
49  
50  
51  
52  
53  
54  
55  
56  
57  
58  
59  
60

1  
2  
3 438 resolved within 5 weeks if no biopsy is required and  $\geq 90\%$  within 7 weeks if a tissue biopsy is  
4  
5 439 required.

6  
7  
8 440

9  
10 441 ***Innovative interventions to enhanced care in cancer pre-diagnosis phase***

11  
12 442 This review identified 17 published articles related to technological interventions for enhanced  
13  
14 443 care in the pre-diagnosis phase of cancer.<sup>16,21,22,29,37,38,51,57,58,62,65,66,79,82,87,89,91</sup> Ten of these articles  
15  
16 444 were from the UK,<sup>22,29,37,38,51,57,62,65,66,91</sup> two articles were from New Zealand,<sup>79,82</sup> and one article  
17  
18 445 each was from Denmark,<sup>89</sup> Netherlands,<sup>21</sup> Italy,<sup>16</sup> India,<sup>87</sup> and Spain.<sup>58</sup> These publications  
19  
20 446 focused on varied cancer types in adult patient populations, with two also involving paediatric  
21  
22 447 patients. The interventions had little patient input in their design, development, or  
23  
24 448 implementation. The focus and metrics for assessment of the effectiveness of the interventions  
25  
26 449 varied across the publications. The main identified interventions were the use of teledermatology  
27  
28 450 in skin cancer diagnosis. This involved the taking of images, including dermoscopy by GPs and  
29  
30 451 sending them for evaluation to specialized dermatologists.<sup>38,62,79,89</sup> The process is embedded in  
31  
32 452 an e-referral system developed in Auckland, New Zealand for suspected skin malignancy,<sup>82</sup> and  
33  
34 453 included teledermatology images triaged as confirmed, likely or suspected melanoma, the use of  
35  
36 454 a web-based referral tool for head and neck cancers at two different hospitals in Birmingham,  
37  
38 455 West Midlands, and Wexham, Berkshire, UK.<sup>51</sup> There was also the use of the Digitally  
39  
40 456 Assembled Referral Toolkit (DART) for 2-week referral, accessible via a cloud-based template,  
41  
42 457 which contained new referral forms native to GP clinical systems in the UK.<sup>29</sup> Additionally,  
43  
44 458 there was the use of an electronic straight-to-test pathway at a large tertiary referral hospital in  
45  
46 459 England, UK to remove hospital-based triage from suspected colorectal cancer pathways; this  
47  
48 460 allows GPs to book tests supported by a decision aid based on the NICE guidance, thus,  
49  
50  
51  
52  
53  
54  
55  
56  
57  
58  
59  
60

1  
2  
3 461 eliminating the need for a standard referral form or triage process.<sup>65</sup> Further, there was the use of  
4  
5 462 electronic clinical decision support for melanoma in four general practices in the Southeast of  
6  
7 463 England, UK, which involved the use of an electronic-based 7-point checklist to assess  
8  
9  
10 464 pigmented lesions,<sup>66</sup> the use of machine learning algorithms in Newcastle, UK to classify  
11  
12 465 patients referred on the 2-week wait pathway for suspected head and neck cancer into different  
13  
14 466 diagnostic groups, albeit very broad ones: cancer and non-cancer,<sup>57</sup> the use of nurse-led  
15  
16 467 assessments to evaluate certain groups of patients suspected to have bowel cancer in England,  
17  
18 468 the UK,<sup>22</sup> and the use of varied smartphone-based skin and oral self-monitoring and screening  
19  
20 469 applications, in England, UK<sup>91</sup> and in the India,<sup>87</sup> respectively. In addition, two unpublished  
21  
22 470 articles from the UK were identified.<sup>106,110</sup> These were for a cancer decision support tool  
23  
24 471 (computer-based programs integrated into a GP's usual patient management system) in  
25  
26 472 Gateshead, London, and a clinical web portal (CWP) electronic system in Manchester, England,  
27  
28 473 with the fundamental part of the CWP being that local clinicians had to take personal  
29  
30 474 responsibility for data input.  
31  
32  
33  
34  
35  
36  
37

#### 38 476 *Performance metrics to measure improvements in suspicion to diagnosis phase*

39  
40 477 Varied performance metrics were identified by this review. The main metrics are summarized  
41  
42 478 according to intervention type (**Appendix 9**). While performance metrics appear to be mainly  
43  
44 479 intervention-dependent, time from presentation in primary care to diagnosis and from referral  
45  
46 480 from primary care to specialist consultation, appear to be the most consistent metrics used for  
47  
48 481 evaluation. Performance metrics to measure patients' experience mainly centered on patients'  
49  
50 482 satisfaction and quality of life.  
51  
52  
53

54 483

1  
2  
3 484 ***Specific considerations for underserved populations***  
4

5 485 Four published articles focused on issues related specifically to underserved populations, with all  
6  
7 486 focused on remote/rural populations.<sup>18,30,60,88</sup> These publications were from the UK,<sup>60</sup>  
9  
10 487 Australia,<sup>30,88</sup> and Mexico.<sup>18</sup> A fifth publication only used the patients' area of residence as part  
11  
12 488 of their model.<sup>95</sup> All of the publications were on multiple cancer types and adult populations,  
13  
14 489 although one included a paediatric population. The specific considerations for underserved  
15  
16 490 populations and the evidence regarding them included a publication from Scotland, the UK, a  
17  
18 491 national audit of cancer diagnosis in Scottish and English general practices, exploring and  
19  
20 492 comparing patient characteristics, diagnostic intervals, and routes to diagnosis,<sup>60</sup> the publication  
21  
22 493 from New South Wales, Australia on a study that examined geographic variations in time  
23  
24 494 intervals leading up to treatment for head and neck cancer, with assessment of differences based  
25  
26 495 on remoteness of residence (regional/remote or metropolitan) at two tertiary referral centres,<sup>88</sup> a  
27  
28 496 publication from Mexico City, Mexico on evaluation of a patient navigation program to reduce  
29  
30 497 referral time to cancer centers for underserved patients with a suspicion or diagnosis of cancer at  
31  
32 498 a public general hospital,<sup>18</sup> and a publication from Western Australia, a cluster-randomized  
33  
34 499 controlled trial of a complex intervention to reduce time to diagnosis in rural cancer patients with  
35  
36 500 the aim of measuring the effect of community-based symptom awareness and general practice-  
37  
38 501 based educational interventions on the time to diagnosis in rural patients presenting with breast,  
39  
40  
41  
42  
43  
44 502 prostate, colorectal or lung cancer.<sup>30</sup>  
45  
46

47 503  
48  
49  
50  
51  
52  
53  
54  
55  
56  
57  
58  
59  
60



## 504 **Discussion**

505 This scoping review of 88 published and 16 unpublished documents from January 2017 to  
506 January 2021 summarizes the evidence on current interventions focused on improving accurate  
507 and timely cancer diagnosis among symptomatic individuals. The identified articles were from  
508 varied study designs including case-control (most common), cross-sectional, before-and-after,  
509 and mixed methods studies, and randomized controlled trials. There was little evidence to  
510 suggest that patients were involved in the design, development, or implementation of  
511 interventions to enhanced care in cancer pre-diagnosis phase.

512 The evidence suggests that interventions focused on improving accurate and timely  
513 cancer diagnosis among symptomatic individuals are active topics of research. The UK appears  
514 to be championing this area of research, contributing about half of all identified published  
515 literature and 83% of the identified unpublished literature. Of the specific cancer patient types,  
516 lung cancer patients appear to be the most researched, ranking highest among the patient  
517 populations of published and unpublished literature. Of the studied interventions, rapid referral  
518 pathways and technology for supporting and streamlining the diagnosis process were the two  
519 most reported interventions. Overall, varied national and regional centralized or coordinated  
520 diagnostic services, interventions to enhance diagnostic services, multidisciplinary team  
521 approaches, patient navigation approaches, rapid referral pathways, standardized care pathways,  
522 support for primary care providers, target or benchmarks, technologies to support diagnosis  
523 process, and insights regarding variations between remote/rural and urban populations have been  
524 reported although there were no articles that focused specifically on Indigenous populations.  
525 Many of these intervention types could be adapted to suit different health systems and  
526 jurisdictions around the world.

1  
2  
3 527 The interventions mostly comprised multiple interventions/ changes to the healthcare  
4  
5 528 pathway. As such, the interventions examined varied widely across the studies. This was true  
6  
7  
8 529 even when applied to the same cancer patient populations and in the same jurisdictions/  
9  
10 530 countries, including those where an intervention was part of the standard care pathway. As such,  
11  
12 531 it is difficult, perhaps impossible, to identify one main approach alone that drives an  
13  
14 532 intervention. Methodological approaches also varied significantly with regard to outcome  
15  
16 533 assessment. A common theme among the effective centralized or coordinated diagnostic  
17  
18 534 services, interventions to enhance diagnostic services, patient navigation approaches, and  
19  
20 535 standardized care pathways is multidisciplinary collaboration and the involvement of a nurse  
21  
22 536 navigator.

23  
24  
25  
26 537 The implications of the findings from this scoping review are that it is difficult to  
27  
28 538 determine a specific intervention, or stand-alone approach to an intervention. It is also difficult to  
29  
30 539 assess the true effectiveness of many of the interventions, especially considering the differing  
31  
32 540 composite nature of the interventions, the fact that the evidence is mostly from observational  
33  
34 541 studies, and the range of outcome measures used to measure effectiveness. While many of the  
35  
36 542 interventions could be adapted to suit different health systems and jurisdictions, emphasis should  
37  
38 543 be on the context and the strengths and limitations of the individual health system, and a clear  
39  
40 544 evidence-based performance metric for appropriate evaluation of effectiveness of an intervention  
41  
42 545 ought to be determined a priority. Diagnosing cancer faster and more accurately at an earlier  
43  
44 546 stage is a key priority of the 2019-2029 Canadian Strategy for Cancer Control.<sup>114</sup> Over the next 5  
45  
46 547 years, the Canadian Partnership Against Cancer will leverage findings from this scoping review,  
47  
48  
49  
50  
51 548 as one of several inputs, and partner with Canadian jurisdictions to continue to test innovative  
52  
53  
54  
55  
56  
57  
58  
59  
60

1  
2  
3 549 models of care that expedite cancer diagnosis, especially for Indigenous and underserved  
4  
5 550 populations.  
6  
7

8 551

## 10 552 **Limitations and merits**

11  
12 553 There are some limitations to this study. The literature search was developed by a knowledge  
13  
14 554 synthesis librarian and peer reviewed by an independent knowledge synthesis librarian using the  
15  
16 555 PRESS checklist. We searched appropriate databases and websites for literature, and adhered to  
17  
18 556 known guidelines and standards in the conduct and reporting of the review. Even so, the  
19  
20 557 literature search was limited to evidence from the last 4 years and only evidence from English-  
21  
22 558 language publications and organizational websites. As such, potentially eligible articles could  
23  
24 559 have been missed.  
25  
26

27  
28 560 The eligibility criteria for inclusion were not limited to only comparative studies. This  
29  
30 561 meant that the focus of some of the included studies was not specifically on the assessment of  
31  
32 562 effectiveness of an intervention, which was based solely on the reported outcome in the articles.  
33  
34 563 As such, an intervention that appeared effective in a study may be ineffective in another study  
35  
36 564 depending on the assessed outcome with no clear reason for this discrepancy. Furthermore, this  
37  
38 565 review did not assess effectiveness of interventions across cancer patient types and  
39  
40 566 jurisdictions/regions. This would have allowed assessment of any differences in intervention  
41  
42 567 effectiveness by patient type and study jurisdiction. Lastly, and in line with the JBI's guidance  
43  
44 568 for the conduct of scoping reviews, we did not attempt to evaluate the quality of the included  
45  
46 569 studies or provide an assessment of the quality of the evidence.  
47  
48  
49  
50

51 570

## 54 571 **Conclusions**

1  
2  
3 572 The evidence suggests that interventions focused on improving accurate and timely cancer  
4  
5 573 diagnosis among symptomatic individuals are active topics of research, particularly in lung  
6  
7 574 cancer patient populations, and that the UK is championing this area of research. While the  
8  
9  
10 575 themes of the studied interventions are similar, the interventions differ in many ways within the  
11  
12 576 same intervention group. Multidisciplinary cooperation and involvement of a nurse navigator  
13  
14 577 appeared to be unique features of many of the effective interventions. Canadian and other  
15  
16 578 jurisdictions can leverage these lessons learned to develop and implement strategies adapted to  
17  
18 579 local health system needs to improve the cancer pre-diagnosis phase. Future research should  
19  
20 580 examine the effectiveness of the interventions identified through this review.  
21  
22  
23  
24 581

25  
26 582 **Data availability statement:** No additional data are available.  
27  
28 583

29  
30 584 **Ethics approval:** Not applicable.  
31  
32 585

33  
34 586 **Details of the role of the study sponsors:** The Canadian Partnership Against Cancer (the study  
35  
36 587 commissioner) contributed to specifying the study objectives and questions, and in summarizing  
37  
38 588 the evidence.  
39  
40 589

41  
42 590 **Patient and public involvement:** There was no active engagement of patients and/or members  
43  
44 591 of the public.  
45  
46  
47  
48  
49  
50  
51  
52  
53  
54  
55  
56  
57  
58  
59  
60

592 **References**

- 593 1. GBD Mortality and Causes of Death Collaborators. Global, regional, and national life  
594 expectancy, all-cause mortality, and cause-specific mortality for 249 causes of death,  
595 1980-2015: a systematic analysis for the Global Burden of Disease Study 2015. *Lancet*.  
596 2016;388(10053):1459-1544.
- 597 2. Sung H, Ferlay J, Siegel RL, et al. Global cancer statistics 2020: GLOBOCAN estimates  
598 of incidence and mortality worldwide for 36 cancers in 185 countries. *CA Cancer J Clin*.  
599 2021.
- 600 3. The Canadian Cancer Society. Cancer statistics at a glance. The Canadian Cancer  
601 Society. <https://bit.ly/2OjjxOO>. Published 2021. Accessed March 04, 2021.
- 602 4. Smetana K, Lacina L, Szabo P, Dvorankova B, Broz P, Sedo A. Ageing as an Important  
603 Risk Factor for Cancer. *Anticancer Res*. 2016;36(10):5009-5017.
- 604 5. World Health Organization. Fact Sheets: Cancer. The World Health Organization.  
605 <https://bit.ly/3c0xaL4>. Published 2018. Accessed March 04, 2021.
- 606 6. Peters MDJ, Marnie C, Tricco AC, et al. Updated methodological guidance for the  
607 conduct of scoping reviews. *JBIM Evid Synth*. 2020;18(10):2119-2126.
- 608 7. Tricco AC, Lillie E, Zarin W, et al. PRISMA Extension for Scoping Reviews (PRISMA-  
609 ScR): Checklist and Explanation. *Ann Intern Med*. 2018;169(7):467-473.
- 610 8. McGowan J, Sampson M, Salzwedel DM, Cogo E, Foerster V, Lefebvre C. PRESS Peer  
611 Review of Electronic Search Strategies: 2015 Guideline Statement. *J Clin Epidemiol*.  
612 2016;75:40-46.
- 613 9. Canadian Partnership Against Cancer. *Leading Practices to Create a Seamless Patient  
614 Experience for the Pre-diagnosis Phase of Care: An Environmental Scan*. Toronto,  
615 Canada: Canadian Partnership Against Cancer;2018.
- 616 10. Agnarsdottir M, Paaren H, Vassilaki I. The impact of standardized care pathway on  
617 reporting time for invasive melanoma - results from one pathology department in  
618 Sweden. *Ups J Med Sci*. 2019;124:260-264.
- 619 11. Almuammar A. Primary health care factors associated with late presentation of cancer in  
620 Saudi Arabia. *Journal of Radiotherapy in Practice*. 2020;19:71-75.

- 1  
2  
3 621 12. Alonso-Abreu I, Alarcon-Fernandez O, Gimeno-Garcia AZ, et al. Early Colonoscopy  
4 622 Improves the Outcome of Patients With Symptomatic Colorectal Cancer. *Dis Colon*  
5 623 *Rectum*. 2017;60:837-844.
- 6  
7  
8 624 13. Antel K, Louw VJ, Maartens G, Oosthuizen J, Verburgh E. Diagnosing lymphoma in the  
9 625 shadow of an epidemic: lessons learned from the diagnostic challenges posed by the dual  
10 626 tuberculosis and HIV epidemics. *Leuk Lymphoma*. 2020:1-5.
- 11  
12  
13 627 14. Arhi CS, Burns EM, Bottle A, et al. Delays in referral from primary care worsen survival  
14 628 for patients with colorectal cancer: a retrospective cohort study. *Br J Gen Pract*.  
15 629 2020;70:e463-e471.
- 16  
17  
18 630 15. Brian T, Adams B, Jameson M. Cutaneous melanoma: an audit of management  
19 631 timeliness against New Zealand guidelines. *N Z Med J*. 2017;130:54-61.
- 20  
21  
22 632 16. Cazzaniga S, Castelli E, Di Landro A, et al. Mobile teledermatology for melanoma  
23 633 detection: Assessment of the validity in the framework of a population-based skin cancer  
24 634 awareness campaign in northern Italy. *J Am Acad Dermatol*. 2019;81:257-260.
- 25  
26  
27 635 17. Chapman C, Thomas C, Morling J, et al. Early clinical outcomes of a rapid colorectal  
28 636 cancer diagnosis pathway using faecal immunochemical testing in Nottingham.  
29 637 *Colorectal Dis*. 2020;22:679-688.
- 30  
31  
32 638 18. Chavarri-Guerra Y, Soto-Perez-de-Celis E, Ramos-Lopez W, et al. Patient Navigation to  
33 639 Enhance Access to Care for Underserved Patients with a Suspicion or Diagnosis of  
34 640 Cancer. *Oncologist*. 2019;24:1195-1200.
- 35  
36  
37 641 19. Chng M, Coulter IC, Surash S. Impact of the updated NICE referral pathway for patients  
38 642 with suspected brain cancer on a neuroscience service. *Br J Neurosurg*. 2020:1-5.
- 39  
40  
41 643 20. Christensen HM, Huniche L. Patient perspectives and experience on the diagnostic  
42 644 pathway of lung cancer: A qualitative study. *SAGE Open Med*.  
43 645 2020;8:2050312120918996.
- 44  
45  
46 646 21. Chung Y, van der Sande AAJ, de Roos KP, et al. Poor agreement between the automated  
47 647 risk assessment of a smartphone application for skin cancer detection and the rating by  
48 648 dermatologists. *J Eur Acad Dermatol Venereol*. 2020;34:274-278.
- 49  
50  
51 649 22. Cock K. Nurse-led service development for suspected bowel cancer. *Cancer Nursing*  
52 650 *Practice*. 2017;16:28-31.
- 53  
54  
55  
56  
57  
58  
59  
60

- 1  
2  
3 651 23. Common JL, Mariathas HH, Parsons K, et al. Reducing Wait Time for Lung Cancer  
4 652 Diagnosis and Treatment: Impact of a Multidisciplinary, Centralized Referral Program.  
5 653 *Can Assoc Radiol J.* 2018;69:322-327.  
6  
7  
8 654 24. Cotton C, Mahut C, Blyth J, et al. Using Lean to Improve Wait Time Performance in  
9 655 Diagnostic Assessment for Lung Cancer. *Healthc Q.* 2020;22:59-63.  
10  
11 656 25. Creak A. Prospective Cohort of Referrals to a Cancer of Unknown Primary Clinic,  
12 657 including Direct Access from Primary Care. *Clin Oncol (R Coll Radiol).* 2020;32:e87-  
13 658 e92.  
14  
15 659 26. Dahl TL, Vedsted P, Jensen H. The effect of standardised cancer pathways on Danish  
16 660 cancer patients' dissatisfaction with waiting time. *Dan Med J.* 2017;64.  
17  
18 661 27. Di Girolamo C, Walters S, Gildea C, Benitez Majano S, Rachet B, Morris M. Can we  
19 662 assess Cancer Waiting Time targets with cancer survival? A population-based study of  
20 663 individually linked data from the National Cancer Waiting Times monitoring dataset in  
21 664 England, 2009-2013. *PLoS ONE.* 2018;13:e0201288.  
22  
23 665 28. Drudge-Coates L, Khati V, Ballesteros R, et al. A nurse practitioner model for the  
24 666 assessment of suspected prostate cancer referrals is safe, cost and time efficient.  
25 667 *Ecancermedicalscience.* 2019;13:994.  
26  
27 668 29. Eastham R, Duffy S, Foster C, Beaumont A. DART: a new look at the 2-week wait  
28 669 suspected cancer referral process. *Br J Gen Pract.* 2017;67:560.  
29  
30 670 30. Emery JD, Gray V, Walter FM, et al. The Improving Rural Cancer Outcomes Trial: a  
31 671 cluster-randomised controlled trial of a complex intervention to reduce time to diagnosis  
32 672 in rural cancer patients in Western Australia. *Br J Cancer.* 2017;117:1459-1469.  
33  
34 673 31. Evans J, Ziebland S, MacArtney JI, Bankhead CR, Rose PW, Nicholson BD. GPs'  
35 674 understanding and practice of safety netting for potential cancer presentations: a  
36 675 qualitative study in primary care. *Br J Gen Pract.* 2018;68:e505-e511.  
37  
38 676 32. Evison M, Hewitt K, Lyons J, et al. Implementation and outcomes of the RAPID  
39 677 programme: Addressing the front end of the lung cancer pathway in Manchester. *Clin*  
40 678 *Med.* 2020;20:401-405.  
41  
42 679 33. Ezer N, Navasakulpong A, Schwartzman K, Ofiara L, Gonzalez AV. Impact of rapid  
43 680 investigation clinic on timeliness of lung cancer diagnosis and treatment. *BMC polm.*  
44 681 2017;17:178.  
45  
46  
47  
48  
49  
50  
51  
52  
53  
54  
55  
56  
57  
58  
59  
60



- 1  
2  
3 682 34. Fallon M, Adil MT, Ahmed K, Whitelaw D, Rashid F, Jambulingam P. Impact of 'two-  
4 683 week wait' referral pathway on the diagnosis, treatment and survival in upper and lower  
5 684 gastrointestinal cancers. *Postgrad Med J*. 2019;95:470-475.
- 6  
7  
8 685 35. Gardner D, Nixon IJ. An analysis of waiting times in patients with thyroid cancer. *Surg*.  
9 686 2020;06:06.
- 10  
11  
12 687 36. Hennessy M, Ryan D, Clarke S, et al. Optimal Timing of CT Scanning in the Rapid  
13 688 Access Lung Cancer Clinic. *Ir Med J*. 2020;113:121.
- 14  
15  
16 689 37. Hirst Y, Lim AWW. Acceptability of text messages for safety netting patients with low-  
17 690 risk cancer symptoms: a qualitative study. *Br J Gen Pract*. 2018;68:e333-e341.
- 18  
19 691 38. Hunt WTN, Ali L, Marder H, Sansom JE, de Berker DAR. A service evaluation between  
20 692 2-week wait (2WW) skin cancer referrals via teledermatology and the standard face-to-  
21 693 face pathway at a teaching hospital. *Clin Exp Dermatol*. 2020;45:473-476.
- 22  
23  
24 694 39. Iachina M, Jakobsen E, Fallesen AK, Green A. Transfer between hospitals as a predictor  
25 695 of delay in diagnosis and treatment of patients with Non-Small Cell Lung Cancer - a  
26 696 register based cohort-study. *BMC Health Serv Res*. 2017;17:267.
- 27  
28  
29 697 40. Jefferson L, Atkin K, Sheridan R, et al. Non-attendance at urgent referral appointments  
30 698 for suspected cancer: a qualitative study to gain understanding from patients and GPs. *Br*  
31 699 *J Gen Pract*. 2019;18:18.
- 32  
33  
34 700 41. Jensen H, Topping ML, Vedsted P. Prognostic consequences of implementing cancer  
35 701 patient pathways in Denmark: a comparative cohort study of symptomatic cancer patients  
36 702 in primary care. *BMC Cancer*. 2017;17:627.
- 37  
38  
39 703 42. Jeyakumar HS, Wright A. Improving regional lung cancer optimal care pathway  
40 704 compliance through a rapid-access respiratory clinic. *Intern Med J*. 2020;50:805-810.
- 41  
42  
43 705 43. Jiang T, Ren S, Li X, Su C, Zhou C, O'Brien M. The changing diagnostic pathway for  
44 706 lung cancer patients in Shanghai, China. *Eur J Cancer*. 2017;84:168-172.
- 45  
46  
47 707 44. Jiang L, Gilbert J, Langley H, Moineddin R, Groome PA. Is being diagnosed at a  
48 708 dedicated breast assessment unit associated with a reduction in the time to diagnosis for  
49 709 symptomatic breast cancer patients? *Eur J Cancer Care (Engl)*. 2018;27:e12864.
- 50  
51  
52 710 45. Jones JA, Catton J, Howard G, et al. Impact of straight to test pathways on time to  
53 711 diagnosis in oesophageal and gastric cancer. *BMJ open qual*. 2018;7:e000328.
- 54  
55  
56  
57  
58  
59  
60



- 1  
2  
3 712 46. Joyce K, Zermanos T, Badrinath P. Factors associated with variation in emergency  
4 713 diagnoses of cancer at general practice level in England. *J Public Health (Oxf)*.  
5 714 2020;05:05.  
6  
7  
8 715 47. Kassirian S, Dzioba A, Hamel S, et al. Delay in diagnosis of patients with head-and-neck  
9 716 cancer in Canada: impact of patient and provider delay. *Current Oncology*.  
10 717 2020;27:e467-e477.  
11  
12  
13 718 48. Kidney E, Greenfield S, Berkman L, et al. Cancer suspicion in general practice, urgent  
14 719 referral, and time to diagnosis: a population-based GP survey nested within a feasibility  
15 720 study using information technology to flag-up patients with symptoms of colorectal  
16 721 cancer. *BJGP open*. 2017;1:bjgpopen17X101109.  
17  
18  
19 722 49. Laerum D, Brustugun OT, Gallefoss F, Falk R, Strand T-E, Fjellbirkeland L. Reduced  
20 723 delays in diagnostic pathways for non-small cell lung cancer after local and National  
21 724 initiatives. *Cancer Treat Res Commun*. 2020;23:100168.  
22  
23  
24 725 50. Largey G, Briggs P, Davies H, et al. The Victorian Lung Cancer Service Redesign  
25 726 Project: Impacts of a Quality Improvement collaborative on timeliness and management  
26 727 in lung cancer. *Intern Med J*. 2020;08:08.  
27  
28  
29 728 51. Lau K, Wilkinson J, Moorthy R. A web-based prediction score for head and neck cancer  
30 729 referrals. *Clin Otolaryngol*. 2018;15:15.  
31  
32  
33 730 52. Laudicella M, Walsh B, Burns E, Li Donni P, Smith PC. What is the impact of rerouting  
34 731 a cancer diagnosis from emergency presentation to GP referral on resource use and  
35 732 survival? Evidence from a population-based study. *BMC Cancer*. 2018;18:394.  
36  
37  
38 733 53. McCutchan G, Smits S, Ironmonger L, et al. Evaluation of a national lung cancer  
39 734 symptom awareness campaign in Wales. *Br J Cancer*. 2020;122:491-497.  
40  
41  
42 735 54. McKevitt EC, Dingee CK, Leung S-P, et al. Reduced Time to Breast Cancer Diagnosis  
43 736 with Coordination of Radiological and Clinical Care. *Cureus*. 2017;9:e1919.  
44  
45  
46 737 55. McKevitt E, Dingee C, Warburton R, et al. Patient navigation reduces time to care for  
47 738 patients with breast symptoms and abnormal screening mammograms. *Am J Surg*.  
48 739 2018;215:805-811.  
49  
50  
51 740 56. Moodley J, Cairncross L, Naiker T, Constant D. From symptom discovery to treatment -  
52 741 women's pathways to breast cancer care: a cross-sectional study. *BMC Cancer*.  
53 742 2018;18:312.  
54  
55  
56  
57  
58  
59  
60

- 1  
2  
3 743 57. Moor JW, Paleri V, Edwards J. Patient classification of two-week wait referrals for  
4 744 suspected head and neck cancer: a machine learning approach. *J Laryngol Otol.* 2019;1-  
5 745 4.  
6  
7  
8 746 58. Moreno-Ramirez D, Raya-Maldonado J, Morales-Conde M, et al. Increasing Frequency  
9 747 of Seborrheic Keratosis Diagnoses as a Favorable Consequence of Teledermatology-  
10 748 Based Skin Cancer Screening: A Cross-sectional Study of 34,553 Patients. *Am J Clin*  
11 749 *Dermatol.* 2017;18:681-685.  
12  
13  
14  
15 750 59. Mullin MLL, Tran A, Golemic B, et al. Improving Timeliness of Lung Cancer  
16 751 Diagnosis and Staging Investigations Through Implementation of Standardized Triage  
17 752 Pathways. *JCO Oncol Pract.* 2020;16:e1202-e1208.  
18  
19  
20 753 60. Murchie P, Adam R, McNair E, et al. Cancer diagnosis in Scottish primary care: Results  
21 754 from the National Cancer Diagnosis Audit. *Eur J Cancer Care (Engl).* 2020;29:e13234.  
22  
23  
24 755 61. Neal RD, Barham A, Bongard E, et al. Immediate chest X-ray for patients at risk of lung  
25 756 cancer presenting in primary care: randomised controlled feasibility trial. *Br J Cancer.*  
26 757 2017;116:293-302.  
27  
28  
29 758 62. Nicholson P, Macedo C, Fuller C, Thomas L. Patient satisfaction with a new skin cancer  
30 759 teledermatology service. *Clin Exp Dermatol.* 2020;45:691-698.  
31  
32  
33 760 63. Nilbert M, Blackberg M, Ceberg J, Hagberg O, Stenhoff R, Liedberg F. Diagnostic  
34 761 pathway efficacy for urinary tract cancer: population-based outcome of standardized  
35 762 evaluation for macroscopic haematuria. *Scand J Urol.* 2018;52:237-243.  
36  
37  
38 763 64. Nixon S, Bezverbnaya K, Maganti M, et al. Evaluation of Lymphadenopathy and  
39 764 Suspected Lymphoma in a Lymphoma Rapid Diagnosis Clinic. *JCO Oncol Pract.*  
40 765 2020;16:e29-e36.  
41  
42  
43 766 65. Orchard P, Arvind N, Wint A, et al. Removing hospital-based triage from suspected  
44 767 colorectal cancer pathways: the impact and learning from a primary care-led electronic  
45 768 straight-to-test pathway. *BMJ Qual Saf.* 2020;11:11.  
46  
47  
48 769 66. Pannebakker MM, Mills K, Johnson M, Emery JD, Walter FM. Understanding  
49 770 implementation and usefulness of electronic clinical decision support (eCDS) for  
50 771 melanoma in English primary care: a qualitative investigation. *BJGP open.*  
51 772 2019;3:bjgpopen18X101635.  
52  
53  
54  
55  
56  
57  
58  
59  
60

- 1  
2  
3 773 67. Pearson C, Poirier V, Fitzgerald K, Rubin G, Hamilton W. Cross-sectional study using  
4 774 primary care and cancer registration data to investigate patients with cancer presenting  
5 775 with non-specific symptoms. *BMJ Open*. 2020;10:e033008.  
6  
7  
8 776 68. Phillips WW, Hofferberth SC, Armitage J, et al. PD01.19 Lung Cancer Strategist  
9 777 Program: a Novel Care Delivery Model to Improve Timeliness of Diagnosis and  
10 778 Treatment. *Journal of Thoracic Oncology*. 2019;14:S1140-S1140.  
11  
12  
13 779 69. Piano M, Black G, Amelung D, Power E, Whitaker KL. Exploring public attitudes  
14 780 towards the new Faster Diagnosis Standard for cancer: a focus group study with the UK  
15 781 public. *Br J Gen Pract*. 2019;69:e413-e421.  
16  
17  
18 782 70. Price S, Spencer A, Zhang X, et al. Trends in time to cancer diagnosis around the period  
19 783 of changing national guidance on referral of symptomatic patients: A serial cross-  
20 784 sectional study using UK electronic healthcare records from 2006-17. *Cancer epidemiol*.  
21 785 2020;69:101805.  
22  
23  
24 786 71. Rankin NM, York S, Stone E, et al. Pathways to Lung Cancer Diagnosis: A Qualitative  
25 787 Study of Patients and General Practitioners about Diagnostic and Pretreatment Intervals.  
26 788 *Ann Am Thorac Soc*. 2017;14:742-753.  
27  
28  
29 789 72. Round T, Gildea C, Ashworth M, Moller H. Association between use of urgent suspected  
30 790 cancer referral and mortality and stage at diagnosis: a 5-year national cohort study. *Br J*  
31 791 *Gen Pract*. 2020;70:e389-e398.  
32  
33  
34 792 73. Sagar A, Mai DVC, Divya GS, et al. A colorectal straight-to-test cancer pathway with  
35 793 GP-guided triage improves attainment of the 28-day diagnosis target and increases  
36 794 outpatient clinic capacity. *Colorectal Dis*. 2020;19:19.  
37  
38  
39 795 74. Sandager M, Jensen H, Lipczak H, Sperling CD, Vedsted P. Cancer patients' experiences  
40 796 with urgent referrals to cancer patient pathways. *Eur J Cancer Care (Engl)*.  
41 797 2019;28:e12927.  
42  
43  
44 798 75. Sardi A, Orozco-Urdaneta M, Velez-Mejia C, et al. Overcoming Barriers in the  
45 799 Implementation of Programs for Breast and Cervical Cancers in Cali, Colombia: A Pilot  
46 800 Model. *J*. 2019;5:1-9.  
47  
48  
49 801 76. Scott SE, Oakley R, Moller H, Warburton F. Tracking cancer occurrence in the 5 years  
50 802 after referral for suspected head and neck cancer. *Oral Oncol*. 2020;109:104955.  
51  
52  
53  
54  
55  
56  
57  
58  
59  
60

- 1  
2  
3 803 77. Setyowibowo H, Hunfeld JAM, Iskandarsyah A, et al. A self-help intervention for  
4 804 reducing time to diagnosis in Indonesian women with breast cancer symptoms.  
5 805 *Psychooncology*. 2020;29:696-702.  
6  
7 806 78. Skevington SM, Long H, Gartland N. Does quality of life feedback promote seeking help  
8 807 for undiagnosed cancer? *Qual Life Res*. 2020;29:1609-1619.  
9  
10 808 79. Snoswell CL, Caffery LJ, Whitty JA, Soyer HP, Gordon LG. Cost-effectiveness of Skin  
11 809 Cancer Referral and Consultation Using Teledermoscopy in Australia. *JAMA Dermatol*.  
12 810 2018;154:694-700.  
13  
14 811 80. Stenman E, Palmer K, Ryden S, et al. Diagnostic spectrum and time intervals in Sweden's  
15 812 first diagnostic center for patients with nonspecific symptoms of cancer. *Acta Oncol*.  
16 813 2019;58:296-305.  
17  
18 814 81. Stevenson-Hornby V. A rapid-access diagnostic pathway in suspected pancreatic cancer.  
19 815 *Nursing Times*. 2018;114:13-11.  
20  
21 816 82. Sunderland M, Teague R, Gale K, Rademaker M, Oakley A, Martin RCW. E-referrals  
22 817 and teledermatology grading for melanoma: a successful model of care. *Australas J*  
23 818 *Dermatol*. 2020;61:147-151.  
24  
25 819 83. Tafuri A, Ashrafi AN, Palmer S, et al. One-Stop MRI and MRI/transrectal ultrasound  
26 820 fusion-guided biopsy: an expedited pathway for prostate cancer diagnosis. *World J Urol*.  
27 821 2020;38:949-956.  
28  
29 822 84. Talwar C, McClune A, Kelly D, Lowe D, Rogers SN. Two-week rule: suspected head  
30 823 and neck cancer referrals from a general medical practice perspective. *Br J Oral*  
31 824 *Maxillofac Surg*. 2020;58:981-985.  
32  
33 825 85. Thalanayar Muthukrishnan P, Ratnam M, Nguyen M-T, et al. Pre-diagnosis  
34 826 Multidisciplinary Tumor Board and Time to Staging in Lung Cancer: The Case Western  
35 827 MetroHealth Experience. *Cureus*. 2020;12:e6595.  
36  
37 828 86. Thanapal MR, Thin N, Alagaratnam S, et al. Straight-to-test colonoscopy: Has it  
38 829 improved the detection of colorectal cancer? A 7- year review. *Surg*. 2020;26:26.  
39  
40 830 87. Uthoff RD, Song B, Sunny S, et al. Point-of-care, smartphone-based, dual-modality,  
41 831 dual-view, oral cancer screening device with neural network classification for low-  
42 832 resource communities. *PLoS ONE*. 2018;13:e0207493.  
43  
44  
45  
46  
47  
48  
49  
50  
51  
52  
53  
54  
55  
56  
57  
58  
59  
60

- 1  
2  
3 833 88. Venchiarutti RL, Clark JR, Palme CE, et al. Influence of remoteness of residence on  
4 834 timeliness of diagnosis and treatment of oral cavity and oropharynx cancer: A  
5 835 retrospective cohort study. *J Med Imaging Radiat Oncol*. 2020;64:261-270.  
6  
7 836 89. Vestergaard T, Prasad SC, Schuster A, et al. Introducing teledermoscopy of possible skin  
8 837 cancers in general practice in Southern Denmark. *Fam Pract*. 2020;37:513-518.  
9  
10 838 90. Vijayakumar B, Shahidi M, Thakkar R, Prasad A. A novel 2-week wait lung cancer  
11 839 pathway starting with a telephone consultation, with patient satisfaction survey results.  
12 840 *Future Healthc J*. 2020;7:s15.  
13  
14 841 91. Walter FM, Pannebakker MM, Barclay ME, et al. Effect of a Skin Self-monitoring  
15 842 Smartphone Application on Time to Physician Consultation Among Patients With  
16 843 Possible Melanoma: A Phase 2 Randomized Clinical Trial. *JAMA netw*. 2020;3:e200001.  
17 844 92. Whitley EM, Raich PC, Dudley DJ, et al. Relation of comorbidities and patient  
18 845 navigation with the time to diagnostic resolution after abnormal cancer screening.  
19 846 *Cancer*. 2017;123:312-318.  
20  
21 847 93. Williams S, Davies P, Johnson B, Iles S. A fast track clinic improves diagnosis and  
22 848 treatment times for those investigated for lung cancer in Northland District Health Board.  
23 849 *N Z Med J*. 2018;131:29-37.  
24  
25 850 94. Williams VL, Narasimhamurthy M, Rodriguez O, et al. Dermatology-Driven Quality  
26 851 Improvement Interventions to Decrease Diagnostic Delays for Kaposi Sarcoma in  
27 852 Botswana. *J*. 2019;5:1-7.  
28  
29 853 95. Yeşiler Fİ, Çimen F, Atıkan Ş. Factors affecting delay in diagnosis and treatment of  
30 854 lung cancer. *Journal of Surgery & Medicine (JOSAM)*. 2020;4:720-724.  
31  
32 855 96. Zhu J, Chen R, Davidsson S, et al. Psychological and physiological impacts of a fast-  
33 856 track diagnostic workup for men with suspected prostate cancer: Preliminary report from  
34 857 a randomized clinical trial. *Cancer Commun (Lond)*. 2020;40:239-242.  
35  
36 858 97. Zienius K, Chak-Lam I, Park J, et al. Direct access CT for suspicion of brain tumour: an  
37 859 analysis of referral pathways in a population-based patient group. *BMC Fam Pract*.  
38 860 2019;20:118.  
39  
40 861 98. ACE Programme. Somerset Integrated Lung Cancer Pathway. Phases One and Two Final  
41 862 Report Final Report. In: Group SCC, ed. UK: NHS; 2017:1-12.  
42  
43  
44  
45  
46  
47  
48  
49  
50  
51  
52  
53  
54  
55  
56  
57  
58  
59  
60

- 1  
2  
3 863 99. Improving diagnostic pathways for patients with suspected colorectal cancer. In:  
4 864 Accelerate CEP, ed. UK: NHS England, Cancer Research UK and Macmillan Cancer  
5 865 Support; 2017:39.  
6  
7  
8 866 100. Improving diagnostic pathways for patients with vague symptoms. In: Accelerate CEP,  
9 867 ed. UK2017:49.  
10  
11 868 101. Pharmacy training for early diagnosis of cancer. In: Accelerate CEP, ed. UK: NHS  
12 869 England, Cancer Research UK and Macmillan Cancer Support; 2017:27.  
13  
14 870 102. Streamlining the lung diagnostic pathway (A87). In: Trust CCGwS, Sussex Healthcare  
15 871 NHS, eds. UK: NHS; 2017:14.  
16  
17 872 103. Streamlining the lung diagnostic pathway (A14). In: Trust H, Mid Sussex CCGwB,  
18 873 Sussex University H, eds. UK: NHS; 2017:27.  
19  
20 874 104. Multidisciplinary Diagnostic Centre (MDC) based pathways for patients with non-  
21 875 specific but concerning symptoms. Interim report. In: Accelerate CEP, ed. UK: NHS  
22 876 England, Cancer Research UK and Macmillan Cancer Support; 2018.  
23  
24 877 105. New Brunswick Cancer Network. Cancer System Performance 2019. In. New Brunswick,  
25 878 Canada: Government of New Brunswick; 2020:36.  
26  
27 879 106. Gill B. Improving diagnostic pathways for patients with suspected lung cancer. In:  
28 880 Accelerate CEP, ed. UK: NHS England, Cancer Research UK and Macmillan Cancer  
29 881 Support; 2017.  
30  
31 882 107. Hamilton M, Hodgson O, Dai D, McDonnell P. Waiting Times for Suspected and  
32 883 Diagnosed Cancer Patients. 2017-18 Annual Report. In: Nhs, ed. UK: NHS England;  
33 884 2018:21.  
34  
35 885 108. Robinson S, Fuller E. South Tees Optical Referral Project (STORP). A project summary.  
36 886 In: Accelerate CEP, ed. UK2017:14.  
37  
38 887 109. Robinson S, Fuller E. A Lung Health Service – Doncaster pharmacy direct referral for  
39 888 chest x-ray. A project summary. In: Accelerate CEP, ed. UK: NHS England, Cancer  
40 889 Research UK and Macmillan Cancer Support; 2017:12.  
41  
42 890 110. Robinson S, Poirier V, Watson S. Using Cancer Decision Support Tools to support the  
43 891 early diagnosis of cancer. In: Accelerate CEP, ed. UK: NHS; 2017:39.  
44  
45 892 111. Services AH. Cancer SCN Quarterly Update. July to September 2018. In. Canada:  
46 893 Alberta Health Services; 2018.  
47  
48  
49  
50  
51  
52  
53  
54  
55  
56  
57  
58  
59  
60

- 1  
2  
3 894 112. Stacey C, D S, M E, K S, A T. Implementing new models and standards for earlier and  
4  
5 895 faster diagnosis of cancer. Paper presented at: Health and Care Innovation Expo2018;  
6  
7 896 Manchester, UK.
- 8 897 113. Inzetta SL, Musarra LL. Breast Care ACCESS Project. *Oncology Issues*. 2018;33:34-45.  
9
- 10 898 114. Canadian Partnership Against Cancer. *Canadian Strategy for Cancer Control (2019 to*  
11  
12 899 *2029): Doing together what cannot be done alone* Toronto, Canada: Canadian  
13  
14 900 Partnership Against Cancer.

15  
16 901  
17  
18  
19  
20  
21  
22  
23  
24  
25  
26  
27  
28  
29  
30  
31  
32  
33  
34  
35  
36  
37  
38  
39  
40  
41  
42  
43  
44  
45  
46  
47  
48  
49  
50  
51  
52  
53  
54  
55  
56  
57  
58  
59  
60

For peer review only



**Table 1:** Summary of the characteristics of the included published articles that reported data on effective interventions

| Intervention                                         | Article                          | Study country (Region)               | Study type (Study years)                                            | Cancer type (Population) [Sample size]                | Assessment metric                                                                                        | Results                                                                                                                                                                                                                                                                              |
|------------------------------------------------------|----------------------------------|--------------------------------------|---------------------------------------------------------------------|-------------------------------------------------------|----------------------------------------------------------------------------------------------------------|--------------------------------------------------------------------------------------------------------------------------------------------------------------------------------------------------------------------------------------------------------------------------------------|
| <b>Centralized or coordinated diagnostic service</b> | Christensen 2020 <sup>20</sup>   | Denmark (Odense)                     | Cross-sectional (2016-2017)                                         | Lung (Adult) [20]                                     | Patients' perspective, experiences, and expectations                                                     | Although patients experienced anxiety with the fast-track diagnostic pathway, they still wanted to move through with diagnosis as quickly as possible (Effective)                                                                                                                    |
|                                                      | Common 2018 <sup>23</sup>        | Canada (Newfoundland)                | Case-Control (2015-2016)                                            | Lung (Adult) [133]                                    | Time from first abnormal image to biopsy                                                                 | There was a statistically significant decline in wait times for patients from 61.5 to 36.0 days ( $p < 0.0001$ ) (Effective)                                                                                                                                                         |
|                                                      | Evison 2020 <sup>32</sup>        | UK (Manchester)                      | Before-and-After (2016-2019)                                        | Lung (Adult) [1035]                                   | Mean time from referral to CT                                                                            | The median time from referral to CT was 3 days. Overall 56% and 90% of patients had completed a CT and consultation within 3 and 7 days of referral, respectively (0% and 24% prior to implementation) (Effective)                                                                   |
|                                                      | Ezer 2017 <sup>33</sup>          | Canada (Montreal)                    | Case-Control (2010-2011)                                            | Lung (Adult) [327 (195 RIC; 132 non-RIC)]             | Time from first contact with physician to diagnosis                                                      | Time from first contact to pathological diagnosis was shorter (median (M) 26 days; IQR 14–42 days) vs. control patients (M 40 days; IQR 16–68 days) (Effective)                                                                                                                      |
|                                                      | Jiang 2018 <sup>44</sup>         | Canada (Ontario)                     | Case-Control (2011)                                                 | Breast (Adult) [4381]                                 | Time to diagnosis                                                                                        | The Canadian timeliness targets (time from patients' first referral or test to the cancer diagnosis) were achieved more often than for usual care (71.7% vs. 58.1%, respectively), with associated 10-day (95% CI: 7.8–11.9) reduction in the median diagnostic interval (Effective) |
|                                                      | McKevitt 2017 <sup>54</sup>      | Canada (British Columbia)            | Case-Control (2009)                                                 | Breast (NR) [373]                                     | Diagnostic wait time                                                                                     | Patients had a decreased time to surgical consultation (33 vs 86 days, $p < 0.0001$ ) for both malignant (36 vs 59 days, $p = 0.0007$ ) and benign diagnoses (31 vs 95 days, $p < 0.0001$ ) (Effective)                                                                              |
|                                                      | McKevitt 2018 <sup>55</sup>      | Canada (Vancouver)                   | Case-Control (2012)                                                 | Breast (NR) [176 (40 RABC; 136 TS)]                   | Time from presentation to surgical consultation                                                          | Time from presentation to surgeon evaluation was shorter in the RABC group for patients with breast symptoms (81 vs 35 days, $p < .0001$ ) (Effective)                                                                                                                               |
|                                                      | Moodley 2018 <sup>56</sup>       | South Africa (Western Cape province) | Cross-sectional (2015-2016)                                         | Breast (Adult) [201]                                  | Time between first health care provider visit and date of diagnosis                                      | The median time between the first health care visit and a breast cancer diagnosis was 28 days (IQR 13–58 days). Women whose initial reaction was denial of the breast symptom had a significantly shorter diagnostic interval (11 days vs. 29 days, $p = 0.010$ ) (Effective)        |
| Williams 2018 <sup>93</sup>                          | New Zealand (Northland district) | Before-and-After (2015-2016)         | Lung (Adult) [212 (70 in phase 1, 46 in phase 2 and 71 in phase 3)] | Time from GP referral to first specialist appointment | Time from GP referral to first specialist appointment improved significantly ( $p = 0.005$ ) (Effective) |                                                                                                                                                                                                                                                                                      |
| <b>Interventions to enhance diagnostic services</b>  | Chapman 2020 <sup>17</sup>       | UK (Nottingham)                      | Cross-sectional (2017-2018)                                         | Gastrointestinal (Adult) [1934]                       | Colorectal cancer (CRC) detection rate                                                                   | The symptomatic pathway incorporating FIT was feasible and appeared more clinically effective than pathways based on age and symptoms alone, with FIT results identifying patients with a significantly higher risk                                                                  |



|                               |                                    |                               |                              |                              |                                                                        |                                                                                                                                                                                                                       |
|-------------------------------|------------------------------------|-------------------------------|------------------------------|------------------------------|------------------------------------------------------------------------|-----------------------------------------------------------------------------------------------------------------------------------------------------------------------------------------------------------------------|
|                               |                                    |                               |                              |                              | after a FIT                                                            | of CRC (Effective)                                                                                                                                                                                                    |
|                               | Cotton 2020 <sup>24</sup>          | Canada (Ontario)              | Before-and-After (2017-2018) | Lung (NR) [NR]               | Referral to diagnosis                                                  | Monthly patient volumes increased by 65%, and wait time improved by 60% (Effective)                                                                                                                                   |
|                               | Laudicella 2018 <sup>52</sup>      | UK (England)                  | Case-Control (2006-2009)     | Multiple (Adult) [372353]    | Survival of patients                                                   | Rerouting patients from emergency presentation to new referral resulted in better patient survival in all cancer cohorts (Effective)                                                                                  |
|                               | Nixon 2020 <sup>64</sup>           | Canada (Ontario)              | Case-Control (2015-2017)     | Haematological (Adult) [126] | Time from initial consultation to diagnosis of lymphoma                | Median time to lymphoma diagnosis was 16 days for patients assessed in the nurse practitioner-led lymphoma rapid diagnosis clinic and 28 days for historical controls (P<0.001) (Effective)                           |
|                               | Sardi 2019 <sup>75</sup>           | Colombia (Cali)               | Before-and-After (2012-2016) | Multiple (NR) [114]          | Time from initial consultation to biopsy                               | The average time from initial consult to biopsy decreased from 65 to 20 days and from biopsy to diagnosis from 33 to 4 days (Effective)                                                                               |
|                               | Setyowibowo 2020 <sup>77</sup>     | Indonesia (Bandung West Java) | RCT (2017)                   | Breast (Adult) [107]         | Time between first visit to the hospital and a definitive diagnosis    | The intervention reduced the time to definitive diagnosis: mean difference = -13.26, 95% CI = -24.51 to -2.00, P=0.02) (Effective)                                                                                    |
|                               | Skevington 2020 <sup>78</sup>      | UK (Manchester)               | RCT (2015-2016)              | Multiple (Adult) [107]       | Quality of life                                                        | Psychological quality of life increased (Effective)                                                                                                                                                                   |
|                               | Stenman 2019 <sup>80</sup>         | Sweden (Kristianstad)         | Cross-sectional (2015)       | Multiple (Adult) [290]       | Total diagnostic interval                                              | Shorter diagnostic interval (time from referral decision in primary care to diagnosis). The median primary care interval was 21 days, and the median diagnostic interval was 11 days (Effective)                      |
|                               | Tafari 2020 <sup>83</sup>          | USA (NR)                      | Case-Control (2016-2018)     | Prostate (Adult) [370]       | Time from multiparametric Magnetic Resonance Imaging (mpMRI) to biopsy | One-Stop patients experienced shorter time from mpMRI to biopsy (0 vs 7 days; p< 0.01) (Effective)                                                                                                                    |
|                               | Williams 2019 <sup>94</sup>        | Botswana (Gaborone)           | Before-and-After (2015-2017) | Skin (Adult) [218]           | Diagnostic histology turnaround times                                  | Median turnaround in the post dermatology quality improvement interval was 11 days (IQR, 12-23 days) compared with 32 days in the pre-dermatology quality improvement interval (IQR, 24-56 days; P<0.001) (Effective) |
| <b>Multidisciplinary team</b> | Phillips 2019 <sup>68</sup>        | USA (NR)                      | Case-Control (2014-2016)     | Lung (NR) [218]              | Time to diagnosis                                                      | Compared to controls, patients with lung cancer in the Lung Cancer Strategist Program cohort had an expedited time from suspicious finding to diagnosis (34 vs 44 days, p=0.027) (Effective)                          |
| <b>Patient navigation</b>     | Chavarri-Guerra 2019 <sup>18</sup> | Mexico (Mexico City)          | Before-and-After (2016-2017) | Multiple (Adult) [70]        | Feasibility                                                            | 91% of patients successfully obtained appointments at cancer centers in <3 months (Effective)                                                                                                                         |
|                               | Drudge-Coates 2019 <sup>28</sup>   | UK (London)                   | Before-and-After (2012-2015) | Prostate (Adult) [60]        | Waiting times from the GP                                              | Compared with the previous physician-led service, waiting times for patient appointment fell by 52% over a 3-year study period (Effective)                                                                            |

|                               |                             |                                              |                              |                                                                                      |                                                                           |                                                                                                                                                                                                                                                                 |
|-------------------------------|-----------------------------|----------------------------------------------|------------------------------|--------------------------------------------------------------------------------------|---------------------------------------------------------------------------|-----------------------------------------------------------------------------------------------------------------------------------------------------------------------------------------------------------------------------------------------------------------|
|                               |                             |                                              |                              |                                                                                      | referral to initial clinic assessment                                     |                                                                                                                                                                                                                                                                 |
|                               | Whitley 2017 <sup>92</sup>  | USA (Boston, Denver, San Antonio, and Tampa) | Case-Control (2007-2011)     | Multiple (Adult) [6349]                                                              | Delays in diagnostic resolution based on Charlson Comorbidity Index score | Patient navigation reduced delays in diagnostic resolution, with the greatest benefits seen for those with a Charlson Comorbidity Index score $\geq 2$ (Effective)                                                                                              |
|                               | Antel 2020 <sup>13</sup>    | South Africa (Cape Town)                     | Before-and-After (2017-2019) | Haematological (Adult) [130]                                                         | Diagnostic interval                                                       | Compared with a historical cohort, the diagnostic interval (time from first health visit to diagnostic biopsy) for patients with lymphoma was significantly shorter, 13.5 vs 48 days ( $p=0.002$ ) (Effective)                                                  |
|                               | Arhi 2020 <sup>14</sup>     | UK (National)                                | Case-Control (2000-2013)     | Gastrointestinal (Adult) [7130]                                                      | Hazard ratios of death                                                    | Patients referred between 2 weeks to 3 months, and after 3 months with red-flag symptoms demonstrated a significantly worse prognosis than patients who were referred within 2 weeks (Effective)                                                                |
|                               | Chng 2020 <sup>19</sup>     | UK (Newcastle-upon-Tyne)                     | Case-Control (2015-2019)     | Brain (Adult) [101]                                                                  | Tumour detection rate                                                     | With guideline adherence, the brain tumour detection rate was 3-fold higher (36.0% vs 11.5%, $p=0.02$ ) (Effective)                                                                                                                                             |
|                               | Creak 2020 <sup>25</sup>    | UK (Brighton; Sussex)                        | Cross-sectional (2015-2018)  | Multiple (Adult) [258]                                                               | Time to diagnosis                                                         | Direct GP referrals were feasible and manageable within a tertiary clinic and resulted in high rates of cancer diagnoses and early contact with an oncologist and nurse specialist, cutting short the 'limbo' time of high anxiety before diagnosis (Effective) |
|                               | Hennessy 2020 <sup>36</sup> | Ireland (Dublin)                             | Case-Control (2012-2018)     | Lung (NR) [864]                                                                      | Time to diagnosis                                                         | Time to diagnosis was longer in those who had attended a post Rapid Access Lung Cancer Clinic CT (34.5 versus 21 days) (Effective)                                                                                                                              |
| <b>Rapid referral pathway</b> | Jones 2018 <sup>45</sup>    | UK (East Midlands)                           | Case-Control (2013-2015)     | Gastrointestinal (NR) [1401 (340 STTP, 495 traditional pathway, 566 control trusts)] | Time from referral to diagnosis                                           | The pathway saved a mean of 7 days from referral to treatment (with a 95% CI of 3 to 11 days, $p<0.008$ ) and a mean of 16 days from referral to diagnosis, when compared with a traditional pathway (Effective)                                                |
|                               | Joyce 2020 <sup>46</sup>    | UK (National)                                | Cross-sectional (2017-2018)  | Multiple (Mixed age) [NR]                                                            | Proportion with emergency diagnosis of cancer                             | A lower proportion of emergency diagnosis of cancer was found with higher 2 weeks wait referral conversion rate (Effective)                                                                                                                                     |
|                               | Pearson 2020 <sup>67</sup>  | UK (National)                                | Case-Control (2014)          | Multiple (Mixed age) [12873]                                                         | Primary care interval                                                     | Compared with patients with a specific alarm symptom, patients with non-specific but concerning symptoms had higher odds of having longer primary care intervals (adjusted OR: 1.24 (1.11 to 1.36)) (Effective)                                                 |
|                               | Round 2020 <sup>72</sup>    | UK (National)                                | Case-Control (2011-2017)     | Multiple (Mixed age) [1469103]                                                       | Risk of death                                                             | Cancer patients from the highest referring practices had a lower hazard of death (hazard ratio [HR] = 0.96; 95% confidence interval [CI] = 0.95 to 0.97) (Effective)                                                                                            |
|                               | Sandager 2019 <sup>74</sup> | Denmark (National)                           | Cross-sectional (2010)       | Multiple (Adult) [2256]                                                              | Patient experience                                                        | Overall, pathway referred patients were 21% more likely than non-pathway referred patients to report a positive experience (PR = 1.21 [95% CI: 1.11–1.30]) (Effective)                                                                                          |

|                                           |                                     |                             |                              |                                     |                                                                                   |                                                                                                                                                                                                                                                                                              |
|-------------------------------------------|-------------------------------------|-----------------------------|------------------------------|-------------------------------------|-----------------------------------------------------------------------------------|----------------------------------------------------------------------------------------------------------------------------------------------------------------------------------------------------------------------------------------------------------------------------------------------|
|                                           | Thanapal 2020 <sup>86</sup>         | UK (London)                 | Before-and-After (2012-2018) | Gastrointestinal (Adult) [1648]     | Time to diagnosis                                                                 | Patients on the pathway took 25 days to obtain results as compared to 40 days in the standard pathway (Effective)                                                                                                                                                                            |
|                                           | Vijayakumar 2020 <sup>90</sup>      | UK (Buckinghamshire)        | Cross-sectional (2018)       | Lung (NR) [111]                     | Patient satisfaction                                                              | High satisfaction with the service, with scores above 93% in all parameters (Effective)                                                                                                                                                                                                      |
| <b>Standardized care pathway</b>          | Alonso-Abreu 2017 <sup>12</sup>     | Spain (Tenerife)            | Case-Control (2008-2010)     | Gastrointestinal (Adult) [257]      | Survival rates                                                                    | Survival rates at 12 and 60 months after treatment were significantly higher in the early colonoscopy group compared with the standard schedule colonoscopy group ( $p < 0.001$ ) (Effective)                                                                                                |
|                                           | Dahl 2017 <sup>26</sup>             | Denmark (Countrywide)       | Before-and-After (2004-2010) | Multiple (Adult) [3292]             | Patient satisfaction for waiting time from referral to consultation at a hospital | Implementation of pathway was associated with a reduced level of patient-reported dissatisfaction with long waiting time from the time of referral to the first consultation at the hospital (Effective)                                                                                     |
|                                           | Laerum 2020 <sup>49</sup>           | Norway (Kristiansand)       | Before-and-After (2007-2016) | Lung (Adult) [780]                  | Referral interval                                                                 | The median referral interval among all patients was reduced by two days from baseline to the next time period when the local diagnostic algorithm was streamlined (Effective)                                                                                                                |
|                                           | Mullin 2020 <sup>59</sup>           | Canada (Ontario)            | Before-and-After (2018-2019) | Lung (NR) [833]                     | Time from referral to diagnosis                                                   | Time from referral to positron emission tomography decreased (from 38.5 to 15.7 days), time from referral to brain imaging decreased (from 33.4 to 13.1 days), and time from referral to diagnosis decreased (from 38.0 to 22.7 days), all demonstrating special-cause variation (Effective) |
|                                           | Nilbert 2018 <sup>63</sup>          | Sweden (Skane County)       | Case-Control (2015-2016)     | Urinary tract (Adult) [1871]        | Time from sign/symptom to diagnosis                                               | The standardized care pathway shortened the diagnostic delay to a median of 25 days compared to 35 days for regular referral ( $p=0.01$ ) (Effective)                                                                                                                                        |
|                                           | Rankin 2017 <sup>71</sup>           | Australia (New South Wales) | Cross-sectional (2014)       | Lung (Adult) [19]                   | Patient concerns urgency, advocacy, and referral                                  | Patients and general practitioners expressed similar themes across the diagnostic and pretreatment intervals (Effective)                                                                                                                                                                     |
| <b>Target or benchmark for wait times</b> | Jeyakumar 2020 <sup>42</sup>        | Australia (Victoria)        | Case-Control (2018)          | Lung (Adult) [46]                   | Mean time from initial CT to tissue diagnosis                                     | The Standard Care group met the target for treatment commencement in 33.3% of cases whereas the Rapid Access Clinic group achieved this in 77% (Effective)                                                                                                                                   |
|                                           | Jiang 2017 <sup>43</sup>            | China (Shanghai)            | Case-Control (2011-2015)     | Lung (NR) [4000]                    | Time from initial respiratory consultation to treatment decision                  | Takes a median 4 workdays (range 3 to 6) for a new patient from initial respiratory consultation to treatment decision, whereas in many countries, 14 workdays are considered a reasonable timeline (Effective)                                                                              |
|                                           | Sagar 2020 <sup>73</sup>            | UK (Milton, Somerset)       | Before-and-After (2019-2020) | Gastrointestinal (Mixed age) [1255] | 28-day target attainment                                                          | Attainment of the 28-day diagnosis target for all suspected colorectal cancer referrals improved following the establishment of a new pathway (88% vs. 82%, $P < 0.0001$ ) (Effective)                                                                                                       |
|                                           | Stevenson-Hornby 2018 <sup>81</sup> | UK (Wigan)                  | Before-and-After (2017)      | Gastrointestinal (NR) [NR]          | Percentage diagnosed                                                              | 55% of all referrals were found to have hepatobiliary-pancreatic cancer after pathway trial compared with 19% before (Effective)                                                                                                                                                             |
|                                           | Zhu 2020 <sup>96</sup>              | Sweden (Orebro)             | RCT (2015-2018)              | Prostate (Adult) [204]              | Self-reported symptoms of                                                         | Significant changes in depression symptoms and self-rated sleep quality suggested a benefit of the fast-track                                                                                                                                                                                |

|                                                |                                   |                                      |                                   |                                                                                                  |                                                                                                                                                                                                                                |                                                                                                                                                                                                                                                                                                                               |
|------------------------------------------------|-----------------------------------|--------------------------------------|-----------------------------------|--------------------------------------------------------------------------------------------------|--------------------------------------------------------------------------------------------------------------------------------------------------------------------------------------------------------------------------------|-------------------------------------------------------------------------------------------------------------------------------------------------------------------------------------------------------------------------------------------------------------------------------------------------------------------------------|
|                                                |                                   |                                      |                                   |                                                                                                  | stress                                                                                                                                                                                                                         | workup intervention (Effective)                                                                                                                                                                                                                                                                                               |
|                                                | *Piano 2019 <sup>69</sup>         | UK<br>(Guildford, Bradford)          | Cross-sectional (NR)              | Multiple (Adult) [29]                                                                            | Patient attitudes within the context of their recent referral experiences                                                                                                                                                      | Most patients had experienced swift referral. It was difficult for patients to understand how the new standard could affect upon the time that it takes to progress through the system. Responsibility for meeting the standard was also a concern as patients did not see their own behaviours as a form of Involvement (NA) |
| <b>Technology to support diagnosis process</b> | Cazzaniga 2019 <sup>16</sup>      | Italy (Bergamo)                      | Case-Control (2017)               | Skin (Adult) [232]                                                                               | Diagnostic accuracy                                                                                                                                                                                                            | The diagnostic accuracy of the online assessment compared with direct clinical examination was significant (Effective)                                                                                                                                                                                                        |
|                                                | Cock 2017 <sup>22</sup>           | UK (NR)                              | Guideline development (2014-2016) | Gastrointestinal (Adult) [NR]                                                                    | Patient satisfaction                                                                                                                                                                                                           | Audits were being conducted to assess and compare patient satisfaction with face-to-face versus telephone assessments, although intervention was well-received (Effective)                                                                                                                                                    |
|                                                | Eastham 2017 <sup>29</sup>        | UK (Leeds)                           | Before-and-After (2015-2016)      | Multiple (Adult) [NR]                                                                            | Form completion rates and time spent processing forms                                                                                                                                                                          | Form completion rates improved from a mean of 44% of forms at baseline (n = 210) to 99% post-intervention n = 236). Time spent processing forms also decreased from a mean of 96 seconds to 35 seconds post-introduction of the new system (Effective)                                                                        |
|                                                | Hirst 2018 <sup>37</sup>          | UK (London)                          | Cross-sectional (2016)            | Multiple (Adult) [NR]                                                                            | GP perspectives on txt-netting                                                                                                                                                                                                 | Text messages were perceived to be an acceptable potential strategy for safety netting patients with low-risk cancer symptoms (Effective)                                                                                                                                                                                     |
|                                                | Hunt 2020 <sup>38</sup>           | UK (England)                         | Case-Control (2018)               | Skin (Adult) [150 (75 consecutive TD referrals paired with 75 standard "Face to Face" controls)] | Time from referral to first appointment and diagnostic rates                                                                                                                                                                   | There was a 23% absolute and 37% relative increase in diagnostic completion rates in the mobile van compared with the central hospital facility (p=0.0001) (Effective)                                                                                                                                                        |
|                                                | Moor 2019 <sup>57</sup>           | UK (Newcastle-upon-Tyne; Birmingham) | Case-Control (2007-2010)          | Head and Neck (Mixed age) [4715]                                                                 | Diagnostic accuracy                                                                                                                                                                                                            | Machine learning algorithms accurately and effectively classify patients referred with suspected head and neck cancer symptoms (Effective)                                                                                                                                                                                    |
|                                                | Moreno-Ramirez 2017 <sup>58</sup> | Spain (Southern region)              | Case-Control (2004-2015)          | Skin (NR) [2009]                                                                                 | Waiting times for referral                                                                                                                                                                                                     | Waiting times for referral for teledermatology network versus conventional letter referral system 12.31 (8.22–16.40) vs 88.62 (38.42–138.82) (Effective)                                                                                                                                                                      |
|                                                | Nicholson 2020 <sup>62</sup>      | UK (London)                          | Cross-sectional (2018-2019)       | Skin (NR) [60]                                                                                   | Patient satisfaction                                                                                                                                                                                                           | Over 80% (49) would recommend the service, and the majority felt confident with the teledermatology model. Overall, patients would be happy to complete electronic questionnaires and receive results electronically, with younger patients being more amenable to this (Effective)                                           |
|                                                | Orchard 2020 <sup>65</sup>        | UK (Bristol)                         | Before-and-After (2014-2017)      | Gastrointestinal (Mixed age) [11357]                                                             | Time from referral to diagnosis                                                                                                                                                                                                | Time from referral to diagnosis reduced from 39 to 21 days and led to a dramatic improvement in patients starting treatment within 62 days (Effective)                                                                                                                                                                        |
| Snowswell 2018 <sup>79</sup>                   | New Zealand (Countrywide)         | Not clear (2012)                     | Skin (Adult) [300]                | Time to clinical resolution                                                                      | Mean time to clinical resolution was 9 days (range, 1-50 days) with teledermoscopy referral compared with 35 days (range, 0-138 days) with usual care alone (difference, 26 days; 95%credible interval 13-38 days) (Effective) |                                                                                                                                                                                                                                                                                                                               |

|    |                                   |                                  |                        |                       |                                                                              |                                                                                                                                                                                                   |
|----|-----------------------------------|----------------------------------|------------------------|-----------------------|------------------------------------------------------------------------------|---------------------------------------------------------------------------------------------------------------------------------------------------------------------------------------------------|
| 1  |                                   |                                  |                        |                       |                                                                              |                                                                                                                                                                                                   |
| 2  |                                   |                                  |                        |                       |                                                                              |                                                                                                                                                                                                   |
| 3  |                                   |                                  |                        |                       |                                                                              |                                                                                                                                                                                                   |
| 4  | Sunderland<br>2020 <sup>82</sup>  | New Zealand<br>(Auckland)        | Case-Control<br>(2016) | Skin<br>(NR) [809]    | Efficacy of<br>diagnostic tool                                               | A positive predictive value (PPV) of 38.1% and number needed to excise<br>(NNE) of 2.6, with less than 10% of referrals triaged for<br>teledermatology confirmed as melanoma (24/264) (Effective) |
| 5  |                                   |                                  |                        |                       |                                                                              |                                                                                                                                                                                                   |
| 6  | Uthoff 2018 <sup>87</sup>         | India<br>(Bangalore,<br>Dimapur) | Case-Control<br>(NR)   | Oral<br>(Adult) [99]  | Diagnostic<br>accuracy                                                       | Sensitivities, specificities, positive predictive values, and negative<br>predictive values ranged from 81.25% to 94.94% (Effective)                                                              |
| 7  |                                   |                                  |                        |                       |                                                                              |                                                                                                                                                                                                   |
| 8  | Vestergaard<br>2020 <sup>89</sup> | Denmark<br>(Southern<br>Denmark) | Case-Control<br>(2018) | Skin<br>(Adult) [519] | Percentage of<br>lesions not<br>requiring further<br>in-person<br>assessment | On evaluation by teledermatology, 31.5% of lesions did not need further<br>in-person assessment (Effective)                                                                                       |
| 9  |                                   |                                  |                        |                       |                                                                              |                                                                                                                                                                                                   |
| 10 |                                   |                                  |                        |                       |                                                                              |                                                                                                                                                                                                   |
| 11 |                                   |                                  |                        |                       |                                                                              |                                                                                                                                                                                                   |
| 12 |                                   |                                  |                        |                       |                                                                              |                                                                                                                                                                                                   |

13 CRC = colorectal cancer; CT = computed tomography; FIT = faecal immunochemical testing; GP = general practitioner; NR = not reported; RABC = rapid  
 14 access breast clinic; RCT = randomized controlled trial; RIC = rapid investigation clinic; STTP = straight to test pathway; TD = teledermatology; TS =  
 15 traditional system; UK = United Kingdom; USA = United States of America; \* = effective but not applicable; IQR = interquartile range  
 16  
 17  
 18  
 19  
 20  
 21  
 22  
 23  
 24  
 25  
 26  
 27  
 28  
 29  
 30  
 31  
 32  
 33  
 34  
 35  
 36  
 37  
 38  
 39  
 40  
 41  
 42  
 43  
 44  
 45  
 46  
 47

1  
2  
3 **Figures**  
4  
5

6  
7 **Figure 1:** Modified PRISMA flow chart  
8  
9

10 **Figure 2:** Geographical mapping of the included published articles  
11  
12

13  
14 **Figure 3:** Summary of cancer types reported by the included published articles  
15  
16

17  
18 **Figure 4:** Summary of intervention types reported by the included published articles  
19  
20  
21  
22  
23  
24  
25  
26  
27  
28  
29  
30  
31  
32  
33  
34  
35  
36  
37  
38  
39  
40  
41  
42  
43  
44  
45  
46  
47  
48  
49  
50  
51  
52  
53  
54  
55  
56  
57  
58  
59  
60

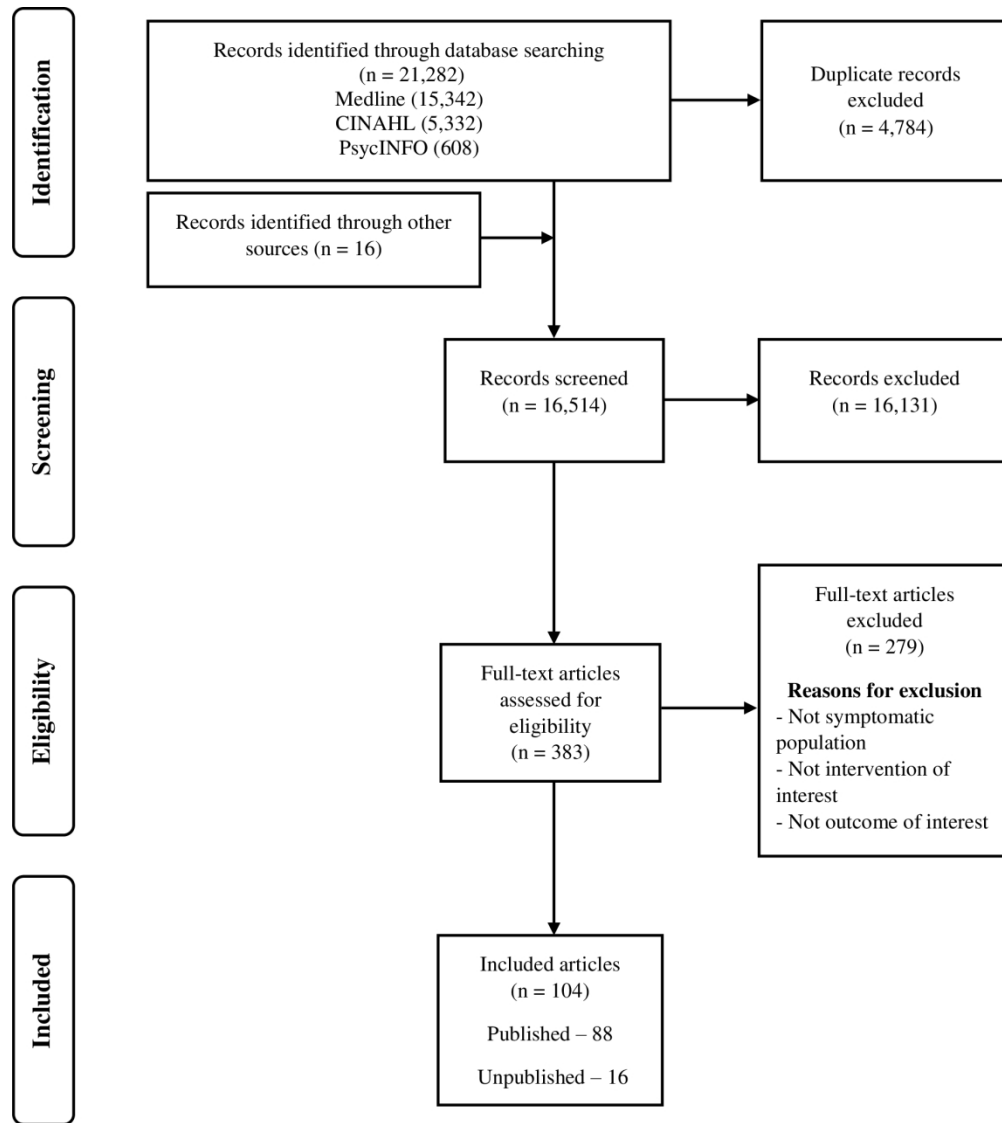

Figure 1: Modified PRISMA flow chart

166x186mm (300 x 300 DPI)

1  
2  
3  
4  
5  
6  
7  
8  
9  
10  
11  
12  
13  
14  
15  
16  
17  
18  
19  
20  
21  
22  
23  
24  
25  
26  
27  
28  
29  
30  
31  
32  
33  
34  
35  
36  
37  
38  
39  
40  
41  
42  
43  
44  
45  
46  
47  
48  
49  
50  
51  
52  
53  
54  
55  
56  
57  
58  
59  
60

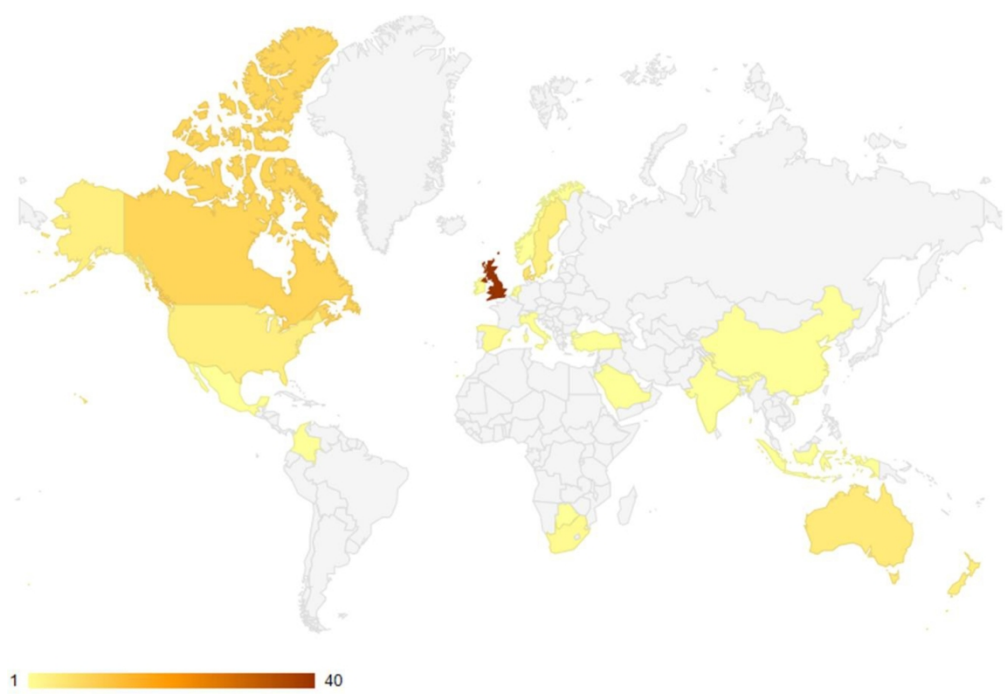

159x108mm (300 x 300 DPI)



1  
2  
3  
4  
5  
6  
7  
8  
9  
10  
11  
12  
13  
14  
15  
16  
17  
18  
19  
20  
21  
22  
23  
24  
25  
26  
27  
28  
29  
30  
31  
32  
33  
34  
35  
36  
37  
38  
39  
40  
41  
42  
43  
44  
45  
46  
47  
48  
49  
50  
51  
52  
53  
54  
55  
56  
57  
58  
59  
60

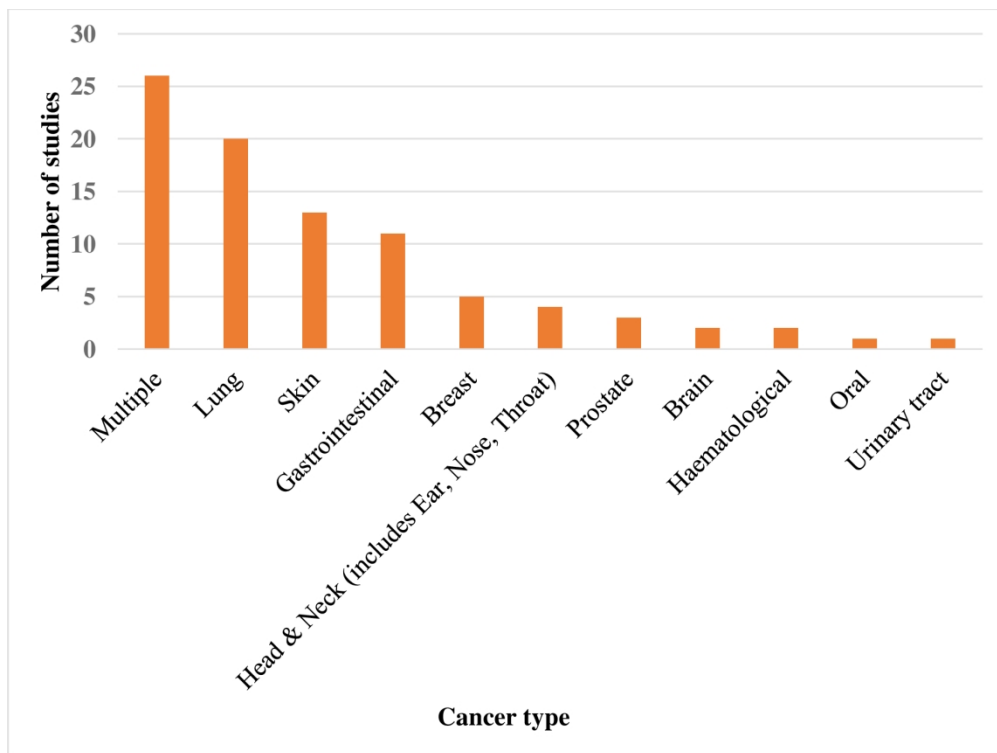

165x123mm (300 x 300 DPI)

1  
2  
3  
4  
5  
6  
7  
8  
9  
10  
11  
12  
13  
14  
15  
16  
17  
18  
19  
20  
21  
22  
23  
24  
25  
26  
27  
28  
29  
30  
31  
32  
33  
34  
35  
36  
37  
38  
39  
40  
41  
42  
43  
44  
45  
46  
47  
48  
49  
50  
51  
52  
53  
54  
55  
56  
57  
58  
59  
60

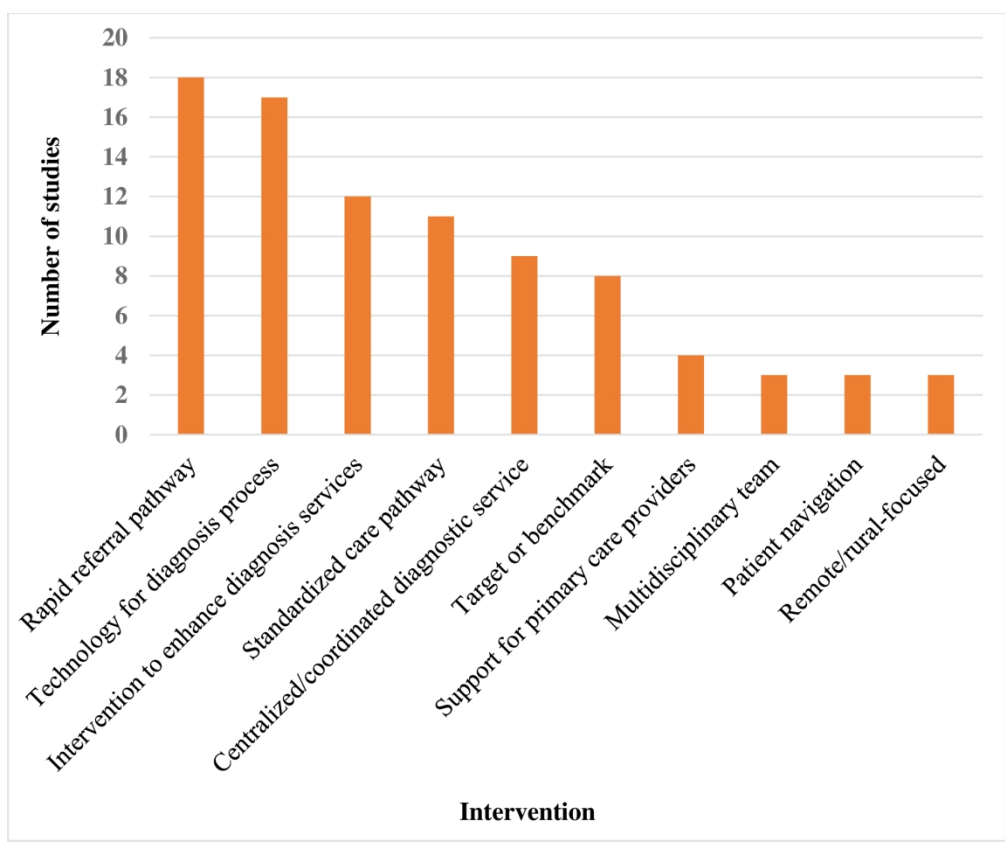

165x137mm (300 x 300 DPI)

## Appendices

### Appendix 1: Project work plan

#### About the Project Team

At the Knowledge Synthesis Team, George and Fay Yee Centre for Healthcare Innovation, we have an experienced team of methodologists, systematic reviewers, a medical librarian and biostatistician. Over the past 8 years we have supported numerous research teams and guideline developers by providing training, support and conducting evidence syntheses on their behalf. In addition, several of our team members hold academic positions with the University of Manitoba where they teach, supervise students, and advance the science and practice of knowledge synthesis.

#### Proposed Method

##### Methods

Using a team of experienced systematic reviews and methodologists, with expertise in research methodology, knowledge synthesis and implementation science, we will update the 2018 peer-reviewed and grey literature scan by conducting a rapid scoping review to include contemporary, national and international leading interventions for improving accurate and timely cancer diagnosis focusing on the symptomatic population and summarize efficacy, impact and sustainability of identified interventions. We will identify evidence to answer the following key questions:

KQ 1. Are there practice guidelines, care pathways or other initiatives (e.g., benchmarks/ targets for wait times, streamlined or rapid diagnostic services, multidisciplinary teams, patient navigators and/or navigation, etc.) that have been found to streamline and enhance accurate and timely diagnosis in symptomatic individuals?

- How were patients involved in the design, development and/ or implementation of these initiatives?
- How were providers (e.g., primary care providers) involved in the design, development and/or implementation of these initiatives?

KQ 2. What are the leading interventions for innovative and/or virtual approaches (e.g., technology-based) to seamless care (i.e., minimally disruptive care that is found to be more convenient/coordinated/timely/less stressful to the patients) in the pre-diagnosis phase within Canada and abroad?

- How have these interventions been applied, including identification of successes and lessons learned where possible?
- Were these interventions evaluated and if so, what were the findings?
- How were patients involved in the design, development and/ or implementation of these interventions?

KQ 3. What are the identified performance metrics that can be used to measure the suspicion to diagnosis phase; and where and how are these metrics used?

- Are there specific metrics used to measure the patient experience?
- What data is captured by decision-support systems and how does the data and clinical systems work together?
- Is there evidence on sustainability of the model?

KQ 4. What are the key points of care in a patient's experience (e.g., diagnostic tests, physician consultations, etc.) as they navigate the system from initial symptoms/ suspicion of cancer to diagnosis?

1  
2  
3  
4 KQ 5. Have specific considerations been applied to underserved populations including Indigenous,  
5 rural, and remote populations within the context of each of the questions above?  
6

### 7 **Study eligibility criteria**

8 This review will focus on published and unpublished studies that answer the key questions since 2017.  
9 Our focus is on comparative studies that applied a protocol/guideline or a specific intervention or  
10 intervention plan. Having said that, we anticipate the need to review lower quality study designs (e.g.,  
11 retrospective, and uncontrolled studies). As such, there will be no restriction on the study design, but will  
12 be limited to English language publications for feasibility.  
13

### 14 **Search strategy and study selection**

15 A knowledge synthesis librarian has designed and executed a literature search strategy in MEDLINE  
16 (Ovid). The search strategy was peer-reviewed by a second librarian and adapted for other bibliographic  
17 databases: Cinahl (Ebsco) and Psycinfo (Ovid). Search strategies are presented in Appendix 1. All  
18 retrieved records were imported into EndNote for citation management.  
19 One reviewer will screen each identified citation for eligibility. Full texts of all relevant citations will be  
20 reviewed by two reviewers. All conflicts will be resolved by discussion and/ or a third reviewer, as  
21 needed. We will record the number of ineligible citations at the title/ abstract screening stage, and both  
22 the number and reason for ineligibility at the full-text articles.  
23  
24

### 25 **Data extraction**

26 We will develop data extraction forms and pilot them on a small selection of studies. Extracted data will  
27 be stored and managed in MS Excel. One reviewer will independently extract data from included studies  
28 and another reviewer will independently check the extracted data for errors. Disagreements will be  
29 resolved by discussion between reviewers and/ or by involving a third reviewer, as needed.  
30

### 31 **Data analysis**

32 We will present specific characteristics of all included studies in a tabular form. The analysis of the  
33 extracted data will be descriptive.  
34

### 35 **Study dissemination**

36 We will submit reports from this study as a technical report to CPAC.  
37  
38  
39  
40

## 41 **Knowledge User Engagement Plan**

42 We will be providing a bi-weekly update to CPAC on the progression of the review. Specifically, we will  
43 engage during specific time points to review progress and next steps:  
44

- 45 - Protocol
- 46 - Level I Screening (Title/ Abstract screening phase)
- 47 - Level II Screening (Full-text screening phase)
- 48 - Data Extraction
- 49 - Data Analysis
- 50 - Report
- 51

## 52 **Declaration of Conflict of Interest**

53  
54  
55 None  
56  
57

**Appendix 2: MEDLINE (Ovid) search strategy**

|     |                                                                                                                                                                                                                                                                                                                                                                                                                                                                                                                                                                                                                                                                                                                                                                                 |         |
|-----|---------------------------------------------------------------------------------------------------------------------------------------------------------------------------------------------------------------------------------------------------------------------------------------------------------------------------------------------------------------------------------------------------------------------------------------------------------------------------------------------------------------------------------------------------------------------------------------------------------------------------------------------------------------------------------------------------------------------------------------------------------------------------------|---------|
| 1.  | "early detection of cancer"/                                                                                                                                                                                                                                                                                                                                                                                                                                                                                                                                                                                                                                                                                                                                                    | 26241   |
| 2.  | (cancer* or tumor* or neoplasm* or malignan* or metasta* or oncogen* or oncolog*).ti                                                                                                                                                                                                                                                                                                                                                                                                                                                                                                                                                                                                                                                                                            | 1795604 |
| 3.  | (carcinoma* or adenoma* or adenocarcinoma* or adeno-carcinoma* or blastoma* or carcinosarcoma* or carcino-sarcoma* or leukemia* or leukaemia* or lymphoma* or melanoma* or mesenchymoma* or mesothelioma* or sarcoma* or thymoma*).ti                                                                                                                                                                                                                                                                                                                                                                                                                                                                                                                                           | 844480  |
| 4.  | or/2-3                                                                                                                                                                                                                                                                                                                                                                                                                                                                                                                                                                                                                                                                                                                                                                          | 2477759 |
| 5.  | 1 or 4                                                                                                                                                                                                                                                                                                                                                                                                                                                                                                                                                                                                                                                                                                                                                                          | 2483642 |
| 6.  | early diagnosis/ or delayed diagnosis/                                                                                                                                                                                                                                                                                                                                                                                                                                                                                                                                                                                                                                                                                                                                          | 33272   |
| 7.  | (prediagnos* or pre-diagnos* or care path? or cancer path? or care pathway* or cancer pathway* or diagnos* phase* or diagnos* path? or referral path? or diagnos* pathway* or referral pathway* or diagnos* interval* or referral interval* or consult* interval* or "time-to-treat" or "time-to-treatment").ti,ab,kf.                                                                                                                                                                                                                                                                                                                                                                                                                                                          | 26471   |
| 8.  | ((early or earlier or prompt* or late or later or rapid or wait* or delay* or timel* or longtime or interval* or route*) adj3 (diagnos* or refer or referred or referral* or referring or consult*).ti,ab,kf.                                                                                                                                                                                                                                                                                                                                                                                                                                                                                                                                                                   | 214615  |
| 9.  | ((diagnos* or confirm* or refer* or consult* or investigat*) adj4 (timelapse* or time lapse* or time elapse* or fasttrack* or fast-track* or timeline* or time line*).ti,ab                                                                                                                                                                                                                                                                                                                                                                                                                                                                                                                                                                                                     | 1510    |
| 10. | delay*.ti                                                                                                                                                                                                                                                                                                                                                                                                                                                                                                                                                                                                                                                                                                                                                                       | 74391   |
| 11. | wait* time*.ti,ab.                                                                                                                                                                                                                                                                                                                                                                                                                                                                                                                                                                                                                                                                                                                                                              | 13384   |
| 12. | or/6-11                                                                                                                                                                                                                                                                                                                                                                                                                                                                                                                                                                                                                                                                                                                                                                         | 338665  |
| 13. | 4 and 12                                                                                                                                                                                                                                                                                                                                                                                                                                                                                                                                                                                                                                                                                                                                                                        | 58490   |
| 14. | diagnos*.ti,ab,kf                                                                                                                                                                                                                                                                                                                                                                                                                                                                                                                                                                                                                                                                                                                                                               | 2562935 |
| 15. | 13 and (1 or 14)                                                                                                                                                                                                                                                                                                                                                                                                                                                                                                                                                                                                                                                                                                                                                                | 48832   |
| 16. | (interprofessional* or inter-professional* or multidisciplin* or multi-disciplin* or navigator* or coordinator* or co-ordinator* or ((patient* or cancer* or care) adj2 (navigat* or coordinat* or co-ordinat* or journey* or continuum*)) or mobile or phone* or smartphone* or reminder* or tele* or information technolog* or communicat*).ti                                                                                                                                                                                                                                                                                                                                                                                                                                | 177088  |
| 17. | 16 and 5                                                                                                                                                                                                                                                                                                                                                                                                                                                                                                                                                                                                                                                                                                                                                                        | 10725   |
| 18. | 15 or 17                                                                                                                                                                                                                                                                                                                                                                                                                                                                                                                                                                                                                                                                                                                                                                        | 59240   |
| 19. | limit 18 to english language                                                                                                                                                                                                                                                                                                                                                                                                                                                                                                                                                                                                                                                                                                                                                    | 49045   |
| 20. | (exp animal experiment/ or exp animal model/ or exp transgenic animal/ or animal/ or chordata/ or vertebrate/ or tetrapod/ or amniote/ or exp amphibia/ or mammal/ or exp reptile/ or therian/ or placental mammals/ or exp marsupial/ or euarchontoglires/ or exp xenarthra/ or primate/ or exp scandentia/ or haplorhini/ or exp prosimian/ or simian/ or exp tarsiiiform/ or catarrhini/ or exp platyrrhini/ or ape/ or exp cercopithecidae/ or hominid/ or exp hylobatidae/ or exp chimpanzee/ or exp gorilla/ or (animal or animals or pisces or fish or fishes or catfish or catfishes or sheatfish or silurus or arius or heteropneustes or clarias or gariepinus or fathead minnow or fathead minnows or pimephales or promelas or cichlidae or trout or trouts or char | 4778446 |

1 or chars or salvelinus or salmo or oncorhynchus or guppy or guppies or millionfish or poecilia  
 2 or goldfish or goldfishes or carassius or auratus or mullet or mullets or mugil or curema or  
 3 shark or sharks or cod or cods or gadus or morhua or carp or carps or cyprinus or carpio or  
 4 killifish or eel or eels or anguilla or zander or sander or lucioperca or stizostedion or turbot or  
 5 turbot or psetta or flatfish or flatfishes or plaice or pleuronectes or platessa or tilapia or  
 6 tilapias or oreochromis or sarotherodon or common sole or dover sole or solea or zebrafish or  
 7 zebrafishes or danio or rerio or seabass or dicentrarchus or labrax or morone or lamprey or  
 8 lampreys or petromyzon or pumpkinseed or pumpkinseeds or lepomis or gibbosus or herring  
 9 or clupea or harengus or amphibia or amphibian or amphibians or anura or salientia or frog or  
 10 frogs or rana or toad or toads or bufo or xenopus or laevis or bombina or epidalea or calamita  
 11 or salamander or salamanders or newt or newts or triturus or reptilia or reptile or reptiles or  
 12 bearded dragon or pogona or vitticeps or iguana or iguanas or lizard or lizards or anguis  
 13 fragilis or turtle or turtles or snakes or snake or aves or bird or birds or quail or quails or  
 14 coturnix or bobwhite or colinus or virginianus or poultry or poultries or fowl or fowls or  
 15 chicken or chickens or gallus or zebra finch or taeniopygia or guttata or canary or canaries or  
 16 serinus or canaria or parakeet or parakeets or grasskeet or parrot or parrots or psittacine or  
 17 psittacines or shelduck or tadorna or goose or geese or branta or leucopsis or woodlark or  
 18 lullula or flycatcher or ficedula or hypoleuca or dove or doves or geopelia or cuneata or duck  
 19 or ducks or greylag or graylag or anser or harrier or circus pygargus or red knot or great knot  
 20 or calidris or canutus or godwit or limosa or lapponica or meleagris or gallopavo or jackdaw or  
 21 corvus or monedula or ruff or philomachus or pugnax or lapwing or peewit or plover or  
 22 vanellus or swan or cygnus or columbianus or bewickii or gull or chroicocephalus or  
 23 ridibundus or albifrons or great tit or parus or aythya or fuligula or streptopelia or risoria or  
 24 spoonbill or platalea or leucorodia or blackbird or turdus or merula or blue tit or cyanistes or  
 25 pigeon or pigeons or columba or pintail or anas or starling or sturnus or owl or athene noctua  
 26 or pochard or ferina or cockatiel or nymphicus or hollandicus or skylark or alauda or tern or  
 27 sterna or teal or crecca or oystercatcher or haematopus or ostralegus or shrew or shrews or  
 28 sorex or araneus or crocidura or russula or european mole or talpa or chiroptera or bat or bats  
 29 or eptesicus or serotinus or myotis or dasycneme or daubentonii or pipistrelle or pipistrellus or  
 30 cat or cats or felis or catus or feline or dog or dogs or canis or canine or canines or otter or  
 31 otters or lutra or badger or badgers or meles or fitchew or fitch or fougart or foulmart or  
 32 ferrets or ferret or polecat or polecats or mustela or putorius or weasel or weasels or fox or  
 33 foxes or vulpes or common seal or phoca or vitulina or grey seal or halichoerus or horse or  
 34 horses or equus or equine or equidae or donkey or donkeys or mule or mules or pig or pigs or  
 35 swine or swines or hog or hogs or boar or boars or porcine or piglet or piglets or sus or scrofa  
 36 or llama or llamas or lama or glama or deer or deers or cervus or elaphus or cow or cows or  
 37 bos taurus or bos indicus or bovine or bull or bulls or cattle or bison or bisons or sheep or  
 38 sheeps or ovis aries or ovine or lamb or lambs or mouflon or mouflons or goat or goats or  
 39 capra or caprine or chamois or rupicapra or leporidae or lagomorpha or lagomorph or rabbit or  
 40 rabbits or oryctolagus or cuniculus or laprine or hares or lepus or rodentia or rodent or rodents  
 41 or murinae or mouse or mice or mus or musculus or murine or woodmouse or apodemus or rat  
 42 or rats or rattus or norvegicus or guinea pig or guinea pigs or cavia or porcellus or hamster or  
 43 hamsters or mesocricetus or cricetus or cricetus or gerbil or gerbils or jird or jirds or  
 44 meriones or unguiculatus or jerboa or jerboas or jaculus or chinchilla or chinchillas or beaver  
 45 or beavers or castor fiber or castor canadensis or sciuridae or squirrel or squirrels or sciurus or  
 46 chipmunk or chipmunks or marmot or marmots or marmota or suslik or susliks or  
 47 spermophilus or cynomys or cottonrat or cottonrats or sigmodon or vole or voles or microtus  
 48 or myodes or glareolus or primate or primates or prosimian or prosimians or lemur or lemurs  
 49 or lemuridae or loris or bush baby or bush babies or bushbaby or bushbabies or galago or  
 50 galagos or anthropoidea or anthropoids or simian or simians or monkey or monkeys or

|     |                                                                                                                                                                                                                                                                                                                                                                                                                                                                                                                                                                                                                                                                                                                                                                                                                                                                                                               |       |
|-----|---------------------------------------------------------------------------------------------------------------------------------------------------------------------------------------------------------------------------------------------------------------------------------------------------------------------------------------------------------------------------------------------------------------------------------------------------------------------------------------------------------------------------------------------------------------------------------------------------------------------------------------------------------------------------------------------------------------------------------------------------------------------------------------------------------------------------------------------------------------------------------------------------------------|-------|
|     | marmoset or marmosets or callithrix or cebuella or tamarin or tamarins or saguinus or leontopithecus or squirrel monkey or squirrel monkeys or saimiri or night monkey or night monkeys or owl monkey or owl monkeys or douroucoulis or aotus or spider monkey or spider monkeys or ateles or baboon or baboons or papio or rhesus monkey or macaque or macaca or mulatta or cynomolgus or fascicularis or green monkey or green monkeys or chlorocebus or vervet or vervets or pygerythrus or hominoidea or ape or apes or hylobatidae or gibbon or gibbons or siamang or siamangs or nomascus or symphalangus or hominidae or orangutan or orangutans or pongo or chimpanzee or chimpanzees or pan troglodytes or bonobo or bonobos or pan paniscus or gorilla or gorillas or troglodytes).ti,ab,kf.) not (human/ or (human\$ or man or men or woman or women or child or children or patient\$).ti,ab,kf.) |       |
| 21. | 19 not 20                                                                                                                                                                                                                                                                                                                                                                                                                                                                                                                                                                                                                                                                                                                                                                                                                                                                                                     | 48488 |
| 22. | limit 21 to yr="2017 -Current"                                                                                                                                                                                                                                                                                                                                                                                                                                                                                                                                                                                                                                                                                                                                                                                                                                                                                | 15342 |

**Appendix 3: CINAHL (EbscoHOST) search strategy**

|     |                                                                                                                                                                                                                                                                                                                                                                                                                                                                                                                                                                                                                                                                                                                                                                            |        |
|-----|----------------------------------------------------------------------------------------------------------------------------------------------------------------------------------------------------------------------------------------------------------------------------------------------------------------------------------------------------------------------------------------------------------------------------------------------------------------------------------------------------------------------------------------------------------------------------------------------------------------------------------------------------------------------------------------------------------------------------------------------------------------------------|--------|
| 1.  | (MH "early detection of cancer")                                                                                                                                                                                                                                                                                                                                                                                                                                                                                                                                                                                                                                                                                                                                           | 9365   |
| 2.  | TI (cancer* OR tumo#r* OR neoplasm* OR malignan* OR metasta* OR oncogen* OR oncolog*)                                                                                                                                                                                                                                                                                                                                                                                                                                                                                                                                                                                                                                                                                      | 382286 |
| 3.  | TI (carcinoma* OR adenoma* OR adenocarcinoma* OR blastoma* OR carcinosarcoma* OR leukemia* OR leukaemia* OR lymphoma* OR melanoma* OR mesenchymoma* OR mesothelioma* OR sarcoma* OR thymoma*)                                                                                                                                                                                                                                                                                                                                                                                                                                                                                                                                                                              | 110746 |
| 4.  | S2 OR S3                                                                                                                                                                                                                                                                                                                                                                                                                                                                                                                                                                                                                                                                                                                                                                   | 469442 |
| 5.  | S1 OR S4                                                                                                                                                                                                                                                                                                                                                                                                                                                                                                                                                                                                                                                                                                                                                                   | 471736 |
| 6.  | (MH "early diagnosis") OR (MH "diagnosis, delayed")                                                                                                                                                                                                                                                                                                                                                                                                                                                                                                                                                                                                                                                                                                                        | 14703  |
| 7.  | ( TI (prediagnos* OR "pre-diagnosis" OR (care N1 path#) OR (cancer N1 path#) OR (care N1 pathway*) OR (cancer N1 pathway*) OR (diagnos* N1 phase*) OR (diagnos* N1 path#) OR (referral N1 path#) OR (diagnos* N1 pathway*) OR (referral N1 pathway*) OR (diagnos* N1 interval*) OR (referral N1 interval*) OR (consult* N1 interval*) OR "time-to-treat" OR "time-to-treatment") ) OR ( AB (prediagnos* OR "pre-diagnosis" OR (care N1 path#) OR (cancer N1 path#) OR (care N1 pathway*) OR (cancer N1 pathway*) OR (diagnos* N1 phase*) OR (diagnos* N1 path#) OR (referral N1 path#) OR (diagnos* N1 pathway*) OR (referral N1 pathway*) OR (diagnos* N1 interval*) OR (referral N1 interval*) OR (consult* N1 interval*) OR "time-to-treat" OR "time-to-treatment") ) ) | 11308  |
| 8.  | (TI ((early OR earlier OR prompt* OR late OR later OR rapid OR wait* OR delay* OR timel* OR longtime OR interval* OR route*) N3 (diagnos* OR refer OR referred OR referral* OR referring OR consult*)) OR (AB ((early OR earlier OR prompt* OR late OR later OR rapid OR wait* OR delay* OR timel* OR longtime OR interval* OR route*) N3 (diagnos* OR refer OR referred OR referral* OR referring OR consult*)))                                                                                                                                                                                                                                                                                                                                                          | 47662  |
| 9.  | (TI ((diagnos* OR confirm* OR refer* OR consult* OR investigat*) N4 (timelapse* OR (time N1 lapse*) OR (time N1 elapse*) OR fasttrack* OR (fast N1 track*) OR timeline* OR (time N1 line*))) OR (AB ((diagnos* OR confirm* OR refer* OR consult* OR investigat*) N4 (timelapse* OR (time N1 lapse*) OR (time N1 elapse*) OR fasttrack* OR (fast N1 track*) OR timeline* OR (time N1 line*))))                                                                                                                                                                                                                                                                                                                                                                              | 582    |
| 10. | TI delay*                                                                                                                                                                                                                                                                                                                                                                                                                                                                                                                                                                                                                                                                                                                                                                  | 17790  |
| 11. | (TI (wait* N1 time*)) OR (AB (wait* N1 time*))                                                                                                                                                                                                                                                                                                                                                                                                                                                                                                                                                                                                                                                                                                                             | 6047   |
| 12. | S6 OR S7 OR S8 OR S9 OR S10 OR S11                                                                                                                                                                                                                                                                                                                                                                                                                                                                                                                                                                                                                                                                                                                                         | 88476  |
| 13. | S4 AND S12                                                                                                                                                                                                                                                                                                                                                                                                                                                                                                                                                                                                                                                                                                                                                                 | 13005  |
| 14. | (TI diagnos*) OR (AB diagnos*)                                                                                                                                                                                                                                                                                                                                                                                                                                                                                                                                                                                                                                                                                                                                             | 526863 |
| 15. | S13 AND (S1 OR S14)                                                                                                                                                                                                                                                                                                                                                                                                                                                                                                                                                                                                                                                                                                                                                        | 9687   |
| 16. | TI (interprofessional* OR (inter N1 professional*) OR multidisciplin* OR (multi N1 disciplin*) OR navigator* OR coordinator* OR ordinator* OR ((patient* OR cancer* OR care) N2 (navigat* OR coordinat* OR ordinat* OR journey* OR continuum*)) OR mobile OR phone* OR smartphone* OR reminder* OR tele* OR (information N1 technolog*) OR communicat*)                                                                                                                                                                                                                                                                                                                                                                                                                    | 94165  |
| 17. | S16 AND S5                                                                                                                                                                                                                                                                                                                                                                                                                                                                                                                                                                                                                                                                                                                                                                 | 5442   |
| 18. | S15 OR S17                                                                                                                                                                                                                                                                                                                                                                                                                                                                                                                                                                                                                                                                                                                                                                 | 14982  |
| 19. | S18 Limiters - English Language                                                                                                                                                                                                                                                                                                                                                                                                                                                                                                                                                                                                                                                                                                                                            | 14767  |
| 20. | ((MH "animals+") OR (MH invertebrates+) OR (MH birds+) OR (MH fish) OR (MH "frogs and toads") OR (MH "animals, genetically modified") OR (MH reptiles+) OR (MH mammals) OR (MH bats) OR (MH camels) OR (MH cats) OR (MH cattle) OR (MH dogs) OR (MH dolphins) OR (MH goats) OR (MH horses) OR (MH rabbits) OR (MH rodents+) OR (MH                                                                                                                                                                                                                                                                                                                                                                                                                                         | 216053 |



1  
 2  
 3  
 4 sheep) OR (MH swine) OR (MH primates) OR (animal OR animals OR pisces OR fish OR  
 5 fishes OR catfish OR catfishes OR sheatfish OR silurus OR arius OR heteropneustes OR  
 6 clarias OR gariepinus OR "fathead minnow" OR "fathead minnows" OR pimephales OR  
 7 promelas OR cichlidae OR trout OR trouts OR char OR chars OR salvelinus OR salmo OR  
 8 oncorhynchus OR guppy OR guppies OR millionfish OR poecilia OR goldfish OR goldfishes  
 9 OR carassius OR auratus OR mullet OR mullets OR mugil OR curema OR shark OR sharks  
 10 OR cod OR cods OR gadus OR morhua OR carp OR carps OR cyprinus OR carpio OR  
 11 killifish OR eel OR eels OR anguilla OR zander OR sander OR lucioperca OR stizostedion  
 12 OR turbot OR turbots OR psetta OR flatfish OR flatfishes OR plaice OR pleuronectes OR  
 13 platessa OR tilapia OR tilapias OR oreochromis OR sarotherodon OR "common sole" OR  
 14 "dover sole" OR solea OR zebrafish OR zebrafishes OR danio OR rerio OR seabass OR  
 15 dicentrarchus OR labrax OR morone OR lamprey OR lampreys OR petromyzon OR  
 16 pumpkinseed OR pumpkinseeds OR lepromis OR gibbosus OR herring OR clupea OR  
 17 harengus OR amphibia OR amphibian OR amphibians OR anura OR salientia OR frog OR  
 18 frogs OR rana OR toad OR toads OR bufo OR xenopus OR laevis OR bombina OR epidalea  
 19 OR calamita OR salamander OR salamanders OR newt OR newts OR triturus OR reptilia OR  
 20 reptile OR reptiles OR "bearded dragon" OR pogona OR vitticeps OR iguana OR iguanas OR  
 21 lizard OR lizards OR "anguis fragilis" OR turtle OR turtles OR snakes OR snake OR aves OR  
 22 bird OR birds OR quail OR quails OR coturnix OR bobwhite OR colinus OR virginianus OR  
 23 poultry OR poultries OR fowl OR fowls OR chicken OR chickens OR gallus OR "zebra  
 24 finch" OR taeniopygia OR guttata OR canary OR canaries OR serinus OR canaria OR  
 25 parakeet OR parakeets OR grasskeet OR parrot OR parrots OR psittacine OR psittacines OR  
 26 shelduck OR tadorna OR goose OR geese OR branta OR leucopsis OR woodlark OR lullula  
 27 OR flycatcher OR ficedula OR hypoleuca OR dove OR doves OR geopelia OR cuneata OR  
 28 duck OR ducks OR greylag OR graylag OR anser OR harrier OR circus pygargus OR red knot  
 29 OR "great knot" OR calidris OR canutus OR godwit OR limosa OR lapponica OR meleagris  
 30 OR gallopavo OR jackdaw OR corvus OR monedula OR ruff OR philomachus OR pugnax  
 31 OR lapwing OR peewit OR plover OR vanellus OR swan OR cygnus OR columbianus OR  
 32 bewickii OR gull OR chroicocephalus OR ridibundus OR albifrons OR "great tit" OR parus  
 33 OR aythya OR fuligula OR streptopelia OR risoria OR spoonbill OR platalea OR leucorodia  
 34 OR blackbird OR turdus OR merula OR blue tit OR cyanistes OR pigeon OR pigeons OR  
 35 columba OR pintail OR anas OR starling OR sturnus OR owl OR "athene noctua" OR  
 36 pochard OR ferina OR cockatiel OR nymphicus OR hollandicus OR skylark OR alauda OR  
 37 tern OR sterna OR teal OR crecca OR oystercatcher OR haematopus OR ostralegus OR shrew  
 38 OR shrews OR sorex OR araneus OR crocidura OR russula OR "european mole" OR talpa  
 39 OR chiroptera OR bat OR bats OR eptesicus OR serotinus OR myotis OR dasycneme OR  
 40 daubentonii OR pipistrelle OR pipistrellus OR cat OR cats OR felis OR catus OR feline OR  
 41 dog OR dogs OR canis OR canine OR canines OR otter OR otters OR lutra OR badger OR  
 42 badgers OR meles OR fitchew OR fitch OR fougart OR foulmart OR ferrets OR ferret OR  
 43 polecat OR polecats OR mustela OR putorius OR weasel OR weasels OR fox OR foxes OR  
 44 vulpes OR "common seal" OR phoca OR vitulina OR grey seal OR halichoerus OR horse OR  
 45 horses OR equus OR equine OR equidae OR donkey OR donkeys OR mule OR mules OR pig  
 46 OR pigs OR swine OR swines OR hog OR hogs OR boar OR boars OR porcine OR piglet OR  
 47 piglets OR sus OR scrofa OR llama OR llamas OR lama OR glama OR deer OR deers OR  
 48 cervus OR elaphus OR cow OR cows OR "bos taurus" OR "bos indicus" OR bovine OR bull  
 49 OR bulls OR cattle OR bison OR bisons OR sheep OR sheeps OR "ovis aries" OR ovine OR  
 50 lamb OR lambs OR mouflon OR mouflons OR goat OR goats OR capra OR caprine OR  
 51 chamois OR rupicapra OR leporidae OR lagomorpha OR lagomorph OR rabbit OR rabbits  
 52 OR oryctolagus OR cuniculus OR laprine OR hares OR lepus OR rodentia OR rodent OR  
 53 rodents OR murinae OR mouse OR mice OR mus OR musculus OR murine OR woodmouse  
 54  
 55  
 56  
 57  
 58  
 59  
 60

|     |                                                                                                                                                                                                                                                                                                                                                                                                                                                                                                                                                                                                                                                                                                                                                                                                                                                                                                                                                                                                                                                                                                                                                                                                                                                                                                                                                                                                                                                                                                                                                                                                                                                                                                                                                                                        |       |
|-----|----------------------------------------------------------------------------------------------------------------------------------------------------------------------------------------------------------------------------------------------------------------------------------------------------------------------------------------------------------------------------------------------------------------------------------------------------------------------------------------------------------------------------------------------------------------------------------------------------------------------------------------------------------------------------------------------------------------------------------------------------------------------------------------------------------------------------------------------------------------------------------------------------------------------------------------------------------------------------------------------------------------------------------------------------------------------------------------------------------------------------------------------------------------------------------------------------------------------------------------------------------------------------------------------------------------------------------------------------------------------------------------------------------------------------------------------------------------------------------------------------------------------------------------------------------------------------------------------------------------------------------------------------------------------------------------------------------------------------------------------------------------------------------------|-------|
|     | OR apodemus OR rat OR rats OR rattus OR norvegicus OR "guinea pig" OR "guinea pigs" OR cavia OR porcellus OR hamster OR hamsters OR mesocricetus OR cricetus OR gerbil OR gerbils OR jird OR jirds OR meriones OR unguiculatus OR jerboa OR jerboas OR jaculus OR chinchilla OR chinchillas OR beaver OR beavers OR "castor fiber" OR "castor canadensis" OR sciuridae OR squirrel OR squirrels OR sciurus OR chipmunk OR chipmunks OR marmot OR marmots OR marmota OR suslik OR susliks OR spermophilus OR cynomys OR cottonrat OR cottonrats OR sigmodon OR vole OR voles OR microtus OR myodes OR glareolus OR primate OR primates OR prosimian OR prosimians OR lemur OR lemurs OR lemuridae OR loris OR "bush baby" OR "bush babies" OR bushbaby OR bushbabies OR galago OR galagos OR anthropoidea OR anthropoids OR simian OR simians OR monkey OR monkeys OR marmoset OR marmosets OR callithrix OR cebuella OR tamarin OR tamarins OR saguinus OR leontopithecus OR squirrel monkey OR squirrel monkeys OR saimiri OR "night monkey" OR "night monkeys" OR "owl monkey" OR "owl monkeys" OR douroucoulis OR aotus OR "spider monkey" OR "spider monkeys" OR ateles OR baboon OR baboons OR papio OR "rhesus monkey" OR macaque OR macaca OR mulatta OR cynomolgus OR fascicularis OR "green monkey" OR "green monkeys" OR chlorocebus OR vervet OR vervets OR pygerythrus OR hominoidea OR ape OR apes OR hylobatidae OR gibbon OR gibbons OR siamang OR siamangs OR nomascus OR symphalangus OR hominidae OR orangutan OR orangutans OR pongo OR chimpanzee OR chimpanzees OR "pan troglodytes" OR bonobo OR bonobos OR "pan paniscus" OR gorilla OR gorillas OR troglodytes)) NOT ((MH human) OR (human# OR man OR men OR woman OR women OR child OR children OR patient#)) |       |
| 21. | S19 NOT S20                                                                                                                                                                                                                                                                                                                                                                                                                                                                                                                                                                                                                                                                                                                                                                                                                                                                                                                                                                                                                                                                                                                                                                                                                                                                                                                                                                                                                                                                                                                                                                                                                                                                                                                                                                            | 14678 |
| 22. | S21 Limiters - Published Date: 20170101-20201231                                                                                                                                                                                                                                                                                                                                                                                                                                                                                                                                                                                                                                                                                                                                                                                                                                                                                                                                                                                                                                                                                                                                                                                                                                                                                                                                                                                                                                                                                                                                                                                                                                                                                                                                       | 5333  |

**Appendix 4: Psycinfo (Ovid) search strategy**

|     |                                                                                                                                                                                                                                                                                                                                                                                                                                                                                                                                                                                                                                                                                                                                                                                                                                                                                                                                                                                                                                                                                                                                                                                                                                                                                                                                                                                                                                                                                                                                                                                                                                                                                   |        |
|-----|-----------------------------------------------------------------------------------------------------------------------------------------------------------------------------------------------------------------------------------------------------------------------------------------------------------------------------------------------------------------------------------------------------------------------------------------------------------------------------------------------------------------------------------------------------------------------------------------------------------------------------------------------------------------------------------------------------------------------------------------------------------------------------------------------------------------------------------------------------------------------------------------------------------------------------------------------------------------------------------------------------------------------------------------------------------------------------------------------------------------------------------------------------------------------------------------------------------------------------------------------------------------------------------------------------------------------------------------------------------------------------------------------------------------------------------------------------------------------------------------------------------------------------------------------------------------------------------------------------------------------------------------------------------------------------------|--------|
| 1.  | cancer screening/                                                                                                                                                                                                                                                                                                                                                                                                                                                                                                                                                                                                                                                                                                                                                                                                                                                                                                                                                                                                                                                                                                                                                                                                                                                                                                                                                                                                                                                                                                                                                                                                                                                                 | 4776   |
| 2.  | (cancer* or tumor* or neoplasm* or malignan* or metasta* or oncogen* or oncolog*).ti                                                                                                                                                                                                                                                                                                                                                                                                                                                                                                                                                                                                                                                                                                                                                                                                                                                                                                                                                                                                                                                                                                                                                                                                                                                                                                                                                                                                                                                                                                                                                                                              | 44464  |
| 3.  | (carcinoma* or adenoma* or adenocarcinoma* or adeno-carcinoma* or blastoma* or carcinosarcoma* or carcino-sarcoma* or leukemia* or leukaemia* or lymphoma* or melanoma* or mesenchymoma* or mesothelioma* or sarcoma* or thymoma*).ti                                                                                                                                                                                                                                                                                                                                                                                                                                                                                                                                                                                                                                                                                                                                                                                                                                                                                                                                                                                                                                                                                                                                                                                                                                                                                                                                                                                                                                             | 2705   |
| 4.  | or/2-3                                                                                                                                                                                                                                                                                                                                                                                                                                                                                                                                                                                                                                                                                                                                                                                                                                                                                                                                                                                                                                                                                                                                                                                                                                                                                                                                                                                                                                                                                                                                                                                                                                                                            | 46737  |
| 5.  | 1 or 4                                                                                                                                                                                                                                                                                                                                                                                                                                                                                                                                                                                                                                                                                                                                                                                                                                                                                                                                                                                                                                                                                                                                                                                                                                                                                                                                                                                                                                                                                                                                                                                                                                                                            | 47903  |
| 6.  | (prediagnos* or pre-diagnos* or care path? or cancer path? or care pathway* or cancer pathway* or diagnos* phase* or diagnos* path? or referral path? or diagnos* pathway* or referral pathway* or diagnos* interval* or referral interval* or consult* interval* or "time-to-treat" or "time-to-treatment").ti,ab,id.                                                                                                                                                                                                                                                                                                                                                                                                                                                                                                                                                                                                                                                                                                                                                                                                                                                                                                                                                                                                                                                                                                                                                                                                                                                                                                                                                            | 3896   |
| 7.  | ((early or earlier or prompt* or late or later or rapid or wait* or delay* or timel* or longtime or interval* or route*) adj3 (diagnos* or refer or referred or referral* or referring or consult*).ti,ab,id.                                                                                                                                                                                                                                                                                                                                                                                                                                                                                                                                                                                                                                                                                                                                                                                                                                                                                                                                                                                                                                                                                                                                                                                                                                                                                                                                                                                                                                                                     | 13853  |
| 8.  | ((diagnos* or confirm* or refer* or consult* or investigat*) adj4 (timelapse* or time lapse* or time elapse* or fasttrack* or fast-track* or timeline* or time line*).ti,ab                                                                                                                                                                                                                                                                                                                                                                                                                                                                                                                                                                                                                                                                                                                                                                                                                                                                                                                                                                                                                                                                                                                                                                                                                                                                                                                                                                                                                                                                                                       | 168    |
| 9.  | delay*.ti                                                                                                                                                                                                                                                                                                                                                                                                                                                                                                                                                                                                                                                                                                                                                                                                                                                                                                                                                                                                                                                                                                                                                                                                                                                                                                                                                                                                                                                                                                                                                                                                                                                                         | 14212  |
| 10. | wait* time*.ti,ab.                                                                                                                                                                                                                                                                                                                                                                                                                                                                                                                                                                                                                                                                                                                                                                                                                                                                                                                                                                                                                                                                                                                                                                                                                                                                                                                                                                                                                                                                                                                                                                                                                                                                | 1957   |
| 11. | or/6-10                                                                                                                                                                                                                                                                                                                                                                                                                                                                                                                                                                                                                                                                                                                                                                                                                                                                                                                                                                                                                                                                                                                                                                                                                                                                                                                                                                                                                                                                                                                                                                                                                                                                           | 33241  |
| 12. | 4 and 11                                                                                                                                                                                                                                                                                                                                                                                                                                                                                                                                                                                                                                                                                                                                                                                                                                                                                                                                                                                                                                                                                                                                                                                                                                                                                                                                                                                                                                                                                                                                                                                                                                                                          | 1613   |
| 13. | diagnos*.ti,ab,id                                                                                                                                                                                                                                                                                                                                                                                                                                                                                                                                                                                                                                                                                                                                                                                                                                                                                                                                                                                                                                                                                                                                                                                                                                                                                                                                                                                                                                                                                                                                                                                                                                                                 | 324967 |
| 14. | 12 and (1 or 13)                                                                                                                                                                                                                                                                                                                                                                                                                                                                                                                                                                                                                                                                                                                                                                                                                                                                                                                                                                                                                                                                                                                                                                                                                                                                                                                                                                                                                                                                                                                                                                                                                                                                  | 1345   |
| 15. | (interprofessional* or inter-professional* or multidisciplin* or multi-disciplin* or navigator* or coordinator* or co-ordinator* or ((patient* or cancer* or care) adj2 (navigat* or coordinat* or co-ordinat* or journey* or continuum*)) or mobile or phone* or smartphone* or reminder* or tele* or information technolog* or communicat*).ti                                                                                                                                                                                                                                                                                                                                                                                                                                                                                                                                                                                                                                                                                                                                                                                                                                                                                                                                                                                                                                                                                                                                                                                                                                                                                                                                  | 81166  |
| 16. | 15 and 5                                                                                                                                                                                                                                                                                                                                                                                                                                                                                                                                                                                                                                                                                                                                                                                                                                                                                                                                                                                                                                                                                                                                                                                                                                                                                                                                                                                                                                                                                                                                                                                                                                                                          | 1650   |
| 17. | 14 or 16                                                                                                                                                                                                                                                                                                                                                                                                                                                                                                                                                                                                                                                                                                                                                                                                                                                                                                                                                                                                                                                                                                                                                                                                                                                                                                                                                                                                                                                                                                                                                                                                                                                                          | 2949   |
| 18. | limit 17 to english language                                                                                                                                                                                                                                                                                                                                                                                                                                                                                                                                                                                                                                                                                                                                                                                                                                                                                                                                                                                                                                                                                                                                                                                                                                                                                                                                                                                                                                                                                                                                                                                                                                                      | 2756   |
| 19. | (exp animal research/ or animal models/ or exp animals/ or ("20").po or (animal or animals or pisces or fish or fishes or catfish or catfishes or sheatfish or silurus or arius or heteropneustes or clarias or gariiepinus or fathead minnow or fathead minnows or pimephales or promelas or cichlidae or trout or trouts or char or chars or salvelinus or salmo or oncorhynchus or guppy or guppies or millionfish or poecilia or goldfish or goldfishes or carassius or auratus or mullet or mullets or mugil or curema or shark or sharks or cod or cods or gadus or morhua or carp or carps or cyprinus or carpio or killifish or eel or eels or anguilla or zander or sander or lucioperca or stizostedion or turbot or turbots or psetta or flatfish or flatfishes or plaice or pleuronectes or platessa or tilapia or tilapias or oreochromis or sarotherodon or common sole or dover sole or solea or zebrafish or zebrafishes or danio or rerio or seabass or dicentrarchus or labrax or morone or lamprey or lampreys or petromyzon or pumpkinseed or pumpkinseeds or lepomis or gibbosus or herring or clupea or harengus or amphibia or amphibian or amphibians or anura or salientia or frog or frogs or rana or toad or toads or bufo or xenopus or laevis or bombina or epidalea or calamita or salamander or salamanders or newt or newts or triturus or reptilia or reptile or reptiles or bearded dragon or pogona or vitticeps or iguana or iguanas or lizard or lizards or anguis fragilis or turtle or turtles or snakes or snake or aves or bird or birds or quail or quails or coturnix or bobwhite or colinus or virginianus or poultry or poultries or | 339315 |

|     |                                                                                                                                                                                                                                                                                                                                                                                                                                                                                                                                                                                                                                                                                                                                                                                                                                                                                                                                                                                                                                                                                                                                                                                                                                                                                                                                                                                                                                                                                                                                                                                                                                                                                                                                                                                                                                                                                                                                                                                                                                                                                                                                                                                                                                                                                                                                                                                                                                                                                                                                                                                                                                                                                                                                                                                                                                                                                                                                                                                                                                                                                                                                                                                                                                                                                                                                                                                                                                                                                                                                                                                                                                                                                                                                                                                                                                                                                                                                                                                                                                                                                                                                                                                                                                                                                                                                                                                                                     |      |
|-----|---------------------------------------------------------------------------------------------------------------------------------------------------------------------------------------------------------------------------------------------------------------------------------------------------------------------------------------------------------------------------------------------------------------------------------------------------------------------------------------------------------------------------------------------------------------------------------------------------------------------------------------------------------------------------------------------------------------------------------------------------------------------------------------------------------------------------------------------------------------------------------------------------------------------------------------------------------------------------------------------------------------------------------------------------------------------------------------------------------------------------------------------------------------------------------------------------------------------------------------------------------------------------------------------------------------------------------------------------------------------------------------------------------------------------------------------------------------------------------------------------------------------------------------------------------------------------------------------------------------------------------------------------------------------------------------------------------------------------------------------------------------------------------------------------------------------------------------------------------------------------------------------------------------------------------------------------------------------------------------------------------------------------------------------------------------------------------------------------------------------------------------------------------------------------------------------------------------------------------------------------------------------------------------------------------------------------------------------------------------------------------------------------------------------------------------------------------------------------------------------------------------------------------------------------------------------------------------------------------------------------------------------------------------------------------------------------------------------------------------------------------------------------------------------------------------------------------------------------------------------------------------------------------------------------------------------------------------------------------------------------------------------------------------------------------------------------------------------------------------------------------------------------------------------------------------------------------------------------------------------------------------------------------------------------------------------------------------------------------------------------------------------------------------------------------------------------------------------------------------------------------------------------------------------------------------------------------------------------------------------------------------------------------------------------------------------------------------------------------------------------------------------------------------------------------------------------------------------------------------------------------------------------------------------------------------------------------------------------------------------------------------------------------------------------------------------------------------------------------------------------------------------------------------------------------------------------------------------------------------------------------------------------------------------------------------------------------------------------------------------------------------------------------------------|------|
|     | <p>fowl or fowls or chicken or chickens or gallus or zebra finch or taeniopygia or guttata or canary or canaries or serinus or canaria or parakeet or parakeets or grasskeet or parrot or parrots or psittacine or psittacines or shelduck or tadorna or goose or geese or branta or leucopsis or woodlark or lullula or flycatcher or ficedula or hypoleuca or dove or doves or geopelia or cuneata or duck or ducks or greylag or graylag or anser or harrier or circus pygargus or red knot or great knot or calidris or canutus or godwit or limosa or lapponica or meleagris or gallopavo or jackdaw or corvus or monedula or ruff or philomachus or pugnax or lapwing or peewit or plover or vanellus or swan or cygnus or columbianus or bewickii or gull or chroicocephalus or ridibundus or albifrons or great tit or parus or aythya or fuligula or streptopelia or risoria or spoonbill or platalea or leucorodia or blackbird or turdus or merula or blue tit or cyanistes or pigeon or pigeons or columba or pintail or anas or starling or sturnus or owl or athene noctua or pochard or ferina or cockatiel or nymphicus or hollandicus or skylark or alauda or tern or sterna or teal or crecca or oystercatcher or haematopus or ostralegus or shrew or shrews or sorex or araneus or crocidura or russula or european mole or talpa or chiroptera or bat or bats or eptesicus or serotinus or myotis or dasycneme or daubentonii or pipistrelle or pipistrellus or cat or cats or felis or catus or feline or dog or dogs or canis or canine or canines or otter or otters or lutra or badger or badgers or meles or fitchew or fitch or fountmart or foulmart or ferrets or ferret or polecat or polecats or mustela or putorius or weasel or weasels or fox or foxes or vulpes or common seal or phoca or vitulina or grey seal or halichoerus or horse or horses or equus or equine or equidae or donkey or donkeys or mule or mules or pig or pigs or swine or swines or hog or hogs or boar or boars or porcine or piglet or piglets or sus or scrofa or llama or llamas or lama or glama or deer or deers or cervus or elaphus or cow or cows or bos taurus or bos indicus or bovine or bull or bulls or cattle or bison or bisons or sheep or sheeps or ovis aries or ovine or lamb or lambs or mouflon or mouflons or goat or goats or capra or caprine or chamois or rupicapra or leporidae or lagomorpha or lagomorph or rabbit or rabbits or oryctolagus or cuniculus or laprine or hares or lepus or rodentia or rodent or rodents or murinae or mouse or mice or mus or musculus or murine or woodmouse or apodemus or rat or rats or rattus or norvegicus or guinea pig or guinea pigs or cavia or porcellus or hamster or hamsters or mesocricetus or cricetus or gerbil or gerbils or jird or jirds or meriones or unguiculatus or jerboa or jerboas or jaculus or chinchilla or chinchillas or beaver or beavers or castor fiber or castor canadensis or sciuridae or squirrel or squirrels or sciurus or chipmunk or chipmunks or marmot or marmots or marmota or suslik or susliks or spermophilus or cynomys or cottonrat or cottonrats or sigmodon or vole or voles or microtus or myodes or glareolus or primate or primates or prosimian or prosimians or lemur or lemurs or lemuridae or loris or bush baby or bush babies or bushbaby or bushbabies or galago or galagos or anthropoidea or anthropoids or simian or simians or monkey or monkeys or marmoset or marmosets or callithrix or cebuella or tamarin or tamarins or saguinus or leontopithecus or squirrel monkey or squirrel monkeys or saimiri or night monkey or night monkeys or owl monkey or owl monkeys or douroucoulis or aotus or spider monkey or spider monkeys or ateles or baboon or baboons or papio or rhesus monkey or macaque or macaca or mulatta or cynomolgus or fascicularis or green monkey or green monkeys or chlorocebus or vervet or vervets or pygerythrus or hominoidea or ape or apes or hylobatidae or gibbon or gibbons or siamang or siamangs or nomascus or symphalangus or hominidae or orangutan or orangutans or pongo or chimpanzee or chimpanzees or pan troglodytes or bonobo or bonobos or pan paniscus or gorilla or gorillas or troglodytes).ti,ab,id.) not ("10").po or (human\$ or man or men or woman or women or child or children or patient\$).ti,ab,id.)</p> |      |
| 20. | 18 not 19                                                                                                                                                                                                                                                                                                                                                                                                                                                                                                                                                                                                                                                                                                                                                                                                                                                                                                                                                                                                                                                                                                                                                                                                                                                                                                                                                                                                                                                                                                                                                                                                                                                                                                                                                                                                                                                                                                                                                                                                                                                                                                                                                                                                                                                                                                                                                                                                                                                                                                                                                                                                                                                                                                                                                                                                                                                                                                                                                                                                                                                                                                                                                                                                                                                                                                                                                                                                                                                                                                                                                                                                                                                                                                                                                                                                                                                                                                                                                                                                                                                                                                                                                                                                                                                                                                                                                                                                           | 2754 |
| 21. | limit 20 to yr="2017 -Current"                                                                                                                                                                                                                                                                                                                                                                                                                                                                                                                                                                                                                                                                                                                                                                                                                                                                                                                                                                                                                                                                                                                                                                                                                                                                                                                                                                                                                                                                                                                                                                                                                                                                                                                                                                                                                                                                                                                                                                                                                                                                                                                                                                                                                                                                                                                                                                                                                                                                                                                                                                                                                                                                                                                                                                                                                                                                                                                                                                                                                                                                                                                                                                                                                                                                                                                                                                                                                                                                                                                                                                                                                                                                                                                                                                                                                                                                                                                                                                                                                                                                                                                                                                                                                                                                                                                                                                                      | 608  |

## Appendix 5: Websites of relevant organizations and professional bodies searched for literature

### Canada

- Alberta Cancer Foundation
- BC Cancer Foundation
- BC Cancer Agency
- Cancer Care Manitoba
- Cancer Care Nova Scotia
- Cancer Care Ontario
- CancerControl Alberta
- Canada Health Infoway
- Canadian Association of Nurses in Oncology
- Canadian Association of Psychosocial Oncology
- Canadian Cancer Society
- Canadian Foundation for Healthcare Improvement
- Canadian Foundation for Innovation
- Canadian Institutes of Health Research
- Cancer and Primary Care Research
- Cancer Quality Council of Ontario
- Cancerview.ca
- CanIMPACT
- College of Family Physicians of Canada
- International Network
- New Brunswick Cancer Network
- Ontario Institute for Cancer Research
- Quebec Health and Social Services (Direction québécoise de cancérologie, Ministère de la Santé et des Services sociaux)
- Royal College of Physicians and Surgeons of Canada
- Saskatchewan Cancer Agency
- Trillium Health Partners

### International

- Association of Community Cancer Centres – USA
- Centers for Disease Control and Prevention – USA
- Commission on Cancer of the American College of Surgeons – USA
- Institute of Medicine – USA
- National Cancer Institute – USA
- National Comprehensive Cancer Network – USA
- Cancer Research UK (including the Accelerate, Coordinate, Evaluate Programme) – UK
- Kings Fund – UK
- National Health Service (NHS) – UK
- National Institute for Health and Care Excellence (NICE) – UK
- Northern Cancer Network – New Zealand
- Cancer Australia – Australia
- Sax Institute – Australia
- Denmark (Ministry of Health)
- Sweden (Ministry of Health)
- European Organization for Research and Treatment of Cancer – Europe
- European Society for Medical Oncology – Europe
- European Partnership Action Against Cancer – Europe
- World Health Organization – International

## Appendix 6: Definition for interventions related to the review questions

- *Centralized or coordinated diagnostic service*: Brings together various tests/procedures and care providers needed to determine a definitive diagnosis at one location.
- *Interventions in diagnostic services*: An initiative that aims to improve diagnostic services within a jurisdiction.
- *Multidisciplinary team*: Working with multiple departments, such as diagnostic imaging, pathology, medical oncology, and research.
- *Patient navigation*: A dedicated role to help facilitate the navigation for patients across the cancer journey – helps the patient through testing, appointments, health literacy, etc.
- *Rapid referral pathway*: Provides urgent access to specialists and/or diagnostic services for patients.
- *Remote or rural populations*: This refers to populations that may live in non-urban areas. They often do not have access to the same services as those who reside in more urban areas.
- *Standardized care pathway*: Sets expectations for cancer care based on evidence and shares information about how to provide and what care to provide at each point of diagnosis, treatment, and survivorship. Initiative is often integrated into the current health system.
- *Support for primary care providers*: Initiative focusing on educating and supporting primary care providers on care pathways and how to care for individuals presenting with potential or confirmed cancer symptoms.
- *Target or benchmark*: A figure used as a goal by jurisdictions to measure progress towards the desired outcome of an initiative.
- *Technology to support diagnosis process*: Technological innovations to enhance efficiency of initiatives.



**Appendix 7:** Summary of the characteristics of the included published articles that reported data on ineffective interventions

| Interventions                                       | Article                       | Study country (Region) | Study type (Study years)     | Cancer type (Population) [Sample size]                       | Assessment metric                                           | Result                                                                                                                                                                                                                                                          |
|-----------------------------------------------------|-------------------------------|------------------------|------------------------------|--------------------------------------------------------------|-------------------------------------------------------------|-----------------------------------------------------------------------------------------------------------------------------------------------------------------------------------------------------------------------------------------------------------------|
| <b>Interventions to enhance diagnostic services</b> | Agnarsdottir 2019             | Sweden (Uppsala)       | Cross-sectional (2016-2018)  | Skin (Adult) [286]                                           | Reporting time                                              | The reporting time increased from 18 to 31 days for the non-priority cases and from 15 to 25 days for all cases with invasive melanomas (Ineffective)                                                                                                           |
|                                                     | McCutchan 2020                | UK (Wales)             | Before-and-After (2016)      | Lung (Mixed age) [1011 (pre-campaign); 1013 (post-campaign)] | Urgent suspected referrals to specialist                    | There was no statistically significant change in urgent suspected cancer referrals ( $p = 0.82$ ) in routes to diagnosis (Ineffective)                                                                                                                          |
| <b>Multidisciplinary team</b>                       | Largey 2020                   | Australia (Victoria)   | Before-and-After (2016-2017) | Lung (Adult) [429]                                           | Time interval from referral to first specialist appointment | Referral to first specialist appointment interval was reduced in the post intervention period from median (IQR) 6 (0-15) to 4 (1-10) days, with no significant trend ( $p=0.962$ ) (Ineffective)                                                                |
|                                                     | Thalanayar Muthukrishnan 2020 | USA (Cleveland)        | Case-Control (2015-2017)     | Lung (NR) [161]                                              | Time interval from suspicion to diagnosis                   | The mean time intervals for imaging to staging (with standard deviations) were 65 days in controls ( $SD=42.67$ ) and 75 days ( $SD=58.27$ ) in tumor board cases ( $p=0.39$ ) (Ineffective)                                                                    |
| Interventions                                       | Article                       | Study country (Region) | Study type (Study years)     | Cancer type (Population) [Sample size]                       | Assessment metric                                           | Result                                                                                                                                                                                                                                                          |
| <b>Rapid referral pathway</b>                       | Fallon 2019                   | UK (Luton)             | Case-Control (2015-2017)     | Gastrointestinal (Adult) [509 (148 UGI; 361 LGI)]            | Stage of malignancy at time of presentation                 | Two weeks wait referral did not achieve an earlier diagnosis compared with non-2 week wait routes of referral in upper gastrointestinal ( $\chi^2(3)=2.6$ , $p=0.458$ ) and lower gastrointestinal ( $\chi^2(3)=0.884$ , $p=0.829$ ) malignancies (Ineffective) |
|                                                     | Jefferson 2019                | UK                     | Cross-sectional (2016-2018)  | Multiple (Adult) [24]                                        | Factors affecting patients' non-                            | The following were identified: system flaws; GP difficulties with booking                                                                                                                                                                                       |

|                                  |                |                               |                                 |                                               |                                                                        |                                                                                                                                                                                                                                                                                                              |
|----------------------------------|----------------|-------------------------------|---------------------------------|-----------------------------------------------|------------------------------------------------------------------------|--------------------------------------------------------------------------------------------------------------------------------------------------------------------------------------------------------------------------------------------------------------------------------------------------------------|
|                                  |                | (A Northern English city)     |                                 |                                               | attendance following referral                                          | appointments; patient difficulties with navigating the appointment system, patients leading ‘difficult lives’; and patients’ expectations of the referral, informed by their beliefs, circumstances, priorities, and the perceived prognosis (Ineffective)                                                   |
|                                  | Kassirian 2020 | Canada (London, Ontario)      | Cross-sectional (2017-2018)     | Ear, Nose and Throat (Adult) [102]            | Time from presentation to appointment at the multi-disciplinary clinic | The average time for patients to have their first appointment was 15.1 months, consisting of 3.9 months for patients to see a health care provider for the first time since symptom onset and 10.7 months from first appointment to being seen at the clinic – representing significant delays (Ineffective) |
|                                  | Neal 2017      | UK (Wales; Yorkshire)         | RCT (2012-2015)                 | Lung (Adult) [255]                            | Anxiety and depression scores                                          | There was no evidence of a difference in post-randomisation anxiety scores between trial arms (median (IQR): 6 (3–8) in control vs 5 (3–9) in intervention, z=0.32; P=0.75) (Ineffective)                                                                                                                    |
|                                  | Scott 2020     | UK (Countrywide)              | Case-Control (2009-2011)        | Multiple (Mixed age) [10314]                  | Cancer occurrence 5 years after negative diagnosis                     | 4.0% for those referred via pathway and 2.1% for those routinely referred (Ineffective)                                                                                                                                                                                                                      |
|                                  | Talwar 2020    | UK (Merseyside)               | Cross-sectional (2017-2019)     | Head and Neck (NR) [113]                      | Time from referral to being seen in hospital                           | The time taken from referral to being seen in hospital was a median (IQR) of 10 (6–13) days (range 1–28 days) with 11/110 (10%) exceeding 14 days (Ineffective)                                                                                                                                              |
| <b>Interventions</b>             | <b>Article</b> | <b>Study country (Region)</b> | <b>Study type (Study years)</b> | <b>Cancer type (Population) [Sample size]</b> | <b>Assessment metric</b>                                               | <b>Result</b>                                                                                                                                                                                                                                                                                                |
| <b>Standardized care pathway</b> | Almuammar 2019 | Saudi Arabia (Countrywide)    | Cross-sectional (2010-2012)     | Multiple (Adult) [20]                         | Patient satisfaction with GP in the pathway                            | Patients felt that GPs did not listen to them, and were likely to undermine the role of GPs as active practitioners in healthcare provision (Ineffective)                                                                                                                                                    |
|                                  | Gardner 2020   | UK (Edinburgh)                | Case-Control (2016-2018)        | Ear, Nose and Throat                          | Time from referral to diagnosis                                        | Patients referred by GP on the ‘urgent suspicion of cancer’ pathway were seen more quickly than those referred                                                                                                                                                                                               |



|                                                   |                     |                                   |                                     |                                                         |                                                                                          |                                                                                                                                                                                                                                                 |
|---------------------------------------------------|---------------------|-----------------------------------|-------------------------------------|---------------------------------------------------------|------------------------------------------------------------------------------------------|-------------------------------------------------------------------------------------------------------------------------------------------------------------------------------------------------------------------------------------------------|
|                                                   |                     |                                   |                                     | (Mixed age)<br>[62]                                     |                                                                                          | routinely were. However, these differences were not significant (Ineffective)                                                                                                                                                                   |
|                                                   | Iachina 2017        | Denmark<br>(Countrywide)          | Case-Control<br>(2008-2012)         | Lung<br>(Adult) [11273]                                 | Time from referral to<br>end of primary<br>investigation                                 | Time from referral to the end of<br>primary investigation did not<br>significantly change (1.00 (0.93;1.08))<br>(Ineffective)                                                                                                                   |
|                                                   | Jensen 2017         | Denmark<br>(Countrywide)          | Case-Control<br>(2004-2010)         | Multiple<br>(Adult) [7725]                              | Mortality                                                                                | When comparing pathway-referred<br>patients against non-pathway-referred<br>patients, non-significant lower excess<br>mortality was observed among the<br>pathway referred (excess hazard ratios<br>= 0.86 (95% CI: 0.73;1.01)<br>(Ineffective) |
|                                                   | Price 2020          | UK<br>(National)                  | Cross-sectional<br>(2006-2017)      | Multiple<br>(Adult) [83935]                             | Diagnostic interval                                                                      | Median New-NICE values were<br>consistently longer (99, 40–212 in 2006<br>vs 103, 42–236 days in 2017) than Old-<br>NICE values across all cancers<br>(Ineffective)                                                                             |
| <b>Interventions</b>                              | <b>Article</b>      | <b>Study country<br/>(Region)</b> | <b>Study type<br/>(Study years)</b> | <b>Cancer type<br/>(Population)<br/>[Sample size]</b>   | <b>Assessment metric</b>                                                                 | <b>Result</b>                                                                                                                                                                                                                                   |
| <b>Support for<br/>primary care<br/>providers</b> | Evans 2018          | UK<br>(Oxfordshire)               | Cross-sectional<br>(2016-2017)      | Multiple<br>(Adult) [NR]                                | GP perspectives on<br>safety netting                                                     | GPs revealed uncertainty about which<br>aspects of clinical practice were<br>considered safety netting (Ineffective)                                                                                                                            |
|                                                   | Kidney 2017         | UK<br>(Urban West<br>Midlands)    | Cross-sectional<br>(2014)           | Gastrointestinal<br>(Adult) [NR]                        | Barriers for referral                                                                    | A desire to avoid over-referral, lack of<br>knowledge of guidelines, and the use of<br>individually derived decision rules for<br>further investigation or referral of<br>symptoms (Ineffective)                                                |
|                                                   | Zienius 2019        | UK (Scotland)                     | Cross-sectional<br>(2010-2015)      | Brain<br>(Adult) [2938]                                 | Predictive value of<br>referral guidelines for<br>imaging where a<br>tumour is suspected | With symptom-based referral<br>guidelines, primary care doctors can<br>identify patients with a 3% positive<br>predictive value (Ineffective)                                                                                                   |
|                                                   | Di Girolamo<br>2018 | UK<br>(England)                   | Cross-sectional<br>(2009-2013)      | Multiple<br>(Mixed age)<br>[360643 (CRC<br>164890, lung | 1-year survival of<br>patients                                                           | For 31-day and 62-day targets survival<br>was worse for those for whom the<br>targets were and were not met<br>(Ineffective)                                                                                                                    |

|                                                |                            |                                    |                                 |                                               |                                                       |                                                                                                                                                                                                                        |
|------------------------------------------------|----------------------------|------------------------------------|---------------------------------|-----------------------------------------------|-------------------------------------------------------|------------------------------------------------------------------------------------------------------------------------------------------------------------------------------------------------------------------------|
|                                                | 171208, ovarian<br>24545)] |                                    |                                 |                                               |                                                       |                                                                                                                                                                                                                        |
| <b>Target or benchmark for wait times</b>      | Brian 2017                 | New Zealand (Hamilton)             | Before-and-After (2016)         | Skin (Adult) [143]                            | Time to diagnosis                                     | Compliance with recommended time intervals was poor for patients referred with skin lesions suspicious for melanoma; from referral to diagnostic skin biopsy, compliance was 17.6% (Ineffective)                       |
|                                                | Venchairutti 2016          | Australia (New South Wales)        | Case-Control (2008-2013)        | Multiple (Adult) [224]                        | Time from symptom onset to diagnosis                  | Regional/remote patients had a longer interval from symptom onset to diagnosis (median 5.4 months [IQR 9.2 months]) compared with metropolitan patients (median 2.1 months [IQR 4.3 months]) (P = 0.002) (Ineffective) |
| <b>Interventions</b>                           | <b>Article</b>             | <b>Study country (Region)</b>      | <b>Study type (Study years)</b> | <b>Cancer type (Population) [Sample size]</b> | <b>Assessment metric</b>                              | <b>Result</b>                                                                                                                                                                                                          |
| <b>Technology to support diagnosis process</b> | Chung 2020                 | Netherlands (Amsterdam; Rotterdam) | Cross-sectional (2017)          | Skin (Adult) [125]                            | Risk assessment performance                           | The inter-observer agreement between the ratings of the automated risk assessment and the dermatologist was poor (Ineffective)                                                                                         |
|                                                | Lau 2018                   | UK (West Midlands and Berkshire)   | Case-Control (2009-2013)        | Multiple (Adult) [1005]                       | False-negative rate                                   | A sensitivity of 31% and specificity of 92% (Ineffective)                                                                                                                                                              |
|                                                | Pannebakker 2019           | UK (NR)                            | Cross-sectional (2016-2017)     | Skin (Adult) [14]                             | Patient perspectives on implementation and usefulness | No patients were aware that the electronic clinical decision support had been used during their consultation (Ineffective)                                                                                             |
|                                                | Walter 2020                | UK (Eastern England)               | RCT (2016-2017)                 | Skin (Adult) [238]                            | Time between first noticing a change and consultation | There were no statistically significant differences between trial groups on any of the secondary outcome measures (Ineffective)                                                                                        |

CRC = colorectal cancer; GP = general practitioner; LGI = upper gastrointestinal; NICE = National Institute for Health and Care Excellence; NR = not reported; RCT = randomized controlled trial; UGI = upper gastrointestinal; UK = United Kingdom; USA = United States of America; IQR = interquartile range

**Appendix 8:** Summary of the characteristics of the included published articles that reported data on remote or rural populations

| Article              | Study country (Region)        | Study type (Study years)     | Cancer type (Population) [Sample size] | Assessment metric                                   | Result                                                                                                                                                                                                    |
|----------------------|-------------------------------|------------------------------|----------------------------------------|-----------------------------------------------------|-----------------------------------------------------------------------------------------------------------------------------------------------------------------------------------------------------------|
| Chavarri-Guerra 2019 | Mexico (Mexico City)          | Before-and-After (2016-2017) | Multiple (Adult) [70]                  | Feasibility of patient navigation                   | All patients were from an under-served population. 91% of patients successfully obtained appointments at cancer centers in <3 months.                                                                     |
| Emery 2017           | Australia (Western Australia) | RCT (2011-2013)              | Multiple (Adult) [1358]                | Time to diagnosis                                   | All patients were from a rural population. There were no significant differences on the time to diagnosis with and without intervention.                                                                  |
| Murchie 2020         | UK (Scotland; England)        | Cross-sectional (2017)       | Multiple (Mixed age) [1314]            | Time from presentation in primary care to diagnosis | The median primary care interval was 5 days (IQR 0-23 days) and median diagnostic interval was 30 days (IQR 13-68). Diagnostic intervals were longer in the most remote patients.                         |
| Venchairutti 2016    | Australia (New South Wales)   | Case-Control (2008-2013)     | Multiple (Adult) [224]                 | Time from symptom onset to diagnosis                | Regional/remote patients had a longer interval from symptom onset to diagnosis (median 5.4 months [IQR 9.2 months]) compared with metropolitan patients (median 2.1 months [IQR 4.3 months]) (P = 0.002). |
| Yeşiler 2020         | Turkey (Ankara)               | Cross-sectional (2010-2011)  | Lung (Adult) [122]                     | Delay in diagnosis times                            | No significant difference in the mean duration from symptom onset to pathological diagnosis. No significant differences were identified based on patient residence.                                       |

UK = United Kingdom; IQR = interquartile range

**Appendix 9:** Summary of performance metrics to measure improvements in suspicion to diagnosis phase

| <b>Intervention Type</b>                      | <b>Performance Metric</b>                                                                                                                                                                                                                                                                                                                                                                                                                                                                                                                                                               |
|-----------------------------------------------|-----------------------------------------------------------------------------------------------------------------------------------------------------------------------------------------------------------------------------------------------------------------------------------------------------------------------------------------------------------------------------------------------------------------------------------------------------------------------------------------------------------------------------------------------------------------------------------------|
| Centralized or coordinated diagnostic service | <ul style="list-style-type: none"> <li>• Time from presentation in primary care to diagnosis</li> <li>• Time from referral from primary care to specialist consultation</li> <li>• Time from first abnormal image to biopsy</li> </ul>                                                                                                                                                                                                                                                                                                                                                  |
| Interventions to enhance diagnostic services  | <ul style="list-style-type: none"> <li>• Time from referral from primary care to specialist consultation</li> <li>• Time from initial specialist consultation to diagnosis</li> <li>• Time from initial specialist consultation to biopsy</li> <li>• Time from first abnormal image to biopsy</li> <li>• Time from presentation in primary care to biopsy</li> <li>• Total diagnostic interval</li> <li>• Turnaround time for diagnosis following histology</li> <li>• Number of urgent referrals to specialist</li> <li>• Cancer detection rate</li> <li>• Patient survival</li> </ul> |
| Multidisciplinary team                        | <ul style="list-style-type: none"> <li>• Time from referral from primary care to specialist consultation</li> <li>• Time from first abnormal image to diagnosis</li> </ul>                                                                                                                                                                                                                                                                                                                                                                                                              |
| Patient navigation                            | <ul style="list-style-type: none"> <li>• Waiting times from the point of referral from primary care to initial specialist assessment</li> <li>• Feasibility of program/process</li> <li>• Delays in diagnostic resolutions</li> </ul>                                                                                                                                                                                                                                                                                                                                                   |

## Preferred Reporting Items for Systematic reviews and Meta-Analyses extension for Scoping Reviews (PRISMA-ScR) Checklist

| SECTION                                               | ITEM | PRISMA-ScR CHECKLIST ITEM                                                                                                                                                                                                                                                                                  | REPORTED ON PAGE # |
|-------------------------------------------------------|------|------------------------------------------------------------------------------------------------------------------------------------------------------------------------------------------------------------------------------------------------------------------------------------------------------------|--------------------|
| <b>TITLE</b>                                          |      |                                                                                                                                                                                                                                                                                                            |                    |
| Title                                                 | 1    | Identify the report as a scoping review.                                                                                                                                                                                                                                                                   | 1                  |
| <b>ABSTRACT</b>                                       |      |                                                                                                                                                                                                                                                                                                            |                    |
| Structured summary                                    | 2    | Provide a structured summary that includes (as applicable): background, objectives, eligibility criteria, sources of evidence, charting methods, results, and conclusions that relate to the review questions and objectives.                                                                              | 4-5                |
| <b>INTRODUCTION</b>                                   |      |                                                                                                                                                                                                                                                                                                            |                    |
| Rationale                                             | 3    | Describe the rationale for the review in the context of what is already known. Explain why the review questions/objectives lend themselves to a scoping review approach.                                                                                                                                   | 7-8                |
| Objectives                                            | 4    | Provide an explicit statement of the questions and objectives being addressed with reference to their key elements (e.g., population or participants, concepts, and context) or other relevant key elements used to conceptualize the review questions and/or objectives.                                  | 8-9                |
| <b>METHODS</b>                                        |      |                                                                                                                                                                                                                                                                                                            |                    |
| Protocol and registration                             | 5    | Indicate whether a review protocol exists; state if and where it can be accessed (e.g., a Web address); and if available, provide registration information, including the registration number.                                                                                                             | 9                  |
| Eligibility criteria                                  | 6    | Specify characteristics of the sources of evidence used as eligibility criteria (e.g., years considered, language, and publication status), and provide a rationale.                                                                                                                                       | 10-11              |
| Information sources*                                  | 7    | Describe all information sources in the search (e.g., databases with dates of coverage and contact with authors to identify additional sources), as well as the date the most recent search was executed.                                                                                                  | 10                 |
| Search                                                | 8    | Present the full electronic search strategy for at least 1 database, including any limits used, such that it could be repeated.                                                                                                                                                                            | Appendix 2 - 4     |
| Selection of sources of evidence†                     | 9    | State the process for selecting sources of evidence (i.e., screening and eligibility) included in the scoping review.                                                                                                                                                                                      | 10-11              |
| Data charting process‡                                | 10   | Describe the methods of charting data from the included sources of evidence (e.g., calibrated forms or forms that have been tested by the team before their use, and whether data charting was done independently or in duplicate) and any processes for obtaining and confirming data from investigators. | 11-12              |
| Data items                                            | 11   | List and define all variables for which data were sought and any assumptions and simplifications made.                                                                                                                                                                                                     | Appendix 6         |
| Critical appraisal of individual sources of evidence§ | 12   | If done, provide a rationale for conducting a critical appraisal of included sources of evidence; describe the methods used and how this information was used in any data synthesis (if appropriate).                                                                                                      | Not applicable     |

| SECTION                                       | ITEM | PRISMA-ScR CHECKLIST ITEM                                                                                                                                                                       | REPORTED ON PAGE # |
|-----------------------------------------------|------|-------------------------------------------------------------------------------------------------------------------------------------------------------------------------------------------------|--------------------|
| Synthesis of results                          | 13   | Describe the methods of handling and summarizing the data that were charted.                                                                                                                    | 11-12              |
| <b>RESULTS</b>                                |      |                                                                                                                                                                                                 |                    |
| Selection of sources of evidence              | 14   | Give numbers of sources of evidence screened, assessed for eligibility, and included in the review, with reasons for exclusions at each stage, ideally using a flow diagram.                    | Figure 1           |
| Characteristics of sources of evidence        | 15   | For each source of evidence, present characteristics for which data were charted and provide the citations.                                                                                     | Table 1            |
| Critical appraisal within sources of evidence | 16   | If done, present data on critical appraisal of included sources of evidence (see item 12).                                                                                                      | Not applicable     |
| Results of individual sources of evidence     | 17   | For each included source of evidence, present the relevant data that were charted that relate to the review questions and objectives.                                                           | 14-24              |
| Synthesis of results                          | 18   | Summarize and/or present the charting results as they relate to the review questions and objectives.                                                                                            | 13-24              |
| <b>DISCUSSION</b>                             |      |                                                                                                                                                                                                 |                    |
| Summary of evidence                           | 19   | Summarize the main results (including an overview of concepts, themes, and types of evidence available), link to the review questions and objectives, and consider the relevance to key groups. | 25-27              |
| Limitations                                   | 20   | Discuss the limitations of the scoping review process.                                                                                                                                          | 27                 |
| Conclusions                                   | 21   | Provide a general interpretation of the results with respect to the review questions and objectives, as well as potential implications and/or next steps.                                       | 28                 |
| <b>FUNDING</b>                                |      |                                                                                                                                                                                                 |                    |
| Funding                                       | 22   | Describe sources of funding for the included sources of evidence, as well as sources of funding for the scoping review. Describe the role of the funders of the scoping review.                 | 2                  |

JBI = Joanna Briggs Institute; PRISMA-ScR = Preferred Reporting Items for Systematic reviews and Meta-Analyses extension for Scoping Reviews.

\* Where *sources of evidence* (see second footnote) are compiled from, such as bibliographic databases, social media platforms, and Web sites.

† A more inclusive/heterogeneous term used to account for the different types of evidence or data sources (e.g., quantitative and/or qualitative research, expert opinion, and policy documents) that may be eligible in a scoping review as opposed to only studies. This is not to be confused with *information sources* (see first footnote).

‡ The frameworks by Arksey and O'Malley (6) and Levac and colleagues (7) and the JBI guidance (4, 5) refer to the process of data extraction in a scoping review as data charting.

§ The process of systematically examining research evidence to assess its validity, results, and relevance before using it to inform a decision. This term is used for items 12 and 19 instead of "risk of bias" (which is more applicable to systematic reviews of interventions) to include and acknowledge the various sources of evidence that may be used in a scoping review (e.g., quantitative and/or qualitative research, expert opinion, and policy document).

From: Tricco AC, Lillie E, Zarin W, O'Brien KK, Colquhoun H, Levac D, et al. PRISMA Extension for Scoping Reviews (PRISMA-ScR): Checklist and Explanation. *Ann Intern Med.* 2018;169:467–473. doi: [10.7326/M18-0850](https://doi.org/10.7326/M18-0850).

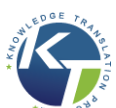

# BMJ Open

## Interventions to improve early cancer diagnosis of symptomatic individuals: A scoping review

|                                 |                                                                                                                                                                                                                                                                                                                                                                                                                                                                                                                                                                                                                                                                                                                                                                 |
|---------------------------------|-----------------------------------------------------------------------------------------------------------------------------------------------------------------------------------------------------------------------------------------------------------------------------------------------------------------------------------------------------------------------------------------------------------------------------------------------------------------------------------------------------------------------------------------------------------------------------------------------------------------------------------------------------------------------------------------------------------------------------------------------------------------|
| Journal:                        | <i>BMJ Open</i>                                                                                                                                                                                                                                                                                                                                                                                                                                                                                                                                                                                                                                                                                                                                                 |
| Manuscript ID                   | bmjopen-2021-055488.R2                                                                                                                                                                                                                                                                                                                                                                                                                                                                                                                                                                                                                                                                                                                                          |
| Article Type:                   | Original research                                                                                                                                                                                                                                                                                                                                                                                                                                                                                                                                                                                                                                                                                                                                               |
| Date Submitted by the Author:   | 20-Oct-2021                                                                                                                                                                                                                                                                                                                                                                                                                                                                                                                                                                                                                                                                                                                                                     |
| Complete List of Authors:       | Okoli, George; University of Manitoba Max Rady College of Medicine<br>Lam, Otto; University of Manitoba Max Rady College of Medicine<br>Reddy, Viraj; University of Manitoba Max Rady College of Medicine<br>Copstein, Leslie; University of Manitoba Max Rady College of Medicine<br>Askin, Nicole; University of Manitoba<br>Prashad, Anubha; Canadian Partnership Against Cancer<br>Stiff, Jennifer; Canadian Partnership Against Cancer<br>Khare, Satya Rashi; Canadian Partnership Against Cancer<br>Leonard, Robyn; Canadian Partnership Against Cancer<br>Zarin, Wasifa; Unity Health Toronto<br>Tricco, Andrea; University of Toronto Dalla Lana School of Public Health,<br><br>Abou-Setta, Ahmed; University of Manitoba Max Rady College of Medicine |
| <b>Primary Subject Heading</b>: | Oncology                                                                                                                                                                                                                                                                                                                                                                                                                                                                                                                                                                                                                                                                                                                                                        |
| Secondary Subject Heading:      | Evidence based practice, Health services research, Patient-centred medicine, Public health                                                                                                                                                                                                                                                                                                                                                                                                                                                                                                                                                                                                                                                                      |
| Keywords:                       | ONCOLOGY, PREVENTIVE MEDICINE, PRIMARY CARE, PUBLIC HEALTH                                                                                                                                                                                                                                                                                                                                                                                                                                                                                                                                                                                                                                                                                                      |
|                                 |                                                                                                                                                                                                                                                                                                                                                                                                                                                                                                                                                                                                                                                                                                                                                                 |

SCHOLARONE™  
Manuscripts

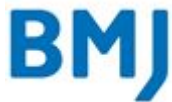

I, the Submitting Author has the right to grant and does grant on behalf of all authors of the Work (as defined in the below author licence), an exclusive licence and/or a non-exclusive licence for contributions from authors who are: i) UK Crown employees; ii) where BMJ has agreed a CC-BY licence shall apply, and/or iii) in accordance with the terms applicable for US Federal Government officers or employees acting as part of their official duties; on a worldwide, perpetual, irrevocable, royalty-free basis to BMJ Publishing Group Ltd ("BMJ") its licensees and where the relevant Journal is co-owned by BMJ to the co-owners of the Journal, to publish the Work in this journal and any other BMJ products and to exploit all rights, as set out in our [licence](#).

The Submitting Author accepts and understands that any supply made under these terms is made by BMJ to the Submitting Author unless you are acting as an employee on behalf of your employer or a postgraduate student of an affiliated institution which is paying any applicable article publishing charge ("APC") for Open Access articles. Where the Submitting Author wishes to make the Work available on an Open Access basis (and intends to pay the relevant APC), the terms of reuse of such Open Access shall be governed by a Creative Commons licence – details of these licences and which [Creative Commons](#) licence will apply to this Work are set out in our licence referred to above.

Other than as permitted in any relevant BMJ Author's Self Archiving Policies, I confirm this Work has not been accepted for publication elsewhere, is not being considered for publication elsewhere and does not duplicate material already published. I confirm all authors consent to publication of this Work and authorise the granting of this licence.



1  
2  
3 **1 Interventions to improve early cancer diagnosis of symptomatic individuals: A scoping**  
4  
5 **2 review**  
6  
7

8  
9  
10 4 George N Okoli (0000-0002-6437-930X), Otto LT Lam, Viraj K. Reddy, Leslie Copstein, Nicole  
11  
12 5 Askin, Anubha Prashad, Jennifer Stiff, Satya Rashi Khare, Robyn Leonard, Wasifa Zarin,  
13  
14 6 Andrea C Tricco (0000-0002-4114-8971), Ahmed M Abou-Setta (0000-0003-0153-9916)  
15  
16  
17 7

18  
19 8 George N Okoli (senior researcher)<sup>1</sup>  
20

21 9 Otto LT Lam (systematic reviewer)<sup>1</sup>  
22

23  
24 10 Viraj K Reddy (systematic reviewer)<sup>1</sup>  
25

26 11 Leslie Copstein (systematic reviewer)<sup>1</sup>  
27

28 12 Nicole Askin (librarian)<sup>2</sup>  
29

30 13 Anubha Prashad (commissioner)<sup>3</sup>  
31

32 14 Jennifer Stiff (commissioner)<sup>3</sup>  
33

34 15 Satya Rashi Khare (commissioner)<sup>3</sup>  
35

36 16 Robyn Leonard (commissioner)<sup>3</sup>  
37

38 17 Wasifa Zarin (research manager)<sup>4</sup>  
39

40 18 Andrea C Tricco (associate professor)<sup>4,5,6</sup>  
41

42 19 Ahmed M Abou-Setta (assistant professor)<sup>1,7</sup>  
43  
44  
45  
46  
47 20

48  
49 21 <sup>1</sup>George and Fay Yee Centre for Healthcare Innovation, Max Rady College of Medicine, Rady  
50  
51 22 Faculty of Health Sciences, University of Manitoba, Winnipeg, MB, Canada  
52

53  
54 23 <sup>2</sup>Neil John Maclean Health Sciences Library, University of Manitoba, Winnipeg, MB, Canada  
55  
56  
57  
58  
59  
60

1  
2  
3 24 <sup>3</sup>Canadian Partnership Against Cancer (the Partnership), Toronto, ON, Canada

4  
5 25 <sup>4</sup>Knowledge Translation Program, St. Michael's Hospital, Unity Health, Toronto, ON, Canada

6  
7 26 <sup>5</sup>Epidemiology Division and Institute for Health Policy, Management, and Evaluation, Dalla

8  
9 27 Lana School of Public Health, University of Toronto, Toronto, ON, Canada

10  
11 28 <sup>6</sup>Queen's Collaboration for Health Care Quality, Joanna Briggs Institute (JBI) Centre of

12  
13 29 Excellence at Queen's University, ON, Canada

14  
15 30 <sup>7</sup>Community Health Sciences, Max Rady College of Medicine, Rady Faculty of Health Sciences,

16  
17 31 University of Manitoba, Winnipeg, MB, Canada

18  
19 32

20  
21 33 **Correspondence to:** GN Okoli [George.Okoli@umanitoba.ca](mailto:George.Okoli@umanitoba.ca) George & Fay Yee Centre for

22  
23 34 Healthcare Innovation, 753 McDermot Avenue, Winnipeg, MB, R3Y 0T6, Canada

24  
25 35

26  
27 36 **Funding:** This study was funded in part by the Canadian Partnership Against Cancer (the

28  
29 37 Partnership) and the Canadian Institutes of Health Research (CIHR) under the Strategy for

30  
31 38 Patient Oriented-Research (SPOR) initiative, through the SPOR Evidence Alliance. Andrea C.

32  
33 39 Tricco is funded by a Tier 2 Canada Research Chair in Knowledge Synthesis.

34  
35 40

36  
37 41 **Competing interests declaration:** All authors declare that they have no conflicts of interest: no

38  
39 42 financial relationships with any organisations that might have an interest in the submitted work,

40  
41 43 and no relationships or activities that could appear to have influenced the submitted work.

42  
43 44

44  
45 45 **Patient consent:** Not applicable

46  
47 46

1  
2  
3 47 **Contributor and guarantor information:** Conceptualization (A Prashad, J Stiff, W Zarin, AC  
4  
5 48 Tricco); Methodology (GN Okoli, A Prashad, J Stiff, W Zarin, AC Tricco & AM Abou-Setta);  
6  
7 49 Data acquisition (GN Okoli, OLT Lam, VK Reddy, L Copstein, N Askin, & AM Abou-Setta);  
8  
9 50 Formal analysis (GN Okoli); Draft manuscript (GN Okoli & AM Abou-Setta); Final manuscript  
10  
11 51 revisions (GN Okoli, OLT Lam, VK Reddy, L Copstein, N Askin, A Prashad, J Stiff, SR Khare,  
12  
13 52 R Leonard, W Zarin, AC Tricco & AM Abou-Setta); Guarantor (GN Okoli & AM Abou-Setta).  
14  
15 53 The corresponding author (the manuscript's guarantor) attests that all listed authors meet  
16  
17 54 authorship criteria and that no others meeting the criteria have been omitted.  
18  
19  
20  
21  
22  
23

24 56 **Copyright/license for publication:** The Corresponding Author has the right to grant on behalf  
25  
26 57 of all authors and does grant on behalf of all authors, a worldwide licence to the Publishers and  
27  
28 58 its licensees in perpetuity, in all forms, formats and media (whether known now or created in the  
29  
30 59 future), to (i) publish, reproduce, distribute, display and store the Contribution, (ii) translate the  
31  
32 60 Contribution into other languages, create adaptations, reprints, include within collections and  
33  
34 61 create summaries, extracts and/or, abstracts of the Contribution, (iii) create any other derivative  
35  
36 62 work(s) based on the Contribution, (iv) to exploit all subsidiary rights in the Contribution, (v) the  
37  
38 63 inclusion of electronic links from the Contribution to third party material where-ever it may be  
39  
40 64 located, and, (vi) licence any third party to do any or all of the above.  
41  
42  
43  
44  
45  
46

47 66 **Transparency declaration:** The corresponding author affirms that the manuscript is an honest,  
48  
49 67 accurate, and transparent account of the study being reported; that no important aspects of the  
50  
51 68 study have been omitted; and that any discrepancies from the study as planned have been  
52  
53 69 explained.  
54  
55  
56  
57  
58  
59  
60

1  
2  
3 **70 Abstract**

4  
5 **71 Objectives:** To summarize the current evidence regarding interventions for accurate and timely  
6  
7 **72** cancer diagnosis among symptomatic individuals.  
8  
9

10 **73 Design:** A scoping review following the Joanna Briggs Institute's methodological framework for  
11  
12 **74** the conduct of scoping reviews and reported in accordance with the Preferred Reporting Items  
13  
14 **75** for Systematic Reviews and Meta-analyses extension for scoping reviews (PRISMA-ScR)  
15  
16 **76** checklist.  
17  
18  
19

20 **77 Data sources:** MEDLINE (Ovid), CINAHL (EBSCOhost) and PsycINFO (Ovid) bibliographic  
21  
22 **78** databases, and websites of relevant organizations. Published and unpublished literature (grey  
23  
24 **79** literature) of any study type in the English language were searched for from January 2017 to  
25  
26 **80** January 2021.  
27  
28  
29

30 **81 Eligibility and criteria:** Study participants were individuals of any age presenting at clinics with  
31  
32 **82** symptoms indicative of cancer. Interventions included practice guidelines, care pathways or  
33  
34 **83** other initiatives focused on achieving pre-defined benchmarks or targets for wait times,  
35  
36 **84** streamlined or rapid cancer diagnostic services, multidisciplinary teams, and patient navigation  
37  
38 **85** strategies. Outcomes included accuracy and timeliness of cancer diagnosis.  
39  
40  
41

42 **86 Data extraction and synthesis:** We summarized findings graphically and descriptively.  
43  
44

45 **87 Results:** From 21,298 retrieved citations, 88 unique published articles and 16 unique unpublished  
46  
47 **88** documents (on 18 study reports), met the eligibility for inclusion. About half of the published  
48  
49 **89** literature and 83% of the unpublished literature were from the United Kingdom. Most of the  
50  
51 **90** studies were on interventions in lung cancer patients. Rapid referral pathways and technology for  
52  
53 **91** supporting and streamlining the cancer diagnosis process were the most studied interventions.  
54  
55  
56  
57  
58  
59  
60

1  
2  
3 92 Interventions were mostly complex and organization-specific. Common themes among the  
4  
5 93 studies that concluded intervention was effective were multidisciplinary collaboration and the  
6  
7  
8 94 use of a nurse navigator.  
9

10 95 **Conclusions:** Multidisciplinary cooperation and involvement of a nurse navigator may be unique  
11  
12  
13 96 features to consider when designing, delivering, and evaluating interventions focused on  
14  
15 97 improving accurate and timely cancer diagnosis among symptomatic individuals. Future research  
16  
17  
18 98 should examine the effectiveness of the interventions identified through this review.  
19

20 99  
21  
22 100 **Keywords:** Early cancer diagnosis; Symptomatic individuals; Interventions; Scoping review  
23  
24  
25  
26  
27  
28  
29  
30  
31  
32  
33  
34  
35  
36  
37  
38  
39  
40  
41  
42  
43  
44  
45  
46  
47  
48  
49  
50  
51  
52  
53  
54  
55  
56  
57  
58  
59  
60

1  
2  
3 101 **Strengths and limitations of this study**  
4

- 5 102     • A knowledge synthesis librarian developed the search strategy for this review and this  
6  
7  
8 103     was peer reviewed by an independent knowledge synthesis librarian using the PRESS  
9  
10 104     checklist.  
11  
12 105     • The literature search was limited to evidence from the last 4 years and only evidence  
13  
14 106     from English-language publications and organizational websites.  
15  
16  
17 107     • This review did not summarize effectiveness of interventions across cancer patient types  
18  
19 108     and regions.  
20  
21  
22 109     • We adhered to known guidelines and standards in the conduct and reporting of the  
23  
24 110     review.  
25  
26  
27 111     • In line with the JBI's guidance for the conduct of scoping reviews, we did not attempt to  
28  
29 112     evaluate the quality of the included studies or provide an assessment of the quality of the  
30  
31 113     evidence.  
32

33 114  
34

35 115  
36

37 116  
38

39 117  
40

41 118  
42

43 119  
44

45 120  
46

47 121  
48

49 122  
50

51 123  
52  
53  
54  
55  
56  
57  
58  
59  
60

## 124 **Introduction**

125 Cancer is the second leading cause of death globally, with about 1 in 6 deaths attributable to the  
126 disease.<sup>1</sup> It was estimated in 2020 that over 19 million new cases and about 10 million deaths  
127 were attributable to cancer globally.<sup>2</sup> This rate is estimated to be over 28 million new cases by  
128 2040.<sup>2</sup> High Human Development Index (HDI) countries such as Canada will likely experience  
129 the greatest increase in incidence in absolute cancer burden, with an estimated over 4 million  
130 new cases more in 2040 compared with 2020.<sup>2</sup> This is mostly due to the growth and aging of the  
131 population and increasing prevalence of cancer risk factors.<sup>2</sup> Estimates from Canada alone  
132 suggest that every day 617 people in Canada will be diagnosed with cancer, with about 228 also  
133 dying from the disease.<sup>3</sup>

134 Although cancer can occur at any age, the risk of the disease increases with age.<sup>4</sup>  
135 Globally, cancer incidence rates vary, mostly because of differences in risk factors and early  
136 detection practices. Likewise, cancer death rates vary, partly because of differences in  
137 availability and effectiveness of cancer control strategies, such as early diagnosis and access to  
138 timely and effective treatment.<sup>2</sup> With timely diagnosis and treatment initiation, significant  
139 improvements can be made in the lives of cancer patients. Moreover, many cancers have higher  
140 curative and survival rates if diagnosed early. This means that cancer burden could be reduced  
141 substantially through early detection and management of patients who present with symptoms.<sup>5</sup>

142 When not diagnosed following early symptomatic presentation, cancer diagnosis often  
143 occurs at more advanced stages of the disease, when treatment may be less effective and cancer  
144 prognosis will be poor. Early cancer diagnosis of symptomatic individuals entails carefully  
145 planned, well-integrated, culturally safe and equitable clinical evaluation and diagnostic

1  
2  
3 146 services.<sup>5</sup> These services should be designed to reduce delays in and barriers to diagnosis to  
4  
5 147 allow detection at earlier stages of the disease and commence treatment in a timely manner.  
6

7  
8 148 Various service-focused interventions to improve early cancer diagnosis of symptomatic  
9  
10 149 individuals have been implemented in various jurisdictions with varying levels of success.

11  
12 150 Knowledge of the available interventions, strategies used to implement them, and how successful  
13  
14 151 they might have been is necessary to inform the development, implementation, and evaluation of  
15  
16 152 effective early cancer diagnosis initiatives.  
17  
18

19 153  
20  
21  
22  
23  
24  
25  
26  
27  
28  
29  
30  
31  
32  
33  
34  
35  
36  
37  
38  
39  
40  
41  
42  
43  
44  
45  
46  
47  
48  
49  
50  
51  
52  
53  
54  
55  
56  
57  
58  
59  
60



## 154 **Methods**

155 This report is a summary of the study commissioned by the Canadian Partnership Against Cancer  
156 (the Partnership). The Partnership contributed to specifying the study objectives and questions,  
157 and in summarizing the evidence.

158 We undertook a scoping review following the Joanna Briggs Institute's (JBI's) guidance  
159 for the conduct of scoping reviews.<sup>6</sup> This framework includes defining and aligning the  
160 objective(s) and question(s) for the review, developing and aligning the inclusion criteria with  
161 the review objective(s) and question(s), and describing the planned approach to evidence  
162 searching. It also includes selecting, extracting, and charting of evidence; summarizing the  
163 evidence in relation to the objectives and questions; and consultation of information scientists,  
164 librarians, and/or experts throughout the process. **Appendix 1** is the work plan approved by the  
165 Partnership for the scoping review.

166 We summarized the current evidence regarding interventions focused on improving  
167 accurate and timely cancer diagnosis among symptomatic individuals, including practice  
168 guidelines, care pathways or targets for wait times, streamlined or rapid diagnostic services,  
169 multidisciplinary teams, and patient navigation strategies. We also summarized innovative  
170 interventions (for example, those with a technological component) and approaches to seamless  
171 (minimally disruptive) care of symptomatic individuals and identified performance metrics that  
172 can be used to measure improvements in the pre-diagnosis phase. Additionally, we summarized  
173 the key points of the patient trajectory from initial symptom presentation to cancer diagnosis.

174 We report our findings in accordance with the Preferred Reporting Items for Systematic  
175 Reviews and Meta-analyses extension for Scoping Reviews (PRISMA-ScR) checklist.<sup>7</sup>

176

### 177 *Search strategy*

178 A knowledge synthesis librarian (NA) designed a search strategy for MEDLINE (Ovid). This  
179 search strategy was peer-reviewed independently by another knowledge synthesis librarian using  
180 the Peer Review of Electronic Search Strategies (PRESS) checklist.<sup>8</sup> The revised search strategy  
181 was then adapted for Cumulative Index to Nursing and Allied Health Literature (CINAHL)  
182 (EBSCOhost) and PsycINFO (Ovid) bibliographic databases. The search strategy for each of the  
183 databases is presented in the appendices (**Appendix 2 - 4**). In addition to searching bibliographic  
184 databases, we searched websites of relevant organizations and professional bodies (**Appendix 5**)  
185 and hand-searched reference lists of potentially relevant publications.

### 187 *Study selection criteria and data extraction*

188 We sought to summarize practice guidelines, care pathways and initiatives such as  
189 benchmarks/targets for wait times, streamlined or rapid diagnostic services, multidisciplinary  
190 teams, and patient navigation strategies that have been found to enhance accurate and timely  
191 cancer diagnosis in symptomatic individuals. We also sought to summarize the leading  
192 interventions to seamless care in the cancer pre-diagnosis phase, performance metrics that can be  
193 used to measure the suspicion to diagnosis phase and how these metrics have been used. Further,  
194 we sought for specific considerations for underserved populations in studies, including  
195 considerations for Indigenous, rural, and remote populations.

196 Published (peer-reviewed) and unpublished (grey literature) articles in the English  
197 language from January 2017 to January 2021 were included. The decision to include articles  
198 from 2017 was because the Partnership had previously summarized prior evidence, not included  
199 in this current report.<sup>9</sup> Study participants were individuals of any age presenting in any clinical

1  
2  
3 200 settings with symptoms. Interventions included practice guidelines, care pathways or other  
4  
5 201 initiatives focused on achieving pre-defined benchmarks or targets for wait times, streamlined or  
6  
7 202 rapid diagnostic services, multidisciplinary teams, and patient navigation strategies. Outcomes  
8  
9 203 included accuracy and timeliness of cancer diagnosis.

10  
11  
12 204 All retrieved citations from the literature search were imported and managed in EndNote  
13  
14 205 (Version X9). One reviewer (GNO or OLTL or VKR or LC) screened each citation for  
15  
16 206 eligibility. Two reviewers (GNO, OLTL, VKR, and LC in pairs) independently screened the full  
17  
18 207 texts of relevant citations and reviewed the reference list of the included full-text articles for  
19  
20 208 potentially relevant citations. Disagreements between the reviewers were resolved through  
21  
22 209 discussion or involvement of a third reviewer (AMAS). The number of screened citations and  
23  
24 210 both the number and reason for exclusion of full-text articles were documented. One reviewer  
25  
26 211 (GNO or OLTL or VKR or LC) performed data extraction and charting, and another reviewer  
27  
28 212 (GNO or OLTL or VKR or LC) independently checked the extracted and charted data for errors.  
29  
30 213 Disagreements between the reviewers were resolved through discussion or involvement of a third  
31  
32 214 reviewer (AMAS).

33  
34  
35  
36  
37  
38 215

### 39 216 ***Data synthesis and analysis***

40  
41  
42 217 Characteristics of the included published articles are presented in a tabular form and descriptive  
43  
44 218 analysis is reported graphically and descriptively. Characteristics of the included unpublished  
45  
46 219 articles are reported descriptively only. Relevant findings from the review of both published and  
47  
48 220 unpublished articles are summarized separately and descriptively, by review question, focusing  
49  
50 221 on the interventions related to each question. Interventions are grouped as centralized or  
51  
52 222 coordinated diagnostic service; interventions to enhance diagnostic services; multidisciplinary  
53  
54  
55  
56  
57  
58  
59  
60

1  
2  
3 223 team; patient navigation; rapid referral pathway; remote or rural populations-focused;  
4  
5 224 standardized care pathway; support for primary care providers; target or benchmark; and  
6  
7  
8 225 technology to support the diagnostic process. These interventions are defined in **Appendix 6**. We  
9  
10 226 determined the effectiveness of an intervention based on study findings and conclusions reported  
11  
12 227 by the primary study's authors with respect to intervention effect. As such, effective  
13  
14 228 interventions were those interventions that were found to have had a statistically significant  
15  
16 229 positive effect on an author-determined outcome for effectiveness evaluation. It is important to  
17  
18 230 note that the authors of this scoping review did not assess risk of bias nor rate the quality of  
19  
20 231 evidence and thus definitive conclusions on effectiveness cannot be drawn.  
21  
22  
23  
24 232

25  
26 233 ***Patient and public involvement***  
27

28 234 There was no active engagement of patients and/or members of the public.  
29  
30  
31  
32  
33  
34  
35  
36  
37  
38  
39  
40  
41  
42  
43  
44  
45  
46  
47  
48  
49  
50  
51  
52  
53  
54  
55  
56  
57  
58  
59  
60

## 235 Results

236 Out of a total of 21,298 retrieved citations, 88 unique published articles<sup>10-97</sup> and 16 unique  
237 unpublished (grey literature representing 18 different reports)<sup>98-113</sup> met the inclusion criteria. The  
238 article selection process is detailed below (**Figure 1**). Fifty-seven of the published articles were  
239 from Europe, 14 articles from North America, 9 articles from Oceania, 3 articles each from  
240 Africa and Asia, and one article each from the Middle East and South America. Almost half of  
241 these articles (n = 40) were from the United Kingdom (UK) alone. A geographic map of  
242 published articles is shown in **Figure 2**.

243 Of the 18 unpublished reports (16 articles), 83% were from the UK, 11% from Canada  
244 and 6% from the United States of America (USA). Forty percent (n = 35) of the published  
245 articles were for case-control studies, 29% (n = 26) for cross-sectional studies, 22% (n = 19) for  
246 before-and-after studies, 7% (n = 6) for randomized controlled studies, and 1% (n = 1) each for  
247 guideline development and mixed methods studies. In terms of the unpublished articles, 89% (n  
248 = 16) were before-and-after studies and the rest (n = 2) were cross-sectional studies. **Figure 3**  
249 shows the distribution of the cancer types reported by the published articles; approximately 30%  
250 (n = 26) reported on multiple cancer types, while the rest reported on specific cancer types, of  
251 which lung cancer was the most frequent (about 23% of the publications (n = 20)). Of the  
252 unpublished articles, half reported on lung cancer, 28% on multiple cancer types, 11% on breast  
253 cancer, and 5.5% each on brain and gastrointestinal cancers.

254 **Figure 4** shows the distribution of intervention types across the published articles. Nearly  
255 20% of the published articles were on rapid referral pathway interventions while less than 1%  
256 each were on multidisciplinary team, patient navigation, and remote/rural-focused interventions.  
257 Of the unpublished articles, half reported on rapid referral pathway interventions, 11% each

1  
2  
3 258 reported on standardized care pathway, target/ benchmark for wait times, and technology to  
4  
5 259 support the diagnosis process, and 5.5% each reported on centralized or coordinated diagnostic  
6  
7 260 service and interventions to enhance diagnostic services. Most of the published articles (94%; n  
8  
9 = 83) reported a performance metric used to measure an improvement in the suspicion to  
10  
11 261 diagnosis phase of cancer.  
12  
13 262

14  
15 263 Eighty-three percent (n = 73) of the articles reported either a practice guideline, care  
16  
17 264 pathway or an initiative such as benchmark/target for wait times, streamlined or rapid diagnostic  
18  
19 265 service, multidisciplinary team development, and a patient navigation strategy to enhance  
20  
21 266 accurate and timely cancer diagnosis. Thirty-one percent (n = 27) of the articles reported (not  
22  
23 267 explicitly) on a key point of care as patients navigate the health system, from initial suspicion to  
24  
25 268 diagnosis of cancer. Twenty-nine percent (n = 25) of the articles reported on a leading innovative  
26  
27 269 intervention or approach to seamless care in the pre-cancer diagnosis phase, while 4.5% (n = 4)  
28  
29 270 of the articles reported on some form of consideration for underserved populations. Some of the  
30  
31 271 articles reported on two or more of the above. Details of relevant characteristics of the published  
32  
33 272 articles are presented in **Table 1** (those reporting effective interventions) and **Appendix 7** (those  
34  
35 273 reporting ineffective interventions) and **Appendix 8** (those focused on remote/and rural  
36  
37 274 populations).  
38  
39  
40  
41  
42  
43

#### 44 276 **Initiatives to enhance accurate and timely cancer diagnosis**

45  
46 277 This review identified various initiatives to enhance accurate and timely cancer diagnosis. These  
47  
48 278 were often designed, developed, and implemented often with the involvement of primary care  
49  
50 279 providers (physicians and nurses), but not patients. These initiatives are grouped into related  
51  
52 280 interventions and the evidence regarding each intervention is discussed below.  
53  
54  
55

56 281

### 282 *Centralized or coordinated diagnostic services*

283 Nine published articles on centralized or coordinated diagnostic services for adult lung cancer (n  
284 = 5) and breast cancer (n = 4) patients were identified.<sup>20,23,32,33,44,54-56,93</sup> Five were from  
285 Canada,<sup>23,33,44,54,55</sup> and there was one each from Denmark,<sup>20</sup> New Zealand,<sup>93</sup> South Africa,<sup>56</sup> and  
286 the UK<sup>32</sup>. The focus and metrics for assessment of the effectiveness of these diagnostic services  
287 varied, but all were found to be effective. These include the rapid access to pulmonary  
288 investigation and diagnosis (RAPID) program in Wythenshawe Hospital, Manchester, UK with  
289 expedited (next working day) computed tomography (CT) and reporting in suspected lung cancer  
290 cases,<sup>32</sup> and the Thoracic Triage Panel in a tertiary care centre in St. John's, Newfoundland,  
291 Canada, a multidisciplinary centralized referral program, whose key components include a nurse  
292 navigator who coordinates patient care and act as the contact person for patients and clinicians  
293 involved in the program, weekly multidisciplinary (thoracic specialists) meetings, and regular  
294 communications with the primary care provider.<sup>23</sup> The diagnostic services also include the rapid  
295 investigation clinic in a tertiary health centre in Montreal, Canada established to coordinate and  
296 accelerate the workup of patients with suspected lung cancer,<sup>33</sup> the improved respiratory fast  
297 track clinic (RFTC) in Northland district of New Zealand that comprises reserved slots for CT  
298 for those referred with a suspicion of lung cancer, bronchoscopy slots and CT-guided biopsy,<sup>93</sup>  
299 and the Danish lung cancer package at the Center for Lung Cancer, Odense University Hospital,  
300 Odense, Denmark, a fast-track diagnostic pathway in the hospital setting.<sup>20</sup> Further, there was the  
301 rapid access breast clinic in British Columbia, Canada that provides close collaboration between  
302 clinicians and radiologists, facilitated by clinical pathways and nurse navigation,<sup>54,55</sup> the  
303 diagnostic assessment units in Ontario, Canada, focusing on diagnosis at a dedicated breast  
304 assessment unit,<sup>44</sup> and the breast clinic at a tertiary hospital in Western Cape Province of South

1  
2  
3 305 Africa, an open-access one-stop diagnostic breast clinic where women may present with a letter  
4  
5 306 from a primary level provider (nurse practitioner or doctor) and receive the same day clinical and  
6  
7 307 cytological evaluation with referral to the combined breast clinic if the breast cytology is positive  
8  
9  
10 308 for malignancy.<sup>56</sup>

11  
12 309 In addition to the above, one unpublished article was identified.<sup>113</sup> This was for the Breast  
13  
14 310 ACCESS Project in Ohio, USA, which scheduled patients for a surgical consult within 2 days  
15  
16 311 and a biopsy within 5 days after the surgical consult, with the aim of reducing wait times  
17  
18 312 between abnormal diagnostic mammogram findings to biopsy from 26 to 7 days (7-day ACCESS  
19  
20 313 goal).

21  
22 314

### 23 24 315 *Interventions to enhance diagnostic services*

25  
26 316 Twelve published articles on interventions to enhance diagnostic services were  
27  
28 317 identified.<sup>10,17,24,52,53,64,75,77,78,80,83,94</sup> These articles were focused on varied cancer types; four on  
29  
30 318 multiple cancers, two on lung cancer, two on skin cancer, and one each on breast,  
31  
32 319 gastrointestinal, haematological and prostate cancers. Four articles were from the UK,<sup>17,52,53,78</sup>  
33  
34 320 two articles each from Canada<sup>24,64</sup> and Sweden,<sup>10,80</sup> and one article each from Botswana,<sup>94</sup>  
35  
36 321 Columbia,<sup>75</sup> Indonesia,<sup>77</sup> and the USA.<sup>83</sup> The focus and metrics for assessment of the  
37  
38 322 effectiveness of the interventions varied across the publications, and while most were effective,  
39  
40 323 one intervention for lung cancer and one intervention for skin cancer in the UK<sup>53</sup> and Sweden<sup>10</sup>,  
41  
42 324 respectively, were ineffective. The effective interventions were reducing diagnosis through  
43  
44 325 emergency presentation by improving general practice referral in England, UK,<sup>52</sup> the guided  
45  
46 326 personal quality of life (QoL) feedback intervention during the Cancer Research UK's North  
47  
48 327 West regional summer roadshow in Manchester, UK, aimed at offering guided feedback about  
49  
50 328 personal QoL to adults with potential cancer symptoms, living in deprived communities to



1  
2  
3 329 promote help seeking in primary care among the communities,<sup>78</sup> the mandatory primary care  
4  
5 330 access to faecal immunochemical testing (FIT) in Nottingham, UK, integrated with the 2-week  
6  
7 331 wait pathway, aimed at improving gastrointestinal cancer diagnosis rather than relying on age  
8  
9 332 and symptoms alone,<sup>17</sup> the Stronach Regional Cancer Centre lung diagnostic assessment program  
10  
11 333 (DAP) at Southlake Regional Health Centre, Ontario, Canada, aimed at using learnings from a  
12  
13 334 Lean improvement event to provide coordinated, expedited care for all patients undergoing a  
14  
15 335 possible lung cancer diagnosis and to achieve/improve upon the provincial wait time target from  
16  
17 336 consultation to diagnosis for lung cancer patients,<sup>24</sup> the nurse practitioner-led lymphoma rapid  
18  
19 337 diagnosis clinic in a tertiary care cancer center (Princess Margaret Cancer Centre, part of  
20  
21 338 University Health Network) in Ontario, Canada, aimed at reducing wait times for a definitive  
22  
23 339 diagnosis of lymphoma,<sup>64</sup> the expedited one-stop prostate cancer diagnosis using advanced  
24  
25 340 imaging and biopsy techniques in a health institution (name not reported) in the USA, aimed at  
26  
27 341 expediting prostate cancer diagnosis.<sup>83</sup> There were also the Swedish Diagnostic Center at the  
28  
29 342 Central Hospital of Kristianstad, Sweden, introduced as a separate outpatient unit within the  
30  
31 343 Department of Internal Medicine to expedite diagnostics,<sup>80</sup> the Partners for Cancer Care and  
32  
33 344 Prevention action plan in Cali, Columbia, aimed at improving access to a coordinated program of  
34  
35 345 screening and early diagnosis of breast and cervical cancers in three health care centers that serve  
36  
37 346 subsidized populations,<sup>75</sup> the dermatology-led quality improvement initiatives in Gaborone,  
38  
39 347 Botswana, aimed at improving multispecialty care coordination,<sup>94</sup> and the culturally sensitive,  
40  
41 348 narrative self-help intervention named PERANTARA (PEngantar peRAwataN kesehaTAn  
42  
43 349 payudaRA [translated as introduction to breast health treatment]) across four hospitals in  
44  
45 350 Bandung, West Java, Indonesia, aimed at reducing time to diagnosis in women with breast  
46  
47 351 cancer symptoms.<sup>77</sup> In addition to the above, one unpublished article on the Accelerate,  
48  
49  
50  
51  
52  
53  
54  
55  
56  
57  
58  
59  
60

1  
2  
3 352 Coordinate, Evaluate (ACE) program in the UK was identified.<sup>100</sup> This program was an early  
4  
5 353 cancer diagnosis initiative and focused on testing innovations that either identify individuals at  
6  
7  
8 354 high risk of cancer earlier or streamline diagnostic pathways.

9  
10 355 The ineffective interventions were the standardized care diagnostic pathway at the  
11  
12 356 Department of Clinical Pathology, Akademiska University Hospital in Uppsala, Sweden  
13  
14 357 (introduced by the Swedish health authorities to eliminate unwanted delay in the diagnostics of  
15  
16  
17 358 melanoma)<sup>10</sup> and the 4-week national lung cancer symptom awareness campaign in Wales, UK,  
18  
19 359 aimed at increasing urgent suspected cancer referrals and clinical outcomes.<sup>53</sup>

20  
21  
22 360

### 23 361 *Multidisciplinary team*

24  
25  
26 362 Three multidisciplinary team lung cancer approaches were identified from published articles:  
27  
28 363 from the USA<sup>68,85</sup> and Australia.<sup>50</sup> The focus and metrics for assessment of the effectiveness of  
29  
30 364 the approaches varied across the publications. One approach from the USA was found to be  
31  
32  
33 365 effective,<sup>68</sup> whereas the others were found to be ineffective. The effective approach was the lung  
34  
35 366 cancer strategist program, a thoracic surgeon-guided, multidisciplinary (disciplines not reported)  
36  
37 367 care program in hospitals in Massachusetts, USA, aimed at improving timeliness of lung cancer  
38  
39  
40 368 diagnosis and treatment.<sup>68</sup> The ineffective approaches were the pre-diagnosis multidisciplinary  
41  
42 369 tumour board (physicians from radiology, medical and radiation oncology, and  
43  
44 370 pulmonary medicine) discussions in a clinic in Cleveland, USA aimed at improving the  
45  
46  
47 371 timeliness of diagnostic evaluation in lung cancer,<sup>85</sup> and the Victorian lung cancer service  
48  
49 372 redesign project in Victoria, Australia, which involved multidisciplinary (patients, governance,  
50  
51 373 administration, clinicians and health information services) evaluation aimed at quality  
52  
53  
54 374 improvement collaborative on timeliness and management in lung cancer.<sup>50</sup> In addition, nine  
55  
56 375 unpublished articles from the UK were identified.<sup>99,101-103,106,108,109,112</sup> These included four

1  
2  
3 376 articles regarding a “straight to CT access” pathway, on community pharmacy direct referral to  
4  
5 377 lung cancer pathway, rapid colorectal diagnostic pathway, and optometrist direct referral to  
6  
7  
8 378 neuroscience pathway. All but the chest x-ray pathway<sup>109</sup> were found to be effective.  
9

10 379

### 11 380 *Standardized care pathways*

12  
13  
14 381 Eleven published articles on standardized care pathways were identified.<sup>11,12,26,35,39,41,49,59,63,70,71</sup>  
15  
16 382 These articles were focused on varied cancer types (4 each for multiple cancers, and 1 each for  
17  
18 383 ear-nose-throat, urinary tract, and gastrointestinal cancers). Three articles were from  
19  
20 384 Denmark,<sup>26,39,41</sup> two from the UK,<sup>35,70</sup> and one each from Canada,<sup>59</sup> Norway,<sup>49</sup> Sweden,<sup>63</sup>  
21  
22 385 Spain,<sup>12</sup> and Saudi Arabia.<sup>11</sup> The publications were on adult patient populations with one also  
23  
24 386 involving paediatric patients. The focus and metrics for assessment of the effectiveness of the  
25  
26 387 pathways varied across the publications. The main effective pathways were the national  
27  
28 388 diagnostic cancer pathway in Norway, with recommended maximum limits for time spent in the  
29  
30 389 diagnostic process as well as mandatory reporting of the actual time intervals for all patients with  
31  
32 390 suspected lung cancer,<sup>49</sup> and the standardized triage process in the Southeastern Ontario, Canada,  
33  
34 391 which entailed a twice-weekly nurse–physician triage, preordered staging tests and scheduling  
35  
36 392 according to urgency, redirection and recommendations for inappropriate referrals, and new  
37  
38 393 small nodule clinic.<sup>59</sup> Other main effective pathways were the standardized diagnostic pathway  
39  
40 394 for suspected urothelial cancer initiated by primary healthcare providers and specialists in Skane  
41  
42 395 County, Sweden, and comprises CT urography, urinary cytology and cystoscopy,<sup>63</sup> the early  
43  
44 396 colonoscopy track (within 30 days from referral) in a tertiary referral hospital in Tenerife,  
45  
46 397 Spain,<sup>12</sup> and the fast-track cancer care pathway in Denmark (national), with maximum acceptable  
47  
48 398 time thresholds from referral to diagnosis and treatment.<sup>39</sup> In addition, two unpublished articles  
49  
50  
51  
52  
53  
54  
55  
56  
57  
58  
59  
60

1  
2  
3 399 from Canada<sup>111</sup> and the UK<sup>98</sup> focusing on breast and lung cancers, respectively, were identified.  
4  
5 400 These were the Alberta Health Services Diagnostic Assessment Pathway and the Somerset  
6  
7 401 Integrated Lung Cancer Pathway. While the Canadian pathway was found to be effective, the  
8  
9  
10 402 pathway from the United Kingdom was not effective.  
11  
12  
13

#### 14 404 ***Support for primary care providers***

15  
16  
17 405 There were four publications on support for primary care providers (PCP), all from the  
18  
19 406 UK.<sup>27,31,48,97</sup> Two were focused on multiple cancer types, and one each focused on  
20  
21 407 gastrointestinal and brain cancers. The publications were on adult patient populations with one  
22  
23 408 being also involving paediatric patients. The focus and metrics for assessment of the  
24  
25 409 effectiveness of the support packages (all educational and informational) varied across the  
26  
27  
28 410 publications. None of the support packages was found to be effective, with the identified  
29  
30 411 common theme being a lack of awareness of referral guidelines and associated knowledge by  
31  
32 412 GPs. These ineffective support packages were the use of the Kernick and NICE guidelines as  
33  
34 413 evidence-based support to assist primary care physicians in identifying patients most at risk of  
35  
36 414 having a brain tumour, but also on the fastest route to achieve diagnosis (example, direct access  
37  
38 415 imaging versus urgent secondary care referral) in Scotland, the UK,<sup>97</sup> the use of the national  
39  
40 416 cancer waiting times monitoring dataset for system performance assessment by primary care  
41  
42 417 physicians in England, the UK,<sup>27</sup> and the use of safety netting by primary care physicians in  
43  
44 418 Oxfordshire, UK to ensure that patients are monitored until their symptoms or signs are  
45  
46 419 explained, and to guard against delays in diagnosis.<sup>31</sup>  
47  
48  
49  
50  
51  
52

#### 53 421 ***Target or benchmark for wait times***

1  
2  
3 422 There were eight published articles related to targets or benchmarks for wait  
4  
5 423 times.<sup>15,42,43,69,73,81,88,96</sup> Three of these articles were from the UK,<sup>69,73,81</sup> two articles from  
6  
7 424 Australia,<sup>42,88</sup> and one article each from China,<sup>43</sup> Sweden,<sup>96</sup> and New Zealand<sup>15</sup>. These  
8  
9 425 publications were focused on varied cancer types (2 each for multiple, lung and gastrointestinal  
10  
11 426 cancers, and 1 each for prostate and skin cancers), and were on adult patient populations, with  
12  
13 427 one publication involving paediatric patients. The focus and metrics for assessment of the  
14  
15 428 effectiveness of the target or benchmarks varied across the publications, and all but two  
16  
17 429 targets/benchmarks<sup>15,88</sup> were found to be effective. The effective targets or benchmarks were the  
18  
19 430 28-day faster diagnosis standard in the National Health Service England, UK, defined as the time  
20  
21 431 within which the patient is informed whether they do or do not have cancer,<sup>73</sup> the fast-track  
22  
23 432 diagnostic workup for men with suspected prostate cancer at the Urology Department at Orebro  
24  
25 433 University Hospital in Sweden, which entailed targeting the shortest possible waiting-time for a  
26  
27 434 diagnostic workup process,<sup>96</sup> and the optimal timeframes for referral and diagnosis of lung lesion  
28  
29 435 at Latrobe Regional Hospital in Victoria, Australia established by the National Cancer Expert  
30  
31 436 Reference Group as part of the optimal care pathway for people with lung cancer.<sup>42</sup> The  
32  
33 437 ineffective targets or benchmarks was the New Zealand Ministry of Health's "faster cancer  
34  
35 438 treatment" standards of service provision for melanoma patients, with a target of  
36  
37 439 histopathological diagnosis of melanoma reported within five working days in 80% of cases, and  
38  
39 440 all cases reported in 10 working days.<sup>15</sup> In addition, two unpublished articles from Canada<sup>105</sup> and  
40  
41 441 the UK<sup>107</sup> focusing on multiple cancers were identified, and these were the "2-week wait"  
42  
43 442 benchmark in the UK (already discussed under rapid referral pathways) and the Canadian Breast  
44  
45 443 Cancer Screening Network targets for diagnostic intervals:  $\geq 90\%$  of abnormal screens to be  
46  
47  
48  
49  
50  
51  
52  
53  
54  
55  
56  
57  
58  
59  
60

1  
2  
3 444 resolved within 5 weeks if no biopsy is required and  $\geq 90\%$  within 7 weeks if a tissue biopsy is  
4  
5 445 required.

6  
7  
8 446

9  
10 447 ***Innovative interventions to enhanced care in cancer pre-diagnosis phase***

11  
12 448 This review identified 17 published articles related to technological interventions for enhanced  
13  
14 449 care in the pre-diagnosis phase of cancer.<sup>16,21,22,29,37,38,51,57,58,62,65,66,79,82,87,89,91</sup> Ten of these articles  
15  
16 450 were from the UK,<sup>22,29,37,38,51,57,62,65,66,91</sup> two articles were from New Zealand,<sup>79,82</sup> and one article  
17  
18 451 each was from Denmark,<sup>89</sup> Netherlands,<sup>21</sup> Italy,<sup>16</sup> India,<sup>87</sup> and Spain.<sup>58</sup> These publications  
19  
20 452 focused on varied cancer types in adult patient populations, with two also involving paediatric  
21  
22 453 patients. The interventions had little patient input in their design, development, or  
23  
24 454 implementation. The focus and metrics for assessment of the effectiveness of the interventions  
25  
26 455 varied across the publications. The main identified interventions were the use of teledermatology  
27  
28 456 in skin cancer diagnosis. This involved the taking of images, including dermoscopy by GPs and  
29  
30 457 sending them for evaluation to specialized dermatologists.<sup>38,62,79,89</sup> The process is embedded in  
31  
32 458 an e-referral system developed in Auckland, New Zealand for suspected skin malignancy,<sup>82</sup> and  
33  
34 459 included teledermatology images triaged as confirmed, likely or suspected melanoma, the use of  
35  
36 460 a web-based referral tool for head and neck cancers at two different hospitals in Birmingham,  
37  
38 461 West Midlands, and Wexham, Berkshire, UK.<sup>51</sup> There was also the use of the Digitally  
39  
40 462 Assembled Referral Toolkit (DART) for 2-week referral, accessible via a cloud-based template,  
41  
42 463 which contained new referral forms native to GP clinical systems in the UK.<sup>29</sup> Additionally,  
43  
44 464 there was the use of an electronic straight-to-test pathway at a large tertiary referral hospital in  
45  
46 465 England, UK to remove hospital-based triage from suspected colorectal cancer pathways; this  
47  
48  
49  
50  
51  
52  
53  
54 466 allows GPs to book tests supported by a decision aid based on the NICE guidance, thus,

1  
2  
3 467 eliminating the need for a standard referral form or triage process.<sup>65</sup> Further, there was the use of  
4  
5 468 electronic clinical decision support for melanoma in four general practices in the Southeast of  
6  
7 469 England, UK, which involved the use of an electronic-based 7-point checklist to assess  
8  
9  
10 470 pigmented lesions,<sup>66</sup> the use of machine learning algorithms in Newcastle, UK to classify  
11  
12 471 patients referred on the 2-week wait pathway for suspected head and neck cancer into different  
13  
14 472 diagnostic groups, albeit very broad ones: cancer and non-cancer,<sup>57</sup> the use of nurse-led  
15  
16 473 assessments to evaluate certain groups of patients suspected to have bowel cancer in England,  
17  
18 474 the UK,<sup>22</sup> and the use of varied smartphone-based skin and oral self-monitoring and screening  
19  
20 475 applications, in England, UK<sup>91</sup> and in the India,<sup>87</sup> respectively. In addition, two unpublished  
21  
22 476 articles from the UK were identified.<sup>106,110</sup> These were for a cancer decision support tool  
23  
24 477 (computer-based programs integrated into a GP's usual patient management system) in  
25  
26 478 Gateshead, London, and a clinical web portal (CWP) electronic system in Manchester, England,  
27  
28 479 with the fundamental part of the CWP being that local clinicians had to take personal  
29  
30  
31 480 responsibility for data input.  
32  
33  
34  
35

481

### 482 *Performance metrics to measure improvements in suspicion to diagnosis phase*

36  
37  
38 483 Varied performance metrics were identified by this review. The main metrics are summarized  
39  
40 484 according to intervention type (**Appendix 9**). While performance metrics appear to be mainly  
41  
42 485 intervention-dependent, time from presentation in primary care to diagnosis and from referral  
43  
44 486 from primary care to specialist consultation, appear to be the most consistent metrics used for  
45  
46 487 evaluation. Performance metrics to measure patients' experience mainly centered on patients'  
47  
48 488 satisfaction and quality of life.  
49  
50  
51  
52  
53

489

1  
2  
3 490 *Specific considerations for underserved populations*  
4

5 491 Four published articles focused on issues related specifically to underserved populations, with all  
6  
7 492 focused on remote/rural populations.<sup>18,30,60,88</sup> These publications were from the UK,<sup>60</sup>  
9  
10 493 Australia,<sup>30,88</sup> and Mexico.<sup>18</sup> A fifth publication only used the patients' area of residence as part  
11  
12 494 of their model.<sup>95</sup> All of the publications were on multiple cancer types and adult populations,  
13  
14 495 although one included a paediatric population. The specific considerations for underserved  
15  
16 496 populations and the evidence regarding them included a publication from Scotland, the UK, a  
17  
18 497 national audit of cancer diagnosis in Scottish and English general practices, exploring and  
19  
20 498 comparing patient characteristics, diagnostic intervals, and routes to diagnosis,<sup>60</sup> the publication  
21  
22 499 from New South Wales, Australia on a study that examined geographic variations in time  
23  
24 500 intervals leading up to treatment for head and neck cancer, with assessment of differences based  
25  
26 501 on remoteness of residence (regional/remote or metropolitan) at two tertiary referral centres,<sup>88</sup> a  
27  
28 502 publication from Mexico City, Mexico on evaluation of a patient navigation program to reduce  
29  
30 503 referral time to cancer centers for underserved patients with a suspicion or diagnosis of cancer at  
31  
32 504 a public general hospital,<sup>18</sup> and a publication from Western Australia, a cluster-randomized  
33  
34 505 controlled trial of a complex intervention to reduce time to diagnosis in rural cancer patients with  
35  
36 506 the aim of measuring the effect of community-based symptom awareness and general practice-  
37  
38 507 based educational interventions on the time to diagnosis in rural patients presenting with breast,  
39  
40 508 prostate, colorectal or lung cancer.<sup>30</sup>  
41  
42  
43  
44  
45  
46  
47  
48  
49  
50  
51  
52  
53  
54  
55  
56  
57  
58  
59  
60



## 510 **Discussion**

511 This scoping review of 88 published and 16 unpublished documents from January 2017 to  
512 January 2021 summarizes the evidence on current interventions focused on improving accurate  
513 and timely cancer diagnosis among symptomatic individuals. The identified articles were from  
514 varied study designs including case-control (most common), cross-sectional, before-and-after,  
515 and mixed methods studies, and randomized controlled trials. There was little evidence to  
516 suggest that patients were involved in the design, development, or implementation of  
517 interventions to enhanced care in cancer pre-diagnosis phase.

518 The evidence suggests that interventions focused on improving accurate and timely  
519 cancer diagnosis among symptomatic individuals are active topics of research. The UK appears  
520 to be championing this area of research, contributing about half of all identified published  
521 literature and 83% of the identified unpublished literature. Of the specific cancer patient types,  
522 lung cancer patients appear to be the most researched, ranking highest among the patient  
523 populations of published and unpublished literature. Of the studied interventions, rapid referral  
524 pathways and technology for supporting and streamlining the diagnosis process were the two  
525 most reported interventions. Overall, varied national and regional centralized or coordinated  
526 diagnostic services, interventions to enhance diagnostic services, multidisciplinary team  
527 approaches, patient navigation approaches, rapid referral pathways, standardized care pathways,  
528 support for primary care providers, target or benchmarks, technologies to support diagnosis  
529 process, and insights regarding variations between remote/rural and urban populations have been  
530 reported although there were no articles that focused specifically on Indigenous populations.  
531 Many of these intervention types could be adapted to suit different health systems and  
532 jurisdictions around the world.

1  
2  
3 533 The interventions mostly comprised multiple interventions/ changes to the healthcare  
4  
5 534 pathway. As such, the interventions examined varied widely across the studies. This was true  
6  
7  
8 535 even when applied to the same cancer patient populations and in the same jurisdictions/  
9  
10 536 countries, including those where an intervention was part of the standard care pathway. As such,  
11  
12 537 it is difficult, perhaps impossible, to identify one main approach alone that drives an  
13  
14 538 intervention. Methodological approaches also varied significantly with regard to outcome  
15  
16  
17 539 assessment. A common theme among the effective centralized or coordinated diagnostic  
18  
19 540 services, interventions to enhance diagnostic services, patient navigation approaches, and  
20  
21 541 standardized care pathways is multidisciplinary collaboration and the involvement of a nurse  
22  
23 542 navigator.

24  
25  
26 543 The findings from this scoping review compare considerably with those of the previously  
27  
28 544 summarized evidence (prior to the ongoing coronavirus disease 2019 (COVID-19) pandemic) not  
29  
30 545 included in this review.<sup>9</sup> However, while the previous evidence summary identified similar  
31  
32 546 leading interventions to enhance seamless and coordinated cancer care in symptomatic  
33  
34 547 individuals, intervention effectiveness was not summarized to enable comparison with the  
35  
36 548 findings from this current review. As a result, assessment of the potential impact of the COVID-  
37  
38 549 19 pandemic on intervention effectiveness was not possible; despite reports of decline and delays  
39  
40 550 in cancer diagnosis of symptomatic individuals even in jurisdictions that utilize interventions that  
41  
42 551 have been found to be effective from this review.<sup>114,115</sup> A survey by the Canadian Cancer  
43  
44 552 Survivor Network (CCSN) showed that 54% of those surveyed (with about 75% of pre-diagnosis  
45  
46 553 and recently diagnosed patients among them) have had their cancer care appointments cancelled,  
47  
48 554 postponed, or rescheduled because of COVID-19.<sup>116</sup> Further, a modelling study in England, by  
49  
50 555 Maringe and colleagues concluded that substantial increases should be expected in the number of  
51  
52  
53  
54  
55  
56  
57  
58  
59  
60

1  
2  
3 556 avoidable cancer deaths as a result of diagnostic delays due to the COVID-19 pandemic.<sup>117</sup> The  
4  
5 557 conclusions of the available evidence reviews suggest that cancer screening programs and  
6  
7 558 diagnoses in symptomatic individuals, have been clearly interrupted since the onset of the  
8  
9  
10 559 COVID-19 pandemic, with delayed diagnosis and marked increases in the numbers of avoidable  
11  
12 560 cancer deaths.<sup>118,119</sup>

13  
14  
15 561 It was difficult to determine a specific intervention or a stand-alone approach to an  
16  
17 562 intervention from this scoping review. It was also difficult to assess the true effectiveness of  
18  
19 563 many of the interventions, especially considering the differing composite nature of the  
20  
21 564 interventions, the fact that the evidence is mostly from observational studies, and the range of  
22  
23 565 outcome measures used to measure effectiveness. While many of the interventions could be  
24  
25 566 adapted to suit different health systems and jurisdictions, emphasis should be on the context and  
26  
27 567 the strengths and limitations of the individual health system, and a clear evidence-based  
28  
29 568 performance metric for appropriate evaluation of effectiveness of an intervention ought to be  
30  
31 569 determined a priori. Diagnosing cancer faster and more accurately at an earlier stage is a key  
32  
33 570 priority of the 2019-2029 Canadian Strategy for Cancer Control.<sup>120</sup> Over the next 5 years, the  
34  
35 571 Canadian Partnership Against Cancer will leverage findings from this scoping review, as one of  
36  
37 572 several inputs, and partner with Canadian jurisdictions to continue to test innovative models of  
38  
39 573 care that expedite cancer diagnosis, especially for Indigenous and underserved populations.  
40  
41  
42  
43  
44

#### 45 574 46 47 575 **Limitations and merits**

48  
49 576 There are some limitations to this study. The literature search was developed by a knowledge  
50  
51 577 synthesis librarian and peer reviewed by an independent knowledge synthesis librarian using the  
52  
53 578 PRESS checklist. We searched appropriate databases and websites for literature, and adhered to  
54  
55  
56  
57  
58  
59  
60

1  
2  
3 579 known guidelines and standards in the conduct and reporting of the review. Even so, the  
4  
5 580 literature search was limited to evidence from the last 4 years and only evidence from English-  
6  
7 581 language publications and organizational websites. As such, potentially eligible articles could  
8  
9 582 have been missed.

11  
12 583 The eligibility criteria for inclusion were not limited to only comparative studies. This  
13  
14 584 meant that the focus of some of the included studies was not specifically on the assessment of  
15  
16 585 effectiveness of an intervention and therefore, effectiveness may have been underreported for  
17  
18 586 some interventions. Moreover, an intervention's effectiveness assessment was based solely on  
19  
20 587 author-determined outcome, which may or may not have been an appropriate outcome for  
21  
22 588 assessing effectiveness of certain interventions. As such, an intervention that appeared effective  
23  
24 589 in a study may be ineffective in another study depending on the assessed outcome, with no clear  
25  
26 590 reason for such a discrepancy. Furthermore, this review did not assess effectiveness of  
27  
28 591 interventions across cancer patient types and jurisdictions/regions. This would have allowed  
29  
30 592 assessment of any differences in intervention effectiveness by patient type and study jurisdiction.  
31  
32 593 Lastly, and in line with the JBI's guidance for the conduct of scoping reviews, we did not  
33  
34 594 attempt to provide an assessment of the quality of the evidence and, as such, the risk of bias in  
35  
36 595 randomized controlled trials and quality assessment of observational studies, including  
37  
38 596 assessment for important potential biases such as selection, case ascertainment and measurement  
39  
40 597 biases, and potential confounders in studies were not considered in this review; hence, the  
41  
42 598 findings on effectiveness are not conclusive of the performance of the interventions.  
43  
44  
45  
46  
47  
48  
49  
50

51 600 **Conclusions**  
52  
53  
54  
55  
56  
57  
58  
59  
60

1  
2  
3 601 The evidence suggests that interventions focused on improving accurate and timely cancer  
4  
5 602 diagnosis among symptomatic individuals are active topics of research, particularly in lung  
6  
7 603 cancer patient populations, and that the UK is championing this area of research. While the  
8  
9  
10 604 themes of the studied interventions are similar, the interventions differ in many ways within the  
11  
12 605 same intervention group. Multidisciplinary cooperation and involvement of a nurse navigator  
13  
14 606 appeared to be unique features of many of the effective interventions. Canadian and other  
15  
16 607 jurisdictions can leverage these lessons learned to develop and implement strategies adapted to  
17  
18 608 local health system needs to improve the cancer pre-diagnosis phase. Future research should  
19  
20 609 examine the effectiveness of the interventions identified through this review.  
21  
22  
23  
24 610

25  
26 611 **Data availability statement:** No additional data are available.  
27  
28 612

29  
30  
31 613 **Ethics approval:** Not applicable.  
32  
33 614

34  
35 615 **Details of the role of the study sponsors:** The Canadian Partnership Against Cancer (the study  
36  
37 616 commissioner) contributed to specifying the study objectives and questions, and in summarizing  
38  
39 617 the evidence.  
40  
41 618

42  
43  
44 619 **Patient and public involvement:** There was no active engagement of patients and/or members  
45  
46 620 of the public.  
47  
48  
49  
50  
51  
52  
53  
54  
55  
56  
57  
58  
59  
60

621 **References**

- 622 1. GBD Mortality and Causes of Death Collaborators. Global, regional, and national life  
623 expectancy, all-cause mortality, and cause-specific mortality for 249 causes of death,  
624 1980-2015: a systematic analysis for the Global Burden of Disease Study 2015. *Lancet*.  
625 2016;388(10053):1459-1544.
- 626 2. Sung H, Ferlay J, Siegel RL, et al. Global cancer statistics 2020: GLOBOCAN estimates  
627 of incidence and mortality worldwide for 36 cancers in 185 countries. *CA Cancer J Clin*.  
628 2021.
- 629 3. The Canadian Cancer Society. Cancer statistics at a glance. The Canadian Cancer  
630 Society. <https://bit.ly/2OjjxOO>. Published 2021. Accessed March 04, 2021.
- 631 4. Smetana K, Lacina L, Szabo P, Dvorankova B, Broz P, Sedo A. Ageing as an Important  
632 Risk Factor for Cancer. *Anticancer Res*. 2016;36(10):5009-5017.
- 633 5. World Health Organization. Fact Sheets: Cancer. The World Health Organization.  
634 <https://bit.ly/3c0xaL4>. Published 2018. Accessed March 04, 2021.
- 635 6. Peters MDJ, Marnie C, Tricco AC, et al. Updated methodological guidance for the  
636 conduct of scoping reviews. *JBIM Evid Synth*. 2020;18(10):2119-2126.
- 637 7. Tricco AC, Lillie E, Zarin W, et al. PRISMA Extension for Scoping Reviews (PRISMA-  
638 ScR): Checklist and Explanation. *Ann Intern Med*. 2018;169(7):467-473.
- 639 8. McGowan J, Sampson M, Salzwedel DM, Cogo E, Foerster V, Lefebvre C. PRESS Peer  
640 Review of Electronic Search Strategies: 2015 Guideline Statement. *J Clin Epidemiol*.  
641 2016;75:40-46.
- 642 9. Canadian Partnership Against Cancer. *Leading Practices to Create a Seamless Patient  
643 Experience for the Pre-diagnosis Phase of Care: An Environmental Scan*. Toronto,  
644 Canada: Canadian Partnership Against Cancer;2018.
- 645 10. Agnarsdottir M, Paaren H, Vassilaki I. The impact of standardized care pathway on  
646 reporting time for invasive melanoma - results from one pathology department in  
647 Sweden. *Ups J Med Sci*. 2019;124:260-264.
- 648 11. Almuammar A. Primary health care factors associated with late presentation of cancer in  
649 Saudi Arabia. *Journal of Radiotherapy in Practice*. 2020;19:71-75.

- 1  
2  
3 650 12. Alonso-Abreu I, Alarcon-Fernandez O, Gimeno-Garcia AZ, et al. Early Colonoscopy  
4 651 Improves the Outcome of Patients With Symptomatic Colorectal Cancer. *Dis Colon*  
5 652 *Rectum*. 2017;60:837-844.
- 6  
7  
8 653 13. Antel K, Louw VJ, Maartens G, Oosthuizen J, Verburgh E. Diagnosing lymphoma in the  
9 654 shadow of an epidemic: lessons learned from the diagnostic challenges posed by the dual  
10 655 tuberculosis and HIV epidemics. *Leuk Lymphoma*. 2020:1-5.
- 11  
12  
13 656 14. Arhi CS, Burns EM, Bottle A, et al. Delays in referral from primary care worsen survival  
14 657 for patients with colorectal cancer: a retrospective cohort study. *Br J Gen Pract*.  
15 658 2020;70:e463-e471.
- 16  
17  
18 659 15. Brian T, Adams B, Jameson M. Cutaneous melanoma: an audit of management  
19 660 timeliness against New Zealand guidelines. *N Z Med J*. 2017;130:54-61.
- 20  
21  
22 661 16. Cazzaniga S, Castelli E, Di Landro A, et al. Mobile teledermatology for melanoma  
23 662 detection: Assessment of the validity in the framework of a population-based skin cancer  
24 663 awareness campaign in northern Italy. *J Am Acad Dermatol*. 2019;81:257-260.
- 25  
26  
27 664 17. Chapman C, Thomas C, Morling J, et al. Early clinical outcomes of a rapid colorectal  
28 665 cancer diagnosis pathway using faecal immunochemical testing in Nottingham.  
29 666 *Colorectal Dis*. 2020;22:679-688.
- 30  
31  
32 667 18. Chavarri-Guerra Y, Soto-Perez-de-Celis E, Ramos-Lopez W, et al. Patient Navigation to  
33 668 Enhance Access to Care for Underserved Patients with a Suspicion or Diagnosis of  
34 669 Cancer. *Oncologist*. 2019;24:1195-1200.
- 35  
36  
37 670 19. Chng M, Coulter IC, Surash S. Impact of the updated NICE referral pathway for patients  
38 671 with suspected brain cancer on a neuroscience service. *Br J Neurosurg*. 2020:1-5.
- 39  
40  
41 672 20. Christensen HM, Huniche L. Patient perspectives and experience on the diagnostic  
42 673 pathway of lung cancer: A qualitative study. *SAGE Open Med*.  
43 674 2020;8:2050312120918996.
- 44  
45  
46 675 21. Chung Y, van der Sande AAJ, de Roos KP, et al. Poor agreement between the automated  
47 676 risk assessment of a smartphone application for skin cancer detection and the rating by  
48 677 dermatologists. *J Eur Acad Dermatol Venereol*. 2020;34:274-278.
- 49  
50  
51 678 22. Cock K. Nurse-led service development for suspected bowel cancer. *Cancer Nursing*  
52 679 *Practice*. 2017;16:28-31.
- 53  
54  
55  
56  
57  
58  
59  
60



- 1  
2  
3 680 23. Common JL, Mariathas HH, Parsons K, et al. Reducing Wait Time for Lung Cancer  
4 681 Diagnosis and Treatment: Impact of a Multidisciplinary, Centralized Referral Program.  
5 682 *Can Assoc Radiol J.* 2018;69:322-327.  
6  
7  
8 683 24. Cotton C, Mahut C, Blyth J, et al. Using Lean to Improve Wait Time Performance in  
9 684 Diagnostic Assessment for Lung Cancer. *Healthc Q.* 2020;22:59-63.  
10  
11 685 25. Creak A. Prospective Cohort of Referrals to a Cancer of Unknown Primary Clinic,  
12 686 including Direct Access from Primary Care. *Clin Oncol (R Coll Radiol).* 2020;32:e87-  
13 687 e92.  
14  
15  
16 688 26. Dahl TL, Vedsted P, Jensen H. The effect of standardised cancer pathways on Danish  
17 689 cancer patients' dissatisfaction with waiting time. *Dan Med J.* 2017;64.  
18  
19 690 27. Di Girolamo C, Walters S, Gildea C, Benitez Majano S, Rachet B, Morris M. Can we  
20 691 assess Cancer Waiting Time targets with cancer survival? A population-based study of  
21 692 individually linked data from the National Cancer Waiting Times monitoring dataset in  
22 693 England, 2009-2013. *PLoS ONE.* 2018;13:e0201288.  
23  
24  
25 694 28. Drudge-Coates L, Khati V, Ballesteros R, et al. A nurse practitioner model for the  
26 695 assessment of suspected prostate cancer referrals is safe, cost and time efficient.  
27 696 *Ecancermedicalscience.* 2019;13:994.  
28  
29 697 29. Eastham R, Duffy S, Foster C, Beaumont A. DART: a new look at the 2-week wait  
30 698 suspected cancer referral process. *Br J Gen Pract.* 2017;67:560.  
31  
32 699 30. Emery JD, Gray V, Walter FM, et al. The Improving Rural Cancer Outcomes Trial: a  
33 700 cluster-randomised controlled trial of a complex intervention to reduce time to diagnosis  
34 701 in rural cancer patients in Western Australia. *Br J Cancer.* 2017;117:1459-1469.  
35  
36 702 31. Evans J, Ziebland S, MacArtney JI, Bankhead CR, Rose PW, Nicholson BD. GPs'  
37 703 understanding and practice of safety netting for potential cancer presentations: a  
38 704 qualitative study in primary care. *Br J Gen Pract.* 2018;68:e505-e511.  
39  
40 705 32. Evison M, Hewitt K, Lyons J, et al. Implementation and outcomes of the RAPID  
41 706 programme: Addressing the front end of the lung cancer pathway in Manchester. *Clin*  
42 707 *Med.* 2020;20:401-405.  
43  
44 708 33. Ezer N, Navasakulpong A, Schwartzman K, Ofiara L, Gonzalez AV. Impact of rapid  
45 709 investigation clinic on timeliness of lung cancer diagnosis and treatment. *BMC polm.*  
46 710 2017;17:178.  
47  
48  
49  
50  
51  
52  
53  
54  
55  
56  
57  
58  
59  
60



- 1  
2  
3 711 34. Fallon M, Adil MT, Ahmed K, Whitelaw D, Rashid F, Jambulingam P. Impact of 'two-  
4 712 week wait' referral pathway on the diagnosis, treatment and survival in upper and lower  
5 713 gastrointestinal cancers. *Postgrad Med J.* 2019;95:470-475.
- 6  
7  
8 714 35. Gardner D, Nixon IJ. An analysis of waiting times in patients with thyroid cancer. *Surg.*  
9 715 2020;06:06.
- 10  
11  
12 716 36. Hennessy M, Ryan D, Clarke S, et al. Optimal Timing of CT Scanning in the Rapid  
13 717 Access Lung Cancer Clinic. *Ir Med J.* 2020;113:121.
- 14  
15 718 37. Hirst Y, Lim AWW. Acceptability of text messages for safety netting patients with low-  
16 719 risk cancer symptoms: a qualitative study. *Br J Gen Pract.* 2018;68:e333-e341.
- 17  
18  
19 720 38. Hunt WTN, Ali L, Marder H, Sansom JE, de Berker DAR. A service evaluation between  
20 721 2-week wait (2WW) skin cancer referrals via teledermatology and the standard face-to-  
21 722 face pathway at a teaching hospital. *Clin Exp Dermatol.* 2020;45:473-476.
- 22  
23  
24 723 39. Iachina M, Jakobsen E, Fallesen AK, Green A. Transfer between hospitals as a predictor  
25 724 of delay in diagnosis and treatment of patients with Non-Small Cell Lung Cancer - a  
26 725 register based cohort-study. *BMC Health Serv Res.* 2017;17:267.
- 27  
28  
29 726 40. Jefferson L, Atkin K, Sheridan R, et al. Non-attendance at urgent referral appointments  
30 727 for suspected cancer: a qualitative study to gain understanding from patients and GPs. *Br*  
31 728 *J Gen Pract.* 2019;18:18.
- 32  
33  
34 729 41. Jensen H, Topping ML, Vedsted P. Prognostic consequences of implementing cancer  
35 730 patient pathways in Denmark: a comparative cohort study of symptomatic cancer patients  
36 731 in primary care. *BMC Cancer.* 2017;17:627.
- 37  
38  
39 732 42. Jeyakumar HS, Wright A. Improving regional lung cancer optimal care pathway  
40 733 compliance through a rapid-access respiratory clinic. *Intern Med J.* 2020;50:805-810.
- 41  
42  
43 734 43. Jiang T, Ren S, Li X, Su C, Zhou C, O'Brien M. The changing diagnostic pathway for  
44 735 lung cancer patients in Shanghai, China. *Eur J Cancer.* 2017;84:168-172.
- 45  
46  
47 736 44. Jiang L, Gilbert J, Langlely H, Moineddin R, Groome PA. Is being diagnosed at a  
48 737 dedicated breast assessment unit associated with a reduction in the time to diagnosis for  
49 738 symptomatic breast cancer patients? *Eur J Cancer Care (Engl).* 2018;27:e12864.
- 50  
51  
52 739 45. Jones JA, Catton J, Howard G, et al. Impact of straight to test pathways on time to  
53 740 diagnosis in oesophageal and gastric cancer. *BMJ open qual.* 2018;7:e000328.
- 54  
55  
56  
57  
58  
59  
60

- 1  
2  
3 741 46. Joyce K, Zermanos T, Badrinath P. Factors associated with variation in emergency  
4 742 diagnoses of cancer at general practice level in England. *J Public Health (Oxf)*.  
5 743 2020;05:05.  
6  
7  
8 744 47. Kassirian S, Dzioba A, Hamel S, et al. Delay in diagnosis of patients with head-and-neck  
9 745 cancer in Canada: impact of patient and provider delay. *Current Oncology*.  
10 746 2020;27:e467-e477.  
11  
12  
13 747 48. Kidney E, Greenfield S, Berkman L, et al. Cancer suspicion in general practice, urgent  
14 748 referral, and time to diagnosis: a population-based GP survey nested within a feasibility  
15 749 study using information technology to flag-up patients with symptoms of colorectal  
16 750 cancer. *BJGP open*. 2017;1:bjgpopen17X101109.  
17  
18  
19 751 49. Laerum D, Brustugun OT, Gallefoss F, Falk R, Strand T-E, Fjellbirkeland L. Reduced  
20 752 delays in diagnostic pathways for non-small cell lung cancer after local and National  
21 753 initiatives. *Cancer Treat Res Commun*. 2020;23:100168.  
22  
23  
24 754 50. Largey G, Briggs P, Davies H, et al. The Victorian Lung Cancer Service Redesign  
25 755 Project: Impacts of a Quality Improvement collaborative on timeliness and management  
26 756 in lung cancer. *Intern Med J*. 2020;08:08.  
27  
28  
29 757 51. Lau K, Wilkinson J, Moorthy R. A web-based prediction score for head and neck cancer  
30 758 referrals. *Clin Otolaryngol*. 2018;15:15.  
31  
32  
33 759 52. Laudicella M, Walsh B, Burns E, Li Donni P, Smith PC. What is the impact of rerouting  
34 760 a cancer diagnosis from emergency presentation to GP referral on resource use and  
35 761 survival? Evidence from a population-based study. *BMC Cancer*. 2018;18:394.  
36  
37  
38 762 53. McCutchan G, Smits S, Ironmonger L, et al. Evaluation of a national lung cancer  
39 763 symptom awareness campaign in Wales. *Br J Cancer*. 2020;122:491-497.  
40  
41  
42 764 54. McKevitt EC, Dingee CK, Leung S-P, et al. Reduced Time to Breast Cancer Diagnosis  
43 765 with Coordination of Radiological and Clinical Care. *Cureus*. 2017;9:e1919.  
44  
45  
46 766 55. McKevitt E, Dingee C, Warburton R, et al. Patient navigation reduces time to care for  
47 767 patients with breast symptoms and abnormal screening mammograms. *Am J Surg*.  
48 768 2018;215:805-811.  
49  
50  
51 769 56. Moodley J, Cairncross L, Naiker T, Constant D. From symptom discovery to treatment -  
52 770 women's pathways to breast cancer care: a cross-sectional study. *BMC Cancer*.  
53 771 2018;18:312.  
54  
55  
56  
57  
58  
59  
60

- 1  
2  
3 772 57. Moor JW, Paleri V, Edwards J. Patient classification of two-week wait referrals for  
4 773 suspected head and neck cancer: a machine learning approach. *J Laryngol Otol.* 2019;1-  
5 774 4.  
6  
7  
8 775 58. Moreno-Ramirez D, Raya-Maldonado J, Morales-Conde M, et al. Increasing Frequency  
9 776 of Seborrheic Keratosis Diagnoses as a Favorable Consequence of Teledermatology-  
10 777 Based Skin Cancer Screening: A Cross-sectional Study of 34,553 Patients. *Am J Clin*  
11 778 *Dermatol.* 2017;18:681-685.  
12  
13  
14  
15 779 59. Mullin MLL, Tran A, Golemic B, et al. Improving Timeliness of Lung Cancer  
16 780 Diagnosis and Staging Investigations Through Implementation of Standardized Triage  
17 781 Pathways. *JCO Oncol Pract.* 2020;16:e1202-e1208.  
18  
19  
20 782 60. Murchie P, Adam R, McNair E, et al. Cancer diagnosis in Scottish primary care: Results  
21 783 from the National Cancer Diagnosis Audit. *Eur J Cancer Care (Engl).* 2020;29:e13234.  
22  
23  
24 784 61. Neal RD, Barham A, Bongard E, et al. Immediate chest X-ray for patients at risk of lung  
25 785 cancer presenting in primary care: randomised controlled feasibility trial. *Br J Cancer.*  
26 786 2017;116:293-302.  
27  
28  
29 787 62. Nicholson P, Macedo C, Fuller C, Thomas L. Patient satisfaction with a new skin cancer  
30 788 teledermatology service. *Clin Exp Dermatol.* 2020;45:691-698.  
31  
32  
33 789 63. Nilbert M, Blackberg M, Ceberg J, Hagberg O, Stenhoff R, Liedberg F. Diagnostic  
34 790 pathway efficacy for urinary tract cancer: population-based outcome of standardized  
35 791 evaluation for macroscopic haematuria. *Scand J Urol.* 2018;52:237-243.  
36  
37  
38 792 64. Nixon S, Bezverbnaya K, Maganti M, et al. Evaluation of Lymphadenopathy and  
39 793 Suspected Lymphoma in a Lymphoma Rapid Diagnosis Clinic. *JCO Oncol Pract.*  
40 794 2020;16:e29-e36.  
41  
42  
43 795 65. Orchard P, Arvind N, Wint A, et al. Removing hospital-based triage from suspected  
44 796 colorectal cancer pathways: the impact and learning from a primary care-led electronic  
45 797 straight-to-test pathway. *BMJ Qual Saf.* 2020;11:11.  
46  
47  
48 798 66. Pannebakker MM, Mills K, Johnson M, Emery JD, Walter FM. Understanding  
49 799 implementation and usefulness of electronic clinical decision support (eCDS) for  
50 800 melanoma in English primary care: a qualitative investigation. *BJGP open.*  
51 801 2019;3:bjgpopen18X101635.  
52  
53  
54  
55  
56  
57  
58  
59  
60

- 1  
2  
3 802 67. Pearson C, Poirier V, Fitzgerald K, Rubin G, Hamilton W. Cross-sectional study using  
4 803 primary care and cancer registration data to investigate patients with cancer presenting  
5 804 with non-specific symptoms. *BMJ Open*. 2020;10:e033008.  
6  
7  
8 805 68. Phillips WW, Hofferberth SC, Armitage J, et al. PD01.19 Lung Cancer Strategist  
9 806 Program: a Novel Care Delivery Model to Improve Timeliness of Diagnosis and  
10 807 Treatment. *Journal of Thoracic Oncology*. 2019;14:S1140-S1140.  
11  
12  
13 808 69. Piano M, Black G, Amelung D, Power E, Whitaker KL. Exploring public attitudes  
14 809 towards the new Faster Diagnosis Standard for cancer: a focus group study with the UK  
15 810 public. *Br J Gen Pract*. 2019;69:e413-e421.  
16  
17  
18 811 70. Price S, Spencer A, Zhang X, et al. Trends in time to cancer diagnosis around the period  
19 812 of changing national guidance on referral of symptomatic patients: A serial cross-  
20 813 sectional study using UK electronic healthcare records from 2006-17. *Cancer epidemiol*.  
21 814 2020;69:101805.  
22  
23  
24 815 71. Rankin NM, York S, Stone E, et al. Pathways to Lung Cancer Diagnosis: A Qualitative  
25 816 Study of Patients and General Practitioners about Diagnostic and Pretreatment Intervals.  
26 817 *Ann Am Thorac Soc*. 2017;14:742-753.  
27  
28  
29 818 72. Round T, Gildea C, Ashworth M, Moller H. Association between use of urgent suspected  
30 819 cancer referral and mortality and stage at diagnosis: a 5-year national cohort study. *Br J*  
31 820 *Gen Pract*. 2020;70:e389-e398.  
32  
33  
34 821 73. Sagar A, Mai DVC, Divya GS, et al. A colorectal straight-to-test cancer pathway with  
35 822 GP-guided triage improves attainment of the 28-day diagnosis target and increases  
36 823 outpatient clinic capacity. *Colorectal Dis*. 2020;19:19.  
37  
38  
39 824 74. Sandager M, Jensen H, Lipczak H, Sperling CD, Vedsted P. Cancer patients' experiences  
40 825 with urgent referrals to cancer patient pathways. *Eur J Cancer Care (Engl)*.  
41 826 2019;28:e12927.  
42  
43  
44 827 75. Sardi A, Orozco-Urdaneta M, Velez-Mejia C, et al. Overcoming Barriers in the  
45 828 Implementation of Programs for Breast and Cervical Cancers in Cali, Colombia: A Pilot  
46 829 Model. *J*. 2019;5:1-9.  
47  
48  
49 830 76. Scott SE, Oakley R, Moller H, Warburton F. Tracking cancer occurrence in the 5 years  
50 831 after referral for suspected head and neck cancer. *Oral Oncol*. 2020;109:104955.  
51  
52  
53  
54  
55  
56  
57  
58  
59  
60

- 1  
2  
3 832 77. Setyowibowo H, Hunfeld JAM, Iskandarsyah A, et al. A self-help intervention for  
4 833 reducing time to diagnosis in Indonesian women with breast cancer symptoms.  
5 834 *Psychooncology*. 2020;29:696-702.
- 6  
7  
8 835 78. Skevington SM, Long H, Gartland N. Does quality of life feedback promote seeking help  
9 836 for undiagnosed cancer? *Qual Life Res*. 2020;29:1609-1619.
- 10  
11  
12 837 79. Snoswell CL, Caffery LJ, Whitty JA, Soyer HP, Gordon LG. Cost-effectiveness of Skin  
13 838 Cancer Referral and Consultation Using Teledermoscopy in Australia. *JAMA Dermatol*.  
14 839 2018;154:694-700.
- 15  
16  
17 840 80. Stenman E, Palmer K, Ryden S, et al. Diagnostic spectrum and time intervals in Sweden's  
18 841 first diagnostic center for patients with nonspecific symptoms of cancer. *Acta Oncol*.  
19 842 2019;58:296-305.
- 20  
21  
22 843 81. Stevenson-Hornby V. A rapid-access diagnostic pathway in suspected pancreatic cancer.  
23 844 *Nursing Times*. 2018;114:13-11.
- 24  
25  
26 845 82. Sunderland M, Teague R, Gale K, Rademaker M, Oakley A, Martin RCW. E-referrals  
27 846 and teledermatology grading for melanoma: a successful model of care. *Australas J*  
28 847 *Dermatol*. 2020;61:147-151.
- 29  
30  
31 848 83. Tafuri A, Ashrafi AN, Palmer S, et al. One-Stop MRI and MRI/transrectal ultrasound  
32 849 fusion-guided biopsy: an expedited pathway for prostate cancer diagnosis. *World J Urol*.  
33 850 2020;38:949-956.
- 34  
35  
36 851 84. Talwar C, McClune A, Kelly D, Lowe D, Rogers SN. Two-week rule: suspected head  
37 852 and neck cancer referrals from a general medical practice perspective. *Br J Oral*  
38 853 *Maxillofac Surg*. 2020;58:981-985.
- 39  
40  
41 854 85. Thalanayar Muthukrishnan P, Ratnam M, Nguyen M-T, et al. Pre-diagnosis  
42 855 Multidisciplinary Tumor Board and Time to Staging in Lung Cancer: The Case Western  
43 856 MetroHealth Experience. *Cureus*. 2020;12:e6595.
- 44  
45  
46 857 86. Thanapal MR, Thin N, Alagaratnam S, et al. Straight-to-test colonoscopy: Has it  
47 858 improved the detection of colorectal cancer? A 7- year review. *Surg*. 2020;26:26.
- 48  
49  
50 859 87. Uthoff RD, Song B, Sunny S, et al. Point-of-care, smartphone-based, dual-modality,  
51 860 dual-view, oral cancer screening device with neural network classification for low-  
52 861 resource communities. *PLoS ONE*. 2018;13:e0207493.

- 1  
2  
3 862 88. Venchiarutti RL, Clark JR, Palme CE, et al. Influence of remoteness of residence on  
4 863 timeliness of diagnosis and treatment of oral cavity and oropharynx cancer: A  
5 864 retrospective cohort study. *J Med Imaging Radiat Oncol*. 2020;64:261-270.  
6  
7 865 89. Vestergaard T, Prasad SC, Schuster A, et al. Introducing teledermoscopy of possible skin  
8 866 cancers in general practice in Southern Denmark. *Fam Pract*. 2020;37:513-518.  
9  
10 867 90. Vijayakumar B, Shahidi M, Thakkar R, Prasad A. A novel 2-week wait lung cancer  
11 868 pathway starting with a telephone consultation, with patient satisfaction survey results.  
12 869 *Future Healthc J*. 2020;7:s15.  
13  
14 870 91. Walter FM, Pannebakker MM, Barclay ME, et al. Effect of a Skin Self-monitoring  
15 871 Smartphone Application on Time to Physician Consultation Among Patients With  
16 872 Possible Melanoma: A Phase 2 Randomized Clinical Trial. *JAMA netw*. 2020;3:e200001.  
17  
18 873 92. Whitley EM, Raich PC, Dudley DJ, et al. Relation of comorbidities and patient  
19 874 navigation with the time to diagnostic resolution after abnormal cancer screening.  
20 875 *Cancer*. 2017;123:312-318.  
21  
22 876 93. Williams S, Davies P, Johnson B, Iles S. A fast track clinic improves diagnosis and  
23 877 treatment times for those investigated for lung cancer in Northland District Health Board.  
24 878 *N Z Med J*. 2018;131:29-37.  
25  
26 879 94. Williams VL, Narasimhamurthy M, Rodriguez O, et al. Dermatology-Driven Quality  
27 880 Improvement Interventions to Decrease Diagnostic Delays for Kaposi Sarcoma in  
28 881 Botswana. *J*. 2019;5:1-7.  
29  
30 882 95. Yeşiler Fİ, Çimen F, Atıkan Ş. Factors affecting delay in diagnosis and treatment of  
31 883 lung cancer. *Journal of Surgery & Medicine (JOSAM)*. 2020;4:720-724.  
32  
33 884 96. Zhu J, Chen R, Davidsson S, et al. Psychological and physiological impacts of a fast-  
34 885 track diagnostic workup for men with suspected prostate cancer: Preliminary report from  
35 886 a randomized clinical trial. *Cancer Commun (Lond)*. 2020;40:239-242.  
36  
37 887 97. Zienius K, Chak-Lam I, Park J, et al. Direct access CT for suspicion of brain tumour: an  
38 888 analysis of referral pathways in a population-based patient group. *BMC Fam Pract*.  
39 889 2019;20:118.  
40  
41 890 98. ACE Programme. Somerset Integrated Lung Cancer Pathway. Phases One and Two Final  
42 891 Report Final Report. In: Group SCC, ed. UK: NHS; 2017:1-12.



- 1  
2  
3 892 99. Improving diagnostic pathways for patients with suspected colorectal cancer. In:  
4 893 Accelerate CEP, ed. UK: NHS England, Cancer Research UK and Macmillan Cancer  
5 894 Support; 2017:39.  
6  
7  
8 895 100. Improving diagnostic pathways for patients with vague symptoms. In: Accelerate CEP,  
9 896 ed. UK2017:49.  
10  
11 897 101. Pharmacy training for early diagnosis of cancer. In: Accelerate CEP, ed. UK: NHS  
12 898 England, Cancer Research UK and Macmillan Cancer Support; 2017:27.  
13  
14 899 102. Streamlining the lung diagnostic pathway (A87). In: Trust CCCGwS, Sussex Healthcare  
15 900 NHS, eds. UK: NHS; 2017:14.  
16  
17 901 103. Streamlining the lung diagnostic pathway (A14). In: Trust H, Mid Sussex CCGwB,  
18 902 Sussex University H, eds. UK: NHS; 2017:27.  
19  
20 903 104. Multidisciplinary Diagnostic Centre (MDC) based pathways for patients with non-  
21 904 specific but concerning symptoms. Interim report. In: Accelerate CEP, ed. UK: NHS  
22 905 England, Cancer Research UK and Macmillan Cancer Support; 2018.  
23  
24 906 105. New Brunswick Cancer Network. Cancer System Performance 2019. In. New Brunswick,  
25 907 Canada: Government of New Brunswick; 2020:36.  
26  
27 908 106. Gill B. Improving diagnostic pathways for patients with suspected lung cancer. In:  
28 909 Accelerate CEP, ed. UK: NHS England, Cancer Research UK and Macmillan Cancer  
29 910 Support; 2017.  
30  
31 911 107. Hamilton M, Hodgson O, Dai D, McDonnell P. Waiting Times for Suspected and  
32 912 Diagnosed Cancer Patients. 2017-18 Annual Report. In: Nhs, ed. UK: NHS England;  
33 913 2018:21.  
34  
35 914 108. Robinson S, Fuller E. South Tees Optical Referral Project (STORP). A project summary.  
36 915 In: Accelerate CEP, ed. UK2017:14.  
37  
38 916 109. Robinson S, Fuller E. A Lung Health Service – Doncaster pharmacy direct referral for  
39 917 chest x-ray. A project summary. In: Accelerate CEP, ed. UK: NHS England, Cancer  
40 918 Research UK and Macmillan Cancer Support; 2017:12.  
41  
42 919 110. Robinson S, Poirier V, Watson S. Using Cancer Decision Support Tools to support the  
43 920 early diagnosis of cancer. In: Accelerate CEP, ed. UK: NHS; 2017:39.  
44  
45 921 111. Services AH. Cancer SCN Quarterly Update. July to September 2018. In. Canada:  
46 922 Alberta Health Services; 2018.  
47  
48  
49  
50  
51  
52  
53  
54  
55  
56  
57  
58  
59  
60

- 1  
2  
3 923 112. Stacey C, D S, M E, K S, A T. Implementing new models and standards for earlier and  
4 faster diagnosis of cancer. Paper presented at: Health and Care Innovation Expo2018;  
5 924 Manchester, UK.  
6  
7 925  
8 926 113. Inzetta SL, Musarra LL. Breast Care ACCESS Project. *Oncology Issues*. 2018;33:34-45.  
9  
10 927 114. Patt D, L G, M D, et al. Impact of COVID-19 on cancer care: How the pandemic is  
11 delaying cancer diagnosis and treatment for American seniors. *JCO Clin Cancer Inform*.  
12 928 2020(4):1059-1071.  
13  
14 929  
15 930 115. Jacob L, S L, M K, et al. Impact of the COVID-19 pandemic on cancer diagnoses in  
16 general and specialized practices in Germany. *Cancers Journal Translated Name*  
17 931 *Cancers Keyword Heading Cancer diagnosis COVID-19 pandemic General practices*  
18 932 *Germany Specialized practices*. 2021;13(3):1-11.  
19 933  
20 934 116. Chen-See S. Disruption of cancer care in Canada during COVID-19. *Lancet Oncol*.  
21 935 2020;21(8):e374.  
22  
23 936 117. Maringe C, J S, M M, et al. The impact of the COVID-19 pandemic on cancer deaths due  
24 to delays in diagnosis in England, UK: a national, population-based, modelling study.  
25 937 *Lancet Oncol Journal Translated Name The Lancet Oncology*. 2020;21(8):1023-1034.  
26  
27 938  
28 939 118. Alkatout I, M B, Z M, et al. Has COVID-19 Affected Cancer Screening Programs? A  
29 Systematic Review. *Front Oncol Journal Translated Name Frontiers in Oncology*  
30 940 *Keyword Heading cancer coronavirus disease 2019 (COVID-19) diagnosis health care*  
31 941 *screening*. 2021;11:no pagination.  
32  
33 942  
34 943 119. Riera R, A B, R P, et al. Delays and disruptions in cancer health care due to COVID-19  
35 pandemic: Systematic review. *JCO Glob Oncol*. 2021(7):311-323.  
36  
37 944  
38 945 120. Canadian Partnership Against Cancer. *Canadian Strategy for Cancer Control (2019 to*  
39 *2029): Doing together what cannot be done alone* Toronto, Canada: Canadian  
40  
41  
42  
43  
44 946  
45 947  
46  
47 948  
48  
49  
50  
51  
52  
53  
54  
55  
56  
57  
58  
59  
60



**Table 1:** Summary of the characteristics of the included published articles that reported data on effective interventions

| Intervention                                         | Article                          | Study country (Region)               | Study type (Study years)                                            | Cancer type (Population) [Sample size]                | Assessment metric                                                                                        | Results                                                                                                                                                                                                                                                                              |
|------------------------------------------------------|----------------------------------|--------------------------------------|---------------------------------------------------------------------|-------------------------------------------------------|----------------------------------------------------------------------------------------------------------|--------------------------------------------------------------------------------------------------------------------------------------------------------------------------------------------------------------------------------------------------------------------------------------|
| <b>Centralized or coordinated diagnostic service</b> | Christensen 2020 <sup>20</sup>   | Denmark (Odense)                     | Cross-sectional (2016-2017)                                         | Lung (Adult) [20]                                     | Patients' perspective, experiences, and expectations                                                     | Although patients experienced anxiety with the fast-track diagnostic pathway, they still wanted to move through with diagnosis as quickly as possible (Effective)                                                                                                                    |
|                                                      | Common 2018 <sup>23</sup>        | Canada (Newfoundland)                | Case-Control (2015-2016)                                            | Lung (Adult) [133]                                    | Time from first abnormal image to biopsy                                                                 | There was a statistically significant decline in wait times for patients from 61.5 to 36.0 days ( $p < 0.0001$ ) (Effective)                                                                                                                                                         |
|                                                      | Evison 2020 <sup>32</sup>        | UK (Manchester)                      | Before-and-After (2016-2019)                                        | Lung (Adult) [1035]                                   | Mean time from referral to CT                                                                            | The median time from referral to CT was 3 days. Overall 56% and 90% of patients had completed a CT and consultation within 3 and 7 days of referral, respectively (0% and 24% prior to implementation) (Effective)                                                                   |
|                                                      | Ezer 2017 <sup>33</sup>          | Canada (Montreal)                    | Case-Control (2010-2011)                                            | Lung (Adult) [327 (195 RIC; 132 non-RIC)]             | Time from first contact with physician to diagnosis                                                      | Time from first contact to pathological diagnosis was shorter (median (M) 26 days; IQR 14–42 days) vs. control patients (M 40 days; IQR 16–68 days) (Effective)                                                                                                                      |
|                                                      | Jiang 2018 <sup>44</sup>         | Canada (Ontario)                     | Case-Control (2011)                                                 | Breast (Adult) [4381]                                 | Time to diagnosis                                                                                        | The Canadian timeliness targets (time from patients' first referral or test to the cancer diagnosis) were achieved more often than for usual care (71.7% vs. 58.1%, respectively), with associated 10-day (95% CI: 7.8–11.9) reduction in the median diagnostic interval (Effective) |
|                                                      | McKevitt 2017 <sup>54</sup>      | Canada (British Columbia)            | Case-Control (2009)                                                 | Breast (NR) [373]                                     | Diagnostic wait time                                                                                     | Patients had a decreased time to surgical consultation (33 vs 86 days, $p < 0.0001$ ) for both malignant (36 vs 59 days, $p = 0.0007$ ) and benign diagnoses (31 vs 95 days, $p < 0.0001$ ) (Effective)                                                                              |
|                                                      | McKevitt 2018 <sup>55</sup>      | Canada (Vancouver)                   | Case-Control (2012)                                                 | Breast (NR) [176 (40 RABC; 136 TS)]                   | Time from presentation to surgical consultation                                                          | Time from presentation to surgeon evaluation was shorter in the RABC group for patients with breast symptoms (81 vs 35 days, $p < .0001$ ) (Effective)                                                                                                                               |
|                                                      | Moodley 2018 <sup>56</sup>       | South Africa (Western Cape province) | Cross-sectional (2015-2016)                                         | Breast (Adult) [201]                                  | Time between first health care provider visit and date of diagnosis                                      | The median time between the first health care visit and a breast cancer diagnosis was 28 days (IQR 13–58 days). Women whose initial reaction was denial of the breast symptom had a significantly shorter diagnostic interval (11 days vs. 29 days, $p = 0.010$ ) (Effective)        |
| Williams 2018 <sup>93</sup>                          | New Zealand (Northland district) | Before-and-After (2015-2016)         | Lung (Adult) [212 (70 in phase 1, 46 in phase 2 and 71 in phase 3)] | Time from GP referral to first specialist appointment | Time from GP referral to first specialist appointment improved significantly ( $p = 0.005$ ) (Effective) |                                                                                                                                                                                                                                                                                      |
| <b>Interventions to enhance diagnostic services</b>  | Chapman 2020 <sup>17</sup>       | UK (Nottingham)                      | Cross-sectional (2017-2018)                                         | Gastrointestinal (Adult) [1934]                       | Colorectal cancer (CRC) detection rate                                                                   | The symptomatic pathway incorporating FIT was feasible and appeared more clinically effective than pathways based on age and symptoms alone, with FIT results identifying patients with a significantly higher risk                                                                  |

1  
2  
3  
4  
5  
6  
7  
8  
9  
10  
11  
12  
13  
14  
15  
16  
17  
18  
19  
20  
21  
22  
23  
24  
25  
26  
27  
28  
29  
30  
31  
32  
33  
34  
35  
36  
37  
38  
39  
40  
41  
42  
43  
44  
45  
46  
47

|                               |                                    |                               |                              |                              |                                                                        |                                                                                                                                                                                                                       |
|-------------------------------|------------------------------------|-------------------------------|------------------------------|------------------------------|------------------------------------------------------------------------|-----------------------------------------------------------------------------------------------------------------------------------------------------------------------------------------------------------------------|
|                               |                                    |                               |                              |                              | after a FIT                                                            | of CRC (Effective)                                                                                                                                                                                                    |
|                               | Cotton 2020 <sup>24</sup>          | Canada (Ontario)              | Before-and-After (2017-2018) | Lung (NR) [NR]               | Referral to diagnosis                                                  | Monthly patient volumes increased by 65%, and wait time improved by 60% (Effective)                                                                                                                                   |
|                               | Laudicella 2018 <sup>52</sup>      | UK (England)                  | Case-Control (2006-2009)     | Multiple (Adult) [372353]    | Survival of patients                                                   | Rerouting patients from emergency presentation to new referral resulted in better patient survival in all cancer cohorts (Effective)                                                                                  |
|                               | Nixon 2020 <sup>64</sup>           | Canada (Ontario)              | Case-Control (2015-2017)     | Haematological (Adult) [126] | Time from initial consultation to diagnosis of lymphoma                | Median time to lymphoma diagnosis was 16 days for patients assessed in the nurse practitioner-led lymphoma rapid diagnosis clinic and 28 days for historical controls (P<0.001) (Effective)                           |
|                               | Sardi 2019 <sup>75</sup>           | Colombia (Cali)               | Before-and-After (2012-2016) | Multiple (NR) [114]          | Time from initial consultation to biopsy                               | The average time from initial consult to biopsy decreased from 65 to 20 days and from biopsy to diagnosis from 33 to 4 days (Effective)                                                                               |
|                               | Setyowibowo 2020 <sup>77</sup>     | Indonesia (Bandung West Java) | RCT (2017)                   | Breast (Adult) [107]         | Time between first visit to the hospital and a definitive diagnosis    | The intervention reduced the time to definitive diagnosis: mean difference = -13.26, 95% CI = -24.51 to -2.00, P=0.02) (Effective)                                                                                    |
|                               | Skevington 2020 <sup>78</sup>      | UK (Manchester)               | RCT (2015-2016)              | Multiple (Adult) [107]       | Quality of life                                                        | Psychological quality of life increased (Effective)                                                                                                                                                                   |
|                               | Stenman 2019 <sup>80</sup>         | Sweden (Kristianstad)         | Cross-sectional (2015)       | Multiple (Adult) [290]       | Total diagnostic interval                                              | Shorter diagnostic interval (time from referral decision in primary care to diagnosis). The median primary care interval was 21 days, and the median diagnostic interval was 11 days (Effective)                      |
|                               | Tafari 2020 <sup>83</sup>          | USA (NR)                      | Case-Control (2016-2018)     | Prostate (Adult) [370]       | Time from multiparametric Magnetic Resonance Imaging (mpMRI) to biopsy | One-Stop patients experienced shorter time from mpMRI to biopsy (0 vs 7 days; p< 0.01) (Effective)                                                                                                                    |
|                               | Williams 2019 <sup>94</sup>        | Botswana (Gaborone)           | Before-and-After (2015-2017) | Skin (Adult) [218]           | Diagnostic histology turnaround times                                  | Median turnaround in the post dermatology quality improvement interval was 11 days (IQR, 12-23 days) compared with 32 days in the pre-dermatology quality improvement interval (IQR, 24-56 days; P<0.001) (Effective) |
| <b>Multidisciplinary team</b> | Phillips 2019 <sup>68</sup>        | USA (NR)                      | Case-Control (2014-2016)     | Lung (NR) [218]              | Time to diagnosis                                                      | Compared to controls, patients with lung cancer in the Lung Cancer Strategist Program cohort had an expedited time from suspicious finding to diagnosis (34 vs 44 days, p=0.027) (Effective)                          |
| <b>Patient navigation</b>     | Chavarri-Guerra 2019 <sup>18</sup> | Mexico (Mexico City)          | Before-and-After (2016-2017) | Multiple (Adult) [70]        | Feasibility                                                            | 91% of patients successfully obtained appointments at cancer centers in <3 months (Effective)                                                                                                                         |
|                               | Drudge-Coates 2019 <sup>28</sup>   | UK (London)                   | Before-and-After (2012-2015) | Prostate (Adult) [60]        | Waiting times from the GP                                              | Compared with the previous physician-led service, waiting times for patient appointment fell by 52% over a 3-year study period (Effective)                                                                            |

|                               |                             |                                              |                              |                                                                                      |                                                                           |                                                                                                                                                                                                                                                                 |
|-------------------------------|-----------------------------|----------------------------------------------|------------------------------|--------------------------------------------------------------------------------------|---------------------------------------------------------------------------|-----------------------------------------------------------------------------------------------------------------------------------------------------------------------------------------------------------------------------------------------------------------|
|                               |                             |                                              |                              |                                                                                      | referral to initial clinic assessment                                     |                                                                                                                                                                                                                                                                 |
|                               | Whitley 2017 <sup>92</sup>  | USA (Boston, Denver, San Antonio, and Tampa) | Case-Control (2007-2011)     | Multiple (Adult) [6349]                                                              | Delays in diagnostic resolution based on Charlson Comorbidity Index score | Patient navigation reduced delays in diagnostic resolution, with the greatest benefits seen for those with a Charlson Comorbidity Index score $\geq 2$ (Effective)                                                                                              |
|                               | Antel 2020 <sup>13</sup>    | South Africa (Cape Town)                     | Before-and-After (2017-2019) | Haematological (Adult) [130]                                                         | Diagnostic interval                                                       | Compared with a historical cohort, the diagnostic interval (time from first health visit to diagnostic biopsy) for patients with lymphoma was significantly shorter, 13.5 vs 48 days ( $p=0.002$ ) (Effective)                                                  |
|                               | Arhi 2020 <sup>14</sup>     | UK (National)                                | Case-Control (2000-2013)     | Gastrointestinal (Adult) [7130]                                                      | Hazard ratios of death                                                    | Patients referred between 2 weeks to 3 months, and after 3 months with red-flag symptoms demonstrated a significantly worse prognosis than patients who were referred within 2 weeks (Effective)                                                                |
|                               | Chng 2020 <sup>19</sup>     | UK (Newcastle-upon-Tyne)                     | Case-Control (2015-2019)     | Brain (Adult) [101]                                                                  | Tumour detection rate                                                     | With guideline adherence, the brain tumour detection rate was 3-fold higher (36.0% vs 11.5%, $p<0.02$ ) (Effective)                                                                                                                                             |
|                               | Creak 2020 <sup>25</sup>    | UK (Brighton; Sussex)                        | Cross-sectional (2015-2018)  | Multiple (Adult) [258]                                                               | Time to diagnosis                                                         | Direct GP referrals were feasible and manageable within a tertiary clinic and resulted in high rates of cancer diagnoses and early contact with an oncologist and nurse specialist, cutting short the 'limbo' time of high anxiety before diagnosis (Effective) |
|                               | Hennessy 2020 <sup>36</sup> | Ireland (Dublin)                             | Case-Control (2012-2018)     | Lung (NR) [864]                                                                      | Time to diagnosis                                                         | Time to diagnosis was longer in those who had attended a post Rapid Access Lung Cancer Clinic CT (34.5 versus 21 days) (Effective)                                                                                                                              |
| <b>Rapid referral pathway</b> | Jones 2018 <sup>45</sup>    | UK (East Midlands)                           | Case-Control (2013-2015)     | Gastrointestinal (NR) [1401 (340 STTP, 495 traditional pathway, 566 control trusts)] | Time from referral to diagnosis                                           | The pathway saved a mean of 7 days from referral to treatment (with a 95% CI of 3 to 11 days, $p<0.008$ ) and a mean of 16 days from referral to diagnosis, when compared with a traditional pathway (Effective)                                                |
|                               | Joyce 2020 <sup>46</sup>    | UK (National)                                | Cross-sectional (2017-2018)  | Multiple (Mixed age) [NR]                                                            | Proportion with emergency diagnosis of cancer                             | A lower proportion of emergency diagnosis of cancer was found with higher 2 weeks wait referral conversion rate (Effective)                                                                                                                                     |
|                               | Pearson 2020 <sup>67</sup>  | UK (National)                                | Case-Control (2014)          | Multiple (Mixed age) [12873]                                                         | Primary care interval                                                     | Compared with patients with a specific alarm symptom, patients with non-specific but concerning symptoms had higher odds of having longer primary care intervals (adjusted OR: 1.24 (1.11 to 1.36)) (Effective)                                                 |
|                               | Round 2020 <sup>72</sup>    | UK (National)                                | Case-Control (2011-2017)     | Multiple (Mixed age) [1469103]                                                       | Risk of death                                                             | Cancer patients from the highest referring practices had a lower hazard of death (hazard ratio [HR] = 0.96; 95% confidence interval [CI] = 0.95 to 0.97) (Effective)                                                                                            |
|                               | Sandager 2019 <sup>74</sup> | Denmark (National)                           | Cross-sectional (2010)       | Multiple (Adult) [2256]                                                              | Patient experience                                                        | Overall, pathway referred patients were 21% more likely than non-pathway referred patients to report a positive experience (PR = 1.21 [95% CI: 1.11–1.30]) (Effective)                                                                                          |

|                                           |                                     |                             |                              |                                     |                                                                                   |                                                                                                                                                                                                                                                                                              |
|-------------------------------------------|-------------------------------------|-----------------------------|------------------------------|-------------------------------------|-----------------------------------------------------------------------------------|----------------------------------------------------------------------------------------------------------------------------------------------------------------------------------------------------------------------------------------------------------------------------------------------|
|                                           | Thanapal 2020 <sup>86</sup>         | UK (London)                 | Before-and-After (2012-2018) | Gastrointestinal (Adult) [1648]     | Time to diagnosis                                                                 | Patients on the pathway took 25 days to obtain results as compared to 40 days in the standard pathway (Effective)                                                                                                                                                                            |
|                                           | Vijayakumar 2020 <sup>90</sup>      | UK (Buckinghamshire)        | Cross-sectional (2018)       | Lung (NR) [111]                     | Patient satisfaction                                                              | High satisfaction with the service, with scores above 93% in all parameters (Effective)                                                                                                                                                                                                      |
| <b>Standardized care pathway</b>          | Alonso-Abreu 2017 <sup>12</sup>     | Spain (Tenerife)            | Case-Control (2008-2010)     | Gastrointestinal (Adult) [257]      | Survival rates                                                                    | Survival rates at 12 and 60 months after treatment were significantly higher in the early colonoscopy group compared with the standard schedule colonoscopy group ( $p < 0.001$ ) (Effective)                                                                                                |
|                                           | Dahl 2017 <sup>26</sup>             | Denmark (Countrywide)       | Before-and-After (2004-2010) | Multiple (Adult) [3292]             | Patient satisfaction for waiting time from referral to consultation at a hospital | Implementation of pathway was associated with a reduced level of patient-reported dissatisfaction with long waiting time from the time of referral to the first consultation at the hospital (Effective)                                                                                     |
|                                           | Laerum 2020 <sup>49</sup>           | Norway (Kristiansand)       | Before-and-After (2007-2016) | Lung (Adult) [780]                  | Referral interval                                                                 | The median referral interval among all patients was reduced by two days from baseline to the next time period when the local diagnostic algorithm was streamlined (Effective)                                                                                                                |
|                                           | Mullin 2020 <sup>59</sup>           | Canada (Ontario)            | Before-and-After (2018-2019) | Lung (NR) [833]                     | Time from referral to diagnosis                                                   | Time from referral to positron emission tomography decreased (from 38.5 to 15.7 days), time from referral to brain imaging decreased (from 33.4 to 13.1 days), and time from referral to diagnosis decreased (from 38.0 to 22.7 days), all demonstrating special-cause variation (Effective) |
|                                           | Nilbert 2018 <sup>63</sup>          | Sweden (Skane County)       | Case-Control (2015-2016)     | Urinary tract (Adult) [1871]        | Time from sign/symptom to diagnosis                                               | The standardized care pathway shortened the diagnostic delay to a median of 25 days compared to 35 days for regular referral ( $p=0.01$ ) (Effective)                                                                                                                                        |
|                                           | Rankin 2017 <sup>71</sup>           | Australia (New South Wales) | Cross-sectional (2014)       | Lung (Adult) [19]                   | Patient concerns urgency, advocacy, and referral                                  | Patients and general practitioners expressed similar themes across the diagnostic and pretreatment intervals (Effective)                                                                                                                                                                     |
| <b>Target or benchmark for wait times</b> | Jeyakumar 2020 <sup>42</sup>        | Australia (Victoria)        | Case-Control (2018)          | Lung (Adult) [46]                   | Mean time from initial CT to tissue diagnosis                                     | The Standard Care group met the target for treatment commencement in 33.3% of cases whereas the Rapid Access Clinic group achieved this in 77% (Effective)                                                                                                                                   |
|                                           | Jiang 2017 <sup>43</sup>            | China (Shanghai)            | Case-Control (2011-2015)     | Lung (NR) [4000]                    | Time from initial respiratory consultation to treatment decision                  | Takes a median 4 workdays (range 3 to 6) for a new patient from initial respiratory consultation to treatment decision, whereas in many countries, 14 workdays are considered a reasonable timeline (Effective)                                                                              |
|                                           | Sagar 2020 <sup>73</sup>            | UK (Milton, Somerset)       | Before-and-After (2019-2020) | Gastrointestinal (Mixed age) [1255] | 28-day target attainment                                                          | Attainment of the 28-day diagnosis target for all suspected colorectal cancer referrals improved following the establishment of a new pathway (88% vs. 82%, $P < 0.0001$ ) (Effective)                                                                                                       |
|                                           | Stevenson-Hornby 2018 <sup>81</sup> | UK (Wigan)                  | Before-and-After (2017)      | Gastrointestinal (NR) [NR]          | Percentage diagnosed                                                              | 55% of all referrals were found to have hepatobiliary-pancreatic cancer after pathway trial compared with 19% before (Effective)                                                                                                                                                             |
|                                           | Zhu 2020 <sup>96</sup>              | Sweden (Orebro)             | RCT (2015-2018)              | Prostate (Adult) [204]              | Self-reported symptoms of                                                         | Significant changes in depression symptoms and self-rated sleep quality suggested a benefit of the fast-track                                                                                                                                                                                |

|                                                |                                   |                                      |                                   |                                                                                                  |                                                                                                                                                                                                                                |                                                                                                                                                                                                                                                                                                                               |
|------------------------------------------------|-----------------------------------|--------------------------------------|-----------------------------------|--------------------------------------------------------------------------------------------------|--------------------------------------------------------------------------------------------------------------------------------------------------------------------------------------------------------------------------------|-------------------------------------------------------------------------------------------------------------------------------------------------------------------------------------------------------------------------------------------------------------------------------------------------------------------------------|
|                                                |                                   |                                      |                                   |                                                                                                  | stress                                                                                                                                                                                                                         | workup intervention (Effective)                                                                                                                                                                                                                                                                                               |
|                                                | *Piano 2019 <sup>69</sup>         | UK<br>(Guildford, Bradford)          | Cross-sectional (NR)              | Multiple (Adult) [29]                                                                            | Patient attitudes within the context of their recent referral experiences                                                                                                                                                      | Most patients had experienced swift referral. It was difficult for patients to understand how the new standard could affect upon the time that it takes to progress through the system. Responsibility for meeting the standard was also a concern as patients did not see their own behaviours as a form of Involvement (NA) |
| <b>Technology to support diagnosis process</b> | Cazzaniga 2019 <sup>16</sup>      | Italy (Bergamo)                      | Case-Control (2017)               | Skin (Adult) [232]                                                                               | Diagnostic accuracy                                                                                                                                                                                                            | The diagnostic accuracy of the online assessment compared with direct clinical examination was significant (Effective)                                                                                                                                                                                                        |
|                                                | Cock 2017 <sup>22</sup>           | UK (NR)                              | Guideline development (2014-2016) | Gastrointestinal (Adult) [NR]                                                                    | Patient satisfaction                                                                                                                                                                                                           | Audits were being conducted to assess and compare patient satisfaction with face-to-face versus telephone assessments, although intervention was well-received (Effective)                                                                                                                                                    |
|                                                | Eastham 2017 <sup>29</sup>        | UK (Leeds)                           | Before-and-After (2015-2016)      | Multiple (Adult) [NR]                                                                            | Form completion rates and time spent processing forms                                                                                                                                                                          | Form completion rates improved from a mean of 44% of forms at baseline (n = 210) to 99% post-intervention n = 236). Time spent processing forms also decreased from a mean of 96 seconds to 35 seconds post-introduction of the new system (Effective)                                                                        |
|                                                | Hirst 2018 <sup>37</sup>          | UK (London)                          | Cross-sectional (2016)            | Multiple (Adult) [NR]                                                                            | GP perspectives on txt-netting                                                                                                                                                                                                 | Text messages were perceived to be an acceptable potential strategy for safety netting patients with low-risk cancer symptoms (Effective)                                                                                                                                                                                     |
|                                                | Hunt 2020 <sup>38</sup>           | UK (England)                         | Case-Control (2018)               | Skin (Adult) [150 (75 consecutive TD referrals paired with 75 standard "Face to Face" controls)] | Time from referral to first appointment and diagnostic rates                                                                                                                                                                   | There was a 23% absolute and 37% relative increase in diagnostic completion rates in the mobile van compared with the central hospital facility (p=0.0001) (Effective)                                                                                                                                                        |
|                                                | Moor 2019 <sup>57</sup>           | UK (Newcastle-upon-Tyne; Birmingham) | Case-Control (2007-2010)          | Head and Neck (Mixed age) [4715]                                                                 | Diagnostic accuracy                                                                                                                                                                                                            | Machine learning algorithms accurately and effectively classify patients referred with suspected head and neck cancer symptoms (Effective)                                                                                                                                                                                    |
|                                                | Moreno-Ramirez 2017 <sup>58</sup> | Spain (Southern region)              | Case-Control (2004-2015)          | Skin (NR) [2009]                                                                                 | Waiting times for referral                                                                                                                                                                                                     | Waiting times for referral for teledermatology network versus conventional letter referral system 12.31 (8.22–16.40) vs 88.62 (38.42–138.82) (Effective)                                                                                                                                                                      |
|                                                | Nicholson 2020 <sup>62</sup>      | UK (London)                          | Cross-sectional (2018-2019)       | Skin (NR) [60]                                                                                   | Patient satisfaction                                                                                                                                                                                                           | Over 80% (49) would recommend the service, and the majority felt confident with the teledermatology model. Overall, patients would be happy to complete electronic questionnaires and receive results electronically, with younger patients being more amenable to this (Effective)                                           |
|                                                | Orchard 2020 <sup>65</sup>        | UK (Bristol)                         | Before-and-After (2014-2017)      | Gastrointestinal (Mixed age) [11357]                                                             | Time from referral to diagnosis                                                                                                                                                                                                | Time from referral to diagnosis reduced from 39 to 21 days and led to a dramatic improvement in patients starting treatment within 62 days (Effective)                                                                                                                                                                        |
| Snoswell 2018 <sup>79</sup>                    | New Zealand (Countrywide)         | Not clear (2012)                     | Skin (Adult) [300]                | Time to clinical resolution                                                                      | Mean time to clinical resolution was 9 days (range, 1-50 days) with teledermoscopy referral compared with 35 days (range, 0-138 days) with usual care alone (difference, 26 days; 95%credible interval 13-38 days) (Effective) |                                                                                                                                                                                                                                                                                                                               |

1  
2  
3  
4  
5  
6  
7  
8  
9  
10  
11  
12  
13  
14  
15  
16  
17  
18  
19  
20  
21  
22  
23  
24  
25  
26  
27  
28  
29  
30  
31  
32  
33  
34  
35  
36  
37  
38  
39  
40  
41  
42  
43  
44  
45  
46  
47

|  |                                |                            |                     |                    |                                                                  |                                                                                                                                                                                             |
|--|--------------------------------|----------------------------|---------------------|--------------------|------------------------------------------------------------------|---------------------------------------------------------------------------------------------------------------------------------------------------------------------------------------------|
|  | Sunderland 2020 <sup>82</sup>  | New Zealand (Auckland)     | Case-Control (2016) | Skin (NR) [809]    | Efficacy of diagnostic tool                                      | A positive predictive value (PPV) of 38.1% and number needed to excise (NNE) of 2.6, with less than 10% of referrals triaged for teledermatology confirmed as melanoma (24/264) (Effective) |
|  | Uthoff 2018 <sup>87</sup>      | India (Bangalore, Dimapur) | Case-Control (NR)   | Oral (Adult) [99]  | Diagnostic accuracy                                              | Sensitivities, specificities, positive predictive values, and negative predictive values ranged from 81.25% to 94.94% (Effective)                                                           |
|  | Vestergaard 2020 <sup>89</sup> | Denmark (Southern Denmark) | Case-Control (2018) | Skin (Adult) [519] | Percentage of lesions not requiring further in-person assessment | On evaluation by teledermatology, 31.5% of lesions did not need further in-person assessment (Effective)                                                                                    |

CRC = colorectal cancer; CT = computed tomography; FIT = faecal immunochemical testing; GP = general practitioner; NR = not reported; RABC = rapid access breast clinic; RCT = randomized controlled trial; RIC = rapid investigation clinic; STTP = straight to test pathway; TD = teledermatology; TS = traditional system; UK = United Kingdom; USA = United States of America; \* = effective but not applicable; IQR = interquartile range

Peer review only

1  
2  
3 **Figures**  
4  
5  
6

7 **Figure 1:** Modified PRISMA flow chart  
8  
9

10 **Figure 2:** Geographical mapping of the included published articles  
11  
12

13  
14 **Figure 3:** Summary of cancer types reported by the included published articles  
15  
16

17  
18 **Figure 4:** Summary of intervention types reported by the included published articles  
19  
20  
21  
22  
23  
24  
25  
26  
27  
28  
29  
30  
31  
32  
33  
34  
35  
36  
37  
38  
39  
40  
41  
42  
43  
44  
45  
46  
47  
48  
49  
50  
51  
52  
53  
54  
55  
56  
57  
58  
59  
60

1  
2  
3  
4  
5  
6  
7  
8  
9  
10  
11  
12  
13  
14  
15  
16  
17  
18  
19  
20  
21  
22  
23  
24  
25  
26  
27  
28  
29  
30  
31  
32  
33  
34  
35  
36  
37  
38  
39  
40  
41  
42  
43  
44  
45  
46  
47  
48  
49  
50  
51  
52  
53  
54  
55  
56  
57  
58  
59  
60

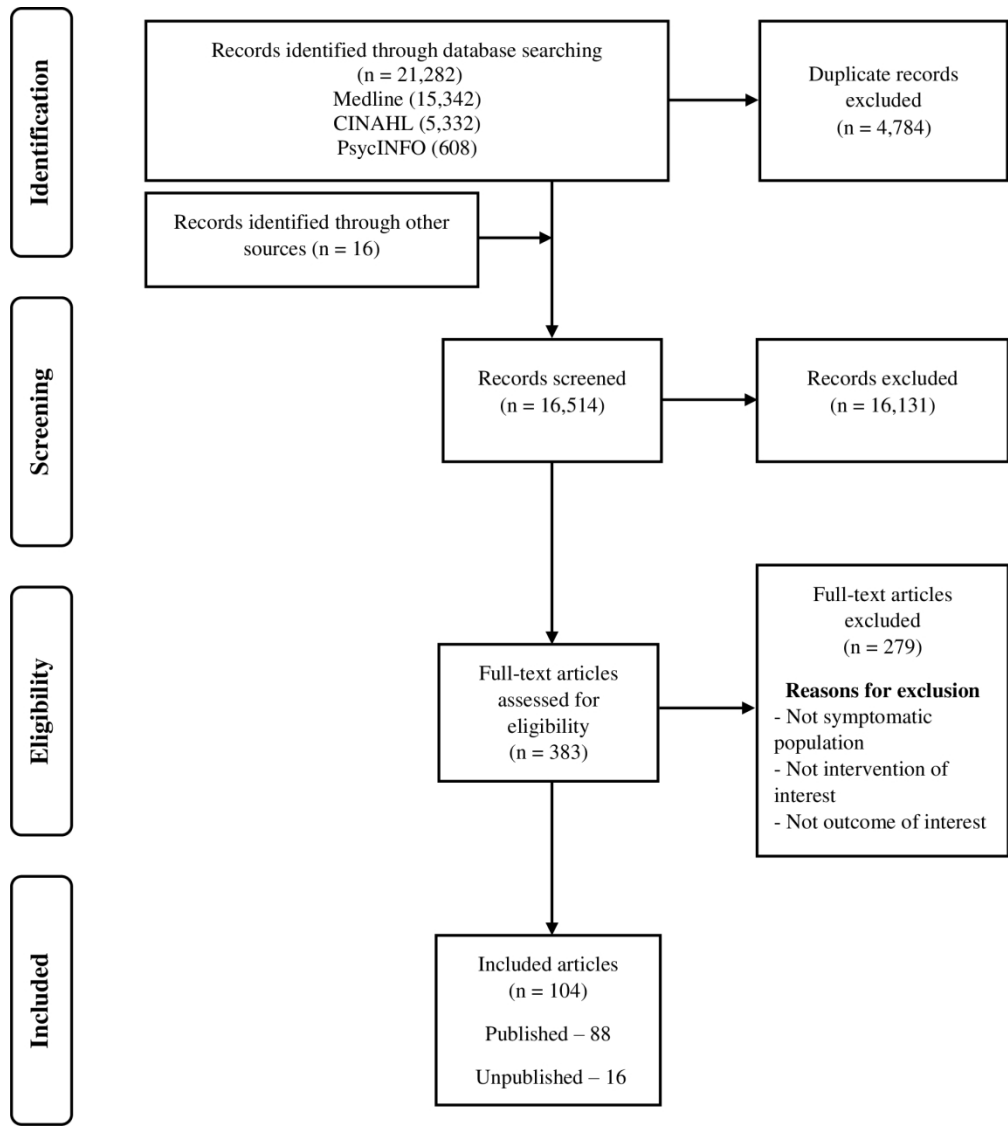

Figure 1: Modified PRISMA flow chart

166x186mm (300 x 300 DPI)



1  
2  
3  
4  
5  
6  
7  
8  
9  
10  
11  
12  
13  
14  
15  
16  
17  
18  
19  
20  
21  
22  
23  
24  
25  
26  
27  
28  
29  
30  
31  
32  
33  
34  
35  
36  
37  
38  
39  
40  
41  
42  
43  
44  
45  
46  
47  
48  
49  
50  
51  
52  
53  
54  
55  
56  
57  
58  
59  
60

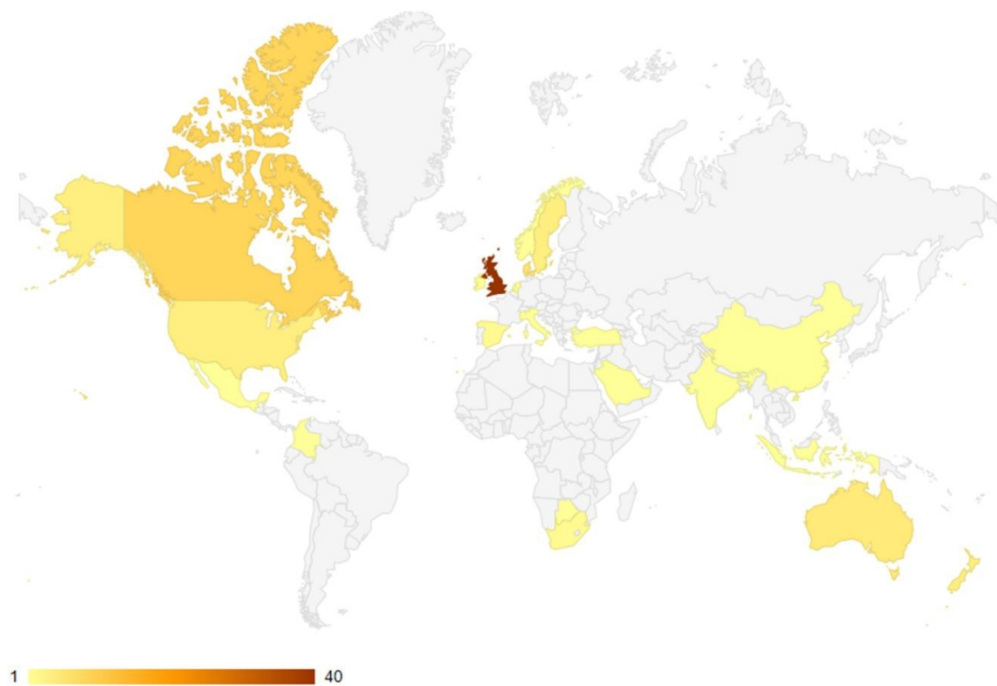

159x108mm (300 x 300 DPI)

1  
2  
3  
4  
5  
6  
7  
8  
9  
10  
11  
12  
13  
14  
15  
16  
17  
18  
19  
20  
21  
22  
23  
24  
25  
26  
27  
28  
29  
30  
31  
32  
33  
34  
35  
36  
37  
38  
39  
40  
41  
42  
43  
44  
45  
46  
47  
48  
49  
50  
51  
52  
53  
54  
55  
56  
57  
58  
59  
60

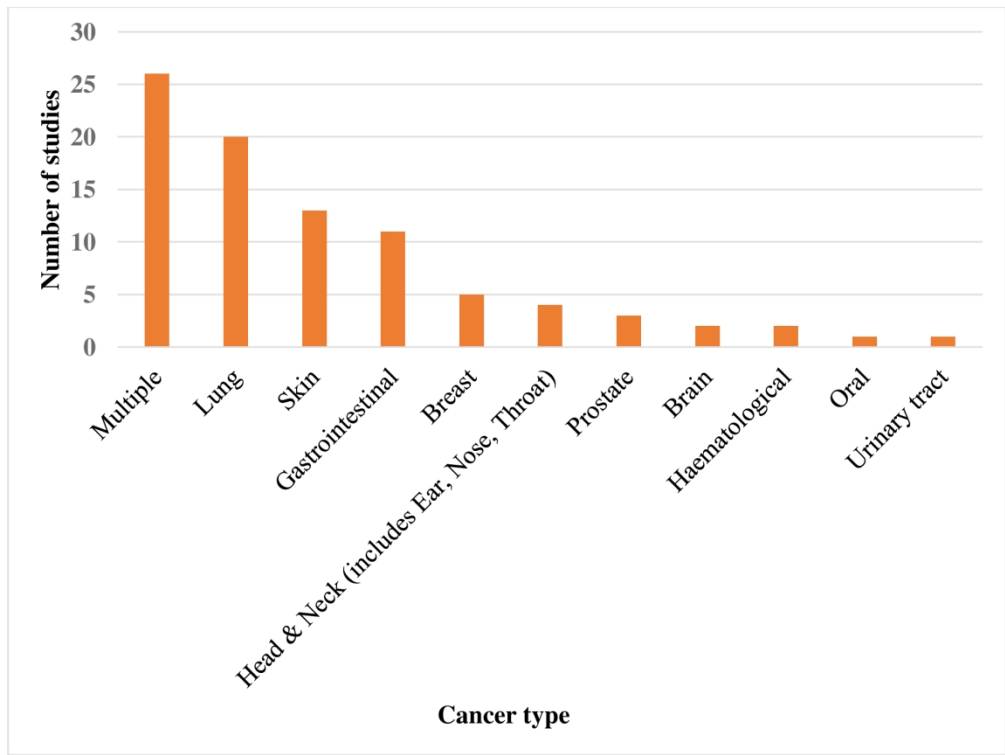

165x123mm (300 x 300 DPI)

1  
2  
3  
4  
5  
6  
7  
8  
9  
10  
11  
12  
13  
14  
15  
16  
17  
18  
19  
20  
21  
22  
23  
24  
25  
26  
27  
28  
29  
30  
31  
32  
33  
34  
35  
36  
37  
38  
39  
40  
41  
42  
43  
44  
45  
46  
47  
48  
49  
50  
51  
52  
53  
54  
55  
56  
57  
58  
59  
60



165x137mm (300 x 300 DPI)

## Appendices

### Appendix 1: Project work plan

#### About the Project Team

At the Knowledge Synthesis Team, George and Fay Yee Centre for Healthcare Innovation, we have an experienced team of methodologists, systematic reviewers, a medical librarian and biostatistician. Over the past 8 years we have supported numerous research teams and guideline developers by providing training, support and conducting evidence syntheses on their behalf. In addition, several of our team members hold academic positions with the University of Manitoba where they teach, supervise students, and advance the science and practice of knowledge synthesis.

#### Proposed Method

##### Methods

Using a team of experienced systematic reviews and methodologists, with expertise in research methodology, knowledge synthesis and implementation science, we will update the 2018 peer-reviewed and grey literature scan by conducting a rapid scoping review to include contemporary, national and international leading interventions for improving accurate and timely cancer diagnosis focusing on the symptomatic population and summarize efficacy, impact and sustainability of identified interventions. We will identify evidence to answer the following key questions:

KQ 1. Are there practice guidelines, care pathways or other initiatives (e.g., benchmarks/ targets for wait times, streamlined or rapid diagnostic services, multidisciplinary teams, patient navigators and/or navigation, etc.) that have been found to streamline and enhance accurate and timely diagnosis in symptomatic individuals?

- How were patients involved in the design, development and/ or implementation of these initiatives?
- How were providers (e.g., primary care providers) involved in the design, development and/or implementation of these initiatives?

KQ 2. What are the leading interventions for innovative and/or virtual approaches (e.g., technology-based) to seamless care (i.e., minimally disruptive care that is found to be more convenient/coordinated/timely/less stressful to the patients) in the pre-diagnosis phase within Canada and abroad?

- How have these interventions been applied, including identification of successes and lessons learned where possible?
- Were these interventions evaluated and if so, what were the findings?
- How were patients involved in the design, development and/ or implementation of these interventions?

KQ 3. What are the identified performance metrics that can be used to measure the suspicion to diagnosis phase; and where and how are these metrics used?

- Are there specific metrics used to measure the patient experience?
- What data is captured by decision-support systems and how does the data and clinical systems work together?
- Is there evidence on sustainability of the model?

KQ 4. What are the key points of care in a patient's experience (e.g., diagnostic tests, physician consultations, etc.) as they navigate the system from initial symptoms/ suspicion of cancer to diagnosis?

1  
2  
3  
4 KQ 5. Have specific considerations been applied to underserved populations including Indigenous,  
5 rural, and remote populations within the context of each of the questions above?  
6  
7

### 8 **Study eligibility criteria**

9 This review will focus on published and unpublished studies that answer the key questions since 2017.  
10 Our focus is on comparative studies that applied a protocol/guideline or a specific intervention or  
11 intervention plan. Having said that, we anticipate the need to review lower quality study designs (e.g.,  
12 retrospective, and uncontrolled studies). As such, there will be no restriction on the study design, but will  
13 be limited to English language publications for feasibility.  
14

### 15 **Search strategy and study selection**

16 A knowledge synthesis librarian has designed and executed a literature search strategy in MEDLINE  
17 (Ovid). The search strategy was peer-reviewed by a second librarian and adapted for other bibliographic  
18 databases: Cinahl (Ebsco) and Psycinfo (Ovid). Search strategies are presented in Appendix 1. All  
19 retrieved records were imported into EndNote for citation management.  
20 One reviewer will screen each identified citation for eligibility. Full texts of all relevant citations will be  
21 reviewed by two reviewers. All conflicts will be resolved by discussion and/ or a third reviewer, as  
22 needed. We will record the number of ineligible citations at the title/ abstract screening stage, and both  
23 the number and reason for ineligibility at the full-text articles.  
24

### 25 **Data extraction**

26 We will develop data extraction forms and pilot them on a small selection of studies. Extracted data will  
27 be stored and managed in MS Excel. One reviewer will independently extract data from included studies  
28 and another reviewer will independently check the extracted data for errors. Disagreements will be  
29 resolved by discussion between reviewers and/ or by involving a third reviewer, as needed.  
30

### 31 **Data analysis**

32 We will present specific characteristics of all included studies in a tabular form. The analysis of the  
33 extracted data will be descriptive.  
34

### 35 **Study dissemination**

36 We will submit reports from this study as a technical report to CPAC.  
37  
38  
39  
40

## 41 **Knowledge User Engagement Plan**

42 We will be providing a bi-weekly update to CPAC on the progression of the review. Specifically, we will  
43 engage during specific time points to review progress and next steps:  
44

- 45 - Protocol
- 46 - Level I Screening (Title/ Abstract screening phase)
- 47 - Level II Screening (Full-text screening phase)
- 48 - Data Extraction
- 49 - Data Analysis
- 50 - Report
- 51

## 52 **Declaration of Conflict of Interest**

53  
54  
55 None  
56  
57

**Appendix 2: MEDLINE (Ovid) search strategy**

|     |                                                                                                                                                                                                                                                                                                                                                                                                                                                                                                                                                                                                                                                                                                                                                                                 |         |
|-----|---------------------------------------------------------------------------------------------------------------------------------------------------------------------------------------------------------------------------------------------------------------------------------------------------------------------------------------------------------------------------------------------------------------------------------------------------------------------------------------------------------------------------------------------------------------------------------------------------------------------------------------------------------------------------------------------------------------------------------------------------------------------------------|---------|
| 1.  | "early detection of cancer"/                                                                                                                                                                                                                                                                                                                                                                                                                                                                                                                                                                                                                                                                                                                                                    | 26241   |
| 2.  | (cancer* or tumor* or neoplasm* or malignan* or metasta* or oncogen* or oncolog*).ti                                                                                                                                                                                                                                                                                                                                                                                                                                                                                                                                                                                                                                                                                            | 1795604 |
| 3.  | (carcinoma* or adenoma* or adenocarcinoma* or adeno-carcinoma* or blastoma* or carcinosarcoma* or carcino-sarcoma* or leukemia* or leukaemia* or lymphoma* or melanoma* or mesenchymoma* or mesothelioma* or sarcoma* or thymoma*).ti                                                                                                                                                                                                                                                                                                                                                                                                                                                                                                                                           | 844480  |
| 4.  | or/2-3                                                                                                                                                                                                                                                                                                                                                                                                                                                                                                                                                                                                                                                                                                                                                                          | 2477759 |
| 5.  | 1 or 4                                                                                                                                                                                                                                                                                                                                                                                                                                                                                                                                                                                                                                                                                                                                                                          | 2483642 |
| 6.  | early diagnosis/ or delayed diagnosis/                                                                                                                                                                                                                                                                                                                                                                                                                                                                                                                                                                                                                                                                                                                                          | 33272   |
| 7.  | (prediagnos* or pre-diagnos* or care path? or cancer path? or care pathway* or cancer pathway* or diagnos* phase* or diagnos* path? or referral path? or diagnos* pathway* or referral pathway* or diagnos* interval* or referral interval* or consult* interval* or "time-to-treat" or "time-to-treatment").ti,ab,kf.                                                                                                                                                                                                                                                                                                                                                                                                                                                          | 26471   |
| 8.  | ((early or earlier or prompt* or late or later or rapid or wait* or delay* or timel* or longtime or interval* or route*) adj3 (diagnos* or refer or referred or referral* or referring or consult*).ti,ab,kf.                                                                                                                                                                                                                                                                                                                                                                                                                                                                                                                                                                   | 214615  |
| 9.  | ((diagnos* or confirm* or refer* or consult* or investigat*) adj4 (timelapse* or time lapse* or time elapse* or fasttrack* or fast-track* or timeline* or time line*).ti,ab                                                                                                                                                                                                                                                                                                                                                                                                                                                                                                                                                                                                     | 1510    |
| 10. | delay*.ti                                                                                                                                                                                                                                                                                                                                                                                                                                                                                                                                                                                                                                                                                                                                                                       | 74391   |
| 11. | wait* time*.ti,ab.                                                                                                                                                                                                                                                                                                                                                                                                                                                                                                                                                                                                                                                                                                                                                              | 13384   |
| 12. | or/6-11                                                                                                                                                                                                                                                                                                                                                                                                                                                                                                                                                                                                                                                                                                                                                                         | 338665  |
| 13. | 4 and 12                                                                                                                                                                                                                                                                                                                                                                                                                                                                                                                                                                                                                                                                                                                                                                        | 58490   |
| 14. | diagnos*.ti,ab,kf                                                                                                                                                                                                                                                                                                                                                                                                                                                                                                                                                                                                                                                                                                                                                               | 2562935 |
| 15. | 13 and (1 or 14)                                                                                                                                                                                                                                                                                                                                                                                                                                                                                                                                                                                                                                                                                                                                                                | 48832   |
| 16. | (interprofessional* or inter-professional* or multidisciplin* or multi-disciplin* or navigator* or coordinator* or co-ordinator* or ((patient* or cancer* or care) adj2 (navigat* or coordinat* or co-ordinat* or journey* or continuum*)) or mobile or phone* or smartphone* or reminder* or tele* or information technolog* or communicat*).ti                                                                                                                                                                                                                                                                                                                                                                                                                                | 177088  |
| 17. | 16 and 5                                                                                                                                                                                                                                                                                                                                                                                                                                                                                                                                                                                                                                                                                                                                                                        | 10725   |
| 18. | 15 or 17                                                                                                                                                                                                                                                                                                                                                                                                                                                                                                                                                                                                                                                                                                                                                                        | 59240   |
| 19. | limit 18 to english language                                                                                                                                                                                                                                                                                                                                                                                                                                                                                                                                                                                                                                                                                                                                                    | 49045   |
| 20. | (exp animal experiment/ or exp animal model/ or exp transgenic animal/ or animal/ or chordata/ or vertebrate/ or tetrapod/ or amniote/ or exp amphibia/ or mammal/ or exp reptile/ or therian/ or placental mammals/ or exp marsupial/ or euarchontoglires/ or exp xenarthra/ or primate/ or exp scandentia/ or haplorhini/ or exp prosimian/ or simian/ or exp tarsiiiform/ or catarrhini/ or exp platyrrhini/ or ape/ or exp cercopithecidae/ or hominid/ or exp hylobatidae/ or exp chimpanzee/ or exp gorilla/ or (animal or animals or pisces or fish or fishes or catfish or catfishes or sheatfish or silurus or arius or heteropneustes or clarias or gariepinus or fathead minnow or fathead minnows or pimephales or promelas or cichlidae or trout or trouts or char | 4778446 |

1 or chars or salvelinus or salmo or oncorhynchus or guppy or guppies or millionfish or poecilia  
 2 or goldfish or goldfishes or carassius or auratus or mullet or mullets or mugil or curema or  
 3 shark or sharks or cod or cods or gadus or morhua or carp or carps or cyprinus or carpio or  
 4 killifish or eel or eels or anguilla or zander or sander or lucioperca or stizostedion or turbot or  
 5 turbot or psetta or flatfish or flatfishes or plaice or pleuronectes or platessa or tilapia or  
 6 tilapias or oreochromis or sarotherodon or common sole or dover sole or solea or zebrafish or  
 7 zebrafishes or danio or rerio or seabass or dicentrarchus or labrax or morone or lamprey or  
 8 lampreys or petromyzon or pumpkinseed or pumpkinseeds or lepomis or gibbosus or herring  
 9 or clupea or harengus or amphibia or amphibian or amphibians or anura or salientia or frog or  
 10 frogs or rana or toad or toads or bufo or xenopus or laevis or bombina or epidalea or calamita  
 11 or salamander or salamanders or newt or newts or triturus or reptilia or reptile or reptiles or  
 12 bearded dragon or pogona or vitticeps or iguana or iguanas or lizard or lizards or anguis  
 13 fragilis or turtle or turtles or snakes or snake or aves or bird or birds or quail or quails or  
 14 coturnix or bobwhite or colinus or virginianus or poultry or poultries or fowl or fowls or  
 15 chicken or chickens or gallus or zebra finch or taeniopygia or guttata or canary or canaries or  
 16 serinus or canaria or parakeet or parakeets or grasskeet or parrot or parrots or psittacine or  
 17 psittacines or shelduck or tadorna or goose or geese or branta or leucopsis or woodlark or  
 18 lullula or flycatcher or ficedula or hypoleuca or dove or doves or geopelia or cuneata or duck  
 19 or ducks or greylag or graylag or anser or harrier or circus pygargus or red knot or great knot  
 20 or calidris or canutus or godwit or limosa or lapponica or meleagris or gallopavo or jackdaw or  
 21 corvus or monedula or ruff or philomachus or pugnax or lapwing or peewit or plover or  
 22 vanellus or swan or cygnus or columbianus or bewickii or gull or chroicocephalus or  
 23 ridibundus or albifrons or great tit or parus or aythya or fuligula or streptopelia or risoria or  
 24 spoonbill or platalea or leucorodia or blackbird or turdus or merula or blue tit or cyanistes or  
 25 pigeon or pigeons or columba or pintail or anas or starling or sturnus or owl or athene noctua  
 26 or pochard or ferina or cockatiel or nymphicus or hollandicus or skylark or alauda or tern or  
 27 sterna or teal or crecca or oystercatcher or haematopus or ostralegus or shrew or shrews or  
 28 sorex or araneus or crocidura or russula or european mole or talpa or chiroptera or bat or bats  
 29 or eptesicus or serotinus or myotis or dasycneme or daubentonii or pipistrelle or pipistrellus or  
 30 cat or cats or felis or catus or feline or dog or dogs or canis or canine or canines or otter or  
 31 otters or lutra or badger or badgers or meles or fitchew or fitch or fougart or foulmart or  
 32 ferrets or ferret or polecat or polecats or mustela or putorius or weasel or weasels or fox or  
 33 foxes or vulpes or common seal or phoca or vitulina or grey seal or halichoerus or horse or  
 34 horses or equus or equine or equidae or donkey or donkeys or mule or mules or pig or pigs or  
 35 swine or swines or hog or hogs or boar or boars or porcine or piglet or piglets or sus or scrofa  
 36 or llama or llamas or lama or glama or deer or deers or cervus or elaphus or cow or cows or  
 37 bos taurus or bos indicus or bovine or bull or bulls or cattle or bison or bisons or sheep or  
 38 sheeps or ovis aries or ovine or lamb or lambs or mouflon or mouflons or goat or goats or  
 39 capra or caprine or chamois or rupicapra or leporidae or lagomorpha or lagomorph or rabbit or  
 40 rabbits or oryctolagus or cuniculus or laprine or hares or lepus or rodentia or rodent or rodents  
 41 or murinae or mouse or mice or mus or musculus or murine or woodmouse or apodemus or rat  
 42 or rats or rattus or norvegicus or guinea pig or guinea pigs or cavia or porcellus or hamster or  
 43 hamsters or mesocricetus or cricetus or cricetus or gerbil or gerbils or jird or jirds or  
 44 meriones or unguiculatus or jerboa or jerboas or jaculus or chinchilla or chinchillas or beaver  
 45 or beavers or castor fiber or castor canadensis or sciuridae or squirrel or squirrels or sciurus or  
 46 chipmunk or chipmunks or marmot or marmots or marmota or suslik or susliks or  
 47 spermophilus or cynomys or cottonrat or cottonrats or sigmodon or vole or voles or microtus  
 48 or myodes or glareolus or primate or primates or prosimian or prosimians or lemur or lemurs  
 49 or lemuridae or loris or bush baby or bush babies or bushbaby or bushbabies or galago or  
 50 galagos or anthropoidea or anthropoids or simian or simians or monkey or monkeys or

|     |                                                                                                                                                                                                                                                                                                                                                                                                                                                                                                                                                                                                                                                                                                                                                                                                                                                                                                               |       |
|-----|---------------------------------------------------------------------------------------------------------------------------------------------------------------------------------------------------------------------------------------------------------------------------------------------------------------------------------------------------------------------------------------------------------------------------------------------------------------------------------------------------------------------------------------------------------------------------------------------------------------------------------------------------------------------------------------------------------------------------------------------------------------------------------------------------------------------------------------------------------------------------------------------------------------|-------|
|     | marmoset or marmosets or callithrix or cebuella or tamarin or tamarins or saguinus or leontopithecus or squirrel monkey or squirrel monkeys or saimiri or night monkey or night monkeys or owl monkey or owl monkeys or douroucoulis or aotus or spider monkey or spider monkeys or ateles or baboon or baboons or papio or rhesus monkey or macaque or macaca or mulatta or cynomolgus or fascicularis or green monkey or green monkeys or chlorocebus or vervet or vervets or pygerythrus or hominoidea or ape or apes or hylobatidae or gibbon or gibbons or siamang or siamangs or nomascus or symphalangus or hominidae or orangutan or orangutans or pongo or chimpanzee or chimpanzees or pan troglodytes or bonobo or bonobos or pan paniscus or gorilla or gorillas or troglodytes).ti,ab,kf.) not (human/ or (human\$ or man or men or woman or women or child or children or patient\$).ti,ab,kf.) |       |
| 21. | 19 not 20                                                                                                                                                                                                                                                                                                                                                                                                                                                                                                                                                                                                                                                                                                                                                                                                                                                                                                     | 48488 |
| 22. | limit 21 to yr="2017 -Current"                                                                                                                                                                                                                                                                                                                                                                                                                                                                                                                                                                                                                                                                                                                                                                                                                                                                                | 15342 |



**Appendix 3: CINAHL (EbscoHOST) search strategy**

|     |                                                                                                                                                                                                                                                                                                                                                                                                                                                                                                                                                                                                                                                                                                                                                                            |        |
|-----|----------------------------------------------------------------------------------------------------------------------------------------------------------------------------------------------------------------------------------------------------------------------------------------------------------------------------------------------------------------------------------------------------------------------------------------------------------------------------------------------------------------------------------------------------------------------------------------------------------------------------------------------------------------------------------------------------------------------------------------------------------------------------|--------|
| 1.  | (MH "early detection of cancer")                                                                                                                                                                                                                                                                                                                                                                                                                                                                                                                                                                                                                                                                                                                                           | 9365   |
| 2.  | TI (cancer* OR tumo#r* OR neoplasm* OR malignan* OR metasta* OR oncogen* OR oncolog*)                                                                                                                                                                                                                                                                                                                                                                                                                                                                                                                                                                                                                                                                                      | 382286 |
| 3.  | TI (carcinoma* OR adenoma* OR adenocarcinoma* OR blastoma* OR carcinosarcoma* OR leukemia* OR leukaemia* OR lymphoma* OR melanoma* OR mesenchymoma* OR mesothelioma* OR sarcoma* OR thymoma*)                                                                                                                                                                                                                                                                                                                                                                                                                                                                                                                                                                              | 110746 |
| 4.  | S2 OR S3                                                                                                                                                                                                                                                                                                                                                                                                                                                                                                                                                                                                                                                                                                                                                                   | 469442 |
| 5.  | S1 OR S4                                                                                                                                                                                                                                                                                                                                                                                                                                                                                                                                                                                                                                                                                                                                                                   | 471736 |
| 6.  | (MH "early diagnosis") OR (MH "diagnosis, delayed")                                                                                                                                                                                                                                                                                                                                                                                                                                                                                                                                                                                                                                                                                                                        | 14703  |
| 7.  | ( TI (prediagnos* OR "pre-diagnosis" OR (care N1 path#) OR (cancer N1 path#) OR (care N1 pathway*) OR (cancer N1 pathway*) OR (diagnos* N1 phase*) OR (diagnos* N1 path#) OR (referral N1 path#) OR (diagnos* N1 pathway*) OR (referral N1 pathway*) OR (diagnos* N1 interval*) OR (referral N1 interval*) OR (consult* N1 interval*) OR "time-to-treat" OR "time-to-treatment") ) OR ( AB (prediagnos* OR "pre-diagnosis" OR (care N1 path#) OR (cancer N1 path#) OR (care N1 pathway*) OR (cancer N1 pathway*) OR (diagnos* N1 phase*) OR (diagnos* N1 path#) OR (referral N1 path#) OR (diagnos* N1 pathway*) OR (referral N1 pathway*) OR (diagnos* N1 interval*) OR (referral N1 interval*) OR (consult* N1 interval*) OR "time-to-treat" OR "time-to-treatment") ) ) | 11308  |
| 8.  | (TI ((early OR earlier OR prompt* OR late OR later OR rapid OR wait* OR delay* OR timel* OR longtime OR interval* OR route*) N3 (diagnos* OR refer OR referred OR referral* OR referring OR consult*)) OR (AB ((early OR earlier OR prompt* OR late OR later OR rapid OR wait* OR delay* OR timel* OR longtime OR interval* OR route*) N3 (diagnos* OR refer OR referred OR referral* OR referring OR consult*)))                                                                                                                                                                                                                                                                                                                                                          | 47662  |
| 9.  | (TI ((diagnos* OR confirm* OR refer* OR consult* OR investigat*) N4 (timelapse* OR (time N1 lapse*) OR (time N1 elapse*) OR fasttrack* OR (fast N1 track*) OR timeline* OR (time N1 line*))) OR (AB ((diagnos* OR confirm* OR refer* OR consult* OR investigat*) N4 (timelapse* OR (time N1 lapse*) OR (time N1 elapse*) OR fasttrack* OR (fast N1 track*) OR timeline* OR (time N1 line*))))                                                                                                                                                                                                                                                                                                                                                                              | 582    |
| 10. | TI delay*                                                                                                                                                                                                                                                                                                                                                                                                                                                                                                                                                                                                                                                                                                                                                                  | 17790  |
| 11. | (TI (wait* N1 time*)) OR (AB (wait* N1 time*))                                                                                                                                                                                                                                                                                                                                                                                                                                                                                                                                                                                                                                                                                                                             | 6047   |
| 12. | S6 OR S7 OR S8 OR S9 OR S10 OR S11                                                                                                                                                                                                                                                                                                                                                                                                                                                                                                                                                                                                                                                                                                                                         | 88476  |
| 13. | S4 AND S12                                                                                                                                                                                                                                                                                                                                                                                                                                                                                                                                                                                                                                                                                                                                                                 | 13005  |
| 14. | (TI diagnos*) OR (AB diagnos*)                                                                                                                                                                                                                                                                                                                                                                                                                                                                                                                                                                                                                                                                                                                                             | 526863 |
| 15. | S13 AND (S1 OR S14)                                                                                                                                                                                                                                                                                                                                                                                                                                                                                                                                                                                                                                                                                                                                                        | 9687   |
| 16. | TI (interprofessional* OR (inter N1 professional*) OR multidisciplin* OR (multi N1 disciplin*) OR navigator* OR coordinator* OR ordinator* OR ((patient* OR cancer* OR care) N2 (navigat* OR coordinat* OR ordinat* OR journey* OR continuum*)) OR mobile OR phone* OR smartphone* OR reminder* OR tele* OR (information N1 technolog*) OR communicat*)                                                                                                                                                                                                                                                                                                                                                                                                                    | 94165  |
| 17. | S16 AND S5                                                                                                                                                                                                                                                                                                                                                                                                                                                                                                                                                                                                                                                                                                                                                                 | 5442   |
| 18. | S15 OR S17                                                                                                                                                                                                                                                                                                                                                                                                                                                                                                                                                                                                                                                                                                                                                                 | 14982  |
| 19. | S18 Limiters - English Language                                                                                                                                                                                                                                                                                                                                                                                                                                                                                                                                                                                                                                                                                                                                            | 14767  |
| 20. | ((MH "animals+") OR (MH invertebrates+) OR (MH birds+) OR (MH fish) OR (MH "frogs and toads") OR (MH "animals, genetically modified") OR (MH reptiles+) OR (MH mammals) OR (MH bats) OR (MH camels) OR (MH cats) OR (MH cattle) OR (MH dogs) OR (MH dolphins) OR (MH goats) OR (MH horses) OR (MH rabbits) OR (MH rodents+) OR (MH                                                                                                                                                                                                                                                                                                                                                                                                                                         | 216053 |

1  
 2  
 3  
 4 sheep) OR (MH swine) OR (MH primates) OR (animal OR animals OR pisces OR fish OR  
 5 fishes OR catfish OR catfishes OR sheatfish OR silurus OR arius OR heteropneustes OR  
 6 clarias OR gariepinus OR "fathead minnow" OR "fathead minnows" OR pimephales OR  
 7 promelas OR cichlidae OR trout OR trouts OR char OR chars OR salvelinus OR salmo OR  
 8 oncorhynchus OR guppy OR guppies OR millionfish OR poecilia OR goldfish OR goldfishes  
 9 OR carassius OR auratus OR mullet OR mullets OR mugil OR curema OR shark OR sharks  
 10 OR cod OR cods OR gadus OR morhua OR carp OR carps OR cyprinus OR carpio OR  
 11 killifish OR eel OR eels OR anguilla OR zander OR sander OR lucioperca OR stizostedion  
 12 OR turbot OR turbots OR psetta OR flatfish OR flatfishes OR plaice OR pleuronectes OR  
 13 platessa OR tilapia OR tilapias OR oreochromis OR sarotherodon OR "common sole" OR  
 14 "dover sole" OR solea OR zebrafish OR zebrafishes OR danio OR rerio OR seabass OR  
 15 dicentrarchus OR labrax OR morone OR lamprey OR lampreys OR petromyzon OR  
 16 pumpkinseed OR pumpkinseeds OR lepomis OR gibbosus OR herring OR clupea OR  
 17 harengus OR amphibia OR amphibian OR amphibians OR anura OR salientia OR frog OR  
 18 frogs OR rana OR toad OR toads OR bufo OR xenopus OR laevis OR bombina OR epidalea  
 19 OR calamita OR salamander OR salamanders OR newt OR newts OR triturus OR reptilia OR  
 20 reptile OR reptiles OR "bearded dragon" OR pogona OR vitticeps OR iguana OR iguanas OR  
 21 lizard OR lizards OR "anguis fragilis" OR turtle OR turtles OR snakes OR snake OR aves OR  
 22 bird OR birds OR quail OR quails OR coturnix OR bobwhite OR colinus OR virginianus OR  
 23 poultry OR poultries OR fowl OR fowls OR chicken OR chickens OR gallus OR "zebra  
 24 finch" OR taeniopygia OR guttata OR canary OR canaries OR serinus OR canaria OR  
 25 parakeet OR parakeets OR grasskeet OR parrot OR parrots OR psittacine OR psittacines OR  
 26 shelduck OR tadorna OR goose OR geese OR branta OR leucopsis OR woodlark OR lullula  
 27 OR flycatcher OR ficedula OR hypoleuca OR dove OR doves OR geopelia OR cuneata OR  
 28 duck OR ducks OR greylag OR graylag OR anser OR harrier OR circus pygargus OR red knot  
 29 OR "great knot" OR calidris OR canutus OR godwit OR limosa OR lapponica OR meleagris  
 30 OR gallopavo OR jackdaw OR corvus OR monedula OR ruff OR philomachus OR pugnax  
 31 OR lapwing OR peewit OR plover OR vanellus OR swan OR cygnus OR columbianus OR  
 32 bewickii OR gull OR chroicocephalus OR ridibundus OR albifrons OR "great tit" OR parus  
 33 OR aythya OR fuligula OR streptopelia OR risoria OR spoonbill OR platalea OR leucorodia  
 34 OR blackbird OR turdus OR merula OR blue tit OR cyanistes OR pigeon OR pigeons OR  
 35 columba OR pintail OR anas OR starling OR sturnus OR owl OR "athene noctua" OR  
 36 pochard OR ferina OR cockatiel OR nymphicus OR hollandicus OR skylark OR alauda OR  
 37 tern OR sterna OR teal OR crecca OR oystercatcher OR haematopus OR ostralegus OR shrew  
 38 OR shrews OR sorex OR araneus OR crocidura OR russula OR "european mole" OR talpa  
 39 OR chiroptera OR bat OR bats OR eptesicus OR serotinus OR myotis OR dasycneme OR  
 40 daubentonii OR pipistrelle OR pipistrellus OR cat OR cats OR felis OR catus OR feline OR  
 41 dog OR dogs OR canis OR canine OR canines OR otter OR otters OR lutra OR badger OR  
 42 badgers OR meles OR fitchew OR fitch OR fougart OR foulmart OR ferrets OR ferret OR  
 43 polecat OR polecats OR mustela OR putorius OR weasel OR weasels OR fox OR foxes OR  
 44 vulpes OR "common seal" OR phoca OR vitulina OR grey seal OR halichoerus OR horse OR  
 45 horses OR equus OR equine OR equidae OR donkey OR donkeys OR mule OR mules OR pig  
 46 OR pigs OR swine OR swines OR hog OR hogs OR boar OR boars OR porcine OR piglet OR  
 47 piglets OR sus OR scrofa OR llama OR llamas OR lama OR glama OR deer OR deers OR  
 48 cervus OR elaphus OR cow OR cows OR "bos taurus" OR "bos indicus" OR bovine OR bull  
 49 OR bulls OR cattle OR bison OR bisons OR sheep OR sheeps OR "ovis aries" OR ovine OR  
 50 lamb OR lambs OR mouflon OR mouflons OR goat OR goats OR capra OR caprine OR  
 51 chamois OR rupicapra OR leporidae OR lagomorpha OR lagomorph OR rabbit OR rabbits  
 52 OR oryctolagus OR cuniculus OR laprine OR hares OR lepus OR rodentia OR rodent OR  
 53 rodents OR murinae OR mouse OR mice OR mus OR musculus OR murine OR woodmouse  
 54  
 55  
 56  
 57  
 58  
 59  
 60

|     |                                                                                                                                                                                                                                                                                                                                                                                                                                                                                                                                                                                                                                                                                                                                                                                                                                                                                                                                                                                                                                                                                                                                                                                                                                                                                                                                                                                                                                                                                                                                                                                                                                                                                                                                                                                               |       |
|-----|-----------------------------------------------------------------------------------------------------------------------------------------------------------------------------------------------------------------------------------------------------------------------------------------------------------------------------------------------------------------------------------------------------------------------------------------------------------------------------------------------------------------------------------------------------------------------------------------------------------------------------------------------------------------------------------------------------------------------------------------------------------------------------------------------------------------------------------------------------------------------------------------------------------------------------------------------------------------------------------------------------------------------------------------------------------------------------------------------------------------------------------------------------------------------------------------------------------------------------------------------------------------------------------------------------------------------------------------------------------------------------------------------------------------------------------------------------------------------------------------------------------------------------------------------------------------------------------------------------------------------------------------------------------------------------------------------------------------------------------------------------------------------------------------------|-------|
|     | <p>OR apodemus OR rat OR rats OR rattus OR norvegicus OR "guinea pig" OR "guinea pigs" OR cavia OR porcellus OR hamster OR hamsters OR mesocricetus OR cricetus OR gerbil OR gerbils OR jird OR jirds OR meriones OR unguiculatus OR jerboa OR jerboas OR jaculus OR chinchilla OR chinchillas OR beaver OR beavers OR "castor fiber" OR "castor canadensis" OR sciuridae OR squirrel OR squirrels OR sciurus OR chipmunk OR chipmunks OR marmot OR marmots OR marmota OR suslik OR susliks OR spermophilus OR cynomys OR cottonrat OR cottonrats OR sigmodon OR vole OR voles OR microtus OR myodes OR glareolus OR primate OR primates OR prosimian OR prosimians OR lemur OR lemurs OR lemuridae OR loris OR "bush baby" OR "bush babies" OR bushbaby OR bushbabies OR galago OR galagos OR anthropoidea OR anthropoids OR simian OR simians OR monkey OR monkeys OR marmoset OR marmosets OR callithrix OR cebuella OR tamarin OR tamarins OR saguinus OR leontopithecus OR squirrel monkey OR squirrel monkeys OR saimiri OR "night monkey" OR "night monkeys" OR "owl monkey" OR "owl monkeys" OR douroucoulis OR aotus OR "spider monkey" OR "spider monkeys" OR ateles OR baboon OR baboons OR papio OR "rhesus monkey" OR macaque OR macaca OR mulatta OR cynomolgus OR fascicularis OR "green monkey" OR "green monkeys" OR chlorocebus OR vervet OR vervets OR pygerythrus OR hominoidea OR ape OR apes OR hylobatidae OR gibbon OR gibbons OR siamang OR siamangs OR nomascus OR symphalangus OR hominidae OR orangutan OR orangutans OR pongo OR chimpanzee OR chimpanzees OR "pan troglodytes" OR bonobo OR bonobos OR "pan paniscus" OR gorilla OR gorillas OR troglodytes)) NOT ((MH human) OR (human# OR man OR men OR woman OR women OR child OR children OR patient#))</p> |       |
| 21. | S19 NOT S20                                                                                                                                                                                                                                                                                                                                                                                                                                                                                                                                                                                                                                                                                                                                                                                                                                                                                                                                                                                                                                                                                                                                                                                                                                                                                                                                                                                                                                                                                                                                                                                                                                                                                                                                                                                   | 14678 |
| 22. | S21 Limiters - Published Date: 20170101-20201231                                                                                                                                                                                                                                                                                                                                                                                                                                                                                                                                                                                                                                                                                                                                                                                                                                                                                                                                                                                                                                                                                                                                                                                                                                                                                                                                                                                                                                                                                                                                                                                                                                                                                                                                              | 5333  |

**Appendix 4: Psycinfo (Ovid) search strategy**

|     |                                                                                                                                                                                                                                                                                                                                                                                                                                                                                                                                                                                                                                                                                                                                                                                                                                                                                                                                                                                                                                                                                                                                                                                                                                                                                                                                                                                                                                                                                                                                                                                                                                                                                  |        |
|-----|----------------------------------------------------------------------------------------------------------------------------------------------------------------------------------------------------------------------------------------------------------------------------------------------------------------------------------------------------------------------------------------------------------------------------------------------------------------------------------------------------------------------------------------------------------------------------------------------------------------------------------------------------------------------------------------------------------------------------------------------------------------------------------------------------------------------------------------------------------------------------------------------------------------------------------------------------------------------------------------------------------------------------------------------------------------------------------------------------------------------------------------------------------------------------------------------------------------------------------------------------------------------------------------------------------------------------------------------------------------------------------------------------------------------------------------------------------------------------------------------------------------------------------------------------------------------------------------------------------------------------------------------------------------------------------|--------|
| 1.  | cancer screening/                                                                                                                                                                                                                                                                                                                                                                                                                                                                                                                                                                                                                                                                                                                                                                                                                                                                                                                                                                                                                                                                                                                                                                                                                                                                                                                                                                                                                                                                                                                                                                                                                                                                | 4776   |
| 2.  | (cancer* or tumor* or neoplasm* or malignan* or metasta* or oncogen* or oncolog*).ti                                                                                                                                                                                                                                                                                                                                                                                                                                                                                                                                                                                                                                                                                                                                                                                                                                                                                                                                                                                                                                                                                                                                                                                                                                                                                                                                                                                                                                                                                                                                                                                             | 44464  |
| 3.  | (carcinoma* or adenoma* or adenocarcinoma* or adeno-carcinoma* or blastoma* or carcinosarcoma* or carcino-sarcoma* or leukemia* or leukaemia* or lymphoma* or melanoma* or mesenchymoma* or mesothelioma* or sarcoma* or thymoma*).ti                                                                                                                                                                                                                                                                                                                                                                                                                                                                                                                                                                                                                                                                                                                                                                                                                                                                                                                                                                                                                                                                                                                                                                                                                                                                                                                                                                                                                                            | 2705   |
| 4.  | or/2-3                                                                                                                                                                                                                                                                                                                                                                                                                                                                                                                                                                                                                                                                                                                                                                                                                                                                                                                                                                                                                                                                                                                                                                                                                                                                                                                                                                                                                                                                                                                                                                                                                                                                           | 46737  |
| 5.  | 1 or 4                                                                                                                                                                                                                                                                                                                                                                                                                                                                                                                                                                                                                                                                                                                                                                                                                                                                                                                                                                                                                                                                                                                                                                                                                                                                                                                                                                                                                                                                                                                                                                                                                                                                           | 47903  |
| 6.  | (prediagnos* or pre-diagnos* or care path? or cancer path? or care pathway* or cancer pathway* or diagnos* phase* or diagnos* path? or referral path? or diagnos* pathway* or referral pathway* or diagnos* interval* or referral interval* or consult* interval* or "time-to-treat" or "time-to-treatment").ti,ab,id.                                                                                                                                                                                                                                                                                                                                                                                                                                                                                                                                                                                                                                                                                                                                                                                                                                                                                                                                                                                                                                                                                                                                                                                                                                                                                                                                                           | 3896   |
| 7.  | ((early or earlier or prompt* or late or later or rapid or wait* or delay* or timel* or longtime or interval* or route*) adj3 (diagnos* or refer or referred or referral* or referring or consult*).ti,ab,id.                                                                                                                                                                                                                                                                                                                                                                                                                                                                                                                                                                                                                                                                                                                                                                                                                                                                                                                                                                                                                                                                                                                                                                                                                                                                                                                                                                                                                                                                    | 13853  |
| 8.  | ((diagnos* or confirm* or refer* or consult* or investigat*) adj4 (timelapse* or time lapse* or time elapse* or fasttrack* or fast-track* or timeline* or time line*).ti,ab                                                                                                                                                                                                                                                                                                                                                                                                                                                                                                                                                                                                                                                                                                                                                                                                                                                                                                                                                                                                                                                                                                                                                                                                                                                                                                                                                                                                                                                                                                      | 168    |
| 9.  | delay*.ti                                                                                                                                                                                                                                                                                                                                                                                                                                                                                                                                                                                                                                                                                                                                                                                                                                                                                                                                                                                                                                                                                                                                                                                                                                                                                                                                                                                                                                                                                                                                                                                                                                                                        | 14212  |
| 10. | wait* time*.ti,ab.                                                                                                                                                                                                                                                                                                                                                                                                                                                                                                                                                                                                                                                                                                                                                                                                                                                                                                                                                                                                                                                                                                                                                                                                                                                                                                                                                                                                                                                                                                                                                                                                                                                               | 1957   |
| 11. | or/6-10                                                                                                                                                                                                                                                                                                                                                                                                                                                                                                                                                                                                                                                                                                                                                                                                                                                                                                                                                                                                                                                                                                                                                                                                                                                                                                                                                                                                                                                                                                                                                                                                                                                                          | 33241  |
| 12. | 4 and 11                                                                                                                                                                                                                                                                                                                                                                                                                                                                                                                                                                                                                                                                                                                                                                                                                                                                                                                                                                                                                                                                                                                                                                                                                                                                                                                                                                                                                                                                                                                                                                                                                                                                         | 1613   |
| 13. | diagnos*.ti,ab,id                                                                                                                                                                                                                                                                                                                                                                                                                                                                                                                                                                                                                                                                                                                                                                                                                                                                                                                                                                                                                                                                                                                                                                                                                                                                                                                                                                                                                                                                                                                                                                                                                                                                | 324967 |
| 14. | 12 and (1 or 13)                                                                                                                                                                                                                                                                                                                                                                                                                                                                                                                                                                                                                                                                                                                                                                                                                                                                                                                                                                                                                                                                                                                                                                                                                                                                                                                                                                                                                                                                                                                                                                                                                                                                 | 1345   |
| 15. | (interprofessional* or inter-professional* or multidisciplin* or multi-disciplin* or navigator* or coordinator* or co-ordinator* or ((patient* or cancer* or care) adj2 (navigat* or coordinat* or co-ordinat* or journey* or continuum*)) or mobile or phone* or smartphone* or reminder* or tele* or information technolog* or communicat*).ti                                                                                                                                                                                                                                                                                                                                                                                                                                                                                                                                                                                                                                                                                                                                                                                                                                                                                                                                                                                                                                                                                                                                                                                                                                                                                                                                 | 81166  |
| 16. | 15 and 5                                                                                                                                                                                                                                                                                                                                                                                                                                                                                                                                                                                                                                                                                                                                                                                                                                                                                                                                                                                                                                                                                                                                                                                                                                                                                                                                                                                                                                                                                                                                                                                                                                                                         | 1650   |
| 17. | 14 or 16                                                                                                                                                                                                                                                                                                                                                                                                                                                                                                                                                                                                                                                                                                                                                                                                                                                                                                                                                                                                                                                                                                                                                                                                                                                                                                                                                                                                                                                                                                                                                                                                                                                                         | 2949   |
| 18. | limit 17 to english language                                                                                                                                                                                                                                                                                                                                                                                                                                                                                                                                                                                                                                                                                                                                                                                                                                                                                                                                                                                                                                                                                                                                                                                                                                                                                                                                                                                                                                                                                                                                                                                                                                                     | 2756   |
| 19. | (exp animal research/ or animal models/ or exp animals/ or ("20").po or (animal or animals or pisces or fish or fishes or catfish or catfishes or sheatfish or silurus or arius or heteropneustes or clarias or gariepinus or fathead minnow or fathead minnows or pimephales or promelas or cichlidae or trout or trouts or char or chars or salvelinus or salmo or oncorhynchus or guppy or guppies or millionfish or poecilia or goldfish or goldfishes or carassius or auratus or mullet or mullets or mugil or curema or shark or sharks or cod or cods or gadus or morhua or carp or carps or cyprinus or carpio or killifish or eel or eels or anguilla or zander or sander or lucioperca or stizostedion or turbot or turbots or psetta or flatfish or flatfishes or plaice or pleuronectes or platessa or tilapia or tilapias or oreochromis or sarotherodon or common sole or dover sole or solea or zebrafish or zebrafishes or danio or rerio or seabass or dicentrarchus or labrax or morone or lamprey or lampreys or petromyzon or pumpkinseed or pumpkinseeds or lepomis or gibbosus or herring or clupea or harengus or amphibia or amphibian or amphibians or anura or salientia or frog or frogs or rana or toad or toads or bufo or xenopus or laevis or bombina or epidalea or calamita or salamander or salamanders or newt or newts or triturus or reptilia or reptile or reptiles or bearded dragon or pogona or vitticeps or iguana or iguanas or lizard or lizards or anguis fragilis or turtle or turtles or snakes or snake or aves or bird or birds or quail or quails or coturnix or bobwhite or colinus or virginianus or poultry or poultries or | 339315 |

|     |                                                                                                                                                                                                                                                                                                                                                                                                                                                                                                                                                                                                                                                                                                                                                                                                                                                                                                                                                                                                                                                                                                                                                                                                                                                                                                                                                                                                                                                                                                                                                                                                                                                                                                                                                                                                                                                                                                                                                                                                                                                                                                                                                                                                                                                                                                                                                                                                                                                                                                                                                                                                                                                                                                                                                                                                                                                                                                                                                                                                                                                                                                                                                                                                                                                                                                                                                                                                                                                                                                                                                                                                                                                                                                                                                                                                                                                                                                                                                                                                                                                                                                                                                                                                                                                                                                                                                                                                                    |      |
|-----|--------------------------------------------------------------------------------------------------------------------------------------------------------------------------------------------------------------------------------------------------------------------------------------------------------------------------------------------------------------------------------------------------------------------------------------------------------------------------------------------------------------------------------------------------------------------------------------------------------------------------------------------------------------------------------------------------------------------------------------------------------------------------------------------------------------------------------------------------------------------------------------------------------------------------------------------------------------------------------------------------------------------------------------------------------------------------------------------------------------------------------------------------------------------------------------------------------------------------------------------------------------------------------------------------------------------------------------------------------------------------------------------------------------------------------------------------------------------------------------------------------------------------------------------------------------------------------------------------------------------------------------------------------------------------------------------------------------------------------------------------------------------------------------------------------------------------------------------------------------------------------------------------------------------------------------------------------------------------------------------------------------------------------------------------------------------------------------------------------------------------------------------------------------------------------------------------------------------------------------------------------------------------------------------------------------------------------------------------------------------------------------------------------------------------------------------------------------------------------------------------------------------------------------------------------------------------------------------------------------------------------------------------------------------------------------------------------------------------------------------------------------------------------------------------------------------------------------------------------------------------------------------------------------------------------------------------------------------------------------------------------------------------------------------------------------------------------------------------------------------------------------------------------------------------------------------------------------------------------------------------------------------------------------------------------------------------------------------------------------------------------------------------------------------------------------------------------------------------------------------------------------------------------------------------------------------------------------------------------------------------------------------------------------------------------------------------------------------------------------------------------------------------------------------------------------------------------------------------------------------------------------------------------------------------------------------------------------------------------------------------------------------------------------------------------------------------------------------------------------------------------------------------------------------------------------------------------------------------------------------------------------------------------------------------------------------------------------------------------------------------------------------------------------------|------|
|     | <p>fowl or fowls or chicken or chickens or gallus or zebra finch or taeniopygia or guttata or canary or canaries or serinus or canaria or parakeet or parakeets or grasskeet or parrot or parrots or psittacine or psittacines or shelduck or tadorna or goose or geese or branta or leucopsis or woodlark or lullula or flycatcher or ficedula or hypoleuca or dove or doves or geopelia or cuneata or duck or ducks or greylag or graylag or anser or harrier or circus pygargus or red knot or great knot or calidris or canutus or godwit or limosa or lapponica or meleagris or gallopavo or jackdaw or corvus or monedula or ruff or philomachus or pugnax or lapwing or peewit or plover or vanellus or swan or cygnus or columbianus or bewickii or gull or chroicocephalus or ridibundus or albifrons or great tit or parus or aythya or fuligula or streptopelia or risoria or spoonbill or platalea or leucorodia or blackbird or turdus or merula or blue tit or cyanistes or pigeon or pigeons or columba or pintail or anas or starling or sturnus or owl or athene noctua or pochard or ferina or cockatiel or nymphicus or hollandicus or skylark or alauda or tern or sterna or teal or crecca or oystercatcher or haematopus or ostralegus or shrew or shrews or sorex or araneus or crocidura or russula or european mole or talpa or chiroptera or bat or bats or eptesicus or serotinus or myotis or dasyncneme or daubentonii or pipistrelle or pipistrellus or cat or cats or felis or catus or feline or dog or dogs or canis or canine or canines or otter or otters or lutra or badger or badgers or meles or fitchew or fitch or fougart or foulmart or ferrets or ferret or polecat or polecats or mustela or putorius or weasel or weasels or fox or foxes or vulpes or common seal or phoca or vitulina or grey seal or halichoerus or horse or horses or equus or equine or equidae or donkey or donkeys or mule or mules or pig or pigs or swine or swines or hog or hogs or boar or boars or porcine or piglet or piglets or sus or scrofa or llama or llamas or lama or glama or deer or deers or cervus or elaphus or cow or cows or bos taurus or bos indicus or bovine or bull or bulls or cattle or bison or bisons or sheep or sheeps or ovis aries or ovine or lamb or lambs or mouflon or mouflons or goat or goats or capra or caprine or chamois or rupicapra or leporidae or lagomorpha or lagomorph or rabbit or rabbits or oryctolagus or cuniculus or laprine or hares or lepus or rodentia or rodent or rodents or murinae or mouse or mice or mus or musculus or murine or woodmouse or apodemus or rat or rats or rattus or norvegicus or guinea pig or guinea pigs or cavia or porcellus or hamster or hamsters or mesocricetus or cricetus or gerbil or gerbils or jird or jirds or meriones or unguiculatus or jerboa or jerboas or jaculus or chinchilla or chinchillas or beaver or beavers or castor fiber or castor canadensis or sciuridae or squirrel or squirrels or sciurus or chipmunk or chipmunks or marmot or marmots or marmota or suslik or susliks or spermophilus or cynomys or cottonrat or cottonrats or sigmodon or vole or voles or microtus or myodes or glareolus or primate or primates or prosimian or prosimians or lemur or lemurs or lemuridae or loris or bush baby or bush babies or bushbaby or bushbabies or galago or galagos or anthropoidea or anthropoids or simian or simians or monkey or monkeys or marmoset or marmosets or callithrix or cebuella or tamarin or tamarins or saguinus or leontopithecus or squirrel monkey or squirrel monkeys or saimiri or night monkey or night monkeys or owl monkey or owl monkeys or douroucoulis or aotus or spider monkey or spider monkeys or ateles or baboon or baboons or papio or rhesus monkey or macaque or macaca or mulatta or cynomolgus or fascicularis or green monkey or green monkeys or chlorocebus or vervet or vervets or pygerythrus or hominoidea or ape or apes or hylobatidae or gibbon or gibbons or siamang or siamangs or nomascus or symphalangus or hominidae or orangutan or orangutans or pongo or chimpanzee or chimpanzees or pan troglodytes or bonobo or bonobos or pan paniscus or gorilla or gorillas or troglodytes).ti,ab,id.) not ("10").po or (human\$ or man or men or woman or women or child or children or patient\$).ti,ab,id.)</p> |      |
| 20. | 18 not 19                                                                                                                                                                                                                                                                                                                                                                                                                                                                                                                                                                                                                                                                                                                                                                                                                                                                                                                                                                                                                                                                                                                                                                                                                                                                                                                                                                                                                                                                                                                                                                                                                                                                                                                                                                                                                                                                                                                                                                                                                                                                                                                                                                                                                                                                                                                                                                                                                                                                                                                                                                                                                                                                                                                                                                                                                                                                                                                                                                                                                                                                                                                                                                                                                                                                                                                                                                                                                                                                                                                                                                                                                                                                                                                                                                                                                                                                                                                                                                                                                                                                                                                                                                                                                                                                                                                                                                                                          | 2754 |
| 21. | limit 20 to yr="2017 -Current"                                                                                                                                                                                                                                                                                                                                                                                                                                                                                                                                                                                                                                                                                                                                                                                                                                                                                                                                                                                                                                                                                                                                                                                                                                                                                                                                                                                                                                                                                                                                                                                                                                                                                                                                                                                                                                                                                                                                                                                                                                                                                                                                                                                                                                                                                                                                                                                                                                                                                                                                                                                                                                                                                                                                                                                                                                                                                                                                                                                                                                                                                                                                                                                                                                                                                                                                                                                                                                                                                                                                                                                                                                                                                                                                                                                                                                                                                                                                                                                                                                                                                                                                                                                                                                                                                                                                                                                     | 608  |



## Appendix 5: Websites of relevant organizations and professional bodies searched for literature

### Canada

- Alberta Cancer Foundation
- BC Cancer Foundation
- BC Cancer Agency
- Cancer Care Manitoba
- Cancer Care Nova Scotia
- Cancer Care Ontario
- CancerControl Alberta
- Canada Health Infoway
- Canadian Association of Nurses in Oncology
- Canadian Association of Psychosocial Oncology
- Canadian Cancer Society
- Canadian Foundation for Healthcare Improvement
- Canadian Foundation for Innovation
- Canadian Institutes of Health Research
- Cancer and Primary Care Research
- Cancer Quality Council of Ontario
- Cancerview.ca
- CanIMPACT
- College of Family Physicians of Canada
- International Network
- New Brunswick Cancer Network
- Ontario Institute for Cancer Research
- Quebec Health and Social Services (Direction québécoise de cancérologie, Ministère de la Santé et des Services sociaux)
- Royal College of Physicians and Surgeons of Canada
- Saskatchewan Cancer Agency
- Trillium Health Partners

### International

- Association of Community Cancer Centres – USA
- Centers for Disease Control and Prevention – USA
- Commission on Cancer of the American College of Surgeons – USA
- Institute of Medicine – USA
- National Cancer Institute – USA
- National Comprehensive Cancer Network – USA
- Cancer Research UK (including the Accelerate, Coordinate, Evaluate Programme) – UK
- Kings Fund – UK
- National Health Service (NHS) – UK
- National Institute for Health and Care Excellence (NICE) – UK
- Northern Cancer Network – New Zealand
- Cancer Australia – Australia
- Sax Institute – Australia
- Denmark (Ministry of Health)
- Sweden (Ministry of Health)
- European Organization for Research and Treatment of Cancer – Europe
- European Society for Medical Oncology – Europe
- European Partnership Action Against Cancer – Europe
- World Health Organization – International

## Appendix 6: Definition for interventions related to the review questions

- *Centralized or coordinated diagnostic service*: Brings together various tests/procedures and care providers needed to determine a definitive diagnosis at one location.
- *Interventions in diagnostic services*: An initiative that aims to improve diagnostic services within a jurisdiction.
- *Multidisciplinary team*: Working with multiple departments, such as diagnostic imaging, pathology, medical oncology, and research.
- *Patient navigation*: A dedicated role to help facilitate the navigation for patients across the cancer journey – helps the patient through testing, appointments, health literacy, etc.
- *Rapid referral pathway*: Provides urgent access to specialists and/or diagnostic services for patients.
- *Remote or rural populations*: This refers to populations that may live in non-urban areas. They often do not have access to the same services as those who reside in more urban areas.
- *Standardized care pathway*: Sets expectations for cancer care based on evidence and shares information about how to provide and what care to provide at each point of diagnosis, treatment, and survivorship. Initiative is often integrated into the current health system.
- *Support for primary care providers*: Initiative focusing on educating and supporting primary care providers on care pathways and how to care for individuals presenting with potential or confirmed cancer symptoms.
- *Target or benchmark*: A figure used as a goal by jurisdictions to measure progress towards the desired outcome of an initiative.
- *Technology to support diagnosis process*: Technological innovations to enhance efficiency of initiatives.

**Appendix 7:** Summary of the characteristics of the included published articles that reported data on ineffective interventions

| <b>Interventions</b>                                | <b>Article</b>                | <b>Study country (Region)</b> | <b>Study type (Study years)</b> | <b>Cancer type (Population) [Sample size]</b>                | <b>Assessment metric</b>                                    | <b>Result</b>                                                                                                                                                                                                                                                   |
|-----------------------------------------------------|-------------------------------|-------------------------------|---------------------------------|--------------------------------------------------------------|-------------------------------------------------------------|-----------------------------------------------------------------------------------------------------------------------------------------------------------------------------------------------------------------------------------------------------------------|
| <b>Interventions to enhance diagnostic services</b> | Agnarsdottir 2019             | Sweden (Uppsala)              | Cross-sectional (2016-2018)     | Skin (Adult) [286]                                           | Reporting time                                              | The reporting time increased from 18 to 31 days for the non-priority cases and from 15 to 25 days for all cases with invasive melanomas (Ineffective)                                                                                                           |
|                                                     | McCutchan 2020                | UK (Wales)                    | Before-and-After (2016)         | Lung (Mixed age) [1011 (pre-campaign); 1013 (post-campaign)] | Urgent suspected referrals to specialist                    | There was no statistically significant change in urgent suspected cancer referrals (p = 0.82) in routes to diagnosis (Ineffective)                                                                                                                              |
| <b>Multidisciplinary team</b>                       | Largey 2020                   | Australia (Victoria)          | Before-and-After (2016-2017)    | Lung (Adult) [429]                                           | Time interval from referral to first specialist appointment | Referral to first specialist appointment interval was reduced in the post intervention period from median (IQR) 6 (0-15) to 4 (1-10) days, with no significant trend (p=0.962) (Ineffective)                                                                    |
|                                                     | Thalanayar Muthukrishnan 2020 | USA (Cleveland)               | Case-Control (2015-2017)        | Lung (NR) [161]                                              | Time interval from suspicion to diagnosis                   | The mean time intervals for imaging to staging (with standard deviations) were 65 days in controls (SD=42.67) and 75 days (SD=58.27) in tumor board cases (p=0.39) (Ineffective)                                                                                |
| <b>Interventions</b>                                | <b>Article</b>                | <b>Study country (Region)</b> | <b>Study type (Study years)</b> | <b>Cancer type (Population) [Sample size]</b>                | <b>Assessment metric</b>                                    | <b>Result</b>                                                                                                                                                                                                                                                   |
| <b>Rapid referral pathway</b>                       | Fallon 2019                   | UK (Luton)                    | Case-Control (2015-2017)        | Gastrointestinal (Adult) [509 (148 UGI; 361 LGI)]            | Stage of malignancy at time of presentation                 | Two weeks wait referral did not achieve an earlier diagnosis compared with non-2 week wait routes of referral in upper gastrointestinal ( $\chi^2(3)=2.6$ , $p=0.458$ ) and lower gastrointestinal ( $\chi^2(3)=0.884$ , $p=0.829$ ) malignancies (Ineffective) |
|                                                     | Jefferson 2019                | UK                            | Cross-sectional (2016-2018)     | Multiple (Adult) [24]                                        | Factors affecting patients' non-                            | The following were identified: system flaws; GP difficulties with booking                                                                                                                                                                                       |



|                                  |                |                               |                                 |                                               |                                                                        |                                                                                                                                                                                                                                                                                                              |
|----------------------------------|----------------|-------------------------------|---------------------------------|-----------------------------------------------|------------------------------------------------------------------------|--------------------------------------------------------------------------------------------------------------------------------------------------------------------------------------------------------------------------------------------------------------------------------------------------------------|
|                                  |                | (A Northern English city)     |                                 |                                               | attendance following referral                                          | appointments; patient difficulties with navigating the appointment system, patients leading ‘difficult lives’; and patients’ expectations of the referral, informed by their beliefs, circumstances, priorities, and the perceived prognosis (Ineffective)                                                   |
|                                  | Kassirian 2020 | Canada (London, Ontario)      | Cross-sectional (2017-2018)     | Ear, Nose and Throat (Adult) [102]            | Time from presentation to appointment at the multi-disciplinary clinic | The average time for patients to have their first appointment was 15.1 months, consisting of 3.9 months for patients to see a health care provider for the first time since symptom onset and 10.7 months from first appointment to being seen at the clinic – representing significant delays (Ineffective) |
|                                  | Neal 2017      | UK (Wales; Yorkshire)         | RCT (2012-2015)                 | Lung (Adult) [255]                            | Anxiety and depression scores                                          | There was no evidence of a difference in post-randomisation anxiety scores between trial arms (median (IQR): 6 (3–8) in control vs 5 (3–9) in intervention, z=0.32; P=0.75) (Ineffective)                                                                                                                    |
|                                  | Scott 2020     | UK (Countrywide)              | Case-Control (2009-2011)        | Multiple (Mixed age) [10314]                  | Cancer occurrence 5 years after negative diagnosis                     | 4.0% for those referred via pathway and 2.1% for those routinely referred (Ineffective)                                                                                                                                                                                                                      |
|                                  | Talwar 2020    | UK (Merseyside)               | Cross-sectional (2017-2019)     | Head and Neck (NR) [113]                      | Time from referral to being seen in hospital                           | The time taken from referral to being seen in hospital was a median (IQR) of 10 (6–13) days (range 1–28 days) with 11/110 (10%) exceeding 14 days (Ineffective)                                                                                                                                              |
| <b>Interventions</b>             | <b>Article</b> | <b>Study country (Region)</b> | <b>Study type (Study years)</b> | <b>Cancer type (Population) [Sample size]</b> | <b>Assessment metric</b>                                               | <b>Result</b>                                                                                                                                                                                                                                                                                                |
| <b>Standardized care pathway</b> | Almuammar 2019 | Saudi Arabia (Countrywide)    | Cross-sectional (2010-2012)     | Multiple (Adult) [20]                         | Patient satisfaction with GP in the pathway                            | Patients felt that GPs did not listen to them, and were likely to undermine the role of GPs as active practitioners in healthcare provision (Ineffective)                                                                                                                                                    |
|                                  | Gardner 2020   | UK (Edinburgh)                | Case-Control (2016-2018)        | Ear, Nose and Throat                          | Time from referral to diagnosis                                        | Patients referred by GP on the ‘urgent suspicion of cancer’ pathway were seen more quickly than those referred                                                                                                                                                                                               |

|                                           |                  |                               |                                 |                                                  |                                                                                 |                                                                                                                                                                                                                                |
|-------------------------------------------|------------------|-------------------------------|---------------------------------|--------------------------------------------------|---------------------------------------------------------------------------------|--------------------------------------------------------------------------------------------------------------------------------------------------------------------------------------------------------------------------------|
|                                           |                  |                               |                                 | (Mixed age)<br>[62]                              |                                                                                 | routinely were. However, these differences were not significant (Ineffective)                                                                                                                                                  |
|                                           | Iachina 2017     | Denmark (Countrywide)         | Case-Control (2008-2012)        | Lung (Adult) [11273]                             | Time from referral to end of primary investigation                              | Time from referral to the end of primary investigation did not significantly change (1.00 (0.93;1.08)) (Ineffective)                                                                                                           |
|                                           | Jensen 2017      | Denmark (Countrywide)         | Case-Control (2004-2010)        | Multiple (Adult) [7725]                          | Mortality                                                                       | When comparing pathway-referred patients against non-pathway-referred patients, non-significant lower excess mortality was observed among the pathway referred (excess hazard ratios = 0.86 (95% CI: 0.73;1.01)) (Ineffective) |
|                                           | Price 2020       | UK (National)                 | Cross-sectional (2006-2017)     | Multiple (Adult) [83935]                         | Diagnostic interval                                                             | Median New-NICE values were consistently longer (99, 40–212 in 2006 vs 103, 42–236 days in 2017) than Old-NICE values across all cancers (Ineffective)                                                                         |
| <b>Interventions</b>                      | <b>Article</b>   | <b>Study country (Region)</b> | <b>Study type (Study years)</b> | <b>Cancer type (Population) [Sample size]</b>    | <b>Assessment metric</b>                                                        | <b>Result</b>                                                                                                                                                                                                                  |
| <b>Support for primary care providers</b> | Evans 2018       | UK (Oxfordshire)              | Cross-sectional (2016-2017)     | Multiple (Adult) [NR]                            | GP perspectives on safety netting                                               | GPs revealed uncertainty about which aspects of clinical practice were considered safety netting (Ineffective)                                                                                                                 |
|                                           | Kidney 2017      | UK (Urban West Midlands)      | Cross-sectional (2014)          | Gastrointestinal (Adult) [NR]                    | Barriers for referral                                                           | A desire to avoid over-referral, lack of knowledge of guidelines, and the use of individually derived decision rules for further investigation or referral of symptoms (Ineffective)                                           |
|                                           | Zienius 2019     | UK (Scotland)                 | Cross-sectional (2010-2015)     | Brain (Adult) [2938]                             | Predictive value of referral guidelines for imaging where a tumour is suspected | With symptom-based referral guidelines, primary care doctors can identify patients with a 3% positive predictive value (Ineffective)                                                                                           |
|                                           | Di Girolamo 2018 | UK (England)                  | Cross-sectional (2009-2013)     | Multiple (Mixed age) [360643 (CRC) 164890, lung] | 1-year survival of patients                                                     | For 31-day and 62-day targets survival was worse for those for whom the targets were and were not met (Ineffective)                                                                                                            |

|                                                |                   |                                    |                                 |                                               |                                                       |                                                                                                                                                                                                                        |
|------------------------------------------------|-------------------|------------------------------------|---------------------------------|-----------------------------------------------|-------------------------------------------------------|------------------------------------------------------------------------------------------------------------------------------------------------------------------------------------------------------------------------|
|                                                |                   |                                    |                                 | 171208, ovarian<br>24545]                     |                                                       |                                                                                                                                                                                                                        |
| <b>Target or benchmark for wait times</b>      | Brian 2017        | New Zealand (Hamilton)             | Before-and-After (2016)         | Skin (Adult) [143]                            | Time to diagnosis                                     | Compliance with recommended time intervals was poor for patients referred with skin lesions suspicious for melanoma; from referral to diagnostic skin biopsy, compliance was 17.6% (Ineffective)                       |
|                                                | Venchairutti 2016 | Australia (New South Wales)        | Case-Control (2008-2013)        | Multiple (Adult) [224]                        | Time from symptom onset to diagnosis                  | Regional/remote patients had a longer interval from symptom onset to diagnosis (median 5.4 months [IQR 9.2 months]) compared with metropolitan patients (median 2.1 months [IQR 4.3 months]) (P = 0.002) (Ineffective) |
| <b>Interventions</b>                           | <b>Article</b>    | <b>Study country (Region)</b>      | <b>Study type (Study years)</b> | <b>Cancer type (Population) [Sample size]</b> | <b>Assessment metric</b>                              | <b>Result</b>                                                                                                                                                                                                          |
| <b>Technology to support diagnosis process</b> | Chung 2020        | Netherlands (Amsterdam; Rotterdam) | Cross-sectional (2017)          | Skin (Adult) [125]                            | Risk assessment performance                           | The inter-observer agreement between the ratings of the automated risk assessment and the dermatologist was poor (Ineffective)                                                                                         |
|                                                | Lau 2018          | UK (West Midlands and Berkshire)   | Case-Control (2009-2013)        | Multiple (Adult) [1005]                       | False-negative rate                                   | A sensitivity of 31% and specificity of 92% (Ineffective)                                                                                                                                                              |
|                                                | Pannebakker 2019  | UK (NR)                            | Cross-sectional (2016-2017)     | Skin (Adult) [14]                             | Patient perspectives on implementation and usefulness | No patients were aware that the electronic clinical decision support had been used during their consultation (Ineffective)                                                                                             |
|                                                | Walter 2020       | UK (Eastern England)               | RCT (2016-2017)                 | Skin (Adult) [238]                            | Time between first noticing a change and consultation | There were no statistically significant differences between trial groups on any of the secondary outcome measures (Ineffective)                                                                                        |

CRC = colorectal cancer; GP = general practitioner; LGI = upper gastrointestinal; NICE = National Institute for Health and Care Excellence; NR = not reported; RCT = randomized controlled trial; UGI = upper gastrointestinal; UK = United Kingdom; USA = United States of America; IQR = interquartile range

**Appendix 8:** Summary of the characteristics of the included published articles that reported data on remote or rural populations

| Article              | Study country (Region)        | Study type (Study years)     | Cancer type (Population) [Sample size] | Assessment metric                                   | Result                                                                                                                                                                                                    |
|----------------------|-------------------------------|------------------------------|----------------------------------------|-----------------------------------------------------|-----------------------------------------------------------------------------------------------------------------------------------------------------------------------------------------------------------|
| Chavarri-Guerra 2019 | Mexico (Mexico City)          | Before-and-After (2016-2017) | Multiple (Adult) [70]                  | Feasibility of patient navigation                   | All patients were from an under-served population. 91% of patients successfully obtained appointments at cancer centers in <3 months.                                                                     |
| Emery 2017           | Australia (Western Australia) | RCT (2011-2013)              | Multiple (Adult) [1358]                | Time to diagnosis                                   | All patients were from a rural population. There were no significant differences on the time to diagnosis with and without intervention.                                                                  |
| Murchie 2020         | UK (Scotland; England)        | Cross-sectional (2017)       | Multiple (Mixed age) [1314]            | Time from presentation in primary care to diagnosis | The median primary care interval was 5 days (IQR 0-23 days) and median diagnostic interval was 30 days (IQR 13-68). Diagnostic intervals were longer in the most remote patients.                         |
| Venchairutti 2016    | Australia (New South Wales)   | Case-Control (2008-2013)     | Multiple (Adult) [224]                 | Time from symptom onset to diagnosis                | Regional/remote patients had a longer interval from symptom onset to diagnosis (median 5.4 months [IQR 9.2 months]) compared with metropolitan patients (median 2.1 months [IQR 4.3 months]) (P = 0.002). |
| Yeşiler 2020         | Turkey (Ankara)               | Cross-sectional (2010-2011)  | Lung (Adult) [122]                     | Delay in diagnosis times                            | No significant difference in the mean duration from symptom onset to pathological diagnosis. No significant differences were identified based on patient residence.                                       |

UK = United Kingdom; IQR = interquartile range

**Appendix 9:** Summary of performance metrics to measure improvements in suspicion to diagnosis phase

| <b>Intervention Type</b>                      | <b>Performance Metric</b>                                                                                                                                                                                                                                                                                                                                                                                                                                                                                                                                                               |
|-----------------------------------------------|-----------------------------------------------------------------------------------------------------------------------------------------------------------------------------------------------------------------------------------------------------------------------------------------------------------------------------------------------------------------------------------------------------------------------------------------------------------------------------------------------------------------------------------------------------------------------------------------|
| Centralized or coordinated diagnostic service | <ul style="list-style-type: none"> <li>• Time from presentation in primary care to diagnosis</li> <li>• Time from referral from primary care to specialist consultation</li> <li>• Time from first abnormal image to biopsy</li> </ul>                                                                                                                                                                                                                                                                                                                                                  |
| Interventions to enhance diagnostic services  | <ul style="list-style-type: none"> <li>• Time from referral from primary care to specialist consultation</li> <li>• Time from initial specialist consultation to diagnosis</li> <li>• Time from initial specialist consultation to biopsy</li> <li>• Time from first abnormal image to biopsy</li> <li>• Time from presentation in primary care to biopsy</li> <li>• Total diagnostic interval</li> <li>• Turnaround time for diagnosis following histology</li> <li>• Number of urgent referrals to specialist</li> <li>• Cancer detection rate</li> <li>• Patient survival</li> </ul> |
| Multidisciplinary team                        | <ul style="list-style-type: none"> <li>• Time from referral from primary care to specialist consultation</li> <li>• Time from first abnormal image to diagnosis</li> </ul>                                                                                                                                                                                                                                                                                                                                                                                                              |
| Patient navigation                            | <ul style="list-style-type: none"> <li>• Waiting times from the point of referral from primary care to initial specialist assessment</li> <li>• Feasibility of program/process</li> <li>• Delays in diagnostic resolutions</li> </ul>                                                                                                                                                                                                                                                                                                                                                   |

## Preferred Reporting Items for Systematic reviews and Meta-Analyses extension for Scoping Reviews (PRISMA-ScR) Checklist

| SECTION                                               | ITEM | PRISMA-ScR CHECKLIST ITEM                                                                                                                                                                                                                                                                                  | REPORTED ON PAGE # |
|-------------------------------------------------------|------|------------------------------------------------------------------------------------------------------------------------------------------------------------------------------------------------------------------------------------------------------------------------------------------------------------|--------------------|
| <b>TITLE</b>                                          |      |                                                                                                                                                                                                                                                                                                            |                    |
| Title                                                 | 1    | Identify the report as a scoping review.                                                                                                                                                                                                                                                                   | 1                  |
| <b>ABSTRACT</b>                                       |      |                                                                                                                                                                                                                                                                                                            |                    |
| Structured summary                                    | 2    | Provide a structured summary that includes (as applicable): background, objectives, eligibility criteria, sources of evidence, charting methods, results, and conclusions that relate to the review questions and objectives.                                                                              | 4-5                |
| <b>INTRODUCTION</b>                                   |      |                                                                                                                                                                                                                                                                                                            |                    |
| Rationale                                             | 3    | Describe the rationale for the review in the context of what is already known. Explain why the review questions/objectives lend themselves to a scoping review approach.                                                                                                                                   | 7-8                |
| Objectives                                            | 4    | Provide an explicit statement of the questions and objectives being addressed with reference to their key elements (e.g., population or participants, concepts, and context) or other relevant key elements used to conceptualize the review questions and/or objectives.                                  | 8-9                |
| <b>METHODS</b>                                        |      |                                                                                                                                                                                                                                                                                                            |                    |
| Protocol and registration                             | 5    | Indicate whether a review protocol exists; state if and where it can be accessed (e.g., a Web address); and if available, provide registration information, including the registration number.                                                                                                             | 9                  |
| Eligibility criteria                                  | 6    | Specify characteristics of the sources of evidence used as eligibility criteria (e.g., years considered, language, and publication status), and provide a rationale.                                                                                                                                       | 10-11              |
| Information sources*                                  | 7    | Describe all information sources in the search (e.g., databases with dates of coverage and contact with authors to identify additional sources), as well as the date the most recent search was executed.                                                                                                  | 10                 |
| Search                                                | 8    | Present the full electronic search strategy for at least 1 database, including any limits used, such that it could be repeated.                                                                                                                                                                            | Appendix 2 - 4     |
| Selection of sources of evidence†                     | 9    | State the process for selecting sources of evidence (i.e., screening and eligibility) included in the scoping review.                                                                                                                                                                                      | 10-11              |
| Data charting process‡                                | 10   | Describe the methods of charting data from the included sources of evidence (e.g., calibrated forms or forms that have been tested by the team before their use, and whether data charting was done independently or in duplicate) and any processes for obtaining and confirming data from investigators. | 11-12              |
| Data items                                            | 11   | List and define all variables for which data were sought and any assumptions and simplifications made.                                                                                                                                                                                                     | Appendix 6         |
| Critical appraisal of individual sources of evidence§ | 12   | If done, provide a rationale for conducting a critical appraisal of included sources of evidence; describe the methods used and how this information was used in any data synthesis (if appropriate).                                                                                                      | Not applicable     |

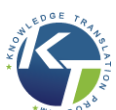

| SECTION                                       | ITEM | PRISMA-ScR CHECKLIST ITEM                                                                                                                                                                       | REPORTED ON PAGE # |
|-----------------------------------------------|------|-------------------------------------------------------------------------------------------------------------------------------------------------------------------------------------------------|--------------------|
| Synthesis of results                          | 13   | Describe the methods of handling and summarizing the data that were charted.                                                                                                                    | 11-12              |
| <b>RESULTS</b>                                |      |                                                                                                                                                                                                 |                    |
| Selection of sources of evidence              | 14   | Give numbers of sources of evidence screened, assessed for eligibility, and included in the review, with reasons for exclusions at each stage, ideally using a flow diagram.                    | Figure 1           |
| Characteristics of sources of evidence        | 15   | For each source of evidence, present characteristics for which data were charted and provide the citations.                                                                                     | Table 1            |
| Critical appraisal within sources of evidence | 16   | If done, present data on critical appraisal of included sources of evidence (see item 12).                                                                                                      | Not applicable     |
| Results of individual sources of evidence     | 17   | For each included source of evidence, present the relevant data that were charted that relate to the review questions and objectives.                                                           | 14-24              |
| Synthesis of results                          | 18   | Summarize and/or present the charting results as they relate to the review questions and objectives.                                                                                            | 13-24              |
| <b>DISCUSSION</b>                             |      |                                                                                                                                                                                                 |                    |
| Summary of evidence                           | 19   | Summarize the main results (including an overview of concepts, themes, and types of evidence available), link to the review questions and objectives, and consider the relevance to key groups. | 25-27              |
| Limitations                                   | 20   | Discuss the limitations of the scoping review process.                                                                                                                                          | 27                 |
| Conclusions                                   | 21   | Provide a general interpretation of the results with respect to the review questions and objectives, as well as potential implications and/or next steps.                                       | 28                 |
| <b>FUNDING</b>                                |      |                                                                                                                                                                                                 |                    |
| Funding                                       | 22   | Describe sources of funding for the included sources of evidence, as well as sources of funding for the scoping review. Describe the role of the funders of the scoping review.                 | 2                  |

JBI = Joanna Briggs Institute; PRISMA-ScR = Preferred Reporting Items for Systematic reviews and Meta-Analyses extension for Scoping Reviews.

\* Where *sources of evidence* (see second footnote) are compiled from, such as bibliographic databases, social media platforms, and Web sites.

† A more inclusive/heterogeneous term used to account for the different types of evidence or data sources (e.g., quantitative and/or qualitative research, expert opinion, and policy documents) that may be eligible in a scoping review as opposed to only studies. This is not to be confused with *information sources* (see first footnote).

‡ The frameworks by Arksey and O'Malley (6) and Levac and colleagues (7) and the JBI guidance (4, 5) refer to the process of data extraction in a scoping review as data charting.

§ The process of systematically examining research evidence to assess its validity, results, and relevance before using it to inform a decision. This term is used for items 12 and 19 instead of "risk of bias" (which is more applicable to systematic reviews of interventions) to include and acknowledge the various sources of evidence that may be used in a scoping review (e.g., quantitative and/or qualitative research, expert opinion, and policy document).

From: Tricco AC, Lillie E, Zarin W, O'Brien KK, Colquhoun H, Levac D, et al. PRISMA Extension for Scoping Reviews (PRISMA-ScR): Checklist and Explanation. *Ann Intern Med.* 2018;169:467–473. doi: 10.7326/M18-0850.

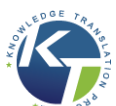

St. Michael's

Inspired Care.  
Inspiring Science.

For peer review only - <http://bmjopen.bmj.com/site/about/guidelines.xhtml>
